# Supplementary material
Source: publisher figshare collection journal article supplement (https://acs.figshare.com/ndownloader/files/9262534)
Supplement: Supplementary file 1 [file 9262534]

 
data_a29w2m_0m
#=========================================================================
# TEXT

_publ_section_acknowledgements   
;
The WFU X-ray Facility thanks the National Science Foundation(grant CHE-0234489)
for funds to purchase the x-ray instrument and computers. 

;
_publ_section_references         
; 
Bruker  (2014). <i>APEX2</i> (Version 2014.7). Bruker AXS Inc., Madison,
Wisconsin, USA.

Bruker (2002). <i>SMART</i> version 5.628. Bruker AXS Inc., Madison, Wisconsin,
USA.

Sheldrick (2014). <i>SHELX</i> (Version 2014/3). Bruker AXS Inc., Madison,
Wisconsin, USA.

Bruker (2014).  SAINT version 8.34A. Bruker AXS Inc., Madison, Wisconsin, USA.

Sheldrick, G. M. (2014). SADABS, Version 2014/5. University of G\"ottingen, 
Germany.
;
#========================================================================= 
_audit_creation_method            'SHELXL-2014/7'
_shelx_SHELXL_version_number      '2014/7'
_chemical_name_systematic         ?
_chemical_name_common             ?
_chemical_melting_point           ?
_chemical_formula_moiety          ?
_chemical_formula_sum
 'C12 H9 N O' 
_chemical_formula_weight          183.20

loop_
 _atom_type_symbol
 _atom_type_description
 _atom_type_scat_dispersion_real
 _atom_type_scat_dispersion_imag
 _atom_type_scat_source
 'C'  'C'   0.0033   0.0016
 'International Tables Vol C Tables 4.2.6.8 and 6.1.1.4'
 'H'  'H'   0.0000   0.0000
 'International Tables Vol C Tables 4.2.6.8 and 6.1.1.4'
 'N'  'N'   0.0061   0.0033
 'International Tables Vol C Tables 4.2.6.8 and 6.1.1.4'
 'O'  'O'   0.0106   0.0060
 'International Tables Vol C Tables 4.2.6.8 and 6.1.1.4'
 
_space_group_crystal_system       monoclinic
_space_group_IT_number            14
_space_group_name_H-M_alt         'P 21/c'
_space_group_name_Hall            '-P 2ybc'
 
_shelx_space_group_comment
;
The symmetry employed for this shelxl refinement is uniquely defined
by the following loop, which should always be used as a source of
symmetry information in preference to the above space-group names.
They are only intended as comments.
;
 
loop_
 _space_group_symop_operation_xyz
 'x, y, z'
 '-x, y+1/2, -z+1/2'
 '-x, -y, -z'
 'x, -y-1/2, z-1/2'
 
_cell_length_a                    7.4869(6)
_cell_length_b                    5.5397(5)
_cell_length_c                    22.6003(18)
_cell_angle_alpha                 90
_cell_angle_beta                  90.8530(10)
_cell_angle_gamma                 90
_cell_volume                      937.25(14)
_cell_formula_units_Z             4
_cell_measurement_temperature     193(2)
_cell_measurement_reflns_used      7949
_cell_measurement_theta_min        3.61
_cell_measurement_theta_max       30.48
 
_exptl_crystal_description       'block'
_exptl_crystal_colour            'colourless'
_exptl_crystal_density_meas       ?
_exptl_crystal_density_method     ?
_exptl_crystal_density_diffrn     1.298          
_exptl_crystal_F_000              384
_exptl_transmission_factor_min    0.7019
_exptl_transmission_factor_max    0.7461
_exptl_crystal_size_max           0.320
_exptl_crystal_size_mid           0.220
_exptl_crystal_size_min           0.140
_exptl_absorpt_coefficient_mu     0.084
_shelx_estimated_absorpt_T_min    0.974
_shelx_estimated_absorpt_T_max    0.988
_exptl_absorpt_correction_type    multi-scan
_exptl_absorpt_correction_T_min   0.7019
_exptl_absorpt_correction_T_max   0.7461
_exptl_absorpt_process_details    
;
 Data were corrected for absorption effects using the 
 multi-scan technique (SADABS). The ratio of minimum
 to maximum apparent transmission was 0.941.  The
 calculated minimum and maximum transmission
 coefficients (based on crystal size) are 0.974 and 0.988.
;
_exptl_absorpt_special_details    ?
_diffrn_ambient_temperature       193(2)
_diffrn_radiation_wavelength      0.71073
_diffrn_radiation_type            MoK\a
_diffrn_source                    'fine-focus sealed x-ray tube'
_diffrn_measurement_device       'Bruker APEX CCD'
_diffrn_radiation_monochromator  graphite 
_diffrn_reflns_reduction_process  narrow-frame 
_diffrn_measurement_method       '\f and \w scans'
_diffrn_detector_area_resol_mean  ?
_diffrn_reflns_number             17323
_diffrn_reflns_av_unetI/netI      0.0154
_diffrn_reflns_av_R_equivalents   0.0247
_diffrn_reflns_limit_h_min        -10
_diffrn_reflns_limit_h_max        10
_diffrn_reflns_limit_k_min        -7
_diffrn_reflns_limit_k_max        7
_diffrn_reflns_limit_l_min        -32
_diffrn_reflns_limit_l_max        32
_diffrn_reflns_theta_min          3.606
_diffrn_reflns_theta_max          30.490
_diffrn_reflns_theta_full         25.242
_diffrn_measured_fraction_theta_max   0.997
_diffrn_measured_fraction_theta_full  0.998
_diffrn_reflns_Laue_measured_fraction_max    0.997
_diffrn_reflns_Laue_measured_fraction_full   0.998
_diffrn_reflns_point_group_measured_fraction_max   0.997
_diffrn_reflns_point_group_measured_fraction_full  0.998
_reflns_number_total              2841
_reflns_number_gt                 2575
_reflns_threshold_expression      'I > 2\s(I)'
_reflns_Friedel_coverage          0.000
_reflns_Friedel_fraction_max      .
_reflns_Friedel_fraction_full     .
 
_reflns_special_details
;
 Reflections were merged by SHELXL according to the crystal
 class for the calculation of statistics and refinement.
 
 _reflns_Friedel_fraction is defined as the number of unique
 Friedel pairs measured divided by the number that would be
 possible theoretically, ignoring centric projections and
 systematic absences.
;
 
_computing_data_collection        'Bruker SMART' 
_computing_cell_refinement        'Bruker SAINT' 
_computing_data_reduction         'Bruker SAINT' 
_computing_structure_solution     'SHELXS-2014 (Sheldrick, 2014)' 
_computing_structure_refinement   'SHELXL-2014 (Sheldrick, 2014)' 
_computing_molecular_graphics     'Bruker APEX2 v2014.7' 
_computing_publication_material   'Bruker APEX2 v2014.7' 
_computing_bruker_data_scaling  'SADABS V2014/5 (Bruker AXS)'
_refine_special_details          
;
 The 5-membered ring is disordered (87/13%) as represented by 
 atoms O1, C1, C2 (and their hydrogens)/ O1', C1' and C2' (and
 their hydrogens).
; 
_refine_ls_structure_factor_coef  Fsqd
_refine_ls_matrix_type            full
_refine_ls_weighting_scheme       calc
_refine_ls_weighting_details
'w=1/[\s^2^(Fo^2^)+(0.0754P)^2^+0.1832P] where P=(Fo^2^+2Fc^2^)/3'
_atom_sites_solution_primary      direct
_atom_sites_solution_secondary    difmap
_atom_sites_solution_hydrogens    geom
_refine_ls_hydrogen_treatment     constr
_refine_ls_extinction_method      none
_refine_ls_extinction_coef        .
_refine_ls_number_reflns          2841
_refine_ls_number_parameters      155
_refine_ls_number_restraints      0
_refine_ls_R_factor_all           0.0499
_refine_ls_R_factor_gt            0.0465
_refine_ls_wR_factor_ref          0.1302
_refine_ls_wR_factor_gt           0.1263
_refine_ls_goodness_of_fit_ref    1.058
_refine_ls_restrained_S_all       1.058
_refine_ls_shift/su_max           0.000
_refine_ls_shift/su_mean          0.000
 
loop_
 _atom_site_label
 _atom_site_type_symbol
 _atom_site_fract_x
 _atom_site_fract_y
 _atom_site_fract_z
 _atom_site_U_iso_or_equiv
 _atom_site_adp_type
 _atom_site_occupancy
 _atom_site_site_symmetry_order  
 _atom_site_calc_flag
 _atom_site_refinement_flags_posn
 _atom_site_refinement_flags_adp
 _atom_site_refinement_flags_occupancy
 _atom_site_disorder_assembly
 _atom_site_disorder_group
O1 O 0.3325(3) -0.0990(3) 0.06710(9) 0.0389(4) Uani 0.873(8) 1 d . . P A 1
C1 C 0.5021(4) -0.0191(6) 0.08207(8) 0.0378(4) Uani 0.873(8) 1 d . . P A 1
H1 H 0.5935 -0.1238 0.0964 0.045 Uiso 0.873(8) 1 calc R U P A 1
C2 C 0.5265(2) 0.2168(5) 0.07472(8) 0.0337(4) Uani 0.873(8) 1 d . . P A 1
H2 H 0.6345 0.3023 0.0821 0.040 Uiso 0.873(8) 1 calc R U P A 1
O1' O 0.5162(18) 0.322(5) 0.0746(6) 0.083(6) Uani 0.127(8) 1 d . . P A 2
C1' C 0.544(3) 0.089(6) 0.0849(7) 0.055(5) Uani 0.127(8) 1 d . . P A 2
H1' H 0.6538 0.0292 0.1005 0.066 Uiso 0.127(8) 1 calc R U P A 2
C2' C 0.404(5) -0.057(5) 0.0716(7) 0.048(5) Uani 0.127(8) 1 d . . P A 2
H2' H 0.4043 -0.2278 0.0752 0.058 Uiso 0.127(8) 1 calc R U P A 2
N1 N -0.07466(14) 0.5702(2) 0.07235(4) 0.0485(3) Uani 1 1 d . . . . .
C3 C 0.35452(12) 0.32417(19) 0.05281(4) 0.0298(2) Uani 1 1 d . . . . .
H3 H 0.3524 0.4505 0.0212 0.036 Uiso 1 1 calc R U . A 1
C4 C 0.23798(15) 0.10512(19) 0.04864(4) 0.0338(2) Uani 1 1 d . . . . .
H4 H 0.1544 0.0899 0.0139 0.041 Uiso 1 1 calc R U . A 1
C5 C 0.19712(12) 0.29429(17) 0.09578(4) 0.02589(19) Uani 1 1 d . . . . .
C6 C 0.22308(11) 0.24611(16) 0.16065(4) 0.02396(18) Uani 1 1 d . . . . .
C7 C 0.31390(12) 0.41264(16) 0.19597(4) 0.0276(2) Uani 1 1 d . . . . .
H7 H 0.3653 0.5519 0.1785 0.033 Uiso 1 1 calc R U . . .
C8 C 0.32971(13) 0.37607(19) 0.25665(4) 0.0314(2) Uani 1 1 d . . . . .
H8 H 0.3921 0.4898 0.2807 0.038 Uiso 1 1 calc R U . . .
C9 C 0.25402(13) 0.1728(2) 0.28203(4) 0.0318(2) Uani 1 1 d . . . . .
H9 H 0.2637 0.1483 0.3236 0.038 Uiso 1 1 calc R U . . .
C10 C 0.16439(13) 0.00568(18) 0.24701(4) 0.0321(2) Uani 1 1 d . . . . .
H10 H 0.1135 -0.1337 0.2645 0.039 Uiso 1 1 calc R U . . .
C11 C 0.14867(13) 0.04140(17) 0.18622(4) 0.0290(2) Uani 1 1 d . . . . .
H11 H 0.0874 -0.0735 0.1622 0.035 Uiso 1 1 calc R U . . .
C12 C 0.04544(13) 0.4465(2) 0.08200(4) 0.0332(2) Uani 1 1 d . . . . .
 
loop_
 _atom_site_aniso_label
 _atom_site_aniso_U_11
 _atom_site_aniso_U_22
 _atom_site_aniso_U_33
 _atom_site_aniso_U_23
 _atom_site_aniso_U_13
 _atom_site_aniso_U_12
O1 0.0510(10) 0.0297(5) 0.0361(6) -0.0041(4) 0.0055(7) 0.0029(6)
C1 0.0440(11) 0.0416(13) 0.0279(7) 0.0017(7) 0.0053(7) 0.0159(9)
C2 0.0256(6) 0.0474(10) 0.0283(6) 0.0014(8) 0.0041(5) 0.0066(7)
O1' 0.082(7) 0.125(15) 0.043(5) 0.036(7) 0.032(5) 0.053(8)
C1' 0.060(10) 0.052(10) 0.052(7) 0.020(8) 0.014(6) 0.034(10)
C2' 0.066(12) 0.052(12) 0.027(6) 0.009(7) 0.010(8) 0.043(10)
N1 0.0389(5) 0.0701(7) 0.0365(5) 0.0021(5) -0.0009(4) 0.0159(5)
C3 0.0290(4) 0.0366(5) 0.0240(4) 0.0032(3) 0.0055(3) -0.0001(4)
C4 0.0421(5) 0.0340(5) 0.0253(4) -0.0049(3) 0.0019(4) -0.0010(4)
C5 0.0258(4) 0.0285(4) 0.0234(4) -0.0011(3) 0.0024(3) -0.0019(3)
C6 0.0232(4) 0.0257(4) 0.0231(4) -0.0001(3) 0.0040(3) -0.0004(3)
C7 0.0293(4) 0.0268(4) 0.0268(4) 0.0006(3) 0.0014(3) -0.0040(3)
C8 0.0322(4) 0.0355(5) 0.0266(4) -0.0027(3) -0.0009(3) -0.0023(4)
C9 0.0308(4) 0.0398(5) 0.0248(4) 0.0049(4) 0.0035(3) 0.0040(4)
C10 0.0340(5) 0.0303(4) 0.0324(5) 0.0068(3) 0.0083(4) -0.0013(4)
C11 0.0303(4) 0.0270(4) 0.0299(4) -0.0007(3) 0.0059(3) -0.0041(3)
C12 0.0295(4) 0.0453(5) 0.0249(4) 0.0000(4) 0.0012(3) 0.0010(4)
 
_geom_special_details
;
 All esds (except the esd in the dihedral angle between two l.s. planes)
 are estimated using the full covariance matrix.  The cell esds are taken
 into account individually in the estimation of esds in distances, angles
 and torsion angles; correlations between esds in cell parameters are only
 used when they are defined by crystal symmetry.  An approximate (isotropic)
 treatment of cell esds is used for estimating esds involving l.s. planes.
;
 
loop_
 _geom_bond_atom_site_label_1
 _geom_bond_atom_site_label_2
 _geom_bond_distance
 _geom_bond_site_symmetry_2
 _geom_bond_publ_flag
O1 C1 1.382(2) . ?
O1 C4 1.395(3) . ?
C1 C2 1.330(3) . ?
C1 H1 0.9500 . ?
C2 C3 1.496(3) . ?
C2 H2 0.9500 . ?
O1' C3 1.300(15) . ?
O1' C1' 1.33(2) . ?
C1' C2' 1.35(3) . ?
C1' H1' 0.9500 . ?
C2' C4 1.616(18) . ?
C2' H2' 0.9500 . ?
N1 C12 1.1487(15) . ?
C3 C4 1.4967(14) . ?
C3 C5 1.5470(12) . ?
C3 H3 1.0000 . ?
C4 C5 1.5286(13) . ?
C4 H4 1.0000 . ?
C5 C12 1.4447(13) . ?
C5 C6 1.5000(12) . ?
C6 C7 1.3907(12) . ?
C6 C11 1.3928(12) . ?
C7 C8 1.3896(12) . ?
C7 H7 0.9500 . ?
C8 C9 1.3885(14) . ?
C8 H8 0.9500 . ?
C9 C10 1.3849(15) . ?
C9 H9 0.9500 . ?
C10 C11 1.3913(13) . ?
C10 H10 0.9500 . ?
C11 H11 0.9500 . ?
 
loop_
 _geom_angle_atom_site_label_1
 _geom_angle_atom_site_label_2
 _geom_angle_atom_site_label_3
 _geom_angle
 _geom_angle_site_symmetry_1
 _geom_angle_site_symmetry_3
 _geom_angle_publ_flag
C1 O1 C4 105.90(18) . . ?
C2 C1 O1 114.29(19) . . ?
C2 C1 H1 122.9 . . ?
O1 C1 H1 122.9 . . ?
C1 C2 C3 108.24(15) . . ?
C1 C2 H2 125.9 . . ?
C3 C2 H2 125.9 . . ?
C3 O1' C1' 102.5(15) . . ?
O1' C1' C2' 115.2(15) . . ?
O1' C1' H1' 122.4 . . ?
C2' C1' H1' 122.4 . . ?
C1' C2' C4 109.2(14) . . ?
C1' C2' H2' 125.4 . . ?
C4 C2' H2' 125.4 . . ?
O1' C3 C4 123.8(11) . . ?
C2 C3 C4 101.33(12) . . ?
O1' C3 C5 118.4(5) . . ?
C2 C3 C5 114.18(10) . . ?
C4 C3 C5 60.27(6) . . ?
C2 C3 H3 121.3 . . ?
C4 C3 H3 121.3 . . ?
C5 C3 H3 121.3 . . ?
O1 C4 C3 110.22(11) . . ?
O1 C4 C5 116.95(11) . . ?
C3 C4 C5 61.50(6) . . ?
C3 C4 C2' 89.1(15) . . ?
C5 C4 C2' 108.5(9) . . ?
O1 C4 H4 118.4 . . ?
C3 C4 H4 118.4 . . ?
C5 C4 H4 118.4 . . ?
C12 C5 C6 113.87(7) . . ?
C12 C5 C4 114.49(8) . . ?
C6 C5 C4 122.34(8) . . ?
C12 C5 C3 113.94(8) . . ?
C6 C5 C3 122.94(7) . . ?
C4 C5 C3 58.24(6) . . ?
C7 C6 C11 119.81(8) . . ?
C7 C6 C5 119.87(8) . . ?
C11 C6 C5 120.24(8) . . ?
C8 C7 C6 120.23(8) . . ?
C8 C7 H7 119.9 . . ?
C6 C7 H7 119.9 . . ?
C9 C8 C7 119.78(9) . . ?
C9 C8 H8 120.1 . . ?
C7 C8 H8 120.1 . . ?
C10 C9 C8 120.22(9) . . ?
C10 C9 H9 119.9 . . ?
C8 C9 H9 119.9 . . ?
C9 C10 C11 120.16(9) . . ?
C9 C10 H10 119.9 . . ?
C11 C10 H10 119.9 . . ?
C10 C11 C6 119.80(9) . . ?
C10 C11 H11 120.1 . . ?
C6 C11 H11 120.1 . . ?
N1 C12 C5 178.33(11) . . ?
 
loop_
 _geom_torsion_atom_site_label_1
 _geom_torsion_atom_site_label_2
 _geom_torsion_atom_site_label_3
 _geom_torsion_atom_site_label_4
 _geom_torsion
 _geom_torsion_site_symmetry_1
 _geom_torsion_site_symmetry_2
 _geom_torsion_site_symmetry_3
 _geom_torsion_site_symmetry_4
 _geom_torsion_publ_flag
C4 O1 C1 C2 -0.4(2) . . . . ?
O1 C1 C2 C3 1.1(2) . . . . ?
C3 O1' C1' C2' -1.3(16) . . . . ?
O1' C1' C2' C4 -2.1(17) . . . . ?
C1' O1' C3 C4 5.1(12) . . . . ?
C1' O1' C3 C5 76.6(12) . . . . ?
C1 C2 C3 C4 -1.23(15) . . . . ?
C1 C2 C3 C5 61.09(16) . . . . ?
C1 O1 C4 C3 -0.49(19) . . . . ?
C1 O1 C4 C5 -67.96(19) . . . . ?
C2 C3 C4 O1 1.04(13) . . . . ?
C5 C3 C4 O1 -110.46(12) . . . . ?
O1' C3 C4 C5 106.0(7) . . . . ?
C2 C3 C4 C5 111.50(10) . . . . ?
O1' C3 C4 C2' -5.7(8) . . . . ?
C5 C3 C4 C2' -111.8(5) . . . . ?
C1' C2' C4 C3 4.0(11) . . . . ?
C1' C2' C4 C5 -55.4(13) . . . . ?
O1 C4 C5 C12 -156.46(12) . . . . ?
C3 C4 C5 C12 104.03(9) . . . . ?
C2' C4 C5 C12 -177.6(13) . . . . ?
O1 C4 C5 C6 -11.90(16) . . . . ?
C3 C4 C5 C6 -111.41(9) . . . . ?
C2' C4 C5 C6 -33.0(13) . . . . ?
O1 C4 C5 C3 99.51(13) . . . . ?
C2' C4 C5 C3 78.4(13) . . . . ?
O1' C3 C5 C12 140.2(13) . . . . ?
C2 C3 C5 C12 165.49(12) . . . . ?
C4 C3 C5 C12 -104.99(9) . . . . ?
O1' C3 C5 C6 -4.4(13) . . . . ?
C2 C3 C5 C6 20.88(16) . . . . ?
C4 C3 C5 C6 110.40(10) . . . . ?
O1' C3 C5 C4 -114.8(13) . . . . ?
C2 C3 C5 C4 -89.52(13) . . . . ?
C12 C5 C6 C7 -83.57(11) . . . . ?
C4 C5 C6 C7 131.67(10) . . . . ?
C3 C5 C6 C7 61.07(12) . . . . ?
C12 C5 C6 C11 93.11(11) . . . . ?
C4 C5 C6 C11 -51.65(12) . . . . ?
C3 C5 C6 C11 -122.25(10) . . . . ?
C11 C6 C7 C8 -0.36(14) . . . . ?
C5 C6 C7 C8 176.34(8) . . . . ?
C6 C7 C8 C9 -0.19(14) . . . . ?
C7 C8 C9 C10 0.59(15) . . . . ?
C8 C9 C10 C11 -0.43(15) . . . . ?
C9 C10 C11 C6 -0.12(14) . . . . ?
C7 C6 C11 C10 0.51(14) . . . . ?
C5 C6 C11 C10 -176.17(8) . . . . ?
 
_refine_diff_density_max    0.412
_refine_diff_density_min   -0.203
_refine_diff_density_rms    0.051

_shelx_res_file
;

    a29w2m_0m.res created by SHELXL-2014/7


TITL a29w2m_0m in P2(1)/c
REM C12H9NO
REM Final Refinement Cycles
REM minor disorder in 5-membered ring (87/13 %)
CELL 0.71073 7.4869 5.5397 22.6003 90.000 90.853 90.000
ZERR 4.00 0.0006 0.0005 0.0018 0.000 0.001 0.000
LATT 1
SYMM -x, y+1/2, -z+1/2
SFAC C H N O
UNIT 48 36 4 4
TEMP -80.0C
SIZE 0.140 0.220 0.320
L.S. 10
ACTA
LIST 4
WPDB -1
FMAP 2
PLAN 20
HTAB
BOND $H
CONF
MPLA 6 C6 C7 C8 C9 C10 C11
MPLA 3 C3 C4 C5
MPLA 5 O1 C1 C2 C3 C4
MPLA 5 O1' C1' C2' C3 C4
MPLA 5 N1 C12 C5 C6 C9

WGHT    0.075400    0.183200
FVAR       0.27449   0.87254
Part 1
O1    4    0.332521   -0.099003    0.067102    21.00000    0.05100    0.02972 =
         0.03607   -0.00408    0.00546    0.00289
C1    1    0.502063   -0.019132    0.082066    21.00000    0.04397    0.04156 =
         0.02787    0.00169    0.00534    0.01589
AFIX  43
H1    2    0.593463   -0.123781    0.096386    21.00000   -1.20000
AFIX   0
C2    1    0.526454    0.216797    0.074716    21.00000    0.02562    0.04736 =
         0.02832    0.00142    0.00412    0.00660
AFIX  43
H2    2    0.634477    0.302333    0.082108    21.00000   -1.20000
AFIX   0
Part 2
O1'   4    0.516230    0.322264    0.074605   -21.00000    0.08157    0.12507 =
         0.04321    0.03621    0.03211    0.05292
C1'   1    0.543827    0.089017    0.084896   -21.00000    0.06016    0.05230 =
         0.05249    0.01998    0.01419    0.03388
AFIX  43
H1'   2    0.653753    0.029190    0.100473   -21.00000   -1.20000
AFIX   0
C2'   1    0.404469   -0.056898    0.071632   -21.00000    0.06588    0.05195 =
         0.02675    0.00917    0.00982    0.04281
AFIX  43
H2'   2    0.404327   -0.227753    0.075245   -21.00000   -1.20000
AFIX   0
PART 0
N1    3   -0.074659    0.570167    0.072354    11.00000    0.03888    0.07015 =
         0.03654    0.00214   -0.00085    0.01589
C3    1    0.354521    0.324167    0.052812    11.00000    0.02900    0.03661 =
         0.02399    0.00324    0.00550   -0.00013
AFIX  13
H3    2    0.352397    0.450480    0.021199    11.00000   -1.20000
AFIX   0
C4    1    0.237981    0.105119    0.048639    11.00000    0.04214    0.03399 =
         0.02532   -0.00495    0.00185   -0.00103
AFIX  13
H4    2    0.154375    0.089889    0.013920    11.00000   -1.20000
AFIX   0
C5    1    0.197124    0.294286    0.095783    11.00000    0.02576    0.02854 =
         0.02342   -0.00113    0.00241   -0.00185
C6    1    0.223082    0.246108    0.160655    11.00000    0.02317    0.02569 =
         0.02311   -0.00009    0.00403   -0.00038
C7    1    0.313898    0.412636    0.195969    11.00000    0.02930    0.02684 =
         0.02684    0.00056    0.00144   -0.00404
AFIX  43
H7    2    0.365295    0.551865    0.178548    11.00000   -1.20000
AFIX   0
C8    1    0.329714    0.376068    0.256649    11.00000    0.03220    0.03552 =
         0.02659   -0.00273   -0.00094   -0.00229
AFIX  43
H8    2    0.392108    0.489765    0.280686    11.00000   -1.20000
AFIX   0
C9    1    0.254021    0.172804    0.282031    11.00000    0.03080    0.03983 =
         0.02475    0.00494    0.00346    0.00404
AFIX  43
H9    2    0.263746    0.148287    0.323557    11.00000   -1.20000
AFIX   0
C10   1    0.164392    0.005683    0.247011    11.00000    0.03399    0.03027 =
         0.03240    0.00675    0.00834   -0.00134
AFIX  43
H10   2    0.113524   -0.133680    0.264539    11.00000   -1.20000
AFIX   0
C11   1    0.148669    0.041398    0.186223    11.00000    0.03030    0.02697 =
         0.02994   -0.00070    0.00587   -0.00407
AFIX  43
H11   2    0.087362   -0.073496    0.162227    11.00000   -1.20000
AFIX   0
C12   1    0.045439    0.446500    0.081996    11.00000    0.02952    0.04528 =
         0.02487    0.00000    0.00122    0.00095

HKLF 4 1 1 0 0 0 1 0 0 0 1

REM  a29w2m_0m in P2(1)/c
REM R1 =  0.0465 for    2575 Fo > 4sig(Fo)  and  0.0499 for all    2841 data
REM    155 parameters refined using      0 restraints

END

WGHT      0.0755      0.1835

REM Instructions for potential hydrogen bonds
EQIV $1 x+1, y, z
HTAB C2 N1_$1
EQIV $2 x, y-1, z
HTAB C2' O1'_$2

REM Highest difference peak  0.412,  deepest hole -0.203,  1-sigma level  0.051
Q1    1   0.2581  0.3346  0.1800  11.00000  0.05    0.41
Q2    1   0.1878  0.1501  0.1770  11.00000  0.05    0.40
Q3    1   0.2218  0.0878  0.2628  11.00000  0.05    0.35
Q4    1   0.1605  0.0256  0.2169  11.00000  0.05    0.35
Q5    1   0.3143  0.3898  0.2274  11.00000  0.05    0.34
Q6    1   0.2782  0.2733  0.2684  11.00000  0.05    0.33
Q7    1   0.2056  0.2742  0.1305  11.00000  0.05    0.32
Q8    1   0.3095  0.1934  0.0436  11.00000  0.05    0.28
Q9    1  -0.0697  0.4359  0.0643  11.00000  0.05    0.25
Q10   1   0.1934  0.1723  0.0796  11.00000  0.05    0.24
Q11   1   0.1742  0.0139  0.0243  11.00000  0.05    0.23
Q12   1   0.2878  0.3458  0.0810  11.00000  0.05    0.22
Q13   1   0.3426  0.4661  0.0399  11.00000  0.05    0.22
Q14   1   0.1125  0.3651  0.0958  11.00000  0.05    0.20
Q15   1   0.2823 -0.0014  0.0558  11.00000  0.05    0.20
Q16   1   0.5304 -0.1826  0.0914  11.00000  0.05    0.17
Q17   1  -0.0346  0.4547  0.0918  11.00000  0.05    0.16
Q18   1   0.2567  0.1673  0.2976  11.00000  0.05    0.14
Q19   1   0.4973  0.0810  0.0640  11.00000  0.05    0.13
Q20   1   0.4840  0.0936  0.0886  11.00000  0.05    0.12
;
_shelx_res_checksum    5801

_shelx_hkl_file
;
  -2   0   0  267.00    6.36
   2   0   0  260.28    6.39
   2   0   0  268.24    6.59
  -2   0   0  260.98    6.27
   3   0   0    0.01    0.02
   3   0   0    0.15    0.03
  -3   0   0   -0.01    0.02
  -3   0   0    0.07    0.02
   4   0   0    2.88    0.13
   4   0   0    3.07    0.12
  -4   0   0    2.94    0.11
  -5   0   0   10.30    0.29
   5   0   0    9.91    0.30
   5   0   0    9.81    0.32
  -5   0   0   10.11    0.30
   6   0   0   24.25    0.68
   6   0   0   23.74    0.64
  -6   0   0   23.73    0.63
  -6   0   0   24.24    0.64
  -7   0   0   26.75    0.72
   7   0   0   26.91    0.73
  -7   0   0   26.20    0.71
   7   0   0   28.32    0.78
   8   0   0    0.92    0.10
  -8   0   0    0.77    0.09
   8   0   0    0.64    0.11
  -8   0   0    1.10    0.09
   9   0   0    0.27    0.07
   9   0   0    0.31    0.08
  -9   0   0    0.22    0.06
  -9   0   0    0.26    0.06
  10   0   0    3.13    0.19
 -10   0   0    2.79    0.18
   0  -1   0   -0.05    0.01
   0   1   0   -0.06    0.01
   0   1   0   -0.08    0.01
   1  -1   0  681.92   16.12
  -1  -1   0  684.25   16.28
   1  -1   0  631.53   15.96
  -1  -1   0  636.08   16.09
  -1  -1   0  705.81   16.18
   1   1   0  709.08   16.16
   1   1   0  680.76   15.99
  -2  -1   0   20.39    0.47
   2  -1   0   19.86    0.47
  -2  -1   0   19.43    0.48
   2  -1   0   17.27    0.48
  -2  -1   0   19.45    0.50
  -2   1   0   19.49    0.48
  -2   1   0   19.20    0.48
   2   1   0   19.72    0.50
   2   1   0   19.44    0.48
   2   1   0   20.66    0.48
  -3  -1   0   87.56    2.07
  -3  -1   0   88.39    2.05
   3  -1   0   87.60    2.06
   3  -1   0   86.96    2.07
  -3  -1   0   87.50    2.10
  -3   1   0   86.52    2.07
   3   1   0   94.28    2.05
   3   1   0   86.42    2.07
   3   1   0   86.11    2.09
  -3   1   0   85.20    2.07
   4  -1   0    0.86    0.06
  -4  -1   0    0.92    0.08
  -4  -1   0    0.87    0.06
   4  -1   0    0.77    0.07
  -4  -1   0    0.82    0.05
  -4   1   0    1.01    0.06
  -4   1   0    0.93    0.06
   4   1   0    0.79    0.06
   4   1   0    1.02    0.08
   4   1   0    0.90    0.05
  -5  -1   0    1.42    0.08
  -5  -1   0    1.55    0.08
   5  -1   0    1.67    0.11
   5  -1   0    1.55    0.08
  -5   1   0    1.41    0.08
   5   1   0    1.39    0.11
   5   1   0    1.38    0.09
  -5   1   0    1.43    0.09
  -6  -1   0   22.13    0.60
   6  -1   0   21.56    0.59
   6  -1   0   21.66    0.63
  -6  -1   0   21.74    0.58
  -6   1   0   23.13    0.60
  -6   1   0   22.70    0.60
   6   1   0   22.13    0.64
   6   1   0   22.37    0.60
   7  -1   0    0.56    0.07
  -7  -1   0    0.54    0.07
  -7  -1   0    0.47    0.07
   7  -1   0    0.57    0.09
   7   1   0    0.60    0.10
  -7   1   0    0.58    0.07
  -7   1   0    0.53    0.08
   7   1   0    0.57    0.08
  -8  -1   0    1.36    0.13
   8  -1   0    1.28    0.12
  -8  -1   0    1.29    0.12
   8  -1   0    1.37    0.15
   8   1   0    1.47    0.18
  -8   1   0    1.20    0.12
  -8   1   0    1.20    0.11
   8   1   0    1.40    0.13
  -9  -1   0    0.02    0.04
   9  -1   0    0.09    0.05
   9  -1   0    0.18    0.07
   9   1   0    0.10    0.05
  -9   1   0    0.09    0.05
  -9   1   0    0.04    0.04
  10  -1   0    1.82    0.20
  10  -1   0    1.76    0.14
 -10  -1   0    2.16    0.15
  10   1   0    2.26    0.16
 -10   1   0    1.98    0.15
 -10   1   0    1.82    0.14
   0  -2   0   62.39    1.46
   0  -2   0   62.21    1.47
   0   2   0   61.40    1.47
   0   2   0   61.81    1.47
   1  -2   0   46.34    1.10
  -1  -2   0   45.86    1.12
  -1  -2   0   46.38    1.11
  -1  -2   0   46.53    1.11
   1  -2   0   46.89    1.10
  -1  -2   0   47.50    1.09
  -1   2   0   47.03    1.11
   1   2   0   47.67    1.09
  -1   2   0   46.16    1.11
   1   2   0   41.17    1.11
   2  -2   0   42.91    1.04
   2  -2   0   43.89    1.01
  -2  -2   0   43.13    1.06
  -2  -2   0   42.69    1.04
   2  -2   0   41.82    1.03
  -2  -2   0   42.02    1.04
  -2  -2   0   44.30    1.02
   2   2   0   42.42    1.04
  -2   2   0   44.09    1.03
   2   2   0   42.59    1.03
  -2   2   0   42.54    1.04
   3  -2   0    0.29    0.04
   3  -2   0    0.26    0.04
   3  -2   0    0.29    0.03
  -3  -2   0    0.31    0.03
  -3  -2   0    0.28    0.04
  -3  -2   0    0.31    0.06
  -3   2   0    0.35    0.04
   3   2   0    0.39    0.06
  -3   2   0    0.31    0.04
   3   2   0    0.23    0.04
   3   2   0    0.34    0.04
  -4  -2   0   25.96    0.68
  -4  -2   0   27.30    0.73
   4  -2   0   26.83    0.69
  -4  -2   0   27.22    0.66
   4  -2   0   27.04    0.66
   4   2   0   26.64    0.67
  -4   2   0   26.14    0.68
   4   2   0   26.82    0.72
  -4   2   0   26.47    0.68
  -4   2   0   27.02    0.65
   4   2   0   25.67    0.68
   5  -2   0   13.22    0.36
  -5  -2   0   12.95    0.38
   5  -2   0   12.86    0.39
  -5  -2   0   13.29    0.35
   5   2   0   13.13    0.38
  -5   2   0   12.73    0.38
   5   2   0   13.16    0.42
   5   2   0   14.24    0.36
  -5   2   0   12.99    0.38
  -6  -2   0    6.18    0.20
   6  -2   0    5.85    0.24
   6  -2   0    6.03    0.21
  -6  -2   0    6.07    0.22
   6   2   0    6.13    0.23
  -6   2   0    6.17    0.23
  -6   2   0    5.73    0.22
   7  -2   0    5.89    0.22
  -7  -2   0    5.90    0.23
   7  -2   0    5.56    0.25
   7   2   0    5.85    0.23
  -7   2   0    5.22    0.22
  -7   2   0    5.54    0.23
   8  -2   0    0.93    0.13
   8  -2   0    0.96    0.11
   8  -2   0    0.99    0.10
  -8  -2   0    0.92    0.11
  -8   2   0    0.97    0.11
  -8   2   0    0.96    0.11
   8   2   0    0.88    0.11
   9  -2   0    5.13    0.28
  -9  -2   0    5.53    0.24
   9  -2   0    5.84    0.26
   9  -2   0    5.43    0.24
  -9   2   0    5.92    0.26
   9   2   0    6.07    0.26
  10  -2   0    0.48    0.09
 -10  -2   0    0.50    0.09
  10  -2   0    0.45    0.11
  10   2   0    0.37    0.08
 -10   2   0    0.33    0.08
   0  -3   0    0.09    0.02
   0  -3   0    0.10    0.03
   0   3   0    0.12    0.02
   0   3   0    0.08    0.03
   0   3   0    0.05    0.03
  -1  -3   0    3.50    0.13
   1  -3   0    3.26    0.13
  -1  -3   0    3.43    0.15
   1  -3   0    3.56    0.13
  -1  -3   0    3.34    0.13
  -1  -3   0    3.64    0.12
  -1   3   0    3.30    0.13
   1   3   0    3.67    0.11
  -1   3   0    3.37    0.13
   1   3   0    3.15    0.14
  -2  -3   0    8.17    0.22
  -2  -3   0    7.81    0.24
   2  -3   0    7.68    0.23
  -2  -3   0    7.73    0.24
   2  -3   0    8.16    0.20
   2  -3   0    7.53    0.23
  -2  -3   0    7.89    0.27
  -2   3   0    7.28    0.24
   2   3   0    7.86    0.22
   2   3   0    7.98    0.25
  -3  -3   0   11.44    0.29
   3  -3   0   10.86    0.32
  -3  -3   0   11.00    0.32
   3  -3   0   10.56    0.32
   3  -3   0   11.58    0.29
  -3  -3   0   10.57    0.36
  -3  -3   0   10.82    0.32
  -3   3   0   11.32    0.31
   3   3   0   10.84    0.31
   3   3   0   10.16    0.32
  -3   3   0   10.85    0.32
   4  -3   0   14.06    0.41
   4  -3   0   13.85    0.41
  -4  -3   0   14.42    0.46
  -4  -3   0   14.47    0.41
  -4  -3   0   14.83    0.38
  -4   3   0   13.91    0.41
  -4   3   0   15.49    0.39
   4   3   0   13.70    0.40
   4   3   0   14.17    0.40
   5  -3   0    1.18    0.09
  -5  -3   0    1.09    0.10
   5  -3   0    1.10    0.10
   5   3   0    1.12    0.09
   5   3   0    1.00    0.09
  -5   3   0    0.95    0.10
  -6  -3   0    4.16    0.18
   6  -3   0    4.43    0.20
   6  -3   0    4.38    0.19
   6   3   0    4.30    0.18
  -6   3   0    3.93    0.18
   7  -3   0    2.15    0.14
   7  -3   0    2.11    0.16
  -7  -3   0    2.44    0.14
  -7   3   0    2.10    0.14
   7   3   0    2.17    0.14
  -8  -3   0    1.25    0.12
   8  -3   0    1.50    0.14
   8  -3   0    1.45    0.15
   8   3   0    1.29    0.13
  -8   3   0    1.19    0.12
  -9  -3   0    0.36    0.08
   9  -3   0    0.44    0.09
   9  -3   0    0.23    0.08
   9   3   0    0.35    0.08
  -9   3   0    0.28    0.07
   0  -4   0    0.08    0.03
   0   4   0    0.06    0.03
   0   4   0    0.03    0.03
   1  -4   0    3.73    0.16
  -1  -4   0    3.62    0.17
  -1  -4   0    3.90    0.13
  -1  -4   0    3.73    0.16
   1  -4   0    3.72    0.14
  -1  -4   0    3.47    0.15
   1   4   0    3.71    0.16
  -1   4   0    3.52    0.15
  -1   4   0    4.08    0.16
  -2  -4   0    8.66    0.24
   2  -4   0    7.93    0.25
  -2  -4   0    8.13    0.27
   2  -4   0    7.76    0.26
  -2  -4   0    8.38    0.30
  -2  -4   0    7.83    0.26
   2   4   0    7.98    0.23
  -2   4   0    8.13    0.27
   2   4   0    7.87    0.27
  -2   4   0    7.71    0.26
   3  -4   0   66.73    1.67
  -3  -4   0   69.36    1.69
  -3  -4   0   69.85    1.74
  -3  -4   0   68.97    1.68
   3  -4   0   68.68    1.68
  -3   4   0   67.74    1.68
   3   4   0   67.53    1.69
   3   4   0   70.65    1.65
  -3   4   0   70.28    1.68
  -4  -4   0    1.84    0.14
   4  -4   0    1.27    0.10
   4  -4   0    1.31    0.10
  -4  -4   0    1.64    0.11
  -4   4   0    1.65    0.10
   4   4   0    1.64    0.11
  -4   4   0    1.85    0.11
   4   4   0    1.57    0.09
   5  -4   0    4.43    0.20
   5  -4   0    4.72    0.20
  -5  -4   0    4.72    0.20
  -5   4   0    4.76    0.20
   5   4   0    4.75    0.19
   5   4   0    4.30    0.19
   6  -4   0    0.21    0.06
   6  -4   0    0.18    0.06
  -6  -4   0    0.18    0.05
   6   4   0    0.19    0.05
  -6   4   0    0.20    0.06
   7  -4   0   -0.04    0.04
  -7  -4   0    0.03    0.04
   7  -4   0   -0.02    0.04
   7   4   0    0.02    0.04
  -7   4   0   -0.03    0.04
   8  -4   0    0.19    0.07
  -8  -4   0    0.24    0.06
   8  -4   0    0.14    0.06
  -8   4   0    0.30    0.07
   8   4   0    0.21    0.06
  -9  -4   0    1.26    0.14
   9  -4   0    1.71    0.16
   9  -4   0    1.23    0.16
   9   4   0    1.62    0.13
  -9   4   0    1.43    0.15
   0  -5   0   -0.03    0.03
   0  -5   0    0.02    0.04
   0  -5   0   -0.04    0.04
   0  -5   0    0.03    0.03
   0   5   0   -0.01    0.04
  -1  -5   0    1.60    0.13
  -1  -5   0    1.27    0.10
   1  -5   0    1.33    0.09
   1  -5   0    1.39    0.11
  -1  -5   0    1.30    0.10
  -1   5   0    1.48    0.10
   1   5   0    1.28    0.11
  -1   5   0    1.26    0.11
  -2  -5   0   17.34    0.50
  -2  -5   0   17.07    0.50
  -2  -5   0   17.30    0.54
   2  -5   0   17.28    0.51
   2  -5   0   16.59    0.48
  -2   5   0   16.76    0.50
   2   5   0   17.41    0.52
  -2   5   0   17.89    0.51
   3  -5   0    0.11    0.04
   3  -5   0    0.24    0.06
  -3  -5   0    0.09    0.04
  -3  -5   0    0.04    0.04
  -3  -5   0    0.16    0.06
  -3   5   0    0.06    0.04
   3   5   0    0.11    0.05
  -3   5   0    0.12    0.05
  -4  -5   0    0.18    0.05
  -4  -5   0    0.25    0.07
   4  -5   0    0.18    0.05
   4  -5   0    0.10    0.05
  -4   5   0    0.08    0.05
   4   5   0    0.15    0.06
   5  -5   0    0.17    0.06
   5  -5   0    0.16    0.06
  -5  -5   0    0.06    0.05
   5   5   0    0.06    0.04
  -5   5   0    0.08    0.05
   6  -5   0    0.27    0.07
  -6  -5   0    0.35    0.07
   6  -5   0    0.30    0.07
  -6   5   0    0.27    0.07
   7  -5   0    0.14    0.07
  -7  -5   0    0.00    0.04
   7  -5   0   -0.05    0.04
  -7   5   0    0.04    0.05
   8  -5   0    0.77    0.12
  -8  -5   0    0.66    0.10
   8  -5   0    0.70    0.11
  -8   5   0    0.67    0.10
   8   5   0    0.51    0.08
   0  -6   0    1.79    0.14
   0  -6   0    1.79    0.15
   0  -6   0    1.91    0.14
   0   6   0    1.89    0.14
  -1  -6   0    0.09    0.05
  -1  -6   0    0.08    0.05
  -1  -6   0    0.07    0.06
  -1   6   0    0.12    0.05
   1   6   0    0.02    0.05
  -1   6   0    0.01    0.05
  -2  -6   0    0.95    0.11
  -2  -6   0    0.79    0.12
   2  -6   0    0.82    0.09
  -2  -6   0    0.65    0.09
   2  -6   0    0.83    0.11
   2   6   0    0.82    0.11
  -2   6   0    0.69    0.09
  -2   6   0    0.76    0.10
  -3  -6   0    3.10    0.21
   3  -6   0    3.00    0.16
  -3  -6   0    2.95    0.17
   3  -6   0    2.71    0.17
  -3  -6   0    3.07    0.17
   3   6   0    2.84    0.18
  -3   6   0    3.12    0.17
  -3   6   0    2.67    0.16
  -4  -6   0    0.49    0.10
  -4  -6   0    0.80    0.11
   4  -6   0    0.46    0.09
   4  -6   0    0.65    0.09
  -4   6   0    0.75    0.10
   4   6   0    0.76    0.11
   5  -6   0    0.20    0.07
  -5  -6   0    0.24    0.06
   5  -6   0    0.17    0.07
  -5   6   0    0.24    0.06
   5   6   0    0.25    0.07
  -6  -6   0    0.45    0.08
   6  -6   0    0.57    0.09
   6  -6   0    0.48    0.09
  -6   6   0    0.47    0.09
   0  -7   0    0.01    0.04
   0  -7   0    0.02    0.05
   0  -7   0   -0.05    0.04
   0   7   0    0.02    0.05
  -1  -7   0    0.23    0.07
   1  -7   0    0.15    0.06
  -1  -7   0    0.21    0.07
   1  -7   0    0.12    0.07
   1  -7   0    0.18    0.07
  -1  -7   0    0.22    0.08
  -1   7   0    0.16    0.06
   1   7   0    0.28    0.08
  -2  -7   0    0.12    0.06
  -2  -7   0    0.30    0.09
  -2  -7   0    0.08    0.06
   2   7   0    0.20    0.07
  -2   7   0    0.18    0.06
  -2   7   0    0.17    0.06
  -3  -7   0    1.73    0.20
   3  -7   0    1.59    0.16
  -3  -7   0    1.52    0.15
  -3  -7   0    1.40    0.15
  -3   7   0    1.31    0.14
   3   7   0    1.61    0.15
  -3   7   0    1.62    0.13
   4  -7   0    0.04    0.05
  -4  -7   0    0.11    0.05
   4  -7   0    0.01    0.04
  -4   7   0    0.10    0.06
   4   7   0    0.09    0.06
 -10   0   1    0.03    0.04
  10   0  -1    0.03    0.04
   9   0  -1    0.06    0.06
   9   0  -1   -0.01    0.04
  -9   0   1   -0.04    0.04
  -9   0   1   -0.04    0.03
  -8   0   1   -0.02    0.03
   8   0  -1    0.05    0.05
   8   0  -1   -0.04    0.03
  -8   0   1   -0.01    0.03
  -7   0   1    0.01    0.04
   7   0  -1    0.00    0.04
   7   0  -1    0.05    0.05
  -7   0   1    0.04    0.04
  -6   0   1   -0.06    0.02
   6   0  -1    0.08    0.05
   6   0  -1    0.01    0.03
  -6   0   1    0.00    0.03
  -5   0   1   -0.01    0.02
   5   0  -1    0.01    0.03
  -5   0   1   -0.01    0.02
   5   0  -1   -0.04    0.02
  -4   0   1    0.01    0.02
   4   0  -1   -0.05    0.02
   4   0  -1   -0.01    0.03
  -4   0   1    0.00    0.02
  -3   0   1   -0.01    0.01
  -3   0   1   -0.03    0.01
   3   0  -1   -0.01    0.02
   3   0  -1    0.01    0.02
   2   0  -1   -0.02    0.01
  -2   0   1    0.00    0.01
  -2   0   1   -0.01    0.01
   2   0  -1    0.01    0.02
   2   0   1    0.00    0.02
  -2   0  -1    0.00    0.01
  -2   0  -1    0.01    0.01
   2   0   1    0.00    0.01
   3   0   1    0.06    0.02
  -3   0  -1   -0.02    0.02
   3   0   1   -0.05    0.02
  -3   0  -1   -0.08    0.01
   4   0   1    0.06    0.03
  -4   0  -1   -0.01    0.02
  -4   0  -1   -0.02    0.02
   4   0   1   -0.01    0.02
   5   0   1    0.03    0.04
  -5   0  -1   -0.03    0.02
   5   0   1   -0.01    0.02
  -5   0  -1   -0.02    0.02
   6   0   1   -0.02    0.04
  -6   0  -1   -0.03    0.03
   6   0   1   -0.02    0.03
  -6   0  -1   -0.02    0.03
   7   0   1    0.14    0.06
  -7   0  -1   -0.03    0.03
   7   0   1    0.01    0.04
  -7   0  -1    0.05    0.04
   8   0   1    0.08    0.04
   8   0   1    0.02    0.05
  -8   0  -1    0.00    0.03
  -8   0  -1    0.03    0.04
  -9   0  -1    0.00    0.04
  -9   0  -1    0.01    0.03
   9   0   1    0.01    0.04
   9   0   1    0.04    0.05
 -10   0  -1    0.05    0.04
  10   0   1   -0.09    0.05
  10   0   1    0.02    0.04
  10  -1  -1    0.72    0.10
 -10  -1   1    0.84    0.11
  10  -1  -1    0.43    0.10
  10  -1  -1    0.76    0.10
 -10   1   1    0.63    0.10
  10   1  -1    0.81    0.11
   9  -1  -1    2.63    0.16
   9  -1  -1    2.51    0.19
  -9  -1   1    3.10    0.17
  -9   1   1    3.10    0.17
   9   1  -1    2.79    0.17
  -9   1   1    2.76    0.16
   8  -1  -1   12.41    0.44
  -8  -1   1   12.22    0.39
   8  -1  -1   11.83    0.39
  -8   1   1   11.88    0.38
  -8   1   1   12.41    0.40
   8   1  -1   11.88    0.40
  -7  -1   1    0.69    0.07
  -7  -1   1    0.58    0.08
   7  -1  -1    0.68    0.08
   7  -1  -1    0.76    0.11
   7   1  -1    0.71    0.10
  -7   1   1    0.66    0.08
  -7   1   1    0.55    0.07
   7   1  -1    0.61    0.08
   6  -1  -1    1.93    0.11
  -6  -1   1    1.80    0.11
   6  -1  -1    1.83    0.13
  -6  -1   1    1.75    0.09
   6   1  -1    1.98    0.14
   6   1  -1    1.92    0.11
  -6   1   1    1.84    0.11
  -6   1   1    1.73    0.10
   5  -1  -1    2.58    0.11
  -5  -1   1    2.48    0.10
   5  -1  -1    2.47    0.13
  -5  -1   1    2.66    0.12
  -5   1   1    2.50    0.12
   5   1  -1    2.62    0.14
  -5   1   1    2.61    0.11
   5   1  -1    2.52    0.12
   4  -1  -1   10.50    0.32
  -4  -1   1   10.97    0.34
  -4  -1   1   10.73    0.29
  -4  -1   1   10.67    0.31
   4  -1  -1   10.78    0.30
   4   1  -1   10.46    0.31
  -4   1   1   10.53    0.31
  -4   1   1   11.07    0.30
   4   1  -1   11.11    0.34
   4   1  -1   11.24    0.28
   3  -1  -1   39.06    0.93
   3  -1  -1   38.60    0.95
  -3  -1   1   40.39    0.98
  -3  -1   1   39.35    0.93
  -3  -1   1   38.26    0.94
   3   1  -1   38.90    0.94
   3   1  -1   39.23    0.93
  -3   1   1   37.86    0.94
  -3   1   1   38.69    0.94
   3   1  -1   38.25    0.97
  -2  -1   1  107.72    2.53
   2  -1  -1  110.19    2.55
  -2  -1   1  109.78    2.55
  -2  -1   1  109.29    2.57
   2  -1  -1  109.41    2.54
  -2   1   1  109.90    2.55
   2   1  -1  107.90    2.55
   2   1  -1  109.73    2.54
  -2   1   1  108.39    2.55
   2   1  -1  107.14    2.58
   1  -1  -1   44.48    1.04
   1  -1  -1   45.10    1.04
  -1  -1   1   43.85    1.04
  -1  -1   1   42.47    1.05
  -1  -1   1   44.57    1.04
   1   1  -1   44.37    1.03
   1   1  -1   43.85    1.04
  -1   1   1   43.00    1.03
   0  -1  -1    4.28    0.12
   0  -1   1    4.14    0.11
   0   1   1    4.60    0.12
   0   1  -1    4.22    0.12
   0   1   1    4.21    0.12
  -1  -1  -1  350.31    8.48
  -1  -1  -1  345.62    8.44
  -1  -1  -1  338.09    8.55
   1  -1   1  353.57    8.17
  -1  -1  -1  360.75    8.50
  -1   1  -1  355.70    8.48
   1   1   1  337.60    8.31
   1   1   1  361.08    8.50
  -1   1  -1  343.89    8.39
  -2  -1  -1  352.77    8.66
  -2  -1  -1  350.83    8.43
   2  -1   1  358.70    8.52
  -2  -1  -1  361.83    8.55
   2  -1   1  344.33    8.47
  -2   1  -1  350.82    8.72
   2   1   1  368.96    8.65
   2   1   1  353.85    8.47
  -2   1  -1  354.22    8.52
   2   1   1  349.55    8.55
  -3  -1  -1   38.14    0.98
  -3  -1  -1   40.42    0.95
   3  -1   1   40.36    0.95
  -3  -1  -1   39.95    0.96
   3  -1   1   39.17    0.96
  -3   1  -1   39.67    0.96
   3   1   1   39.13    0.96
   3   1   1   41.22    0.94
   3   1   1   37.84    0.98
  -3   1  -1   39.59    0.96
  -4  -1  -1   57.66    1.35
   4  -1   1   53.39    1.32
   4  -1   1   52.34    1.30
  -4  -1  -1   53.26    1.31
  -4  -1  -1   54.98    1.30
   4   1   1   53.12    1.31
  -4   1  -1   53.61    1.31
  -4   1  -1   54.19    1.31
   4   1   1   57.91    1.29
   4   1   1   53.00    1.34
  -5  -1  -1    0.02    0.02
   5  -1   1    0.07    0.03
   5  -1   1    0.03    0.03
  -5  -1  -1    0.04    0.02
  -5   1  -1    0.07    0.03
   5   1   1    0.04    0.04
   5   1   1    0.00    0.03
  -5   1  -1    0.06    0.03
  -6  -1  -1    7.77    0.25
   6  -1   1    8.12    0.29
   6  -1   1    7.97    0.26
  -6  -1  -1    7.62    0.26
  -6   1  -1    8.25    0.26
   6   1   1    7.81    0.27
  -6   1  -1    7.86    0.26
   6   1   1    8.12    0.30
  -7  -1  -1    6.93    0.25
   7  -1   1    6.88    0.25
  -7  -1  -1    6.96    0.24
   7  -1   1    6.81    0.28
  -7   1  -1    6.96    0.25
  -7   1  -1    7.10    0.25
   7   1   1    6.86    0.26
   7   1   1    6.95    0.29
  -8  -1  -1    0.25    0.06
   8  -1   1    0.13    0.05
  -8  -1  -1    0.13    0.05
   8  -1   1    0.24    0.07
  -8   1  -1    0.18    0.06
  -8   1  -1    0.22    0.06
   8   1   1    0.27    0.06
   8   1   1    0.20    0.07
  -9  -1  -1    0.41    0.08
   9  -1   1    0.37    0.07
   9  -1   1    0.31    0.09
  -9   1  -1    0.29    0.06
   9   1   1    0.19    0.06
  -9   1  -1    0.44    0.08
 -10  -1  -1    1.70    0.13
  10  -1   1    1.41    0.14
  10  -1   1    1.93    0.17
 -10   1  -1    1.73    0.14
 -10   1  -1    1.64    0.13
  10   1   1    1.42    0.15
 -10  -2   1    1.65    0.13
  10  -2  -1    1.83    0.20
  10  -2  -1    1.69    0.13
  10   2  -1    1.66    0.16
 -10   2   1    1.80    0.17
   9  -2  -1    1.87    0.14
   9  -2  -1    2.06    0.18
  -9  -2   1    1.81    0.14
   9   2  -1    1.66    0.16
  -9   2   1    2.08    0.14
  -8  -2   1    1.52    0.12
   8  -2  -1    1.60    0.16
   8  -2  -1    1.59    0.12
   8  -2  -1    1.51    0.11
   8   2  -1    1.68    0.13
  -8   2   1    1.55    0.12
  -7  -2   1   12.73    0.41
   7  -2  -1   13.70    0.45
   7  -2  -1   13.06    0.41
   7  -2  -1   13.51    0.39
   7   2  -1   12.98    0.41
  -7   2   1   12.69    0.41
   6  -2  -1    7.09    0.23
   6  -2  -1    7.09    0.25
   6  -2  -1    7.00    0.27
  -6  -2   1    7.04    0.25
  -6   2   1    7.11    0.25
  -6   2   1    7.30    0.25
   6   2  -1    7.12    0.25
   5  -2  -1    0.39    0.06
  -5  -2   1    0.35    0.05
  -5  -2   1    0.47    0.05
   5  -2  -1    0.30    0.05
   5  -2  -1    0.40    0.05
  -5   2   1    0.38    0.06
   5   2  -1    0.40    0.06
   5   2  -1    0.36    0.04
   5   2  -1    0.40    0.07
  -5   2   1    0.50    0.06
  -4  -2   1   78.52    1.90
  -4  -2   1   76.00    1.86
   4  -2  -1   76.77    1.86
   4  -2  -1   77.68    1.83
  -4  -2   1   78.10    1.82
   4  -2  -1   77.00    1.87
   4   2  -1   76.74    1.85
  -4   2   1   75.17    1.86
   4   2  -1   78.79    1.89
  -4   2   1   81.38    1.82
   4   2  -1   75.50    1.84
   3  -2  -1    8.26    0.25
   3  -2  -1    8.46    0.25
  -3  -2   1    8.77    0.23
  -3  -2   1    8.80    0.28
  -3  -2   1    8.49    0.25
   3  -2  -1    8.62    0.23
   3   2  -1    8.34    0.25
   3   2  -1    8.95    0.28
  -3   2   1    8.51    0.25
  -3   2   1    8.76    0.23
   3   2  -1    8.35    0.25
   2  -2  -1   11.67    0.32
  -2  -2   1   11.76    0.34
   2  -2  -1   12.00    0.29
   2  -2  -1   11.71    0.32
  -2  -2   1   11.78    0.32
  -2  -2   1   12.65    0.30
  -2  -2   1   11.41    0.32
   2   2  -1   11.38    0.32
   2   2  -1   11.83    0.31
  -2   2   1   11.70    0.32
  -2   2   1   11.67    0.31
  -1  -2   1  151.41    3.54
   1  -2  -1  149.96    3.54
   1  -2  -1  149.49    3.54
  -1  -2   1  150.02    3.55
  -1  -2   1  154.56    3.54
  -1  -2   1  155.16    3.52
   1   2  -1  151.54    3.52
   1   2  -1  148.34    3.55
  -1   2   1  151.88    3.54
  -1   2   1  154.11    3.54
   0  -2   1   28.06    0.67
   0  -2  -1   28.29    0.68
   0  -2  -1   27.39    0.69
   0  -2   1   27.84    0.69
   0   2   1   28.02    0.69
   0   2  -1   28.41    0.69
   0   2   1   28.44    0.68
   0   2  -1   28.14    0.69
   1  -2   1    3.70    0.11
  -1  -2  -1    3.92    0.14
   1  -2   1    3.94    0.12
  -1  -2  -1    3.90    0.11
  -1  -2  -1    3.58    0.12
  -1  -2  -1    3.68    0.12
  -1   2  -1    3.49    0.12
   1   2   1    3.82    0.11
  -1   2  -1    3.89    0.12
  -2  -2  -1   24.20    0.63
   2  -2   1   23.03    0.60
   2  -2   1   23.57    0.59
   2  -2   1   25.07    0.58
  -2  -2  -1   23.66    0.60
  -2  -2  -1   22.92    0.60
   2  -2   1   25.05    0.59
  -2  -2  -1   25.34    0.59
   2   2   1   24.26    0.61
   2   2   1   24.04    0.59
  -2   2  -1   24.59    0.60
  -3  -2  -1  157.82    3.67
   3  -2   1  156.70    3.62
  -3  -2  -1  153.45    3.63
  -3  -2  -1  159.23    3.61
   3  -2   1  158.10    3.61
   3  -2   1  146.33    3.62
  -3   2  -1  154.06    3.63
   3   2   1  160.29    3.67
  -3   2  -1  152.90    3.63
   3   2   1  151.26    3.63
   3   2   1  151.01    3.62
  -3   2  -1  158.34    3.61
   4  -2   1    5.25    0.16
   4  -2   1    4.85    0.18
  -4  -2  -1    4.95    0.17
  -4  -2  -1    5.26    0.21
  -4  -2  -1    4.85    0.16
  -4   2  -1    5.10    0.15
   4   2   1    5.22    0.18
   4   2   1    5.11    0.17
   4   2   1    5.30    0.21
  -4   2  -1    4.84    0.18
  -4   2  -1    5.12    0.18
   5  -2   1    8.06    0.27
   5  -2   1    8.20    0.25
  -5  -2  -1    7.98    0.26
  -5  -2  -1    8.32    0.24
   5   2   1    8.85    0.31
   5   2   1    8.24    0.26
  -5   2  -1    8.13    0.26
  -5   2  -1    8.28    0.27
   5   2   1    8.22    0.26
  -6  -2  -1   25.70    0.66
  -6  -2  -1   25.40    0.69
   6  -2   1   24.89    0.70
   6  -2   1   26.00    0.67
  -6   2  -1   25.92    0.69
   6   2   1   25.66    0.69
   6   2   1   28.08    0.92
  -6   2  -1   24.91    0.69
   7  -2   1    2.53    0.16
   7  -2   1    2.49    0.13
  -7  -2  -1    2.42    0.13
  -7   2  -1    2.02    0.13
  -7   2  -1    2.54    0.14
   7   2   1    2.43    0.14
  -8  -2  -1   10.48    0.36
   8  -2   1   11.67    0.36
   8  -2   1   11.02    0.41
   8   2   1   11.06    0.38
  -8   2  -1   10.62    0.37
  -8   2  -1   11.22    0.37
   9  -2   1    0.71    0.10
  -9  -2  -1    0.56    0.09
   9  -2   1    0.76    0.12
   9  -2   1    0.76    0.10
  -9   2  -1    0.71    0.10
  -9   2  -1    0.79    0.10
   9   2   1    0.80    0.11
 -10  -2  -1    0.04    0.04
  10  -2   1   -0.06    0.05
  10  -2   1   -0.04    0.04
 -10   2  -1   -0.01    0.04
  10   2   1    0.07    0.05
  -9  -3   1    0.44    0.08
   9  -3  -1    0.32    0.08
   9  -3  -1    0.35    0.09
  -9   3   1    0.26    0.07
   9   3  -1    0.38    0.08
   8  -3  -1    0.36    0.08
  -8  -3   1    0.19    0.06
   8  -3  -1    0.33    0.08
   8   3  -1    0.13    0.06
  -8   3   1    0.43    0.08
   7  -3  -1    3.01    0.18
  -7  -3   1    3.44    0.17
   7  -3  -1    3.16    0.17
  -7   3   1    3.01    0.17
   7   3  -1    3.00    0.17
   6  -3  -1    1.95    0.14
   6  -3  -1    1.99    0.13
  -6  -3   1    2.01    0.12
   6   3  -1    1.77    0.12
  -6   3   1    1.95    0.12
  -5  -3   1   14.81    0.43
   5  -3  -1   14.97    0.44
   5  -3  -1   14.09    0.43
   5   3  -1   14.43    0.42
  -5   3   1   14.48    0.43
   5   3  -1   14.65    0.41
   4  -3  -1    7.31    0.25
  -4  -3   1    6.97    0.24
   4  -3  -1    6.88    0.24
  -4  -3   1    7.42    0.29
   4   3  -1    6.96    0.23
   4   3  -1    6.94    0.23
  -4   3   1    7.14    0.24
  -4   3   1    7.33    0.22
  -3  -3   1    0.21    0.03
   3  -3  -1    0.26    0.05
  -3  -3   1    0.23    0.05
   3  -3  -1    0.26    0.04
  -3  -3   1    0.21    0.04
   3   3  -1    0.20    0.04
  -3   3   1    0.22    0.04
   3   3  -1    0.18    0.03
  -3   3   1    0.20    0.04
  -2  -3   1    1.23    0.08
   2  -3  -1    1.09    0.07
  -2  -3   1    1.34    0.06
  -2  -3   1    1.28    0.09
  -2  -3   1    1.26    0.08
   2  -3  -1    1.35    0.08
  -2   3   1    1.22    0.07
   2   3  -1    1.26    0.06
   2   3  -1    1.04    0.08
  -2   3   1    1.27    0.08
  -1  -3   1    0.43    0.05
   1  -3  -1    0.38    0.05
  -1  -3   1    0.42    0.03
  -1  -3   1    0.38    0.05
   1  -3  -1    0.40    0.04
  -1  -3   1    0.39    0.05
  -1   3   1    0.40    0.05
  -1   3   1    0.42    0.05
   1   3  -1    0.32    0.05
   1   3  -1    0.48    0.03
   0  -3   1    5.93    0.17
   0  -3  -1    5.58    0.20
   0  -3  -1    5.88    0.18
   0  -3   1    5.69    0.19
   0   3   1    5.72    0.18
   0   3   1    5.33    0.19
   0   3  -1    5.63    0.19
   0   3  -1    6.08    0.16
   0   3  -1    5.73    0.18
  -1  -3  -1   28.69    0.69
   1  -3   1   28.55    0.70
  -1  -3  -1   27.85    0.71
  -1  -3  -1   27.86    0.71
  -1  -3  -1   28.35    0.74
   1  -3   1   28.39    0.71
   1   3   1   28.25    0.72
   1   3   1   28.89    0.68
  -1   3  -1   27.89    0.71
  -1   3  -1   26.83    0.71
  -1   3  -1   29.41    0.67
   2  -3   1   10.48    0.30
   2  -3   1   10.56    0.30
   2  -3   1   11.27    0.30
  -2  -3  -1   10.70    0.31
  -2  -3  -1   10.38    0.34
   2  -3   1   11.32    0.27
  -2  -3  -1   10.61    0.31
  -2  -3  -1   11.15    0.29
  -2   3  -1   10.79    0.31
  -2   3  -1   10.54    0.31
   2   3   1   10.87    0.29
   2   3   1   10.15    0.31
  -3  -3  -1   12.73    0.36
  -3  -3  -1   12.53    0.40
   3  -3   1   12.63    0.35
  -3  -3  -1   12.51    0.36
   3  -3   1   12.18    0.36
  -3  -3  -1   12.70    0.34
   3  -3   1   13.02    0.33
   3   3   1   12.50    0.36
  -3   3  -1   12.70    0.36
   3   3   1   12.93    0.35
  -3   3  -1   13.71    0.35
  -4  -3  -1    0.75    0.09
   4  -3   1    0.79    0.07
  -4  -3  -1    0.93    0.06
   4  -3   1    0.85    0.08
  -4  -3  -1    0.88    0.07
   4  -3   1    0.73    0.06
  -4   3  -1    0.90    0.08
   4   3   1    0.80    0.07
   4   3   1    0.80    0.07
  -4   3  -1    0.89    0.06
  -5  -3  -1   28.55    0.75
   5  -3   1   28.36    0.75
   5  -3   1   27.76    0.75
  -5   3  -1   28.93    0.76
   5   3   1   28.62    0.74
   5   3   1   28.65    0.74
   6  -3   1    4.15    0.19
  -6  -3  -1    3.91    0.18
   6  -3   1    3.89    0.19
  -6   3  -1    3.72    0.18
   6   3   1    4.17    0.18
  -7  -3  -1    9.33    0.33
   7  -3   1    8.95    0.35
   7  -3   1    9.90    0.34
  -7   3  -1    9.87    0.34
   7   3   1    9.42    0.33
  -8  -3  -1    0.27    0.07
   8  -3   1    0.28    0.08
   8  -3   1    0.19    0.07
  -8   3  -1    0.25    0.07
   8   3   1    0.27    0.07
   9  -3   1   -0.07    0.05
  -9  -3  -1    0.07    0.04
   9  -3   1   -0.03    0.05
   9   3   1    0.05    0.05
  -9   3  -1    0.04    0.04
   9  -4  -1    0.49    0.09
  -9  -4   1    0.36    0.08
   9  -4  -1    0.70    0.12
   9   4  -1    0.33    0.08
  -9   4   1    0.48    0.10
   8  -4  -1    0.41    0.08
   8  -4  -1    0.37    0.09
  -8  -4   1    0.43    0.08
   8   4  -1    0.22    0.06
  -8   4   1    0.44    0.08
  -7  -4   1    0.14    0.05
   7  -4  -1    0.11    0.06
   7  -4  -1    0.23    0.08
   7   4  -1    0.10    0.05
  -7   4   1    0.14    0.06
  -6  -4   1    0.07    0.05
   6  -4  -1    0.14    0.06
   6  -4  -1    0.07    0.05
   6   4  -1    0.11    0.04
  -6   4   1    0.12    0.05
   5  -4  -1    8.94    0.31
  -5  -4   1    8.18    0.30
   5  -4  -1    8.99    0.31
  -5   4   1    9.13    0.31
   5   4  -1    8.32    0.29
   5   4  -1    8.57    0.29
  -4  -4   1    0.61    0.10
   4  -4  -1    0.41    0.07
   4  -4  -1    0.51    0.07
  -4  -4   1    0.48    0.07
  -4   4   1    0.61    0.07
  -4   4   1    0.45    0.07
   4   4  -1    0.49    0.06
   4   4  -1    0.52    0.08
   3  -4  -1    0.28    0.05
  -3  -4   1    0.26    0.05
  -3  -4   1    0.19    0.07
   3  -4  -1    0.21    0.05
  -3  -4   1    0.27    0.05
   3   4  -1    0.21    0.06
  -3   4   1    0.21    0.05
   3   4  -1    0.13    0.04
  -3   4   1    0.18    0.04
  -2  -4   1    0.01    0.04
   2  -4  -1    0.05    0.03
   2  -4  -1    0.07    0.04
  -2  -4   1    0.04    0.03
  -2  -4   1    0.07    0.04
   2   4  -1    0.04    0.04
   2   4  -1    0.05    0.02
  -2   4   1   -0.02    0.03
  -2   4   1    0.05    0.03
  -1  -4   1    0.77    0.09
   1  -4  -1    0.92    0.08
  -1  -4   1    0.83    0.06
   1  -4  -1    0.75    0.06
  -1  -4   1    0.73    0.07
  -1  -4   1    0.89    0.08
  -1   4   1    0.89    0.07
  -1   4   1    0.76    0.08
   1   4  -1    0.87    0.09
   0  -4   1    0.71    0.05
   0  -4  -1    0.75    0.06
   0  -4  -1    0.85    0.09
   0   4   1    0.78    0.08
   0   4  -1    0.52    0.07
   0   4   1    0.76    0.07
   0   4  -1    0.73    0.07
  -1  -4  -1    9.63    0.30
  -1  -4  -1    9.91    0.28
   1  -4   1    9.64    0.28
   1  -4   1    9.54    0.30
  -1  -4  -1   10.28    0.33
  -1  -4  -1    9.73    0.30
  -1   4  -1    9.72    0.30
   1   4   1    9.01    0.31
  -1   4  -1    9.45    0.30
  -2  -4  -1    0.12    0.05
  -2  -4  -1    0.17    0.04
  -2  -4  -1    0.16    0.03
   2  -4   1    0.14    0.04
  -2  -4  -1    0.16    0.04
   2  -4   1    0.14    0.04
   2   4   1    0.11    0.05
  -2   4  -1    0.08    0.04
  -2   4  -1    0.07    0.04
  -3  -4  -1   28.13    0.78
   3  -4   1   25.98    0.72
  -3  -4  -1   27.77    0.73
  -3  -4  -1   27.64    0.73
   3  -4   1   27.95    0.72
   3   4   1   28.28    0.74
  -3   4  -1   27.30    0.73
  -3   4  -1   28.53    0.73
   3   4   1   28.15    0.70
   4  -4   1   35.92    0.94
   4  -4   1   35.31    0.94
  -4  -4  -1   37.98    1.01
  -4  -4  -1   35.62    0.94
   4   4   1   36.70    0.95
   4   4   1   36.57    0.92
  -4   4  -1   35.99    0.95
  -4   4  -1   39.07    0.96
   5  -4   1    0.02    0.04
  -5  -4  -1    0.23    0.06
   5  -4   1    0.18    0.05
   5   4   1    0.19    0.05
   5   4   1    0.24    0.05
  -5   4  -1    0.15    0.05
  -6  -4  -1    0.58    0.08
   6  -4   1    0.70    0.09
   6  -4   1    0.56    0.09
  -6   4  -1    0.62    0.08
   6   4   1    0.62    0.08
  -7  -4  -1    0.22    0.06
   7  -4   1    0.23    0.07
   7  -4   1    0.27    0.07
   7   4   1    0.31    0.06
  -7   4  -1    0.25    0.06
  -8  -4  -1    0.28    0.07
   8  -4   1    0.39    0.09
   8  -4   1    0.26    0.08
  -8   4  -1    0.32    0.07
   8   4   1    0.23    0.06
   9  -4   1    0.37    0.09
   9  -4   1    0.70    0.11
  -9  -4  -1    0.42    0.08
  -9   4  -1    0.58    0.10
   9   4   1    0.47    0.08
  -8  -5   1    0.94    0.12
   8  -5  -1    1.07    0.14
   8  -5  -1    0.95    0.14
  -8   5   1    1.05    0.13
   8   5  -1    0.94    0.11
  -7  -5   1    1.52    0.15
   7  -5  -1    1.58    0.17
   7  -5  -1    1.38    0.14
   7   5  -1    1.65    0.14
  -7   5   1    1.64    0.14
  -6  -5   1    0.99    0.12
   6  -5  -1    1.02    0.12
   6  -5  -1    1.10    0.13
  -6   5   1    0.99    0.12
   5  -5  -1    7.85    0.30
  -5  -5   1    8.22    0.31
   5  -5  -1    8.18    0.31
   5   5  -1    8.27    0.30
  -5   5   1    7.61    0.30
   4  -5  -1    2.36    0.14
   4  -5  -1    2.47    0.15
  -4  -5   1    2.28    0.17
  -4  -5   1    2.13    0.14
   4   5  -1    2.37    0.15
  -4   5   1    2.36    0.14
  -3  -5   1    5.03    0.21
   3  -5  -1    4.52    0.20
   3  -5  -1    4.79    0.21
  -3  -5   1    4.86    0.24
  -3  -5   1    4.69    0.21
  -3   5   1    4.93    0.21
   3   5  -1    4.84    0.22
  -3   5   1    5.26    0.21
  -2  -5   1   13.68    0.43
  -2  -5   1   14.52    0.47
   2  -5  -1   14.17    0.44
  -2  -5   1   14.15    0.43
   2  -5  -1   14.51    0.42
  -2   5   1   14.12    0.43
   2   5  -1   13.97    0.44
  -2   5   1   14.28    0.43
  -1  -5   1    3.56    0.17
  -1  -5   1    3.59    0.17
   1  -5  -1    3.65    0.18
  -1  -5   1    3.77    0.19
   1  -5  -1    3.66    0.15
  -1   5   1    3.61    0.17
  -1   5   1    3.61    0.18
   1   5  -1    3.49    0.18
   0  -5   1    4.63    0.21
   0  -5   1    4.50    0.20
   0  -5  -1    4.77    0.20
   0  -5  -1    4.73    0.21
   0  -5  -1    4.88    0.20
   0  -5   1    4.87    0.20
   0  -5   1    4.69    0.17
   0  -5  -1    4.79    0.18
   0   5  -1    4.58    0.20
   0   5   1    4.46    0.20
   1  -5   1    2.99    0.13
  -1  -5  -1    2.95    0.17
   1  -5   1    2.88    0.15
  -1  -5  -1    2.85    0.14
  -1  -5  -1    2.99    0.15
  -1  -5  -1    3.05    0.15
  -1   5  -1    2.95    0.16
  -1   5  -1    2.89    0.15
   1   5   1    2.99    0.16
   2  -5   1   13.39    0.40
   2  -5   1   13.31    0.42
  -2  -5  -1   13.47    0.42
  -2  -5  -1   13.33    0.42
  -2  -5  -1   14.14    0.47
   2   5   1   13.79    0.43
  -2   5  -1   13.47    0.42
  -2   5  -1   14.15    0.42
  -3  -5  -1    0.28    0.06
   3  -5   1    0.30    0.06
  -3  -5  -1    0.27    0.06
   3  -5   1    0.38    0.06
  -3  -5  -1    0.35    0.08
  -3   5  -1    0.38    0.06
  -3   5  -1    0.25    0.06
   3   5   1    0.35    0.07
   4  -5   1    0.04    0.04
  -4  -5  -1    0.06    0.04
  -4  -5  -1   -0.01    0.04
   4  -5   1    0.06    0.05
  -4   5  -1    0.08    0.04
   4   5   1   -0.01    0.04
   5  -5   1    0.10    0.05
   5  -5   1    0.22    0.06
  -5  -5  -1    0.21    0.06
  -5   5  -1    0.26    0.06
   5   5   1    0.19    0.06
   6  -5   1    1.45    0.14
   6  -5   1    1.45    0.13
  -6  -5  -1    1.50    0.12
  -6   5  -1    1.45    0.12
   7  -5   1   -0.01    0.05
  -7  -5  -1    0.01    0.03
   7  -5   1   -0.02    0.04
  -7   5  -1   -0.03    0.04
   8  -5   1    0.76    0.12
  -8  -5  -1    0.97    0.12
   8  -5   1    0.96    0.13
  -8   5  -1    0.65    0.10
   6  -6  -1    3.03    0.19
  -6  -6   1    3.08    0.19
   6  -6  -1    3.13    0.20
  -6   6   1    3.16    0.19
  -5  -6   1    0.06    0.05
   5  -6  -1    0.15    0.06
   5  -6  -1    0.00    0.05
   5   6  -1    0.14    0.06
  -5   6   1    0.04    0.04
   4  -6  -1    4.05    0.21
   4  -6  -1    3.61    0.19
  -4  -6   1    3.63    0.23
  -4  -6   1    3.62    0.20
  -4   6   1    3.74    0.19
   4   6  -1    3.73    0.21
  -3  -6   1    0.07    0.05
  -3  -6   1    0.07    0.06
  -3  -6   1    0.10    0.05
   3  -6  -1    0.05    0.04
   3  -6  -1    0.16    0.06
  -3   6   1    0.02    0.04
   3   6  -1    0.11    0.06
  -3   6   1    0.08    0.05
   2  -6  -1    0.00    0.04
  -2  -6   1    0.06    0.06
  -2  -6   1   -0.01    0.04
  -2  -6   1    0.02    0.04
   2  -6  -1    0.03    0.03
   2   6  -1    0.03    0.05
  -2   6   1    0.09    0.05
  -2   6   1   -0.02    0.04
   1  -6  -1    0.53    0.07
  -1  -6   1    0.38    0.08
  -1  -6   1    0.45    0.09
  -1  -6   1    0.52    0.09
   1   6  -1    0.49    0.09
  -1   6   1    0.35    0.08
  -1   6   1    0.50    0.08
   0  -6  -1    2.32    0.15
   0  -6   1    2.36    0.15
   0  -6   1    2.31    0.15
   0  -6  -1    2.23    0.15
   0  -6  -1    2.09    0.16
   0  -6   1    2.44    0.17
   0   6  -1    2.08    0.15
   0   6   1    2.27    0.15
  -1  -6  -1    1.52    0.16
   1  -6   1    1.56    0.13
   1  -6   1    1.70    0.13
   1  -6   1    1.57    0.13
  -1  -6  -1    1.67    0.13
  -1  -6  -1    1.74    0.13
   1   6   1    1.57    0.13
  -1   6  -1    1.44    0.13
  -2  -6  -1    1.66    0.13
   2  -6   1    1.66    0.11
  -2  -6  -1    1.83    0.18
   2  -6   1    1.60    0.13
  -2  -6  -1    1.78    0.13
  -2   6  -1    1.64    0.13
   2   6   1    1.62    0.13
  -2   6  -1    1.68    0.12
  -3  -6  -1    0.11    0.05
  -3  -6  -1    0.11    0.06
   3  -6   1    0.06    0.04
   3  -6   1    0.13    0.06
  -3  -6  -1    0.06    0.04
  -3   6  -1    0.03    0.04
  -3   6  -1    0.08    0.05
   3   6   1    0.08    0.05
  -4  -6  -1    0.21    0.07
   4  -6   1    0.22    0.07
  -4  -6  -1    0.19    0.07
   4  -6   1    0.19    0.06
  -4   6  -1    0.17    0.06
   4   6   1    0.16    0.06
  -5  -6  -1    5.61    0.25
   5  -6   1    5.75    0.25
   5  -6   1    5.42    0.25
  -5   6  -1    5.43    0.25
   5   6   1    5.48    0.26
   6  -6   1    0.04    0.05
  -6  -6  -1    0.03    0.05
   6  -6   1    0.09    0.06
  -6   6  -1    0.04    0.04
  -4  -7   1    0.25    0.07
   4  -7  -1    0.27    0.07
  -4  -7   1    0.21    0.07
   4  -7  -1    0.16    0.05
   4   7  -1    0.19    0.07
  -4   7   1    0.14    0.06
  -3  -7   1    0.34    0.08
   3  -7  -1    0.38    0.12
  -3  -7   1    0.57    0.09
  -3  -7   1    0.31    0.09
   3  -7  -1    0.56    0.10
  -3   7   1    0.53    0.08
  -3   7   1    0.38    0.08
   3   7  -1    0.42    0.09
  -2  -7   1    0.32    0.09
  -2  -7   1    0.19    0.07
  -2  -7   1    0.35    0.09
  -2   7   1    0.26    0.07
   2   7  -1    0.28    0.08
  -2   7   1    0.31    0.08
  -1  -7   1    2.45    0.17
   1  -7  -1    2.39    0.17
  -1  -7   1    2.27    0.16
   1  -7  -1    2.30    0.18
  -1  -7   1    2.23    0.18
   1  -7  -1    2.61    0.17
   1   7  -1    2.25    0.17
  -1   7   1    2.75    0.18
   0  -7  -1    0.30    0.09
   0  -7   1    0.24    0.07
   0  -7   1    0.29    0.08
   0  -7  -1    0.24    0.07
   0  -7   1    0.50    0.10
   0  -7  -1    0.30    0.08
   0   7  -1    0.31    0.08
   0   7   1    0.31    0.08
   1  -7   1    0.03    0.05
  -1  -7  -1   -0.03    0.05
   1  -7   1    0.06    0.05
  -1  -7  -1    0.00    0.04
   1  -7   1    0.09    0.06
  -1  -7  -1    0.05    0.05
   1   7   1    0.00    0.05
  -1   7  -1   -0.07    0.04
  -2  -7  -1    0.40    0.10
  -2  -7  -1    0.48    0.08
  -2  -7  -1    0.64    0.10
   2  -7   1    0.48    0.10
   2  -7   1    0.40    0.09
  -2   7  -1    0.27    0.07
   2   7   1    0.31    0.08
  -2   7  -1    0.47    0.09
  -3  -7  -1    0.09    0.06
  -3  -7  -1    0.09    0.05
  -3  -7  -1    0.07    0.06
   3  -7   1    0.05    0.06
  -3   7  -1    0.15    0.06
  -3   7  -1    0.17    0.05
   3   7   1    0.07    0.06
   4  -7   1    0.61    0.11
   4  -7   1    0.60    0.11
  -4  -7  -1    0.48    0.09
   4   7   1    0.74    0.12
  -4   7  -1    0.54    0.09
 -10   0   2    5.87    0.27
  10   0  -2    6.33    0.28
  -9   0   2    0.15    0.06
   9   0  -2    0.06    0.05
   9   0  -2    0.11    0.06
  -8   0   2    0.14    0.05
   8   0  -2    0.07    0.05
   8   0  -2    0.15    0.07
  -8   0   2    0.06    0.04
  -7   0   2    6.23    0.22
   7   0  -2    6.24    0.24
   7   0  -2    7.29    0.29
  -7   0   2    6.38    0.24
   6   0  -2    8.66    0.29
  -6   0   2    9.12    0.29
   6   0  -2    9.36    0.33
  -6   0   2    8.88    0.27
  -5   0   2   23.01    0.59
   5   0  -2   22.84    0.60
   5   0  -2   23.35    0.64
   4   0  -2    7.00    0.21
  -4   0   2    6.81    0.21
   4   0  -2    6.27    0.23
  -4   0   2    6.88    0.20
   3   0  -2   19.94    0.52
  -3   0   2   19.16    0.50
  -3   0   2   20.14    0.49
   3   0  -2   19.71    0.50
  -2   0   2  278.01    6.89
   2   0  -2  277.68    6.80
   2   0  -2  286.36    6.89
  -2   0   2  288.08    6.81
   2   0   2  243.26    5.92
  -2   0  -2  245.61    5.72
   2   0   2  239.73    5.82
  -2   0  -2  238.06    5.82
   3   0   2   86.57    2.05
  -3   0  -2   86.60    2.03
  -3   0  -2   85.29    2.03
   3   0   2   86.68    2.03
   4   0   2    3.27    0.14
  -4   0  -2    3.14    0.12
  -4   0  -2    3.43    0.12
   4   0   2    3.48    0.13
  -5   0  -2   16.95    0.45
  -5   0  -2   16.79    0.45
   5   0   2   16.69    0.46
   5   0   2   16.94    0.48
   6   0   2   33.31    0.87
  -6   0  -2   31.56    0.82
   6   0   2   31.92    0.83
  -6   0  -2   32.76    0.83
   7   0   2   41.47    1.11
  -7   0  -2   41.37    1.05
  -7   0  -2   41.85    1.06
   7   0   2   41.69    1.07
   8   0   2    0.23    0.06
  -8   0  -2    0.12    0.05
  -8   0  -2    0.24    0.05
   8   0   2    0.26    0.08
  -9   0  -2    0.01    0.04
   9   0   2   -0.04    0.05
   9   0   2   -0.04    0.04
  -9   0  -2   -0.05    0.03
 -10   0  -2    3.03    0.17
  10   0   2    3.02    0.19
  10   0   2    2.99    0.21
 -10   0  -2    3.44    0.18
 -10  -1   2    0.60    0.09
  10  -1  -2    0.66    0.09
  10  -1  -2    0.77    0.10
  10  -1  -2    0.58    0.11
 -10   1   2    0.67    0.10
  10   1  -2    0.75    0.11
   9  -1  -2    2.21    0.18
  -9  -1   2    2.11    0.15
   9  -1  -2    2.42    0.14
   9  -1  -2    2.48    0.15
  -9   1   2    2.27    0.15
   9   1  -2    2.15    0.15
   8  -1  -2    0.47    0.08
  -8  -1   2    0.52    0.08
   8  -1  -2    0.50    0.10
  -8   1   2    0.62    0.08
   8   1  -2    0.48    0.08
  -8   1   2    0.36    0.07
   7  -1  -2    1.91    0.12
   7  -1  -2    1.75    0.14
  -7  -1   2    1.92    0.12
  -7  -1   2    1.90    0.10
  -7   1   2    2.00    0.12
   7   1  -2    1.67    0.12
  -7   1   2    1.79    0.12
   7   1  -2    2.24    0.16
   6  -1  -2    1.98    0.14
   6  -1  -2    1.94    0.11
  -6  -1   2    2.08    0.11
  -6  -1   2    2.19    0.10
  -6   1   2    1.98    0.11
   6   1  -2    2.13    0.14
   6   1  -2    1.77    0.11
  -6   1   2    2.02    0.12
   5  -1  -2   13.02    0.39
   5  -1  -2   12.16    0.35
  -5  -1   2   12.08    0.33
  -5  -1   2   12.37    0.36
   5   1  -2   12.12    0.36
  -5   1   2   12.19    0.35
  -5   1   2   12.38    0.36
   5   1  -2   12.20    0.39
   4  -1  -2   17.62    0.45
  -4  -1   2   17.69    0.44
   4  -1  -2   15.44    0.47
  -4  -1   2   17.77    0.49
  -4  -1   2   16.67    0.46
   4   1  -2   16.64    0.48
  -4   1   2   17.65    0.45
   4   1  -2   18.24    0.43
   4   1  -2   16.97    0.46
  -4   1   2   17.17    0.46
  -3  -1   2  109.50    2.61
  -3  -1   2  108.26    2.64
   3  -1  -2  114.22    2.60
   3  -1  -2  108.51    2.62
  -3  -1   2  113.59    2.59
  -3   1   2  115.86    2.60
   3   1  -2  113.20    2.63
   3   1  -2  108.30    2.59
   3   1  -2  110.44    2.61
  -3   1   2  110.39    2.61
  -3   1   2  108.64    2.61
  -2  -1   2  104.68    2.48
  -2  -1   2  104.13    2.50
   2  -1  -2  106.55    2.49
   2  -1  -2  105.76    2.48
   2  -1  -2  106.79    2.46
   2   1  -2  105.53    2.48
  -2   1   2  104.67    2.46
   2   1  -2  112.02    2.47
  -2   1   2  102.07    2.47
  -1  -1   2   25.02    0.62
  -1  -1   2   24.49    0.61
   1  -1  -2   25.76    0.61
   1  -1  -2   24.80    0.61
  -1   1   2   25.12    0.61
  -1   1   2   25.44    0.60
   1   1  -2   24.60    0.60
   1   1  -2   25.24    0.61
   0  -1  -2  233.05    5.88
   0  -1   2  241.23    5.62
   0   1  -2  230.37    5.72
   0   1   2  241.97    5.82
   0   1   2  244.06    5.78
   0   1  -2  228.07    5.69
  -1  -1  -2   77.58    1.80
  -1  -1  -2   77.03    1.80
  -1  -1  -2   77.55    1.80
   1   1   2   76.55    1.80
  -1   1  -2   76.71    1.80
  -1   1  -2   75.62    1.80
   1   1   2   78.94    1.80
  -1   1  -2   76.03    1.79
  -1   1  -2   77.31    1.80
  -2  -1  -2    2.95    0.09
   2  -1   2    2.83    0.09
  -2  -1  -2    2.93    0.09
   2  -1   2    2.93    0.09
  -2   1  -2    2.88    0.10
   2   1   2    2.89    0.11
   2   1   2    2.87    0.10
  -2   1  -2    3.07    0.10
   2   1   2    2.98    0.09
  -3  -1  -2    4.81    0.15
  -3  -1  -2    4.74    0.14
   3  -1   2    4.54    0.15
   3  -1   2    4.55    0.14
   3   1   2    4.60    0.17
   3   1   2    4.73    0.15
  -3   1  -2    4.34    0.15
   3   1   2    4.77    0.14
  -3   1  -2    5.02    0.15
  -4  -1  -2    3.77    0.13
  -4  -1  -2    3.72    0.14
   4  -1   2    3.79    0.14
   4  -1   2    3.71    0.14
   4   1   2    4.11    0.12
  -4   1  -2    4.31    0.14
   4   1   2    3.77    0.16
   4   1   2    3.65    0.14
  -4   1  -2    3.76    0.14
  -5  -1  -2    6.52    0.21
  -5  -1  -2    6.34    0.20
   5  -1   2    6.49    0.23
   5  -1   2    6.60    0.21
  -5   1  -2    6.38    0.21
   5   1   2    6.30    0.21
   5   1   2    6.37    0.24
  -5   1  -2    5.97    0.21
   6  -1   2   16.74    0.47
   6  -1   2   16.67    0.50
  -6  -1  -2   17.05    0.47
  -6  -1  -2   16.47    0.46
   6   1   2   17.27    0.48
  -6   1  -2   16.60    0.47
   6   1   2   16.98    0.52
  -6   1  -2   16.86    0.47
   7  -1   2    9.13    0.34
  -7  -1  -2    9.56    0.30
  -7  -1  -2    9.45    0.30
   7  -1   2    9.13    0.31
   7   1   2    9.78    0.36
   7   1   2    9.39    0.31
  -7   1  -2    8.74    0.30
  -7   1  -2    9.39    0.31
  -8  -1  -2    0.00    0.03
   8  -1   2   -0.01    0.04
  -8  -1  -2    0.02    0.04
   8  -1   2    0.02    0.05
  -8   1  -2    0.07    0.05
  -8   1  -2    0.01    0.03
   8   1   2   -0.02    0.05
   8   1   2   -0.03    0.04
   9  -1   2    0.29    0.07
  -9  -1  -2    0.25    0.06
   9  -1   2    0.45    0.10
  -9   1  -2    0.51    0.09
  -9   1  -2    0.22    0.06
   9   1   2    0.28    0.07
 -10  -1  -2    0.08    0.04
  10  -1   2    0.04    0.05
  10  -1   2    0.03    0.05
 -10   1  -2    0.04    0.05
 -10   1  -2    0.08    0.06
  10   1   2    0.04    0.05
 -10  -2   2    0.02    0.03
  10  -2  -2    0.06    0.06
  10  -2  -2    0.04    0.04
 -10   2   2    0.05    0.05
  10   2  -2    0.11    0.06
  -9  -2   2    4.49    0.22
   9  -2  -2    5.12    0.27
   9  -2  -2    4.85    0.23
  -9   2   2    4.98    0.23
   9   2  -2    4.73    0.24
   8  -2  -2    8.26    0.29
  -8  -2   2    8.23    0.31
   8  -2  -2    8.63    0.36
   8  -2  -2    8.43    0.31
   8   2  -2    8.59    0.32
  -8   2   2    8.21    0.31
   7  -2  -2    0.20    0.08
  -7  -2   2    0.17    0.05
   7  -2  -2    0.10    0.04
   7  -2  -2    0.10    0.05
  -7   2   2    0.26    0.06
   7   2  -2    0.22    0.06
   6  -2  -2   50.67    1.22
  -6  -2   2   48.87    1.24
   6  -2  -2   51.88    1.25
   6  -2  -2   47.02    1.27
   6   2  -2   49.22    1.24
  -6   2   2   48.71    1.24
   5  -2  -2    1.66    0.10
  -5  -2   2    1.95    0.11
   5  -2  -2    1.89    0.09
   5  -2  -2    1.97    0.13
  -5  -2   2    2.03    0.08
   5   2  -2    1.87    0.11
  -5   2   2    1.76    0.10
   5   2  -2    1.87    0.09
  -4  -2   2   51.40    1.19
   4  -2  -2   48.47    1.24
  -4  -2   2   50.80    1.23
  -4  -2   2   48.90    1.27
   4  -2  -2   49.35    1.23
   4  -2  -2   49.69    1.20
  -4   2   2   51.12    1.19
   4   2  -2   48.88    1.22
   4   2  -2   51.23    1.26
   4   2  -2   51.45    1.21
  -4   2   2   49.67    1.23
  -3  -2   2   45.40    1.13
   3  -2  -2   45.33    1.14
  -3  -2   2   47.94    1.10
   3  -2  -2   45.16    1.13
   3  -2  -2   48.70    1.11
  -3  -2   2   44.05    1.17
   3   2  -2   49.16    1.13
  -3   2   2   45.75    1.14
   3   2  -2   45.91    1.13
   3   2  -2   47.61    1.16
  -3   2   2   47.79    1.12
  -2  -2   2    0.78    0.05
   2  -2  -2    0.75    0.06
   2  -2  -2    0.87    0.05
   2  -2  -2    0.88    0.04
  -2  -2   2    0.86    0.04
  -2  -2   2    0.87    0.07
  -2   2   2    0.86    0.05
   2   2  -2    0.87    0.05
   2   2  -2    0.76    0.05
  -2   2   2    0.87    0.05
  -1  -2   2    0.00    0.01
  -1  -2   2   -0.01    0.02
  -1  -2   2   -0.01    0.02
   1  -2  -2   -0.02    0.01
   1  -2  -2    0.00    0.02
  -1  -2   2    0.00    0.02
  -1   2   2    0.01    0.02
  -1   2   2   -0.01    0.02
   1   2  -2    0.00    0.01
   1   2  -2    0.02    0.02
   0  -2   2    4.60    0.14
   0  -2  -2    4.59    0.14
   0  -2   2    4.46    0.13
   0  -2  -2    4.74    0.16
   0   2   2    4.55    0.15
   0   2   2    4.53    0.14
   0   2  -2    4.80    0.13
  -1  -2  -2    5.14    0.15
   1  -2   2    5.01    0.14
   1  -2   2    4.98    0.14
  -1  -2  -2    5.10    0.15
  -1  -2  -2    5.03    0.17
  -1  -2  -2    5.23    0.15
   1  -2   2    5.01    0.15
  -1   2  -2    5.18    0.14
  -1   2  -2    5.16    0.16
   1   2   2    5.14    0.14
  -1   2  -2    5.18    0.16
   1   2   2    5.06    0.16
  -2  -2  -2   16.08    0.44
   2  -2   2   16.42    0.39
  -2  -2  -2   15.62    0.41
   2  -2   2   16.49    0.39
  -2  -2  -2   15.76    0.41
  -2  -2  -2   16.13    0.40
   2  -2   2   16.38    0.40
  -2   2  -2   16.06    0.41
  -2   2  -2   15.55    0.41
   2   2   2   15.73    0.40
   2   2   2   15.70    0.44
   2   2   2   15.75    0.42
  -2   2  -2   15.82    0.41
   3  -2   2    0.20    0.03
  -3  -2  -2    0.15    0.03
  -3  -2  -2    0.13    0.05
   3  -2   2    0.08    0.03
  -3  -2  -2    0.13    0.02
   3   2   2    0.09    0.03
  -3   2  -2    0.01    0.02
  -3   2  -2    0.08    0.03
  -3   2  -2    0.07    0.03
   3   2   2    0.14    0.04
   3   2   2    0.12    0.03
  -4  -2  -2    4.73    0.17
  -4  -2  -2    4.90    0.20
   4  -2   2    4.71    0.17
   4  -2   2    4.85    0.16
  -4  -2  -2    4.97    0.16
   4   2   2    4.71    0.20
  -4   2  -2    5.04    0.14
  -4   2  -2    4.91    0.17
  -4   2  -2    4.95    0.17
   4   2   2    4.72    0.17
   4   2   2    4.95    0.16
  -5  -2  -2    0.28    0.05
  -5  -2  -2    0.35    0.05
   5  -2   2    0.34    0.05
   5  -2   2    0.29    0.05
   5   2   2    0.22    0.06
   5   2   2    0.30    0.05
  -5   2  -2    0.33    0.05
  -5   2  -2    0.29    0.05
  -6  -2  -2    0.97    0.09
   6  -2   2    0.91    0.08
   6  -2   2    1.09    0.11
  -6  -2  -2    0.91    0.07
  -6   2  -2    1.02    0.09
   6   2   2    0.99    0.12
   6   2   2    0.93    0.09
  -6   2  -2    1.06    0.09
   7  -2   2    9.37    0.33
   7  -2   2    8.84    0.29
  -7  -2  -2    8.82    0.30
  -7  -2  -2    9.09    0.30
  -7   2  -2    8.74    0.31
   7   2   2    8.95    0.31
  -7   2  -2    8.79    0.31
  -8  -2  -2    1.25    0.11
   8  -2   2    1.42    0.11
   8  -2   2    1.89    0.16
  -8   2  -2    1.74    0.12
   8   2   2    1.49    0.12
  -8   2  -2    1.56    0.13
  -9  -2  -2    1.15    0.12
   9  -2   2    1.11    0.11
   9  -2   2    1.22    0.15
   9   2   2    1.41    0.14
  -9   2  -2    1.14    0.12
  -9   2  -2    1.13    0.13
  10  -2   2    0.28    0.07
 -10  -2  -2    0.31    0.06
  10  -2   2    0.31    0.09
  10   2   2    0.22    0.07
 -10   2  -2    0.21    0.06
   9  -3  -2    2.40    0.19
  -9  -3   2    2.48    0.16
   9  -3  -2    2.40    0.16
   9   3  -2    2.35    0.16
  -9   3   2    2.13    0.16
   8  -3  -2    0.29    0.08
   8  -3  -2    0.26    0.08
  -8  -3   2    0.27    0.07
   8   3  -2    0.38    0.08
  -8   3   2    0.30    0.07
  -7  -3   2   25.69    0.72
   7  -3  -2   26.06    0.75
   7  -3  -2   24.90    0.72
  -7   3   2   25.47    0.72
   7   3  -2   25.82    0.72
   6  -3  -2    2.96    0.17
  -6  -3   2    3.15    0.16
   6   3  -2    3.23    0.16
  -6   3   2    2.89    0.15
   5  -3  -2   35.76    0.93
  -5  -3   2   35.67    0.93
  -5  -3   2   38.59    0.99
   5  -3  -2   35.65    0.94
   5   3  -2   34.38    0.91
   5   3  -2   36.10    0.92
  -5   3   2   35.42    0.93
   4  -3  -2    1.39    0.09
   4  -3  -2    1.57    0.10
  -4  -3   2    1.60    0.13
  -4  -3   2    1.61    0.10
  -4   3   2    1.50    0.10
  -4   3   2    1.47    0.08
   4   3  -2    1.60    0.09
   4   3  -2    1.71    0.10
  -3  -3   2    0.76    0.09
   3  -3  -2    0.87    0.07
  -3  -3   2    0.93    0.05
  -3  -3   2    0.95    0.07
   3  -3  -2    0.83    0.07
  -3   3   2    0.79    0.06
   3   3  -2    0.89    0.06
   3   3  -2    0.78    0.07
  -3   3   2    0.96    0.07
   2  -3  -2   19.50    0.53
  -2  -3   2   20.24    0.53
   2  -3  -2   19.21    0.52
  -2  -3   2   20.32    0.53
  -2  -3   2   19.43    0.55
  -2  -3   2   21.75    0.50
  -2   3   2   20.46    0.53
  -2   3   2   20.23    0.53
   2   3  -2   20.36    0.54
   2   3  -2   19.95    0.51
  -1  -3   2   29.29    0.67
  -1  -3   2   27.57    0.71
   1  -3  -2   26.52    0.70
   1  -3  -2   27.54    0.69
  -1  -3   2   27.17    0.70
  -1  -3   2   26.70    0.70
  -1   3   2   27.75    0.70
  -1   3   2   28.14    0.70
   1   3  -2   28.68    0.67
   1   3  -2   26.14    0.70
   0  -3  -2   29.24    0.77
   0  -3   2   30.81    0.73
   0  -3   2   29.82    0.75
   0  -3  -2   29.96    0.74
   0   3  -2   29.55    0.76
   0   3   2   30.52    0.76
   0   3  -2   30.30    0.75
   0   3  -2   31.09    0.72
   0   3   2   30.07    0.75
   1  -3   2    0.03    0.02
  -1  -3  -2    0.13    0.03
  -1  -3  -2    0.04    0.03
  -1  -3  -2    0.03    0.03
   1  -3   2    0.04    0.02
   1  -3   2    0.05    0.02
  -1  -3  -2    0.05    0.02
  -1   3  -2    0.02    0.01
  -1   3  -2    0.04    0.02
   1   3   2    0.08    0.03
   1   3   2    0.04    0.01
  -1   3  -2    0.04    0.03
  -2  -3  -2   29.17    0.74
  -2  -3  -2   29.22    0.72
   2  -3   2   31.05    0.70
   2  -3   2   28.75    0.72
  -2  -3  -2   29.12    0.73
  -2  -3  -2   28.94    0.77
   2  -3   2   30.08    0.72
   2  -3   2   28.52    0.73
   2   3   2   27.60    0.74
  -2   3  -2   28.86    0.74
  -2   3  -2   29.16    0.73
   2   3   2   29.06    0.71
  -3  -3  -2    2.75    0.12
   3  -3   2    2.58    0.12
  -3  -3  -2    2.39    0.14
  -3  -3  -2    2.69    0.10
   3  -3   2    2.93    0.10
  -3  -3  -2    2.96    0.12
   3  -3   2    2.96    0.11
  -3   3  -2    2.76    0.12
  -3   3  -2    2.78    0.11
   3   3   2    2.80    0.11
   3   3   2    2.89    0.13
  -4  -3  -2    5.07    0.22
   4  -3   2    5.12    0.18
  -4  -3  -2    5.13    0.18
   4  -3   2    4.58    0.18
   4  -3   2    4.97    0.16
  -4  -3  -2    5.00    0.16
  -4   3  -2    4.93    0.17
   4   3   2    4.75    0.18
   4   3   2    5.13    0.18
  -4   3  -2    4.91    0.19
  -5  -3  -2   20.84    0.56
  -5  -3  -2   20.73    0.53
   5  -3   2   20.91    0.56
   5  -3   2   19.87    0.56
  -5   3  -2   20.19    0.56
   5   3   2   20.48    0.55
   5   3   2   19.30    0.54
   6  -3   2    3.23    0.16
  -6  -3  -2    3.16    0.15
   6  -3   2    2.93    0.16
  -6   3  -2    3.24    0.16
   6   3   2    3.23    0.16
  -7  -3  -2    0.76    0.09
   7  -3   2    0.51    0.09
   7  -3   2    0.59    0.09
   7   3   2    0.64    0.09
  -7   3  -2    0.64    0.09
  -8  -3  -2    0.01    0.03
   8  -3   2   -0.03    0.05
   8  -3   2   -0.02    0.04
  -8   3  -2   -0.07    0.03
   8   3   2   -0.01    0.04
   9  -3   2   -0.01    0.05
   9  -3   2    0.02    0.05
  -9  -3  -2   -0.02    0.03
   9   3   2   -0.06    0.04
  -9   3  -2    0.01    0.04
  -9  -4   2   -0.03    0.04
   9  -4  -2   -0.04    0.04
   9  -4  -2   -0.07    0.05
  -9   4   2   -0.03    0.03
   9   4  -2    0.09    0.05
   8  -4  -2    0.03    0.04
  -8  -4   2    0.00    0.04
   8  -4  -2    0.02    0.06
  -8   4   2    0.08    0.05
   8   4  -2   -0.01    0.04
  -7  -4   2    0.54    0.09
   7  -4  -2    0.62    0.09
   7  -4  -2    0.83    0.12
  -7   4   2    0.43    0.08
   7   4  -2    0.64    0.09
   6  -4  -2    3.64    0.20
   6  -4  -2    3.44    0.18
  -6  -4   2    3.51    0.18
   6   4  -2    3.69    0.17
  -6   4   2    3.56    0.18
  -5  -4   2    1.78    0.12
   5  -4  -2    1.67    0.13
  -5  -4   2    1.71    0.15
   5  -4  -2    2.00    0.13
   5   4  -2    1.70    0.11
  -5   4   2    1.82    0.12
   5   4  -2    1.71    0.11
   4  -4  -2    1.00    0.10
   4  -4  -2    1.24    0.10
  -4  -4   2    1.38    0.14
  -4  -4   2    1.07    0.10
   4   4  -2    1.15    0.08
  -4   4   2    0.99    0.08
   4   4  -2    1.03    0.09
  -4   4   2    1.22    0.10
  -3  -4   2    1.53    0.10
   3  -4  -2    1.45    0.11
   3  -4  -2    1.51    0.10
  -3  -4   2    1.55    0.10
  -3  -4   2    1.43    0.13
   3   4  -2    1.63    0.09
  -3   4   2    1.62    0.10
   3   4  -2    1.41    0.11
  -3   4   2    1.44    0.10
  -2  -4   2   29.94    0.77
  -2  -4   2   29.84    0.81
   2  -4  -2   29.31    0.78
  -2  -4   2   29.92    0.78
   2  -4  -2   30.22    0.77
   2   4  -2   30.55    0.74
  -2   4   2   30.48    0.77
  -2   4   2   30.06    0.77
   2   4  -2   27.26    0.78
  -1  -4   2    3.67    0.17
  -1  -4   2    3.75    0.13
  -1  -4   2    3.87    0.16
   1  -4  -2    3.65    0.14
  -1  -4   2    3.65    0.15
   1  -4  -2    3.70    0.17
   1   4  -2    3.44    0.16
  -1   4   2    3.69    0.15
  -1   4   2    3.85    0.16
   0  -4  -2    1.92    0.12
   0  -4   2    2.10    0.09
   0  -4   2    2.19    0.11
   0  -4  -2    2.08    0.10
   0  -4   2    2.05    0.11
   0   4  -2    2.22    0.12
   0   4   2    1.99    0.11
   0   4   2    1.97    0.10
  -1  -4  -2    7.76    0.28
  -1  -4  -2    7.82    0.23
  -1  -4  -2    7.92    0.25
   1  -4   2    7.73    0.24
  -1  -4  -2    7.75    0.25
   1  -4   2    7.29    0.25
  -1   4  -2    7.62    0.26
   1   4   2    7.96    0.26
   2  -4   2    1.51    0.09
  -2  -4  -2    1.55    0.08
  -2  -4  -2    1.58    0.10
  -2  -4  -2    1.38    0.12
  -2  -4  -2    1.52    0.09
   2  -4   2    1.48    0.09
  -2   4  -2    1.44    0.09
   2   4   2    1.55    0.11
  -2   4  -2    1.52    0.10
   3  -4   2    7.24    0.24
   3  -4   2    7.61    0.25
  -3  -4  -2    7.71    0.23
  -3  -4  -2    7.57    0.26
  -3  -4  -2    8.17    0.30
  -3  -4  -2    7.63    0.25
   3   4   2    7.59    0.27
   3   4   2    7.59    0.23
  -3   4  -2    7.40    0.25
  -3   4  -2    7.23    0.25
   4  -4   2    8.40    0.28
  -4  -4  -2    8.44    0.34
  -4  -4  -2    8.60    0.29
   4   4   2    8.64    0.29
  -4   4  -2    8.06    0.29
   4   4   2    9.09    0.27
   5  -4   2   10.25    0.34
   5  -4   2    9.72    0.32
  -5  -4  -2   10.23    0.33
  -5   4  -2    9.92    0.33
   5   4   2   10.11    0.33
   5   4   2   10.15    0.32
   6  -4   2    1.72    0.13
   6  -4   2    1.75    0.13
  -6  -4  -2    1.53    0.11
  -6   4  -2    1.52    0.12
   6   4   2    1.50    0.11
   7  -4   2   -0.04    0.04
   7  -4   2    0.08    0.06
  -7  -4  -2   -0.01    0.03
   7   4   2    0.01    0.04
  -7   4  -2    0.02    0.04
   8  -4   2    0.65    0.11
  -8  -4  -2    0.63    0.09
   8  -4   2    0.50    0.09
   8   4   2    0.69    0.10
  -8   4  -2    0.65    0.10
  -9  -4  -2    0.68    0.09
   9  -4   2    0.54    0.11
   9  -4   2    0.64    0.11
   9   4   2    0.53    0.09
  -9   4  -2    0.61    0.10
  -8  -5   2    0.02    0.04
   8  -5  -2    0.13    0.07
   8  -5  -2    0.03    0.06
   8   5  -2    0.12    0.04
  -8   5   2    0.00    0.04
  -7  -5   2    0.31    0.07
   7  -5  -2    0.36    0.08
   7  -5  -2    0.36    0.09
   7   5  -2    0.26    0.05
  -7   5   2    0.26    0.07
   6  -5  -2    0.26    0.07
  -6  -5   2    0.24    0.07
   6  -5  -2    0.35    0.08
  -6   5   2    0.26    0.07
   5  -5  -2    0.21    0.07
  -5  -5   2    0.13    0.06
   5  -5  -2    0.12    0.05
   5   5  -2    0.07    0.05
  -5   5   2    0.14    0.06
   4  -5  -2    0.14    0.05
  -4  -5   2    0.21    0.07
  -4  -5   2    0.18    0.06
   4  -5  -2    0.10    0.05
  -4   5   2    0.13    0.05
   4   5  -2    0.18    0.06
  -3  -5   2    0.46    0.08
   3  -5  -2    0.55    0.09
  -3  -5   2    0.57    0.09
   3  -5  -2    0.65    0.08
  -3  -5   2    0.49    0.09
  -3   5   2    0.58    0.08
  -3   5   2    0.50    0.08
   3   5  -2    0.50    0.08
  -2  -5   2    1.64    0.11
  -2  -5   2    1.52    0.11
   2  -5  -2    1.58    0.11
  -2  -5   2    1.50    0.13
   2  -5  -2    1.77    0.13
   2   5  -2    1.30    0.12
  -2   5   2    1.56    0.11
  -2   5   2    1.51    0.11
  -1  -5   2    4.40    0.20
  -1  -5   2    4.24    0.19
  -1  -5   2    4.01    0.19
   1  -5  -2    4.17    0.20
   1  -5  -2    4.29    0.17
  -1   5   2    4.14    0.18
   1   5  -2    4.21    0.20
  -1   5   2    4.16    0.19
   0  -5  -2    5.52    0.24
   0  -5   2    5.69    0.22
   0  -5   2    5.55    0.22
   0  -5  -2    5.74    0.22
   0  -5  -2    5.91    0.23
   0  -5   2    4.95    0.22
   0  -5  -2    5.84    0.20
   0   5   2    5.67    0.23
   0   5  -2    5.07    0.22
   1  -5   2    0.56    0.08
   1  -5   2    0.64    0.07
  -1  -5  -2    0.57    0.08
  -1  -5  -2    0.58    0.07
  -1  -5  -2    0.59    0.08
  -1  -5  -2    0.56    0.10
  -1   5  -2    0.46    0.08
   1   5   2    0.49    0.08
  -1   5  -2    0.48    0.07
  -2  -5  -2    3.08    0.15
   2  -5   2    2.88    0.14
   2  -5   2    3.32    0.16
  -2  -5  -2    3.29    0.16
  -2  -5  -2    3.10    0.19
   2   5   2    2.92    0.16
  -2   5  -2    3.22    0.16
  -2   5  -2    2.98    0.15
   3  -5   2    0.84    0.09
  -3  -5  -2    0.88    0.10
   3  -5   2    1.03    0.09
  -3  -5  -2    0.75    0.09
  -3  -5  -2    0.97    0.12
   3   5   2    0.76    0.10
  -3   5  -2    0.78    0.09
  -3   5  -2    1.00    0.10
  -4  -5  -2    7.52    0.28
   4  -5   2    7.80    0.28
  -4  -5  -2    7.50    0.33
   4  -5   2    7.49    0.27
  -4   5  -2    7.99    0.29
   4   5   2    7.41    0.29
   5  -5   2    3.52    0.18
   5  -5   2    3.69    0.18
  -5  -5  -2    3.83    0.19
   5   5   2    3.64    0.19
  -5   5  -2    3.72    0.19
   6  -5   2    0.16    0.06
   6  -5   2    0.17    0.06
  -6  -5  -2    0.11    0.05
  -6   5  -2    0.11    0.05
   7  -5   2    0.02    0.05
  -7  -5  -2   -0.04    0.03
   7  -5   2    0.06    0.06
  -7   5  -2    0.05    0.04
   8  -5   2    0.02    0.05
   8  -5   2    0.15    0.06
  -8  -5  -2    0.02    0.03
  -8   5  -2    0.00    0.05
  -6  -6   2    0.09    0.06
   6  -6  -2    0.10    0.06
   6  -6  -2    0.18    0.07
  -6   6   2    0.21    0.06
  -5  -6   2    1.31    0.14
   5  -6  -2    1.44    0.15
   5  -6  -2    1.65    0.14
  -5   6   2    1.54    0.15
   5   6  -2    1.61    0.14
   4  -6  -2    0.26    0.08
  -4  -6   2    0.34    0.09
  -4  -6   2    0.11    0.06
   4  -6  -2    0.13    0.05
   4   6  -2    0.18    0.06
  -4   6   2    0.17    0.06
   3  -6  -2    6.47    0.26
  -3  -6   2    6.56    0.27
  -3  -6   2    6.77    0.31
   3  -6  -2    6.94    0.29
  -3  -6   2    6.61    0.27
  -3   6   2    6.53    0.27
  -3   6   2    6.66    0.27
   3   6  -2    6.27    0.28
   2  -6  -2    0.80    0.11
  -2  -6   2    0.87    0.12
  -2  -6   2    0.77    0.10
   2  -6  -2    0.95    0.10
  -2  -6   2    0.84    0.11
   2   6  -2    0.93    0.12
  -2   6   2    0.90    0.11
  -2   6   2    0.92    0.11
  -1  -6   2    9.80    0.38
  -1  -6   2   10.11    0.36
  -1  -6   2   10.07    0.36
   1  -6  -2    9.85    0.33
  -1   6   2   10.36    0.35
   1   6  -2   10.00    0.37
  -1   6   2   10.97    0.37
   0  -6   2    1.00    0.11
   0  -6  -2    1.02    0.11
   0  -6   2    0.94    0.12
   0  -6  -2    1.11    0.12
   0  -6  -2    0.94    0.12
   0  -6   2    1.13    0.12
   0   6   2    1.05    0.12
   0   6  -2    0.92    0.11
  -1  -6  -2    0.65    0.09
  -1  -6  -2    0.61    0.10
   1  -6   2    0.80    0.10
   1  -6   2    0.61    0.09
  -1  -6  -2    0.83    0.10
   1  -6   2    0.69    0.10
  -1   6  -2    0.69    0.10
   1   6   2    0.65    0.10
  -2  -6  -2    0.00    0.05
  -2  -6  -2    0.00    0.04
   2  -6   2    0.03    0.04
   2  -6   2    0.02    0.05
  -2  -6  -2    0.03    0.04
   2   6   2    0.03    0.05
  -2   6  -2    0.02    0.04
  -2   6  -2    0.06    0.05
   3  -6   2    0.36    0.07
  -3  -6  -2    0.38    0.07
   3  -6   2    0.24    0.07
  -3  -6  -2    0.34    0.08
  -3  -6  -2    0.22    0.06
  -3   6  -2    0.34    0.07
   3   6   2    0.26    0.07
  -3   6  -2    0.24    0.06
  -4  -6  -2   -0.03    0.04
   4  -6   2    0.00    0.04
   4  -6   2   -0.04    0.04
  -4   6  -2   -0.02    0.04
   4   6   2   -0.05    0.04
   5  -6   2    0.01    0.04
   5  -6   2   -0.03    0.04
  -5  -6  -2    0.07    0.04
   5   6   2    0.11    0.05
  -5   6  -2    0.03    0.05
  -6  -6  -2    0.32    0.07
   6  -6   2    0.49    0.09
   6  -6   2    0.48    0.09
  -6   6  -2    0.36    0.08
  -4  -7   2    9.25    0.36
   4  -7  -2    8.79    0.38
  -4  -7   2    9.39    0.41
   4  -7  -2    9.18    0.35
  -4   7   2    9.36    0.36
   4   7  -2    9.09    0.37
   3  -7  -2    0.05    0.04
  -3  -7   2    0.14    0.06
  -3  -7   2    0.11    0.06
   3  -7  -2    0.16    0.07
  -3  -7   2    0.02    0.05
   3   7  -2    0.08    0.06
  -3   7   2    0.12    0.06
  -3   7   2    0.05    0.04
  -2  -7   2    4.68    0.24
  -2  -7   2    5.29    0.28
  -2  -7   2    5.42    0.26
  -2   7   2    5.73    0.26
   2   7  -2    5.45    0.27
  -2   7   2    5.36    0.25
  -1  -7   2   -0.03    0.04
   1  -7  -2   -0.01    0.04
   1  -7  -2   -0.06    0.04
  -1  -7   2    0.13    0.06
  -1  -7   2   -0.06    0.05
   1  -7  -2    0.03    0.05
   1   7  -2   -0.03    0.05
  -1   7   2   -0.02    0.05
   0  -7  -2   -0.03    0.05
   0  -7  -2    0.07    0.05
   0  -7  -2    0.08    0.05
   0  -7   2   -0.03    0.04
   0  -7   2   -0.06    0.04
   0  -7   2    0.02    0.05
   0   7   2    0.01    0.05
   0   7  -2    0.01    0.05
   1  -7   2    0.99    0.13
   1  -7   2    1.00    0.13
  -1  -7  -2    0.82    0.11
  -1  -7  -2    0.86    0.13
   1  -7   2    0.85    0.12
  -1  -7  -2    0.77    0.11
  -1   7  -2    0.82    0.12
   1   7   2    0.99    0.13
   2  -7   2    1.16    0.14
   2  -7   2    1.07    0.13
   2  -7   2    0.96    0.13
  -2  -7  -2    1.16    0.13
  -2  -7  -2    1.09    0.15
  -2  -7  -2    1.26    0.14
   2   7   2    1.35    0.16
  -2   7  -2    1.40    0.15
  -3  -7  -2    1.23    0.13
  -3  -7  -2    1.32    0.15
   3  -7   2    1.11    0.14
  -3  -7  -2    1.04    0.15
   3   7   2    1.33    0.15
  -3   7  -2    1.18    0.13
  -3   7  -2    1.29    0.11
   4  -7   2    0.15    0.07
  -4  -7  -2    0.05    0.05
  -4   7  -2    0.01    0.05
   4   7   2    0.11    0.06
 -10   0   3    0.05    0.05
  10   0  -3   -0.02    0.04
  -9   0   3    0.01    0.04
   9   0  -3    0.01    0.04
   8   0  -3    0.00    0.05
   8   0  -3    0.06    0.05
  -8   0   3   -0.01    0.03
  -8   0   3    0.01    0.04
   7   0  -3    0.04    0.06
  -7   0   3    0.03    0.04
   7   0  -3   -0.02    0.04
  -7   0   3    0.00    0.03
   6   0  -3    0.02    0.04
  -6   0   3   -0.01    0.03
   6   0  -3   -0.01    0.03
  -6   0   3    0.01    0.03
  -5   0   3    0.00    0.02
  -5   0   3   -0.03    0.02
   5   0  -3    0.00    0.03
   5   0  -3    0.00    0.03
   4   0  -3    0.02    0.03
  -4   0   3   -0.01    0.01
   4   0  -3    0.00    0.02
  -4   0   3   -0.02    0.02
  -4   0   3   -0.01    0.01
  -3   0   3   -0.04    0.01
  -3   0   3   -0.02    0.01
   3   0  -3    0.00    0.02
   3   0  -3   -0.02    0.02
   2   0  -3    0.00    0.01
  -2   0   3    0.00    0.01
   2   0  -3    0.00    0.02
  -2   0   3    0.01    0.01
  -1   0   3   -0.31    0.02
   1   0  -3   -0.36    0.01
   1   0   3    0.02    0.01
  -1   0  -3    0.01    0.01
  -1   0  -3    0.00    0.01
   2   0   3   -0.02    0.02
  -2   0  -3   -0.02    0.01
   2   0   3    0.00    0.02
  -2   0  -3   -0.03    0.01
  -3   0  -3   -0.01    0.01
   3   0   3   -0.03    0.02
   3   0   3   -0.02    0.02
  -3   0  -3   -0.04    0.01
   4   0   3   -0.01    0.03
  -4   0  -3    0.00    0.02
   4   0   3   -0.01    0.02
  -4   0  -3   -0.01    0.02
  -5   0  -3    0.02    0.02
   5   0   3   -0.02    0.03
   5   0   3   -0.02    0.02
  -5   0  -3   -0.01    0.02
   6   0   3    0.02    0.03
  -6   0  -3   -0.01    0.03
   6   0   3   -0.01    0.04
  -6   0  -3    0.00    0.03
  -7   0  -3   -0.01    0.03
  -7   0  -3    0.02    0.04
   7   0   3   -0.05    0.04
   7   0   3    0.00    0.05
  -8   0  -3    0.03    0.04
   8   0   3    0.00    0.04
   8   0   3    0.00    0.05
  -8   0  -3    0.01    0.04
   9   0   3   -0.02    0.04
  -9   0  -3    0.03    0.04
   9   0   3    0.01    0.05
  -9   0  -3   -0.02    0.04
 -10   0  -3    0.09    0.05
 -10   0  -3   -0.05    0.03
  10   0   3   -0.09    0.04
  10   0   3    0.02    0.05
  10  -1  -3    3.03    0.17
  10  -1  -3    2.82    0.23
 -10  -1   3    2.76    0.17
  10  -1  -3    2.73    0.17
 -10   1   3    2.57    0.17
  10   1  -3    2.64    0.18
   9  -1  -3    1.18    0.15
   9  -1  -3    1.24    0.11
  -9  -1   3    1.21    0.13
   9  -1  -3    1.26    0.12
  -9   1   3    1.31    0.13
   9   1  -3    1.30    0.14
   8  -1  -3    9.82    0.33
   8  -1  -3   10.29    0.39
  -8  -1   3    9.46    0.34
   8  -1  -3    9.61    0.33
  -8   1   3   10.07    0.34
   8   1  -3    9.84    0.35
   7  -1  -3    2.02    0.15
   7  -1  -3    2.17    0.12
  -7  -1   3    1.93    0.12
  -7   1   3    1.89    0.12
  -7   1   3    2.06    0.13
   7   1  -3    1.94    0.12
  -6  -1   3    2.86    0.12
   6  -1  -3    2.58    0.13
  -6  -1   3    2.83    0.14
   6  -1  -3    2.76    0.16
  -6   1   3    2.80    0.13
   6   1  -3    2.88    0.14
   6   1  -3    2.78    0.16
  -6   1   3    3.17    0.14
   5  -1  -3    1.63    0.09
   5  -1  -3    1.25    0.10
  -5  -1   3    1.50    0.07
  -5  -1   3    1.28    0.08
   5   1  -3    1.34    0.09
   5   1  -3    1.45    0.11
  -5   1   3    1.39    0.08
  -5   1   3    1.42    0.09
  -4  -1   3  137.58    3.27
   4  -1  -3  136.61    3.22
   4  -1  -3  137.15    3.26
  -4  -1   3  130.93    3.23
  -4  -1   3  137.64    3.21
   4   1  -3  137.03    3.23
   4   1  -3  131.88    3.27
   4   1  -3  147.94    3.21
  -4   1   3  136.15    3.23
  -4   1   3  140.22    3.19
  -4   1   3  138.34    3.24
   3  -1  -3   10.80    0.28
   3  -1  -3   10.80    0.31
  -3  -1   3   11.03    0.27
   3  -1  -3   10.59    0.29
  -3  -1   3   10.28    0.29
  -3  -1   3   10.45    0.32
  -3   1   3   10.71    0.27
   3   1  -3   11.12    0.32
   3   1  -3   10.69    0.28
   3   1  -3   10.13    0.29
  -3   1   3   10.78    0.29
   2  -1  -3  248.40    5.89
   2  -1  -3  242.39    5.80
   2  -1  -3  252.63    5.85
  -2  -1   3  246.87    5.95
  -2  -1   3  251.00    5.81
  -2   1   3  246.40    5.85
   2   1  -3  255.77    5.93
   2   1  -3  250.61    5.93
  -2   1   3  249.99    5.99
  -1  -1   3    2.92    0.09
   1  -1  -3    2.76    0.09
  -1  -1   3    3.03    0.10
   1  -1  -3    3.18    0.11
   1   1  -3    3.00    0.09
  -1   1   3    3.15    0.09
   1   1  -3    2.97    0.10
  -1   1   3    3.01    0.09
   0  -1  -3    3.35    0.11
   0  -1  -3    3.33    0.10
   0   1  -3    3.23    0.10
   0   1  -3    3.17    0.10
   0   1   3    3.24    0.10
   0   1  -3    3.14    0.09
   0   1   3    3.41    0.10
  -1  -1  -3   74.49    1.74
  -1  -1  -3   75.34    1.75
  -1  -1  -3   73.36    1.74
  -1   1  -3   74.43    1.75
   1   1   3   77.87    1.75
  -1   1  -3   76.16    1.75
   1   1   3   73.47    1.77
  -1   1  -3   72.28    1.74
   1   1   3   74.09    1.74
  -1   1  -3   75.78    1.75
  -2  -1  -3   19.14    0.47
   2  -1   3   19.06    0.46
  -2  -1  -3   19.61    0.48
   2  -1   3   19.61    0.48
   2  -1   3   19.55    0.46
   2   1   3   19.35    0.47
  -2   1  -3   18.95    0.48
   2   1   3   19.08    0.50
   2   1   3   19.15    0.48
  -2   1  -3   19.23    0.47
  -2   1  -3   19.27    0.48
   3  -1   3   22.16    0.55
   3  -1   3   19.41    0.54
  -3  -1  -3   21.89    0.55
  -3  -1  -3   22.37    0.55
   3   1   3   22.60    0.58
   3   1   3   21.59    0.55
   3   1   3   23.27    0.54
  -3   1  -3   22.12    0.55
  -3   1  -3   22.68    0.55
   4  -1   3    9.90    0.29
  -4  -1  -3   10.26    0.28
  -4  -1  -3   10.23    0.29
   4  -1   3   10.41    0.30
  -4   1  -3   10.41    0.29
   4   1   3   10.40    0.27
  -4   1  -3   10.20    0.29
   4   1   3    9.99    0.32
   5  -1   3    0.14    0.04
   5  -1   3    0.29    0.05
  -5  -1  -3    0.24    0.04
  -5  -1  -3    0.18    0.04
   5   1   3    0.16    0.05
   5   1   3    0.16    0.04
  -5   1  -3    0.19    0.04
  -5   1  -3    0.15    0.03
  -6  -1  -3    0.08    0.03
  -6  -1  -3    0.01    0.03
   6  -1   3    0.03    0.04
   6  -1   3    0.09    0.05
  -6   1  -3   -0.01    0.03
   6   1   3    0.04    0.05
  -6   1  -3    0.02    0.03
   6   1   3    0.08    0.04
   7  -1   3    0.17    0.06
  -7  -1  -3    0.22    0.05
   7  -1   3    0.14    0.05
  -7  -1  -3    0.21    0.05
  -7   1  -3    0.13    0.05
   7   1   3    0.25    0.06
  -7   1  -3    0.21    0.05
   7   1   3    0.18    0.07
   8  -1   3    4.47    0.24
  -8  -1  -3    4.55    0.19
  -8  -1  -3    4.70    0.20
   8  -1   3    4.61    0.20
   8   1   3    4.58    0.21
  -8   1  -3    4.71    0.21
   8   1   3    4.58    0.25
  -8   1  -3    4.79    0.20
  -9  -1  -3    5.73    0.25
   9  -1   3    5.81    0.25
   9  -1   3    6.19    0.30
  -9  -1  -3    5.82    0.24
   9   1   3    5.77    0.26
  -9   1  -3    5.78    0.25
  -9   1  -3    6.06    0.25
  10  -1   3    0.04    0.05
  10  -1   3    0.09    0.06
 -10  -1  -3    0.06    0.04
 -10   1  -3    0.02    0.04
  10   1   3    0.03    0.05
 -10   1  -3    0.02    0.05
 -10  -2   3    0.20    0.06
  10  -2  -3    0.00    0.05
  10  -2  -3    0.07    0.06
  10   2  -3    0.08    0.06
 -10   2   3    0.09    0.05
   9  -2  -3    1.68    0.13
   9  -2  -3    1.80    0.19
  -9  -2   3    1.92    0.14
   9   2  -3    1.57    0.16
  -9   2   3    1.40    0.14
   8  -2  -3    0.77    0.12
   8  -2  -3    0.92    0.10
  -8  -2   3    0.89    0.10
   8  -2  -3    0.89    0.11
   8   2  -3    0.93    0.11
  -8   2   3    0.92    0.11
   7  -2  -3    0.42    0.08
  -7  -2   3    0.49    0.07
   7  -2  -3    0.53    0.07
   7  -2  -3    0.46    0.08
   7   2  -3    0.43    0.07
  -7   2   3    0.48    0.08
   6  -2  -3    0.37    0.06
   6  -2  -3    0.34    0.06
  -6  -2   3    0.41    0.07
   6  -2  -3    0.35    0.07
  -6   2   3    0.44    0.07
   6   2  -3    0.46    0.07
   5  -2  -3   26.69    0.76
   5  -2  -3   28.44    0.71
  -5  -2   3   27.73    0.73
   5  -2  -3   28.19    0.73
  -5  -2   3   28.90    0.79
  -5   2   3   28.33    0.74
   5   2  -3   28.70    0.71
   5   2  -3   28.01    0.73
   4  -2  -3    0.89    0.08
  -4  -2   3    0.94    0.05
   4  -2  -3    0.99    0.07
   4  -2  -3    0.96    0.06
  -4  -2   3    1.07    0.08
   4   2  -3    0.83    0.07
   4   2  -3    0.98    0.08
  -4   2   3    1.07    0.05
  -4   2   3    1.01    0.07
   4   2  -3    1.05    0.07
  -3  -2   3   15.40    0.36
  -3  -2   3   14.38    0.42
   3  -2  -3   14.16    0.39
  -3  -2   3   14.21    0.39
   3  -2  -3   15.66    0.37
   3  -2  -3   14.60    0.41
   3   2  -3   14.57    0.39
   3   2  -3   14.09    0.39
  -3   2   3   14.62    0.38
  -3   2   3   13.70    0.39
  -2  -2   3    0.79    0.06
   2  -2  -3    0.74    0.06
  -2  -2   3    0.79    0.07
   2  -2  -3    0.82    0.06
  -2   2   3    0.88    0.05
   2   2  -3    0.88    0.06
   2   2  -3    0.74    0.05
  -2   2   3    0.88    0.06
   1  -2  -3    0.40    0.05
   1  -2  -3    0.32    0.04
  -1  -2   3    0.41    0.04
  -1  -2   3    0.35    0.04
  -1  -2   3    0.36    0.04
  -1   2   3    0.31    0.03
   1   2  -3    0.37    0.04
  -1   2   3    0.30    0.04
   1   2  -3    0.38    0.03
   0  -2  -3   12.80    0.36
   0  -2   3   13.16    0.33
   0  -2   3   13.44    0.32
   0  -2  -3   12.76    0.34
   0   2  -3   13.54    0.33
   0   2  -3   12.61    0.35
   0   2   3   12.84    0.34
   0   2   3   13.14    0.35
   0   2  -3   13.01    0.34
  -1  -2  -3   19.75    0.53
  -1  -2  -3   20.55    0.50
  -1  -2  -3   20.11    0.50
  -1  -2  -3   20.12    0.50
   1   2   3   19.36    0.51
  -1   2  -3   19.75    0.50
  -1   2  -3   20.28    0.50
   1   2   3   20.29    0.48
  -1   2  -3   20.47    0.49
  -1   2  -3   19.47    0.51
  -2  -2  -3    3.74    0.13
  -2  -2  -3    3.54    0.12
  -2  -2  -3    3.89    0.12
  -2  -2  -3    4.01    0.16
  -2   2  -3    3.59    0.13
   2   2   3    3.84    0.15
   2   2   3    3.83    0.13
   2   2   3    3.80    0.12
  -2   2  -3    3.81    0.11
  -2   2  -3    3.53    0.12
  -2   2  -3    3.86    0.12
   3  -2   3   35.25    0.87
  -3  -2  -3   36.40    0.93
  -3  -2  -3   35.41    0.89
  -3  -2  -3   36.94    0.88
   3  -2   3   36.81    0.88
   3  -2   3   36.80    0.87
  -3   2  -3   36.43    0.90
   3   2   3   36.45    0.93
  -3   2  -3   37.66    0.88
  -3   2  -3   35.87    0.89
   3   2   3   34.65    0.89
   3   2   3   37.17    0.89
  -4  -2  -3    1.63    0.08
   4  -2   3    1.28    0.08
  -4  -2  -3    1.48    0.07
   4  -2   3    1.48    0.08
  -4   2  -3    1.39    0.08
   4   2   3    1.62    0.08
   4   2   3    1.57    0.11
   4   2   3    1.43    0.08
  -4   2  -3    1.51    0.06
  -5  -2  -3    0.21    0.04
   5  -2   3    0.09    0.04
  -5  -2  -3    0.12    0.03
   5  -2   3    0.13    0.04
   5   2   3    0.11    0.05
  -5   2  -3    0.17    0.04
   5   2   3    0.15    0.04
  -5   2  -3    0.09    0.04
  -6  -2  -3    2.20    0.11
  -6  -2  -3    2.09    0.11
   6  -2   3    2.08    0.13
   6  -2   3    2.36    0.12
   6   2   3    1.96    0.12
  -6   2  -3    2.33    0.12
  -6   2  -3    2.00    0.12
   6   2   3    1.92    0.15
   7  -2   3    0.16    0.06
  -7  -2  -3    0.16    0.04
   7  -2   3    0.17    0.05
  -7  -2  -3    0.15    0.05
  -7   2  -3    0.11    0.05
   7   2   3    0.17    0.05
  -7   2  -3    0.10    0.04
   8  -2   3    0.72    0.11
   8  -2   3    0.57    0.08
  -8  -2  -3    0.74    0.09
  -8   2  -3    0.65    0.09
   8   2   3    0.80    0.10
  -8   2  -3    0.67    0.09
   9  -2   3   -0.02    0.05
  -9  -2  -3    0.05    0.04
   9  -2   3    0.01    0.04
   9   2   3   -0.04    0.04
  -9   2  -3   -0.04    0.04
  -9   2  -3    0.14    0.06
 -10  -2  -3    0.79    0.10
  10  -2   3    0.95    0.15
  10   2   3    0.86    0.12
 -10   2  -3    0.88    0.12
 -10   2  -3    0.65    0.11
   9  -3  -3    0.11    0.07
   9  -3  -3    0.14    0.06
  -9  -3   3    0.18    0.06
  -9   3   3    0.25    0.07
   9   3  -3    0.22    0.07
   8  -3  -3    2.83    0.20
   8  -3  -3    2.87    0.17
  -8  -3   3    2.70    0.17
   8   3  -3    2.57    0.16
  -8   3   3    2.67    0.17
  -7  -3   3    8.43    0.31
   7  -3  -3    7.72    0.30
   7  -3  -3    8.06    0.33
  -7   3   3    8.51    0.31
   7   3  -3    8.29    0.30
   6  -3  -3    0.70    0.09
  -6  -3   3    0.65    0.08
   6  -3  -3    0.62    0.10
  -6   3   3    0.67    0.09
   6   3  -3    0.75    0.09
   5  -3  -3    3.98    0.19
  -5  -3   3    3.79    0.17
  -5  -3   3    3.81    0.21
   5   3  -3    4.09    0.17
   5   3  -3    4.19    0.17
  -5   3   3    4.15    0.18
   4  -3  -3    3.65    0.15
  -4  -3   3    3.56    0.15
  -4  -3   3    3.19    0.18
   4  -3  -3    3.34    0.16
   4   3  -3    3.46    0.14
  -4   3   3    3.42    0.15
  -4   3   3    3.66    0.13
   4   3  -3    3.78    0.15
  -3  -3   3    1.98    0.10
  -3  -3   3    1.92    0.12
   3  -3  -3    2.22    0.12
   3  -3  -3    1.98    0.10
   3   3  -3    2.11    0.10
   3   3  -3    2.21    0.11
  -3   3   3    2.06    0.10
  -3   3   3    2.00    0.10
  -2  -3   3    0.78    0.04
   2  -3  -3    0.72    0.07
  -2  -3   3    0.65    0.06
  -2  -3   3    0.79    0.06
   2  -3  -3    0.84    0.06
  -2  -3   3    0.73    0.08
  -2   3   3    0.76    0.06
  -2   3   3    0.73    0.06
   2   3  -3    0.82    0.05
   2   3  -3    0.67    0.07
  -1  -3   3    4.35    0.16
   1  -3  -3    4.41    0.17
   1  -3  -3    4.63    0.15
  -1  -3   3    4.66    0.13
  -1  -3   3    4.01    0.16
  -1  -3   3    4.22    0.16
  -1   3   3    4.41    0.16
  -1   3   3    4.48    0.15
   1   3  -3    4.10    0.16
   1   3  -3    4.41    0.14
   0  -3  -3   15.06    0.42
   0  -3  -3   14.58    0.39
   0  -3   3   15.27    0.38
   0   3   3   14.86    0.40
   0   3   3   13.70    0.41
   0   3  -3   15.61    0.38
   0   3  -3   15.01    0.40
   0   3  -3   14.81    0.41
  -1  -3  -3    2.16    0.10
   1  -3   3    2.11    0.09
   1  -3   3    2.16    0.08
  -1  -3  -3    2.16    0.10
  -1  -3  -3    2.34    0.09
  -1  -3  -3    2.19    0.12
   1  -3   3    2.32    0.09
  -1   3  -3    2.12    0.10
  -1   3  -3    2.25    0.08
   1   3   3    2.26    0.07
   1   3   3    2.12    0.11
  -1   3  -3    2.21    0.10
  -2  -3  -3   14.00    0.42
  -2  -3  -3   13.83    0.38
   2  -3   3   14.34    0.35
   2  -3   3   13.84    0.38
  -2  -3  -3   13.49    0.38
   2  -3   3   13.83    0.36
  -2  -3  -3   13.58    0.37
  -2   3  -3   13.75    0.38
  -2   3  -3   14.14    0.35
   2   3   3   13.56    0.39
  -2   3  -3   13.86    0.38
   2   3   3   13.91    0.36
   3  -3   3    7.14    0.20
   3  -3   3    7.21    0.21
  -3  -3  -3    7.37    0.21
  -3  -3  -3    7.30    0.23
  -3  -3  -3    7.09    0.23
  -3  -3  -3    7.21    0.27
   3  -3   3    6.77    0.21
  -3   3  -3    7.37    0.22
   3   3   3    6.45    0.23
   3   3   3    7.12    0.21
  -3   3  -3    6.89    0.23
   4  -3   3    0.01    0.02
   4  -3   3    0.03    0.03
  -4  -3  -3    0.04    0.03
  -4  -3  -3    0.01    0.02
  -4  -3  -3    0.00    0.04
  -4   3  -3   -0.01    0.03
  -4   3  -3    0.00    0.02
   4   3   3    0.00    0.03
   4   3   3    0.00    0.03
  -4   3  -3    0.02    0.03
   5  -3   3    2.73    0.13
   5  -3   3    2.80    0.12
  -5  -3  -3    2.49    0.13
  -5  -3  -3    2.65    0.12
  -5   3  -3    2.59    0.13
   5   3   3    2.69    0.13
  -5   3  -3    2.64    0.14
   5   3   3    2.63    0.13
   6  -3   3    0.03    0.04
  -6  -3  -3    0.02    0.03
  -6   3  -3    0.05    0.04
   6   3   3   -0.02    0.03
  -6   3  -3    0.03    0.04
  -7  -3  -3    1.10    0.11
   7  -3   3    1.00    0.11
  -7   3  -3    1.18    0.12
   7   3   3    1.08    0.11
  -7   3  -3    1.00    0.11
   8  -3   3    1.14    0.13
   8  -3   3    0.98    0.13
  -8  -3  -3    1.37    0.11
   8   3   3    1.29    0.13
  -8   3  -3    1.12    0.12
  -9  -3  -3    0.08    0.04
   9  -3   3    0.19    0.08
   9  -3   3    0.06    0.06
   9   3   3    0.03    0.05
  -9   3  -3    0.15    0.05
   9  -4  -3    1.28    0.14
  -9  -4   3    1.26    0.14
   9  -4  -3    1.43    0.18
   9   4  -3    1.28    0.14
  -9   4   3    1.44    0.15
   8  -4  -3    0.20    0.08
  -8  -4   3    0.11    0.05
   8  -4  -3    0.13    0.06
  -8   4   3    0.08    0.05
   8   4  -3    0.11    0.05
   7  -4  -3    1.86    0.14
  -7  -4   3    1.61    0.13
   7  -4  -3    1.74    0.15
   7   4  -3    1.40    0.11
  -7   4   3    1.36    0.13
   6  -4  -3    2.90    0.18
   6  -4  -3    3.28    0.17
  -6  -4   3    3.46    0.18
   6   4  -3    3.19    0.16
  -6   4   3    2.75    0.16
  -5  -4   3    0.61    0.10
  -5  -4   3    0.49    0.08
   5  -4  -3    0.57    0.08
   5  -4  -3    0.47    0.08
   5   4  -3    0.55    0.07
  -5   4   3    0.58    0.08
   5   4  -3    0.52    0.07
  -4  -4   3    1.09    0.13
   4  -4  -3    1.11    0.09
  -4  -4   3    1.04    0.10
   4  -4  -3    1.19    0.10
   4   4  -3    0.95    0.08
   4   4  -3    0.88    0.09
  -4   4   3    1.12    0.08
  -4   4   3    1.10    0.09
   3  -4  -3    0.55    0.08
  -3  -4   3    0.51    0.07
   3  -4  -3    0.56    0.07
  -3  -4   3    0.70    0.08
  -3  -4   3    0.52    0.09
  -3   4   3    0.65    0.07
  -3   4   3    0.53    0.07
   3   4  -3    0.54    0.07
   3   4  -3    0.54    0.06
   2  -4  -3    3.75    0.17
   2  -4  -3    3.52    0.15
  -2  -4   3    3.83    0.18
  -2  -4   3    3.84    0.16
  -2  -4   3    3.96    0.16
   2   4  -3    3.83    0.17
  -2   4   3    3.92    0.16
   2   4  -3    3.68    0.13
  -2   4   3    3.50    0.15
  -1  -4   3    1.43    0.09
   1  -4  -3    1.36    0.10
  -1  -4   3    1.53    0.09
  -1  -4   3    1.42    0.09
   1  -4  -3    1.53    0.09
  -1  -4   3    1.38    0.10
  -1   4   3    1.55    0.10
   1   4  -3    1.47    0.07
  -1   4   3    1.49    0.09
   1   4  -3    1.42    0.10
   0  -4   3    2.70    0.13
   0  -4  -3    2.72    0.15
   0  -4  -3    2.76    0.12
   0  -4   3    2.49    0.13
   0  -4   3    2.87    0.11
   0  -4   3    2.56    0.13
   0   4   3    2.63    0.13
   0   4   3    2.76    0.12
   0   4  -3    2.81    0.14
  -1  -4  -3    0.07    0.03
  -1  -4  -3    0.05    0.03
   1  -4   3    0.04    0.03
   1  -4   3    0.06    0.03
  -1  -4  -3    0.01    0.02
  -1  -4  -3    0.04    0.04
   1   4   3    0.01    0.03
  -1   4  -3    0.03    0.03
  -1   4  -3    0.01    0.03
  -2  -4  -3   38.75    0.93
   2  -4   3   36.59    0.93
  -2  -4  -3   36.59    0.95
  -2  -4  -3   38.43    1.00
  -2  -4  -3   37.88    0.95
   2  -4   3   37.04    0.94
  -2   4  -3   36.36    0.95
   2   4   3   37.41    0.97
  -2   4  -3   39.38    0.96
   3  -4   3    0.10    0.04
   3  -4   3    0.03    0.03
  -3  -4  -3    0.09    0.04
  -3  -4  -3    0.06    0.03
  -3  -4  -3    0.10    0.04
  -3  -4  -3    0.08    0.05
  -3   4  -3    0.01    0.04
   3   4   3    0.04    0.04
  -3   4  -3   -0.02    0.03
   3   4   3    0.03    0.02
  -4  -4  -3    1.58    0.10
   4  -4   3    1.22    0.10
  -4  -4  -3    1.52    0.14
   4   4   3    1.32    0.09
  -4   4  -3    1.37    0.10
   4   4   3    1.47    0.11
   5  -4   3    0.50    0.07
  -5  -4  -3    0.65    0.08
   5  -4   3    0.55    0.08
   5   4   3    0.61    0.08
  -5   4  -3    0.60    0.08
   5   4   3    0.68    0.08
   6  -4   3    1.51    0.12
   6  -4   3    1.39    0.11
  -6  -4  -3    1.41    0.11
  -6   4  -3    1.43    0.11
   6   4   3    1.40    0.10
   7  -4   3    0.11    0.06
   7  -4   3    0.04    0.05
  -7  -4  -3    0.14    0.05
  -7   4  -3    0.08    0.04
   7   4   3    0.08    0.05
   8  -4   3    1.30    0.15
  -8  -4  -3    1.21    0.12
   8  -4   3    1.40    0.15
   8   4   3    1.29    0.13
  -8   4  -3    1.06    0.12
  -9  -4  -3    0.09    0.04
   9  -4   3    0.12    0.07
   9  -4   3    0.07    0.07
  -9   4  -3    0.11    0.05
   9   4   3    0.14    0.06
  -8  -5   3    1.65    0.14
   8  -5  -3    1.56    0.18
   8  -5  -3    1.51    0.16
   8   5  -3    1.67    0.12
  -8   5   3    1.75    0.14
   7  -5  -3    3.05    0.21
   7  -5  -3    3.26    0.20
  -7  -5   3    3.18    0.18
  -7   5   3    3.49    0.19
   7   5  -3    3.52    0.18
   6  -5  -3    1.41    0.14
   6  -5  -3    1.61    0.15
  -6  -5   3    1.60    0.13
  -6   5   3    1.23    0.13
   6   5  -3    1.58    0.11
  -5  -5   3    2.10    0.17
   5  -5  -3    1.98    0.15
   5  -5  -3    2.07    0.14
  -5  -5   3    2.02    0.14
  -5   5   3    2.09    0.14
   5   5  -3    2.09    0.14
  -4  -5   3    0.11    0.05
   4  -5  -3    0.14    0.06
   4  -5  -3    0.08    0.05
  -4  -5   3   -0.01    0.05
  -4   5   3    0.11    0.05
   4   5  -3    0.11    0.05
   3  -5  -3    0.04    0.04
   3  -5  -3   -0.03    0.04
  -3  -5   3   -0.05    0.04
  -3  -5   3    0.03    0.04
  -3  -5   3    0.11    0.05
   3   5  -3    0.04    0.04
  -3   5   3    0.00    0.03
  -3   5   3    0.00    0.04
   2  -5  -3    5.30    0.20
  -2  -5   3    5.15    0.21
   2  -5  -3    4.76    0.22
  -2  -5   3    5.06    0.24
  -2  -5   3    5.05    0.21
   2   5  -3    4.73    0.22
  -2   5   3    4.93    0.20
  -2   5   3    5.41    0.22
  -1  -5   3   38.58    1.00
   1  -5  -3   39.17    1.02
   1  -5  -3   38.51    0.98
  -1  -5   3   37.40    1.01
  -1  -5   3   37.64    1.00
  -1   5   3   38.03    0.99
   1   5  -3   40.17    1.02
  -1   5   3   37.89    1.00
   0  -5  -3    4.75    0.19
   0  -5  -3    4.35    0.17
   0  -5  -3    4.30    0.21
   0  -5   3    4.47    0.20
   0  -5   3    4.49    0.19
   0  -5   3    4.51    0.19
   0  -5  -3    4.49    0.19
   0   5   3    4.12    0.19
   0   5  -3    3.90    0.19
  -1  -5  -3   54.34    1.37
  -1  -5  -3   54.97    1.37
   1  -5   3   53.32    1.36
  -1  -5  -3   55.45    1.34
  -1  -5  -3   56.46    1.42
   1  -5   3   53.42    1.34
   1   5   3   54.60    1.39
  -1   5  -3   53.51    1.37
  -1   5  -3   55.92    1.38
  -2  -5  -3    0.28    0.08
   2  -5   3    0.25    0.05
  -2  -5  -3    0.26    0.06
   2  -5   3    0.34    0.06
  -2  -5  -3    0.34    0.06
   2   5   3    0.16    0.06
  -2   5  -3    0.25    0.06
  -2   5  -3    0.15    0.05
   3  -5   3    4.78    0.19
  -3  -5  -3    4.69    0.24
  -3  -5  -3    4.63    0.20
  -3  -5  -3    4.47    0.19
   3  -5   3    4.74    0.19
  -3   5  -3    4.86    0.20
   3   5   3    4.43    0.21
  -3   5  -3    4.48    0.20
  -4  -5  -3    0.77    0.09
   4  -5   3    0.88    0.10
   4  -5   3    0.58    0.08
   4   5   3    0.47    0.08
  -4   5  -3    0.70    0.09
   5  -5   3    0.58    0.09
  -5  -5  -3    0.54    0.08
   5  -5   3    0.41    0.07
  -5   5  -3    0.38    0.07
   5   5   3    0.39    0.07
  -6  -5  -3    0.03    0.04
   6  -5   3    0.11    0.06
   6  -5   3    0.13    0.06
  -6   5  -3    0.13    0.05
   7  -5   3    3.53    0.20
  -7  -5  -3    4.07    0.20
   7  -5   3    4.04    0.21
  -7   5  -3    3.51    0.20
   8  -5   3    0.90    0.12
   8  -5   3    1.01    0.15
  -8  -5  -3    0.87    0.11
  -8   5  -3    0.80    0.11
  -6  -6   3    0.86    0.12
   6  -6  -3    0.87    0.13
   6  -6  -3    0.73    0.11
  -6   6   3    0.77    0.11
   5  -6  -3    1.51    0.16
  -5  -6   3    1.88    0.15
   5  -6  -3    1.60    0.14
   5   6  -3    1.83    0.14
  -5   6   3    1.49    0.15
  -4  -6   3    0.25    0.07
   4  -6  -3    0.34    0.08
   4  -6  -3    0.34    0.09
  -4  -6   3    0.46    0.10
   4   6  -3    0.35    0.08
  -4   6   3    0.31    0.07
   3  -6  -3    0.29    0.07
   3  -6  -3    0.19    0.07
  -3  -6   3    0.16    0.07
  -3  -6   3    0.18    0.06
  -3  -6   3    0.24    0.06
   3   6  -3    0.19    0.07
  -3   6   3    0.24    0.06
  -3   6   3    0.23    0.06
   2  -6  -3    3.16    0.19
   2  -6  -3    3.41    0.17
  -2  -6   3    3.02    0.20
  -2  -6   3    3.50    0.19
  -2  -6   3    3.12    0.18
   2   6  -3    3.20    0.19
  -2   6   3    3.31    0.18
  -2   6   3    2.97    0.17
   1  -6  -3    0.04    0.04
  -1  -6   3    0.03    0.05
  -1  -6   3    0.08    0.05
  -1  -6   3    0.07    0.05
  -1   6   3    0.08    0.04
  -1   6   3    0.05    0.05
   1   6  -3    0.02    0.05
   0  -6  -3    8.41    0.34
   0  -6   3    7.80    0.31
   0  -6   3    8.30    0.32
   0  -6  -3    8.16    0.31
   0  -6  -3    7.95    0.32
   0  -6  -3    8.24    0.31
   0  -6   3    8.06    0.30
   0   6   3    8.09    0.32
   0   6  -3    8.79    0.33
   1  -6   3    3.08    0.18
  -1  -6  -3    3.24    0.20
  -1  -6  -3    2.99    0.17
   1  -6   3    2.98    0.18
   1  -6   3    3.25    0.18
  -1  -6  -3    3.32    0.17
   1   6   3    3.05    0.18
  -1   6  -3    3.05    0.18
  -2  -6  -3    0.39    0.08
  -2  -6  -3    0.12    0.06
  -2  -6  -3    0.19    0.06
   2  -6   3    0.21    0.06
  -2   6  -3    0.12    0.05
   2   6   3    0.18    0.06
  -2   6  -3    0.27    0.07
  -3  -6  -3    0.01    0.03
   3  -6   3    0.05    0.04
   3  -6   3   -0.02    0.04
  -3  -6  -3    0.02    0.03
  -3  -6  -3    0.01    0.05
  -3   6  -3   -0.01    0.04
   3   6   3    0.04    0.05
  -3   6  -3   -0.05    0.03
   4  -6   3    0.01    0.04
  -4  -6  -3    0.02    0.04
   4  -6   3    0.07    0.04
  -4   6  -3   -0.01    0.04
   4   6   3    0.08    0.05
   5  -6   3    0.19    0.07
  -5  -6  -3    0.21    0.06
   5  -6   3    0.18    0.06
   5   6   3    0.27    0.07
  -5   6  -3    0.19    0.06
  -6  -6  -3    0.12    0.05
   6  -6   3    0.07    0.05
   6  -6   3    0.26    0.07
  -6   6  -3    0.14    0.06
  -4  -7   3    0.06    0.06
  -4  -7   3    0.06    0.05
   4  -7  -3    0.10    0.06
   4  -7  -3    0.13    0.06
  -4   7   3    0.09    0.06
   4   7  -3    0.18    0.07
  -3  -7   3    0.25    0.08
   3  -7  -3    0.35    0.09
  -3  -7   3    0.27    0.08
   3  -7  -3    0.36    0.07
  -3  -7   3    0.22    0.08
  -3   7   3    0.31    0.08
   3   7  -3    0.24    0.08
  -3   7   3    0.19    0.06
  -2  -7   3    0.08    0.06
  -2  -7   3    0.16    0.07
   2  -7  -3    0.16    0.07
  -2  -7   3    0.16    0.07
  -2   7   3    0.16    0.06
   2   7  -3    0.12    0.06
  -2   7   3    0.15    0.06
   1  -7  -3    0.06    0.05
   1  -7  -3    0.04    0.05
  -1  -7   3   -0.05    0.04
  -1  -7   3   -0.01    0.05
   1  -7  -3    0.04    0.05
  -1  -7   3   -0.02    0.04
  -1   7   3   -0.02    0.04
   1   7  -3   -0.07    0.04
   0  -7   3    0.22    0.08
   0  -7   3    0.28    0.07
   0  -7  -3    0.18    0.06
   0  -7   3    0.17    0.07
   0  -7  -3    0.31    0.08
   0  -7  -3    0.27    0.08
   0   7   3    0.27    0.08
   0   7  -3    0.24    0.07
   1  -7   3    0.46    0.09
   1  -7   3    0.62    0.10
   1  -7   3    0.55    0.10
  -1  -7  -3    0.41    0.08
  -1  -7  -3    0.44    0.09
  -1  -7  -3    0.36    0.09
   1   7   3    0.43    0.09
  -1   7  -3    0.49    0.09
  -2  -7  -3    0.12    0.06
  -2  -7  -3    0.06    0.05
   2  -7   3    0.15    0.07
   2  -7   3    0.16    0.07
   2  -7   3    0.13    0.06
  -2  -7  -3    0.04    0.06
   2   7   3    0.03    0.05
  -2   7  -3    0.13    0.05
   3  -7   3    0.20    0.07
  -3  -7  -3    0.17    0.07
  -3  -7  -3    0.08    0.05
  -3  -7  -3    0.27    0.07
  -3   7  -3    0.16    0.06
   3   7   3    0.17    0.07
  -3   7  -3    0.15    0.05
  -4  -7  -3   -0.04    0.04
   4  -7   3    0.12    0.06
  -4   7  -3    0.06    0.05
   4   7   3    0.17    0.07
 -10   0   4    0.83    0.11
  10   0  -4    0.81    0.12
   9   0  -4    0.96    0.11
  -9   0   4    1.08    0.12
   8   0  -4    0.47    0.08
  -8   0   4    0.50    0.08
   8   0  -4    0.48    0.10
  -8   0   4    0.45    0.07
  -7   0   4    2.24    0.13
   7   0  -4    2.13    0.13
   7   0  -4    2.59    0.17
  -7   0   4    2.24    0.12
   6   0  -4   47.01    1.18
   6   0  -4   49.75    1.24
  -6   0   4   46.87    1.17
  -6   0   4   46.26    1.19
   5   0  -4    5.31    0.19
  -5   0   4    5.33    0.17
  -5   0   4    5.10    0.19
   5   0  -4    5.34    0.22
   4   0  -4    0.75    0.08
  -4   0   4    0.85    0.07
  -4   0   4    0.83    0.05
  -4   0   4    0.88    0.04
  -4   0   4    0.74    0.06
   4   0  -4    0.78    0.06
  -3   0   4    5.64    0.19
  -3   0   4    5.03    0.15
   3   0  -4    5.47    0.19
   3   0  -4    5.12    0.16
  -3   0   4    5.45    0.15
  -2   0   4  486.87   11.32
   2   0  -4  463.79   11.43
  -2   0   4  463.99   11.36
   2   0  -4  469.80   11.32
   2   0  -4  484.36   11.89
  -2   0   4  465.22   11.40
   1   0  -4   36.12    0.86
  -1   0   4   37.67    0.87
  -1   0   4   36.58    0.88
  -1   0   4   35.61    0.86
   0   0   4    7.14    0.21
   0   0   4    7.32    0.21
   0   0  -4    7.11    0.21
   1   0   4   78.68    1.84
  -1   0  -4   78.39    1.84
   1   0   4   79.97    1.84
  -1   0  -4   77.45    1.84
   2   0   4    0.11    0.02
   2   0   4    0.00    0.01
  -2   0  -4    0.11    0.02
  -2   0  -4    0.02    0.01
   3   0   4  151.88    3.62
  -3   0  -4  158.92    3.60
  -3   0  -4  152.25    3.61
   3   0   4  155.20    3.61
  -4   0  -4   58.41    1.39
   4   0   4   58.66    1.40
  -4   0  -4   56.79    1.38
   4   0   4   57.75    1.41
  -5   0  -4    0.95    0.06
   5   0   4    0.93    0.07
  -5   0  -4    0.95    0.07
   5   0   4    0.82    0.09
  -6   0  -4    9.79    0.30
   6   0   4    9.44    0.33
  -6   0  -4    9.88    0.30
   6   0   4    9.80    0.31
  -7   0  -4   10.93    0.34
  -7   0  -4   10.96    0.34
   7   0   4   11.15    0.35
   7   0   4   10.85    0.39
  -8   0  -4    0.08    0.04
  -8   0  -4    0.20    0.06
   8   0   4    0.06    0.05
   8   0   4    0.09    0.06
   9   0   4    0.75    0.12
   9   0   4    0.88    0.11
  -9   0  -4    0.87    0.11
  -9   0  -4    0.72    0.09
  10   0   4    3.29    0.20
  10   0   4    3.64    0.23
 -10   0  -4    3.29    0.18
 -10   0  -4    3.14    0.18
  10  -1  -4    0.40    0.08
 -10  -1   4    0.38    0.08
 -10   1   4    0.22    0.07
  10   1  -4    0.30    0.08
  -9  -1   4    3.17    0.18
   9  -1  -4    3.27    0.18
   9  -1  -4    3.31    0.17
   9  -1  -4    3.41    0.22
  -9   1   4    3.47    0.19
   9   1  -4    3.17    0.18
   8  -1  -4    1.95    0.13
   8  -1  -4    1.46    0.16
   8  -1  -4    1.92    0.12
  -8  -1   4    1.64    0.13
   8   1  -4    1.72    0.13
  -8   1   4    1.81    0.13
  -7  -1   4    1.25    0.10
   7  -1  -4    1.22    0.09
   7  -1  -4    1.31    0.14
   7  -1  -4    1.20    0.09
   7   1  -4    1.22    0.10
  -7   1   4    1.11    0.11
   6  -1  -4    5.81    0.25
  -6  -1   4    5.89    0.22
   6  -1  -4    5.99    0.21
   6  -1  -4    5.97    0.21
  -6  -1   4    5.91    0.19
   6   1  -4    5.96    0.22
  -6   1   4    6.07    0.22
   6   1  -4    5.78    0.25
   5  -1  -4    5.12    0.18
   5  -1  -4    4.58    0.17
  -5  -1   4    5.05    0.16
  -5  -1   4    5.11    0.18
   5  -1  -4    5.11    0.21
   5   1  -4    4.99    0.21
  -5   1   4    5.05    0.18
   4  -1  -4    0.35    0.05
   4  -1  -4    0.40    0.05
  -4  -1   4    0.40    0.07
  -4  -1   4    0.41    0.05
  -4  -1   4    0.39    0.04
   4  -1  -4    0.46    0.06
  -4   1   4    0.50    0.03
   4   1  -4    0.43    0.04
   4   1  -4    0.43    0.06
   4   1  -4    0.40    0.05
  -4   1   4    0.50    0.05
  -3  -1   4    9.78    0.30
  -3  -1   4   10.21    0.25
   3  -1  -4    9.91    0.29
  -3  -1   4    9.55    0.28
   3  -1  -4   10.07    0.27
   3  -1  -4   10.14    0.27
  -3   1   4    9.89    0.28
   3   1  -4    9.86    0.26
   3   1  -4    9.94    0.30
   3   1  -4    9.68    0.28
  -3   1   4    9.70    0.26
  -2  -1   4   77.79    1.82
   2  -1  -4   75.45    1.81
   2  -1  -4   77.78    1.83
   2  -1  -4   80.57    1.80
  -2  -1   4   73.99    1.84
   2   1  -4   75.37    1.81
  -2   1   4   75.38    1.81
   2   1  -4   78.52    1.82
  -2   1   4   78.68    1.81
  -1  -1   4   61.07    1.43
  -1  -1   4   60.20    1.43
  -1  -1   4   61.33    1.44
   1  -1  -4   61.75    1.45
   1  -1  -4   61.12    1.43
  -1   1   4   60.87    1.43
  -1   1   4   61.29    1.44
   1   1  -4   60.61    1.43
   1   1  -4   59.71    1.44
   0  -1   4   59.68    1.37
   0  -1  -4   59.19    1.38
   0  -1   4   57.32    1.36
   0  -1  -4   57.01    1.39
   0  -1   4   57.94    1.37
   0   1   4   61.85    1.38
   0   1  -4   57.54    1.38
   0   1  -4   58.14    1.38
  -1  -1  -4    9.26    0.24
  -1  -1  -4    8.89    0.23
  -1  -1  -4    9.09    0.23
  -1   1  -4    9.11    0.23
   1   1   4    9.41    0.24
  -1   1  -4    9.17    0.23
   1   1   4    9.17    0.23
  -1   1  -4    9.24    0.24
   1   1   4    9.08    0.25
  -1   1  -4    8.93    0.24
  -2  -1  -4   52.81    1.24
  -2  -1  -4   51.55    1.25
  -2   1  -4   52.69    1.24
   2   1   4   50.02    1.27
   2   1   4   53.95    1.25
  -2   1  -4   52.71    1.24
  -2   1  -4   51.99    1.24
  -2   1  -4   54.35    1.25
   2   1   4   52.89    1.25
   3  -1   4    5.67    0.17
   3  -1   4    5.63    0.17
  -3  -1  -4    5.81    0.17
   3  -1   4    5.65    0.17
  -3  -1  -4    5.81    0.17
  -3   1  -4    5.85    0.17
   3   1   4    5.72    0.20
   3   1   4    6.17    0.17
  -3   1  -4    5.59    0.18
   3   1   4    5.62    0.18
  -4  -1  -4   48.23    1.15
  -4  -1  -4   46.47    1.15
   4  -1   4   47.20    1.16
   4  -1   4   47.03    1.15
   4   1   4   47.38    1.19
   4   1   4   47.21    1.16
  -4   1  -4   47.62    1.16
   4   1   4   49.54    1.13
  -4   1  -4   47.28    1.15
   5  -1   4    0.03    0.03
   5  -1   4    0.00    0.03
  -5  -1  -4    0.05    0.02
  -5  -1  -4    0.03    0.03
   5   1   4    0.03    0.03
  -5   1  -4    0.03    0.02
   5   1   4   -0.01    0.03
  -5   1  -4    0.01    0.03
   6  -1   4    5.21    0.22
  -6  -1  -4    5.39    0.19
  -6  -1  -4    5.15    0.19
   6  -1   4    5.49    0.20
  -6   1  -4    5.47    0.20
   6   1   4    5.91    0.24
  -6   1  -4    5.29    0.20
   6   1   4    5.34    0.20
   7  -1   4    0.89    0.11
   7  -1   4    0.82    0.09
  -7  -1  -4    0.79    0.08
  -7  -1  -4    1.00    0.10
  -7   1  -4    0.84    0.09
   7   1   4    0.84    0.12
   7   1   4    0.97    0.10
  -7   1  -4    0.89    0.09
   8  -1   4    1.26    0.12
  -8  -1  -4    1.31    0.10
  -8  -1  -4    1.33    0.10
   8  -1   4    1.49    0.15
  -8   1  -4    1.30    0.11
   8   1   4    1.33    0.13
   8   1   4    1.38    0.16
  -8   1  -4    1.51    0.11
  -9  -1  -4    0.54    0.08
  -9  -1  -4    0.42    0.07
   9  -1   4    0.74    0.12
   9  -1   4    0.64    0.10
   9   1   4    0.46    0.08
   9   1   4    0.69    0.11
  -9   1  -4    0.50    0.08
  -9   1  -4    0.48    0.09
  10  -1   4    0.79    0.11
  10  -1   4    0.77    0.13
 -10  -1  -4    0.86    0.11
 -10   1  -4    0.77    0.10
  10   1   4    0.64    0.10
 -10   1  -4    0.80    0.11
  10  -2  -4    1.29    0.13
  10  -2  -4    1.14    0.16
 -10  -2   4    1.12    0.13
  10   2  -4    1.07    0.13
 -10   2   4    0.96    0.12
   9  -2  -4    1.76    0.19
   9  -2  -4    1.58    0.13
  -9  -2   4    1.44    0.14
   9   2  -4    1.49    0.15
  -9   2   4    1.39    0.14
   8  -2  -4    3.95    0.23
   8  -2  -4    3.76    0.22
   8  -2  -4    4.03    0.19
  -8  -2   4    4.18    0.20
  -8   2   4    4.05    0.20
   8   2  -4    3.99    0.20
   7  -2  -4    0.11    0.06
   7  -2  -4    0.04    0.04
   7  -2  -4    0.03    0.03
  -7  -2   4    0.06    0.04
   7   2  -4    0.08    0.05
  -7   2   4    0.07    0.05
   6  -2  -4    6.84    0.25
   6  -2  -4    6.67    0.27
  -6  -2   4    6.71    0.25
   6  -2  -4    7.11    0.23
   6   2  -4    6.50    0.25
  -6   2   4    6.63    0.25
   5  -2  -4   49.06    1.22
   5  -2  -4   50.03    1.25
  -5  -2   4   50.15    1.28
  -5  -2   4   48.94    1.22
   5  -2  -4   49.99    1.20
   5   2  -4   48.88    1.22
  -5   2   4   47.88    1.22
   5   2  -4   48.82    1.20
  -4  -2   4    2.53    0.09
   4  -2  -4    2.43    0.13
  -4  -2   4    2.37    0.11
   4  -2  -4    2.40    0.10
  -4  -2   4    2.27    0.14
   4   2  -4    2.51    0.11
  -4   2   4    2.53    0.11
   4   2  -4    2.35    0.11
  -4   2   4    2.36    0.09
   3  -2  -4   32.26    0.82
  -3  -2   4   31.94    0.82
   3  -2  -4   32.18    0.83
  -3  -2   4   31.31    0.85
  -3  -2   4   34.37    0.77
   3  -2  -4   35.37    0.79
   3   2  -4   32.78    0.81
   3   2  -4   33.16    0.81
  -3   2   4   32.38    0.80
  -3   2   4   31.53    0.81
  -2  -2   4   93.79    2.20
   2  -2  -4   97.01    2.15
   2  -2  -4   93.38    2.17
  -2  -2   4   89.81    2.17
   2  -2  -4   88.43    2.19
  -2  -2   4   90.81    2.17
  -2   2   4   92.62    2.17
   2   2  -4   90.89    2.17
  -2   2   4   91.35    2.17
   2   2  -4   90.94    2.18
   1  -2  -4    6.48    0.19
  -1  -2   4    6.65    0.19
  -1  -2   4    6.21    0.20
   1  -2  -4    6.61    0.21
   1   2  -4    6.69    0.20
  -1   2   4    6.55    0.20
   1   2  -4    6.78    0.19
  -1   2   4    6.54    0.19
   0  -2   4   29.06    0.67
   0  -2  -4   28.09    0.71
   0  -2   4   26.88    0.68
   0  -2  -4   27.73    0.69
   0   2  -4   29.11    0.70
   0   2  -4   28.30    0.69
   0   2   4   28.15    0.69
   0   2  -4   27.95    0.68
   0   2   4   29.08    0.70
  -1  -2  -4   31.05    0.75
  -1  -2  -4   30.55    0.78
  -1  -2  -4   31.04    0.75
  -1  -2  -4   31.24    0.75
  -1   2  -4   30.81    0.76
   1   2   4   30.88    0.77
  -1   2  -4   31.06    0.75
  -1   2  -4   30.96    0.74
  -1   2  -4   31.00    0.76
   1   2   4   30.86    0.81
   1   2   4   31.51    0.74
  -2  -2  -4    6.19    0.21
  -2  -2  -4    5.84    0.17
  -2  -2  -4    5.66    0.17
  -2  -2  -4    5.79    0.17
   2   2   4    5.79    0.17
  -2   2  -4    5.61    0.17
   2   2   4    5.62    0.20
  -2   2  -4    5.69    0.17
  -2   2  -4    5.30    0.17
   2   2   4    5.65    0.18
  -2   2  -4    5.63    0.16
  -3  -2  -4   18.10    0.48
   3  -2   4   18.39    0.46
  -3  -2  -4   18.75    0.52
  -3  -2  -4   18.98    0.48
   3  -2   4   18.70    0.47
   3  -2   4   18.74    0.46
   3   2   4   18.17    0.48
   3   2   4   18.49    0.48
  -3   2  -4   17.90    0.48
  -3   2  -4   19.12    0.47
  -3   2  -4   18.62    0.48
   3   2   4   18.76    0.52
  -4  -2  -4    0.04    0.03
  -4  -2  -4    0.08    0.03
   4  -2   4    0.06    0.03
   4  -2   4    0.09    0.03
  -4  -2  -4    0.09    0.03
  -4   2  -4    0.06    0.03
   4   2   4    0.05    0.03
   4   2   4    0.10    0.03
  -4   2  -4    0.06    0.02
  -4   2  -4    0.09    0.03
   4   2   4    0.05    0.04
   5  -2   4    0.30    0.05
  -5  -2  -4    0.31    0.05
  -5  -2  -4    0.42    0.05
   5  -2   4    0.35    0.05
  -5   2  -4    0.39    0.06
  -5   2  -4    0.33    0.05
   5   2   4    0.40    0.06
   5   2   4    0.26    0.06
  -6  -2  -4    0.06    0.04
  -6  -2  -4    0.07    0.03
   6  -2   4    0.07    0.04
   6  -2   4    0.05    0.04
   6   2   4    0.10    0.05
  -6   2  -4    0.05    0.03
  -6   2  -4    0.04    0.04
   6   2   4    0.10    0.04
   7  -2   4    0.15    0.06
   7  -2   4    0.11    0.04
  -7  -2  -4    0.18    0.05
  -7  -2  -4    0.22    0.05
   7   2   4    0.13    0.05
  -7   2  -4    0.10    0.04
  -7   2  -4    0.21    0.06
   8  -2   4    0.03    0.05
   8  -2   4    0.02    0.04
  -8  -2  -4    0.04    0.03
  -8   2  -4    0.00    0.04
  -8   2  -4    0.00    0.04
   8   2   4    0.05    0.04
   9  -2   4    0.11    0.05
  -9  -2  -4    0.21    0.05
   9  -2   4    0.04    0.06
   9   2   4    0.15    0.06
  -9   2  -4    0.12    0.05
  -9   2  -4    0.18    0.07
 -10  -2  -4    0.08    0.03
  10  -2   4   -0.01    0.05
  10  -2   4    0.00    0.04
  10   2   4    0.00    0.04
 -10   2  -4    0.11    0.04
 -10   2  -4    0.03    0.06
   9  -3  -4    1.19    0.13
  -9  -3   4    1.14    0.13
   9  -3  -4    1.05    0.16
  -9   3   4    1.13    0.13
   9   3  -4    1.06    0.13
   8  -3  -4    6.47    0.27
  -8  -3   4    6.52    0.27
   8  -3  -4    6.31    0.30
   8   3  -4    6.35    0.27
  -8   3   4    6.48    0.28
  -7  -3   4    0.79    0.10
   7  -3  -4    0.94    0.12
   7  -3  -4    0.75    0.10
  -7   3   4    0.90    0.10
   7   3  -4    0.78    0.10
   6  -3  -4   17.39    0.54
   6  -3  -4   17.06    0.51
  -6  -3   4   17.20    0.51
  -6   3   4   17.22    0.51
   6   3  -4   17.19    0.50
  -5  -3   4   24.94    0.72
  -5  -3   4   24.64    0.66
   5  -3  -4   23.78    0.66
   5  -3  -4   24.68    0.69
   5   3  -4   24.43    0.65
   5   3  -4   24.13    0.65
  -5   3   4   23.61    0.66
  -4  -3   4   22.24    0.61
  -4  -3   4   22.41    0.65
   4  -3  -4   22.09    0.61
   4  -3  -4   22.69    0.63
  -4   3   4   23.25    0.61
   4   3  -4   22.74    0.60
   4   3  -4   23.11    0.61
  -4   3   4   22.84    0.59
  -3  -3   4    3.00    0.13
  -3  -3   4    2.61    0.15
   3  -3  -4    2.91    0.13
   3  -3  -4    2.86    0.14
   3   3  -4    2.84    0.12
   3   3  -4    2.74    0.13
  -3   3   4    2.92    0.13
  -3   3   4    2.85    0.12
   2  -3  -4    0.07    0.03
  -2  -3   4    0.04    0.03
  -2  -3   4    0.02    0.03
   2  -3  -4    0.08    0.03
  -2  -3   4    0.02    0.03
   2   3  -4    0.04    0.02
  -2   3   4    0.05    0.03
  -2   3   4    0.10    0.03
   2   3  -4    0.03    0.03
   1  -3  -4    3.55    0.15
  -1  -3   4    3.64    0.15
  -1  -3   4    3.92    0.15
  -1  -3   4    4.02    0.11
   1  -3  -4    4.14    0.14
  -1  -3   4    3.73    0.14
   1   3  -4    3.74    0.13
  -1   3   4    3.91    0.14
  -1   3   4    3.75    0.15
   0  -3  -4   48.49    1.23
   0  -3  -4   48.86    1.20
   0  -3   4   49.47    1.21
   0  -3   4   51.75    1.20
   0  -3   4   48.64    1.21
   0  -3   4   50.54    1.18
   0  -3   4   48.06    1.19
   0   3  -4   50.37    1.22
   0   3   4   48.41    1.21
   0   3  -4   51.41    1.18
   0   3   4   48.69    1.20
   1  -3   4   78.58    1.86
   1  -3   4   78.06    1.87
  -1  -3  -4   78.89    1.88
  -1  -3  -4   78.90    1.88
  -1  -3  -4   77.42    1.87
   1  -3   4   79.41    1.85
  -1  -3  -4   80.53    1.92
   1   3   4   81.04    1.85
  -1   3  -4   81.20    1.85
   1   3   4   78.40    1.89
  -1   3  -4   78.59    1.88
  -1   3  -4   75.70    1.89
  -2  -3  -4    3.10    0.12
  -2  -3  -4    3.22    0.15
   2  -3   4    2.95    0.10
  -2  -3  -4    2.93    0.11
  -2  -3  -4    3.03    0.12
   2  -3   4    3.11    0.10
   2  -3   4    3.22    0.12
   2   3   4    3.03    0.13
  -2   3  -4    3.06    0.12
  -2   3  -4    2.81    0.12
  -2   3  -4    3.22    0.10
   2   3   4    3.17    0.11
   3  -3   4   20.97    0.52
  -3  -3  -4   20.52    0.55
  -3  -3  -4   21.30    0.60
  -3  -3  -4   21.54    0.54
  -3  -3  -4   20.78    0.55
   3  -3   4   21.35    0.52
   3  -3   4   21.52    0.53
   3   3   4   20.36    0.54
  -3   3  -4   20.65    0.56
   3   3   4   21.19    0.56
  -3   3  -4   21.17    0.55
  -3   3  -4   21.29    0.55
   4  -3   4    5.28    0.17
   4  -3   4    4.92    0.17
  -4  -3  -4    5.12    0.25
  -4  -3  -4    5.25    0.19
  -4  -3  -4    5.35    0.18
  -4   3  -4    5.27    0.19
   4   3   4    5.11    0.18
  -4   3  -4    5.25    0.19
   4   3   4    5.21    0.19
  -4   3  -4    5.39    0.19
  -5  -3  -4    7.68    0.26
   5  -3   4    7.77    0.24
  -5  -3  -4    7.62    0.24
   5  -3   4    7.72    0.25
   5   3   4    8.00    0.26
   5   3   4    7.50    0.25
  -5   3  -4    7.90    0.27
  -5   3  -4    7.91    0.27
   6  -3   4    6.83    0.25
  -6  -3  -4    6.83    0.24
  -6  -3  -4    6.97    0.29
  -6   3  -4    6.84    0.25
   6   3   4    6.52    0.25
  -6   3  -4    6.51    0.25
   7  -3   4   -0.04    0.04
  -7  -3  -4   -0.02    0.03
  -7   3  -4    0.00    0.03
   7   3   4   -0.03    0.03
  -7   3  -4   -0.01    0.04
   8  -3   4    0.00    0.05
  -8  -3  -4    0.01    0.03
   8   3   4    0.07    0.04
  -8   3  -4   -0.03    0.05
  -8   3  -4    0.00    0.04
   9  -3   4    0.03    0.05
   9  -3   4    0.07    0.06
  -9  -3  -4   -0.05    0.02
  -9   3  -4    0.08    0.04
   9   3   4    0.02    0.05
  -9  -4   4    7.39    0.32
   9  -4  -4    6.99    0.32
   9  -4  -4    7.46    0.36
  -9   4   4    7.46    0.34
   9   4  -4    7.47    0.31
  -8  -4   4    1.42    0.14
   8  -4  -4    1.15    0.15
   8  -4  -4    1.15    0.13
  -8   4   4    0.81    0.11
   8   4  -4    1.00    0.12
   7  -4  -4    5.18    0.27
  -7  -4   4    5.47    0.24
   7  -4  -4    4.69    0.23
  -7   4   4    5.10    0.23
   7   4  -4    5.18    0.23
  -6  -4   4    0.02    0.04
   6  -4  -4    0.09    0.06
   6  -4  -4    0.13    0.06
  -6   4   4    0.15    0.05
   6   4  -4    0.10    0.04
  -5  -4   4    0.17    0.05
  -5  -4   4    0.21    0.08
   5  -4  -4    0.22    0.06
   5  -4  -4    0.18    0.05
   5   4  -4    0.18    0.05
   5   4  -4    0.10    0.04
  -5   4   4    0.15    0.05
   4  -4  -4    0.59    0.09
  -4  -4   4    0.63    0.08
   4  -4  -4    0.66    0.08
  -4  -4   4    0.55    0.10
   4   4  -4    0.77    0.08
   4   4  -4    0.81    0.09
  -4   4   4    0.66    0.08
  -4   4   4    0.74    0.08
  -3  -4   4    0.38    0.06
  -3  -4   4    0.44    0.07
   3  -4  -4    0.43    0.06
   3  -4  -4    0.37    0.07
  -3  -4   4    0.41    0.08
   3   4  -4    0.33    0.05
  -3   4   4    0.31    0.06
  -3   4   4    0.41    0.06
   3   4  -4    0.33    0.06
  -2  -4   4    3.39    0.17
   2  -4  -4    3.53    0.17
  -2  -4   4    3.29    0.15
  -2  -4   4    3.29    0.15
   2  -4  -4    3.28    0.15
   2   4  -4    3.53    0.13
  -2   4   4    3.34    0.15
   2   4  -4    3.54    0.16
  -2   4   4    3.52    0.15
  -1  -4   4    8.31    0.28
   1  -4  -4    8.31    0.29
  -1  -4   4    8.48    0.27
  -1  -4   4    8.33    0.27
   1  -4  -4    8.57    0.26
  -1   4   4    8.13    0.27
  -1   4   4    7.75    0.26
   1   4  -4    8.75    0.24
   1   4  -4    8.79    0.29
   0  -4   4    9.97    0.31
   0  -4   4    9.86    0.30
   0  -4   4    9.98    0.31
   0  -4   4   10.20    0.28
   0  -4  -4    9.85    0.33
   0  -4  -4   10.15    0.30
   0   4   4    9.49    0.30
   0   4  -4    9.72    0.32
   0   4   4   10.25    0.32
  -1  -4  -4   35.83    0.90
   1  -4   4   34.79    0.89
  -1  -4  -4   36.10    0.89
  -1  -4  -4   36.50    0.95
  -1  -4  -4   34.36    0.90
   1  -4   4   36.50    0.88
   1   4   4   34.93    0.92
  -1   4  -4   35.08    0.91
  -1   4  -4   35.39    0.90
   2  -4   4    1.39    0.09
  -2  -4  -4    1.45    0.12
  -2  -4  -4    1.58    0.09
  -2  -4  -4    1.46    0.09
   2  -4   4    1.36    0.08
  -2  -4  -4    1.41    0.09
  -2   4  -4    1.52    0.10
   2   4   4    1.44    0.11
  -2   4  -4    1.40    0.10
  -3  -4  -4    6.99    0.24
   3  -4   4    6.92    0.22
  -3  -4  -4    6.56    0.24
   3  -4   4    6.93    0.24
  -3  -4  -4    6.84    0.22
  -3  -4  -4    7.39    0.29
   3   4   4    6.72    0.25
  -3   4  -4    7.04    0.24
  -3   4  -4    7.12    0.24
  -4  -4  -4    9.84    0.31
  -4  -4  -4    9.66    0.29
   4  -4   4    9.35    0.29
   4  -4   4    9.65    0.31
   4   4   4    9.76    0.30
   4   4   4   10.30    0.33
  -4   4  -4    9.82    0.32
  -5  -4  -4    0.23    0.05
   5  -4   4    0.21    0.06
   5  -4   4    0.18    0.05
  -5   4  -4    0.31    0.06
   5   4   4    0.18    0.05
   5   4   4    0.12    0.04
  -6  -4  -4    0.00    0.03
   6  -4   4    0.11    0.05
   6  -4   4    0.07    0.05
   6   4   4    0.06    0.04
  -6   4  -4    0.05    0.04
   7  -4   4    1.32    0.13
   7  -4   4    1.32    0.14
  -7  -4  -4    1.38    0.11
  -7   4  -4    1.31    0.13
   7   4   4    1.33    0.11
   8  -4   4    2.01    0.16
  -8  -4  -4    1.77    0.13
   8  -4   4    1.94    0.15
   8   4   4    1.83    0.14
  -8   4  -4    1.99    0.14
   9  -4   4   -0.04    0.06
  -9   4  -4    0.14    0.05
   9   4   4   -0.04    0.04
  -8  -5   4    2.26    0.16
   8  -5  -4    2.39    0.19
   8  -5  -4    2.36    0.18
  -8   5   4    2.30    0.17
   8   5  -4    2.33    0.15
   7  -5  -4    0.11    0.05
   7  -5  -4    0.07    0.06
  -7  -5   4    0.05    0.05
   7   5  -4    0.00    0.03
  -7   5   4    0.07    0.05
  -6  -5   4    0.86    0.11
   6  -5  -4    1.01    0.13
   6  -5  -4    0.92    0.12
  -6   5   4    0.77    0.11
   6   5  -4    1.10    0.09
   5  -5  -4    0.89    0.11
  -5  -5   4    1.00    0.14
  -5  -5   4    0.84    0.11
   5  -5  -4    0.78    0.11
  -5   5   4    0.74    0.10
   5   5  -4    0.88    0.11
  -4  -5   4    1.39    0.16
  -4  -5   4    1.11    0.11
   4  -5  -4    1.22    0.13
   4  -5  -4    1.11    0.11
   4   5  -4    1.09    0.12
  -4   5   4    1.20    0.16
  -4   5   4    1.05    0.11
  -3  -5   4    0.02    0.04
   3  -5  -4    0.01    0.04
  -3  -5   4    0.06    0.04
  -3  -5   4    0.04    0.04
   3  -5  -4    0.04    0.05
  -3   5   4    0.11    0.05
   3   5  -4    0.06    0.05
  -3   5   4    0.10    0.04
  -2  -5   4    6.14    0.27
  -2  -5   4    6.48    0.25
   2  -5  -4    6.47    0.24
  -2  -5   4    6.49    0.25
   2  -5  -4    6.26    0.26
  -2   5   4    6.34    0.24
   2   5  -4    5.96    0.25
  -2   5   4    6.63    0.25
  -1  -5   4    4.95    0.21
  -1  -5   4    5.22    0.22
   1  -5  -4    4.98    0.20
   1  -5  -4    5.33    0.23
  -1  -5   4    4.99    0.22
  -1   5   4    5.27    0.20
  -1   5   4    5.26    0.22
   1   5  -4    4.88    0.22
   0  -5   4   13.84    0.43
   0  -5  -4   14.02    0.41
   0  -5   4   14.28    0.44
   0  -5  -4   14.24    0.46
   0  -5  -4   14.17    0.43
   0  -5  -4   14.28    0.43
   0  -5   4   14.33    0.43
   0   5  -4   14.42    0.44
   0   5   4   14.03    0.44
  -1  -5  -4    3.17    0.15
  -1  -5  -4    2.91    0.14
  -1  -5  -4    3.17    0.15
   1  -5   4    3.00    0.14
   1  -5   4    2.85    0.15
  -1  -5  -4    3.05    0.18
  -1   5  -4    3.12    0.15
  -1   5  -4    2.77    0.16
   1   5   4    2.86    0.16
  -2  -5  -4    7.46    0.31
  -2  -5  -4    7.23    0.26
   2  -5   4    6.97    0.25
  -2  -5  -4    7.21    0.26
   2  -5   4    6.87    0.24
  -2  -5  -4    7.23    0.24
  -2   5  -4    6.59    0.25
  -2   5  -4    6.99    0.26
   2   5   4    7.10    0.27
  -3  -5  -4    3.13    0.15
  -3  -5  -4    2.65    0.19
  -3  -5  -4    3.21    0.16
   3  -5   4    2.87    0.14
   3  -5   4    2.80    0.14
  -3   5  -4    3.12    0.15
  -3   5  -4    3.04    0.16
   3   5   4    3.11    0.17
   4  -5   4    0.00    0.04
   4  -5   4   -0.01    0.03
  -4  -5  -4    0.08    0.04
  -4   5  -4    0.03    0.04
   4   5   4    0.00    0.04
   5  -5   4    0.03    0.04
   5  -5   4    0.03    0.04
  -5  -5  -4    0.07    0.04
  -5   5  -4    0.08    0.05
   5   5   4    0.05    0.04
   6  -5   4    1.39    0.14
   6  -5   4    1.60    0.13
  -6  -5  -4    1.39    0.12
  -6   5  -4    1.81    0.13
   7  -5   4    0.07    0.06
  -7  -5  -4    0.15    0.05
   7  -5   4    0.23    0.07
  -7   5  -4    0.20    0.06
  -8  -5  -4    0.06    0.03
   8  -5   4    0.10    0.06
   8  -5   4    0.12    0.07
  -8   5  -4   -0.03    0.04
  -6  -6   4   -0.01    0.05
   6  -6  -4    0.04    0.05
   6  -6  -4   -0.06    0.05
  -6   6   4    0.03    0.04
   5  -6  -4    1.26    0.14
  -5  -6   4    1.18    0.14
   5  -6  -4    1.16    0.14
  -5   6   4    0.87    0.12
   5   6  -4    1.03    0.13
  -4  -6   4    0.19    0.06
  -4  -6   4    0.18    0.07
   4  -6  -4    0.39    0.08
   4  -6  -4    0.22    0.07
  -4   6   4    0.28    0.07
   4   6  -4    0.25    0.07
   3  -6  -4    1.15    0.12
   3  -6  -4    1.22    0.14
  -3  -6   4    1.18    0.15
  -3  -6   4    1.45    0.14
  -3  -6   4    0.98    0.12
  -3   6   4    1.22    0.11
  -3   6   4    1.12    0.12
   3   6  -4    1.08    0.13
   2  -6  -4    1.69    0.12
   2  -6  -4    1.76    0.15
  -2  -6   4    1.62    0.17
  -2  -6   4    1.60    0.13
  -2  -6   4    1.84    0.14
  -2   6   4    1.50    0.13
   2   6  -4    1.67    0.14
  -2   6   4    1.47    0.12
   1  -6  -4    5.26    0.25
  -1  -6   4    4.84    0.22
  -1  -6   4    4.92    0.23
  -1  -6   4    4.99    0.24
   1  -6  -4    4.93    0.20
  -1   6   4    5.01    0.23
  -1   6   4    4.73    0.21
   1   6  -4    4.79    0.23
   0  -6   4    2.86    0.17
   0  -6  -4    2.86    0.17
   0  -6  -4    3.08    0.17
   0  -6   4    3.06    0.18
   0  -6  -4    3.09    0.15
   0  -6   4    2.95    0.17
   0  -6  -4    3.38    0.20
   0   6   4    3.18    0.18
   0   6  -4    2.74    0.17
   1  -6   4    0.33    0.07
  -1  -6  -4    0.58    0.10
   1  -6   4    0.36    0.07
  -1  -6  -4    0.57    0.09
  -1  -6  -4    0.58    0.08
   1  -6   4    0.41    0.08
  -1   6  -4    0.46    0.08
   1   6   4    0.43    0.09
   2  -6   4    0.39    0.07
  -2  -6  -4    0.56    0.09
  -2  -6  -4    0.55    0.10
  -2  -6  -4    0.55    0.08
  -2   6  -4    0.56    0.09
  -2   6  -4    0.39    0.07
   2   6   4    0.53    0.09
  -3  -6  -4    0.08    0.05
  -3  -6  -4    0.03    0.04
   3  -6   4    0.06    0.04
  -3  -6  -4    0.04    0.04
   3  -6   4    0.06    0.05
  -3   6  -4    0.07    0.04
   3   6   4    0.07    0.05
  -3   6  -4    0.03    0.04
   4  -6   4    0.13    0.05
  -4  -6  -4    0.25    0.07
   4  -6   4    0.28    0.06
  -4   6  -4    0.32    0.07
   4   6   4    0.31    0.08
   5  -6   4    0.32    0.07
  -5  -6  -4    0.28    0.07
   5  -6   4    0.26    0.06
  -5   6  -4    0.30    0.07
   5   6   4    0.40    0.08
   6  -6   4    0.01    0.05
  -6  -6  -4    0.01    0.04
   6  -6   4    0.19    0.06
  -6   6  -4    0.01    0.04
  -4  -7   4    0.31    0.09
  -4  -7   4    0.32    0.08
   4  -7  -4    0.36    0.08
   4  -7  -4    0.33    0.09
   4   7  -4    0.40    0.09
  -4   7   4    0.42    0.09
  -3  -7   4    6.27    0.29
   3  -7  -4    6.64    0.32
  -3  -7   4    6.32    0.32
   3  -7  -4    6.36    0.27
  -3  -7   4    6.29    0.28
  -3   7   4    6.18    0.28
  -3   7   4    6.28    0.28
   3   7  -4    6.77    0.31
  -2  -7   4    2.03    0.17
  -2  -7   4    1.92    0.16
   2  -7  -4    1.90    0.13
  -2  -7   4    1.68    0.17
   2  -7  -4    1.88    0.17
  -2   7   4    1.87    0.14
   2   7  -4    1.64    0.17
  -2   7   4    1.93    0.15
  -1  -7   4    0.28    0.07
   1  -7  -4    0.27    0.07
   1  -7  -4    0.27    0.08
   1  -7  -4    0.23    0.07
  -1  -7   4    0.27    0.08
  -1  -7   4    0.25    0.08
   1   7  -4    0.14    0.07
  -1   7   4    0.23    0.07
   0  -7  -4    1.87    0.14
   0  -7   4    1.98    0.16
   0  -7   4    1.90    0.16
   0  -7  -4    2.06    0.15
   0  -7   4    1.82    0.15
   0  -7  -4    2.07    0.18
   0   7  -4    1.79    0.15
   0   7   4    1.86    0.16
   1  -7   4    0.20    0.07
  -1  -7  -4    0.10    0.06
   1  -7   4    0.16    0.07
   1  -7   4    0.18    0.07
  -1  -7  -4    0.08    0.07
  -1  -7  -4    0.21    0.07
   1   7   4    0.22    0.08
  -1   7  -4    0.19    0.07
   2  -7   4    0.41    0.09
  -2  -7  -4    0.39    0.10
  -2  -7  -4    0.46    0.08
   2  -7   4    0.48    0.10
  -2  -7  -4    0.43    0.09
   2  -7   4    0.41    0.09
  -2   7  -4    0.39    0.08
   2   7   4    0.46    0.09
  -3  -7  -4    2.97    0.18
   3  -7   4    2.92    0.18
  -3  -7  -4    3.00    0.18
  -3   7  -4    2.99    0.18
  -3   7  -4    3.35    0.19
   3   7   4    2.60    0.19
   4  -7   4    0.49    0.09
  -4  -7  -4    0.31    0.07
  -4   7  -4    0.38    0.08
   4   7   4    0.39    0.09
  10   0  -5   -0.01    0.04
 -10   0   5    0.09    0.05
   9   0  -5   -0.04    0.04
  -9   0   5    0.01    0.04
   8   0  -5    0.00    0.04
   8   0  -5    0.02    0.05
  -8   0   5   -0.04    0.03
   7   0  -5    0.00    0.03
   7   0  -5    0.08    0.03
   7   0  -5   -0.02    0.04
  -7   0   5    0.02    0.03
  -6   0   5    0.06    0.03
   6   0  -5    0.00    0.03
   6   0  -5    0.00    0.04
  -6   0   5   -0.02    0.03
  -5   0   5    0.01    0.02
   5   0  -5   -0.02    0.02
  -5   0   5    0.03    0.03
   5   0  -5    0.02    0.03
  -4   0   5    0.02    0.02
   4   0  -5    0.00    0.02
   4   0  -5    0.09    0.02
  -4   0   5   -0.03    0.02
  -4   0   5   -0.01    0.01
   4   0  -5    0.02    0.03
   3   0  -5    0.00    0.02
  -3   0   5   -0.01    0.01
  -3   0   5    0.00    0.02
   3   0  -5    0.02    0.01
  -3   0   5   -0.02    0.02
   3   0  -5    0.07    0.03
  -2   0   5   -0.01    0.02
  -2   0   5    0.00    0.01
   2   0  -5   -0.02    0.02
   2   0  -5   -0.01    0.01
   2   0  -5    0.00    0.01
  -1   0   5   -0.07    0.01
  -1   0   5   -0.09    0.01
  -1   0   5   -0.09    0.02
   1   0  -5   -0.08    0.01
   1   0  -5   -0.09    0.01
   0   0  -5   -0.05    0.01
   0   0   5   -0.05    0.02
   0   0  -5   -0.06    0.01
   0   0   5   -0.03    0.02
   1   0   5    0.01    0.02
   1   0   5   -0.01    0.01
  -1   0  -5    0.01    0.01
  -1   0  -5    0.03    0.02
  -2   0  -5    0.00    0.01
   2   0   5   -0.02    0.01
   2   0   5   -0.03    0.02
   2   0   5   -0.03    0.01
  -2   0  -5    0.01    0.01
  -3   0  -5    0.02    0.02
   3   0   5   -0.02    0.02
   3   0   5    0.01    0.02
   3   0   5    0.02    0.02
  -3   0  -5    0.00    0.01
   4   0   5    0.00    0.03
   4   0   5    0.00    0.02
  -4   0  -5   -0.01    0.01
  -4   0  -5    0.00    0.02
   5   0   5    0.00    0.03
  -5   0  -5    0.01    0.02
   5   0   5    0.01    0.04
  -5   0  -5    0.04    0.03
   6   0   5   -0.06    0.03
  -6   0  -5    0.00    0.03
  -6   0  -5   -0.02    0.02
   6   0   5   -0.04    0.03
   7   0   5    0.00    0.05
  -7   0  -5    0.07    0.04
  -7   0  -5    0.02    0.03
   7   0   5   -0.03    0.03
   8   0   5    0.12    0.06
  -8   0  -5   -0.01    0.03
   8   0   5   -0.06    0.03
  -8   0  -5    0.04    0.03
  -9   0  -5   -0.01    0.04
   9   0   5   -0.04    0.04
   9   0   5   -0.09    0.04
  -9   0  -5    0.08    0.04
  10   0   5    0.12    0.07
  10   0   5   -0.01    0.05
 -10   0  -5    0.07    0.03
 -10   0  -5    0.00    0.04
 -10  -1   5    2.94    0.18
  10  -1  -5    2.84    0.17
  10   1  -5    2.92    0.19
 -10   1   5    2.71    0.18
  -9  -1   5    2.19    0.15
   9  -1  -5    2.28    0.15
   9  -1  -5    2.37    0.18
   9  -1  -5    2.34    0.14
  -9   1   5    2.14    0.15
   9   1  -5    2.20    0.15
  -8  -1   5    0.40    0.08
   8  -1  -5    0.37    0.07
   8  -1  -5    0.52    0.08
   8  -1  -5    0.48    0.10
   8   1  -5    0.35    0.07
  -8   1   5    0.46    0.08
   7  -1  -5    0.49    0.09
   7  -1  -5    0.56    0.07
  -7  -1   5    0.54    0.07
   7  -1  -5    0.58    0.07
   7   1  -5    0.52    0.08
  -7   1   5    0.55    0.08
   6  -1  -5    1.97    0.11
  -6  -1   5    1.88    0.11
   6  -1  -5    1.96    0.11
   6  -1  -5    1.89    0.14
  -6   1   5    1.81    0.11
   6   1  -5    1.65    0.11
   6   1  -5    1.93    0.16
   5  -1  -5   14.29    0.39
  -5  -1   5   14.19    0.40
  -5  -1   5   14.09    0.37
   5  -1  -5   13.97    0.39
   5  -1  -5   14.07    0.44
   5   1  -5   13.68    0.44
   5   1  -5   14.03    0.40
  -5   1   5   14.13    0.40
  -4  -1   5   22.40    0.60
   4  -1  -5   23.00    0.59
  -4  -1   5   24.09    0.57
   4  -1  -5   22.83    0.59
  -4  -1   5   23.49    0.64
   4  -1  -5   21.98    0.62
  -4   1   5   22.44    0.60
   4   1  -5   23.91    0.63
  -4   1   5   23.94    0.57
   4   1  -5   23.35    0.58
   4   1  -5   22.65    0.60
  -3  -1   5   32.89    0.85
   3  -1  -5   33.09    0.81
   3  -1  -5   32.10    0.84
  -3  -1   5   34.97    0.79
   3  -1  -5   34.53    0.80
  -3  -1   5   32.10    0.81
   3   1  -5   31.68    0.81
  -3   1   5   33.82    0.80
   3   1  -5   33.71    0.84
   3   1  -5   32.26    0.80
  -3   1   5   32.44    0.81
   2  -1  -5   64.65    1.54
   2  -1  -5   64.64    1.50
  -2  -1   5   65.57    1.54
  -2  -1   5   63.88    1.51
   2  -1  -5   62.86    1.51
  -2   1   5   64.48    1.51
  -2   1   5   63.32    1.51
   2   1  -5   63.52    1.51
   2   1  -5   62.14    1.51
  -1  -1   5  590.37   14.21
  -1  -1   5  598.77   13.97
  -1  -1   5  596.02   14.02
   1  -1  -5  547.62   14.02
   1  -1  -5  589.88   13.82
   1  -1  -5  546.92   13.94
  -1   1   5  598.84   14.09
   1   1  -5  577.31   14.06
   1   1  -5  576.87   14.10
  -1   1   5  596.24   13.95
   0  -1  -5    0.49    0.05
   0  -1  -5    0.44    0.03
   0  -1  -5    0.41    0.03
   0  -1   5    0.34    0.03
   0  -1   5    0.37    0.03
   0  -1   5    0.34    0.02
   0   1   5    0.39    0.04
   0   1   5    0.37    0.04
   0   1  -5    0.41    0.03
   0   1  -5    0.38    0.03
  -1  -1  -5   85.60    2.01
  -1  -1  -5   87.84    2.00
  -1   1  -5   87.40    2.00
   1   1   5   82.99    2.02
   1   1   5   86.10    2.00
  -1   1  -5   86.67    2.00
  -1   1  -5   84.46    2.01
   1   1   5   84.55    2.01
  -1   1  -5   84.72    2.00
  -2  -1  -5    1.56    0.07
  -2  -1  -5    1.66    0.06
   2   1   5    1.52    0.07
  -2   1  -5    1.68    0.06
  -2   1  -5    1.58    0.06
  -2   1  -5    1.62    0.07
  -2   1  -5    1.52    0.07
   2   1   5    1.57    0.08
   3  -1   5    1.13    0.05
  -3  -1  -5    0.99    0.06
   3  -1   5    1.07    0.06
   3  -1   5    1.13    0.06
   3  -1   5    1.11    0.06
  -3  -1  -5    1.14    0.05
   3   1   5    0.99    0.06
   3   1   5    1.13    0.06
  -3   1  -5    1.14    0.06
   3   1   5    1.10    0.08
  -3   1  -5    1.12    0.06
   4  -1   5    6.11    0.17
  -4  -1  -5    5.67    0.19
   4  -1   5    5.92    0.19
   4  -1   5    5.77    0.19
  -4  -1  -5    5.82    0.18
  -4   1  -5    5.72    0.19
   4   1   5    6.18    0.17
   4   1   5    5.70    0.22
   4   1   5    5.77    0.19
  -4   1  -5    6.03    0.19
   5  -1   5    3.03    0.14
  -5  -1  -5    3.11    0.13
  -5  -1  -5    3.13    0.13
   5  -1   5    3.25    0.14
   5   1   5    3.82    0.17
   5   1   5    3.45    0.14
  -5   1  -5    3.35    0.14
  -5   1  -5    3.21    0.13
  -6  -1  -5    1.09    0.08
   6  -1   5    1.06    0.09
  -6  -1  -5    1.21    0.08
   6  -1   5    1.19    0.10
  -6   1  -5    1.30    0.09
   6   1   5    1.19    0.12
  -6   1  -5    1.24    0.09
   6   1   5    1.36    0.10
   7  -1   5    1.36    0.13
  -7  -1  -5    1.58    0.10
   7  -1   5    1.56    0.11
  -7  -1  -5    1.48    0.10
  -7   1  -5    1.46    0.10
  -7   1  -5    1.51    0.11
   7   1   5    1.55    0.14
   7   1   5    1.54    0.11
   8  -1   5    0.51    0.08
  -8  -1  -5    0.69    0.09
   8  -1   5    0.55    0.10
  -8  -1  -5    0.44    0.07
   8   1   5    0.58    0.09
  -8   1  -5    0.54    0.08
   8   1   5    0.68    0.11
  -8   1  -5    0.61    0.08
   9  -1   5    0.13    0.06
  -9  -1  -5    0.11    0.05
  -9  -1  -5    0.06    0.04
   9  -1   5    0.06    0.06
   9   1   5    0.03    0.05
  -9   1  -5   -0.02    0.04
  -9   1  -5    0.08    0.05
   9   1   5    0.07    0.05
  10  -1   5    0.21    0.07
  10  -1   5    0.14    0.07
  10   1   5    0.26    0.08
 -10   1  -5    0.28    0.06
 -10   1  -5    0.06    0.06
  10  -2  -5    0.69    0.13
  10  -2  -5    0.53    0.08
 -10  -2   5    0.51    0.09
 -10   2   5    0.57    0.10
  10   2  -5    0.54    0.10
   9  -2  -5    0.97    0.14
   9  -2  -5    0.96    0.11
  -9  -2   5    0.98    0.12
   9   2  -5    0.91    0.12
  -9   2   5    1.00    0.13
   8  -2  -5    1.36    0.11
   8  -2  -5    1.08    0.14
  -8  -2   5    1.35    0.13
  -8   2   5    1.15    0.12
   8   2  -5    1.37    0.13
   7  -2  -5    0.62    0.07
   7  -2  -5    0.73    0.11
   7  -2  -5    0.70    0.09
  -7  -2   5    0.73    0.09
   7   2  -5    0.75    0.09
  -7   2   5    0.75    0.09
   6  -2  -5   40.37    1.01
  -6  -2   5   40.41    1.04
   6  -2  -5   41.34    1.04
   6  -2  -5   40.49    1.08
  -6   2   5   41.68    1.04
   6   2  -5   39.27    1.04
   5  -2  -5    2.32    0.12
   5  -2  -5    2.47    0.15
  -5  -2   5    2.64    0.16
   5  -2  -5    2.41    0.11
  -5  -2   5    2.41    0.12
  -5   2   5    2.29    0.12
   5   2  -5    2.35    0.11
   5   2  -5    2.24    0.12
   4  -2  -5   37.29    0.92
  -4  -2   5   36.87    0.97
   4  -2  -5   37.04    0.95
   4  -2  -5   38.63    0.90
  -4  -2   5   36.95    0.93
   4   2  -5   35.82    0.92
   4   2  -5   36.14    0.91
  -4   2   5   36.60    0.90
  -4   2   5   36.35    0.92
   3  -2  -5  140.40    3.41
  -3  -2   5  144.57    3.39
   3  -2  -5  153.19    3.36
  -3  -2   5  143.95    3.42
   3  -2  -5  144.63    3.39
   3   2  -5  141.66    3.38
   3   2  -5  141.22    3.38
  -3   2   5  142.92    3.39
  -3   2   5  143.85    3.37
   2  -2  -5   10.35    0.29
  -2  -2   5   10.41    0.29
   2  -2  -5   10.56    0.26
   2  -2  -5   10.71    0.31
  -2  -2   5   10.44    0.29
  -2  -2   5   10.12    0.31
  -2   2   5   10.48    0.29
  -2   2   5   10.65    0.29
   2   2  -5   10.49    0.29
   2   2  -5    9.52    0.29
   1  -2  -5   14.72    0.38
   1  -2  -5   14.60    0.40
  -1  -2   5   14.39    0.38
  -1  -2   5   14.70    0.38
  -1  -2   5   14.49    0.39
  -1   2   5   15.00    0.39
  -1   2   5   14.36    0.38
   1   2  -5   14.52    0.38
   1   2  -5   14.84    0.39
   0  -2  -5   26.84    0.70
   0  -2   5   27.08    0.66
   0  -2   5   27.69    0.68
   0  -2   5   29.91    0.66
   0  -2  -5   26.49    0.67
   0  -2   5   27.48    0.66
   0  -2   5   27.16    0.68
   0   2   5   27.61    0.69
   0   2  -5   27.46    0.67
   0   2  -5   27.05    0.68
   0   2   5   27.44    0.67
  -1  -2  -5   66.65    1.57
  -1  -2  -5   68.05    1.57
  -1  -2  -5   66.31    1.60
  -1  -2  -5   65.95    1.56
  -1   2  -5   66.05    1.56
  -1   2  -5   65.56    1.58
   1   2   5   65.55    1.58
   1   2   5   67.74    1.55
  -1   2  -5   64.24    1.57
   1   2   5   66.15    1.60
  -1   2  -5   66.41    1.56
  -2  -2  -5   25.21    0.63
  -2  -2  -5   25.45    0.63
  -2  -2  -5   26.07    0.67
  -2  -2  -5   25.08    0.63
  -2   2  -5   24.64    0.63
  -2   2  -5   24.81    0.63
   2   2   5   26.20    0.67
   2   2   5   25.69    0.64
  -2   2  -5   26.04    0.63
  -2   2  -5   24.87    0.62
   2   2   5   25.64    0.63
  -3  -2  -5    5.60    0.21
   3  -2   5    5.12    0.14
   3  -2   5    5.18    0.16
  -3  -2  -5    5.04    0.17
  -3  -2  -5    5.38    0.17
   3  -2   5    5.28    0.14
   3   2   5    4.87    0.17
  -3   2  -5    5.27    0.16
  -3   2  -5    5.15    0.17
   3   2   5    5.41    0.21
   3   2   5    5.46    0.17
  -3   2  -5    5.33    0.17
  -4  -2  -5   23.73    0.61
   4  -2   5   22.36    0.60
   4  -2   5   24.05    0.61
  -4  -2  -5   23.87    0.61
   4   2   5   23.85    0.62
  -4   2  -5   23.51    0.62
   4   2   5   23.95    0.61
  -4   2  -5   23.47    0.62
   4   2   5   24.09    0.66
  -4   2  -5   25.54    0.60
  -5  -2  -5    0.07    0.03
  -5  -2  -5    0.09    0.03
   5  -2   5    0.01    0.03
   5  -2   5    0.04    0.03
   5   2   5    0.06    0.03
   5   2   5    0.02    0.04
  -5   2  -5    0.02    0.03
  -5   2  -5    0.03    0.03
   6  -2   5    9.00    0.29
  -6  -2  -5    9.28    0.28
   6  -2   5    8.94    0.30
  -6  -2  -5    9.04    0.29
   6   2   5    8.87    0.30
  -6   2  -5    9.60    0.30
   6   2   5    8.78    0.34
  -6   2  -5    8.70    0.30
   7  -2   5    4.03    0.20
  -7  -2  -5    4.29    0.18
   7  -2   5    3.76    0.17
  -7  -2  -5    3.64    0.16
   7   2   5    3.50    0.22
  -7   2  -5    4.24    0.18
  -7   2  -5    4.01    0.19
   7   2   5    4.00    0.19
  -8  -2  -5    0.22    0.05
   8  -2   5    0.16    0.05
   8  -2   5    0.23    0.07
  -8  -2  -5    0.24    0.05
  -8   2  -5    0.16    0.05
  -8   2  -5    0.08    0.06
   8   2   5    0.22    0.06
   9  -2   5    0.26    0.08
  -9  -2  -5    0.40    0.07
   9  -2   5    0.34    0.07
  -9   2  -5    0.32    0.07
  -9   2  -5    0.38    0.08
   9   2   5    0.33    0.08
  10  -2   5   -0.05    0.05
  10  -2   5    0.11    0.05
 -10   2  -5    0.06    0.03
  10   2   5    0.04    0.04
 -10   2  -5    0.05    0.06
   9  -3  -5    0.13    0.07
  -9  -3   5    0.13    0.06
   9  -3  -5    0.17    0.07
   9   3  -5    0.18    0.07
  -9   3   5    0.11    0.06
  -8  -3   5    0.08    0.05
   8  -3  -5    0.05    0.05
   8  -3  -5    0.06    0.06
   8   3  -5    0.06    0.05
  -8   3   5    0.13    0.06
   7  -3  -5    7.87    0.30
   7  -3  -5    8.60    0.34
  -7  -3   5    8.50    0.31
  -7   3   5    7.44    0.30
   7   3  -5    8.16    0.30
   6  -3  -5    0.62    0.10
  -6  -3   5    0.76    0.09
   6  -3  -5    0.58    0.08
   6   3  -5    0.48    0.07
  -6   3   5    0.63    0.08
   5  -3  -5   17.15    0.48
   5  -3  -5   16.65    0.51
  -5  -3   5   16.71    0.54
  -5  -3   5   16.68    0.48
   5   3  -5   16.41    0.48
   5   3  -5   16.25    0.47
  -5   3   5   16.85    0.48
  -4  -3   5    0.70    0.10
  -4  -3   5    0.66    0.08
   4  -3  -5    0.78    0.09
   4  -3  -5    0.75    0.08
  -4   3   5    0.65    0.07
   4   3  -5    0.64    0.07
  -4   3   5    0.69    0.06
   4   3  -5    0.63    0.07
  -3  -3   5    8.08    0.28
   3  -3  -5    7.30    0.27
  -3  -3   5    8.11    0.25
   3   3  -5    7.91    0.24
  -3   3   5    7.88    0.25
  -3   3   5    8.09    0.25
   3   3  -5    7.95    0.26
   2  -3  -5    4.90    0.19
  -2  -3   5    4.73    0.17
   2  -3  -5    4.71    0.17
  -2  -3   5    4.75    0.19
  -2  -3   5    4.89    0.17
  -2   3   5    4.42    0.16
   2   3  -5    4.77    0.16
  -2   3   5    4.35    0.16
   2   3  -5    4.55    0.17
  -1  -3   5   20.96    0.54
  -1  -3   5   20.48    0.55
   1  -3  -5   21.76    0.54
   1  -3  -5   19.92    0.56
  -1  -3   5   21.84    0.50
  -1  -3   5   19.97    0.55
   1   3  -5   20.54    0.55
   1   3  -5   21.16    0.53
  -1   3   5   20.71    0.55
  -1   3   5   19.80    0.53
   0  -3   5    6.42    0.21
   0  -3   5    6.88    0.19
   0  -3   5    7.29    0.20
   0  -3  -5    6.55    0.24
   0  -3  -5    6.92    0.21
   0  -3   5    6.72    0.22
   0  -3   5    6.74    0.20
   0   3   5    6.68    0.21
   0   3  -5    6.54    0.22
   0   3   5    6.47    0.22
   0   3  -5    6.99    0.20
   1  -3   5    0.20    0.03
  -1  -3  -5    0.17    0.03
  -1  -3  -5    0.23    0.05
  -1  -3  -5    0.19    0.03
   1  -3   5    0.22    0.03
   1  -3   5    0.19    0.03
  -1  -3  -5    0.19    0.03
   1   3   5    0.23    0.05
  -1   3  -5    0.15    0.04
   1   3   5    0.21    0.02
  -1   3  -5    0.15    0.03
  -1   3  -5    0.17    0.04
  -2  -3  -5    0.04    0.02
  -2  -3  -5    0.08    0.03
  -2  -3  -5    0.05    0.03
  -2  -3  -5    0.10    0.04
   2  -3   5    0.00    0.02
  -2   3  -5    0.04    0.03
   2   3   5    0.02    0.02
  -2   3  -5    0.05    0.02
  -2   3  -5    0.03    0.02
   2   3   5    0.02    0.03
  -3  -3  -5    0.54    0.05
  -3  -3  -5    0.48    0.06
   3  -3   5    0.61    0.04
   3  -3   5    0.60    0.04
   3  -3   5    0.64    0.05
  -3  -3  -5    0.57    0.09
  -3   3  -5    0.55    0.06
  -3   3  -5    0.57    0.06
   3   3   5    0.65    0.06
  -3   3  -5    0.72    0.07
   3   3   5    0.54    0.06
  -4  -3  -5    0.05    0.03
   4  -3   5    0.02    0.02
   4  -3   5    0.02    0.02
  -4  -3  -5    0.03    0.03
  -4   3  -5    0.01    0.03
  -4   3  -5    0.01    0.03
   4   3   5    0.02    0.03
   4   3   5    0.00    0.03
   5  -3   5    5.73    0.20
   5  -3   5    5.69    0.20
  -5  -3  -5    5.62    0.20
  -5  -3  -5    5.69    0.21
   5   3   5    5.58    0.21
  -5   3  -5    5.52    0.21
   5   3   5    5.58    0.20
  -5   3  -5    5.83    0.22
  -6  -3  -5    1.74    0.11
  -6  -3  -5    1.84    0.10
   6  -3   5    1.56    0.10
   6  -3   5    1.80    0.12
   6   3   5    1.65    0.11
  -6   3  -5    1.77    0.11
  -6   3  -5    1.75    0.12
   7  -3   5    0.00    0.04
  -7  -3  -5   -0.01    0.03
  -7   3  -5   -0.02    0.04
   7   3   5    0.07    0.05
  -7   3  -5   -0.05    0.03
  -8  -3  -5    2.03    0.13
   8  -3   5    2.10    0.16
   8   3   5    2.17    0.15
  -8   3  -5    2.26    0.15
  -8   3  -5    2.35    0.16
   9  -3   5    0.07    0.06
  -9   3  -5    0.04    0.05
   9   3   5    0.10    0.05
  -9   3  -5    0.14    0.06
  -9  -4   5    0.90    0.13
   9  -4  -5    0.68    0.11
   9  -4  -5    0.97    0.13
   9   4  -5    0.83    0.12
   8  -4  -5    0.92    0.12
   8  -4  -5    0.94    0.15
  -8  -4   5    1.01    0.13
   8   4  -5    1.32    0.13
  -8   4   5    1.11    0.13
   7  -4  -5    0.03    0.05
  -7  -4   5    0.02    0.04
   7  -4  -5    0.00    0.04
  -7   4   5    0.00    0.04
   7   4  -5   -0.01    0.03
  -6  -4   5    0.25    0.07
   6  -4  -5    0.37    0.09
   6  -4  -5    0.33    0.07
  -6   4   5    0.34    0.07
   6   4  -5    0.31    0.06
   5  -4  -5    0.10    0.06
  -5  -4   5    0.10    0.06
   5  -4  -5    0.12    0.05
  -5  -4   5    0.07    0.05
  -5   4   5    0.15    0.05
   5   4  -5    0.13    0.04
   5   4  -5    0.17    0.05
   4  -4  -5    4.82    0.20
   4  -4  -5    5.08    0.22
  -4  -4   5    5.02    0.24
  -4  -4   5    4.80    0.20
   4   4  -5    4.88    0.19
   4   4  -5    4.72    0.20
  -4   4   5    4.95    0.19
  -4   4   5    4.80    0.20
  -3  -4   5    2.76    0.14
  -3  -4   5    2.56    0.14
  -3  -4   5    2.76    0.16
   3  -4  -5    2.97    0.14
   3  -4  -5    2.93    0.16
   3   4  -5    2.65    0.12
  -3   4   5    2.53    0.13
   3   4  -5    2.60    0.14
   2  -4  -5    6.20    0.24
  -2  -4   5    6.32    0.23
  -2  -4   5    6.41    0.23
   2  -4  -5    6.01    0.22
  -2  -4   5    6.32    0.24
   2   4  -5    6.59    0.20
  -2   4   5    6.20    0.23
   2   4  -5    6.02    0.23
  -2   4   5    6.22    0.22
   1  -4  -5    0.01    0.03
  -1  -4   5    0.02    0.03
  -1  -4   5    0.01    0.03
   1  -4  -5    0.01    0.04
  -1  -4   5    0.05    0.03
  -1   4   5    0.00    0.03
  -1   4   5    0.00    0.02
   1   4  -5    0.02    0.02
   1   4  -5    0.01    0.03
   0  -4   5    0.00    0.02
   0  -4   5    0.05    0.03
   0  -4   5    0.06    0.03
   0  -4  -5    0.04    0.04
   0  -4   5    0.05    0.03
   0  -4  -5    0.04    0.03
   0   4   5    0.04    0.03
   0   4  -5    0.03    0.03
   0   4   5    0.00    0.03
   0   4  -5    0.00    0.02
   1  -4   5    2.86    0.12
  -1  -4  -5    2.96    0.16
  -1  -4  -5    2.90    0.13
  -1  -4  -5    2.98    0.13
  -1  -4  -5    3.01    0.13
   1  -4   5    3.01    0.12
   1   4   5    2.83    0.14
  -1   4  -5    3.03    0.14
  -1   4  -5    2.78    0.14
   2  -4   5    0.62    0.06
  -2  -4  -5    0.75    0.10
  -2  -4  -5    0.74    0.08
  -2  -4  -5    0.70    0.07
   2  -4   5    0.71    0.07
  -2  -4  -5    0.72    0.07
  -2   4  -5    0.62    0.07
  -2   4  -5    0.78    0.08
   2   4   5    0.73    0.09
  -3  -4  -5    5.33    0.20
  -3  -4  -5    5.31    0.18
   3  -4   5    4.87    0.17
  -3  -4  -5    5.16    0.24
   3  -4   5    5.18    0.19
  -3  -4  -5    5.56    0.20
  -3   4  -5    5.09    0.20
   3   4   5    4.96    0.21
  -3   4  -5    5.45    0.20
   4  -4   5    0.04    0.04
  -4  -4  -5    0.00    0.03
  -4  -4  -5    0.05    0.03
   4  -4   5   -0.01    0.03
   4   4   5    0.03    0.04
   4   4   5    0.06    0.03
  -4   4  -5    0.05    0.04
   5  -4   5    3.03    0.16
   5  -4   5    2.68    0.13
  -5  -4  -5    2.82    0.14
   5   4   5    2.80    0.14
   5   4   5    2.81    0.15
  -5   4  -5    2.86    0.15
  -6  -4  -5    0.49    0.08
   6  -4   5    0.48    0.07
   6  -4   5    0.45    0.08
   6   4   5    0.53    0.08
  -6   4  -5    0.41    0.07
   7  -4   5    4.13    0.21
   7  -4   5    3.94    0.20
  -7  -4  -5    4.07    0.19
   7   4   5    4.38    0.20
  -7   4  -5    4.06    0.20
   8  -4   5    0.75    0.11
  -8  -4  -5    0.80    0.10
   8  -4   5    0.80    0.12
  -8   4  -5    0.71    0.10
   8   4   5    0.81    0.11
   9   4   5    4.17    0.22
  -9   4  -5    3.75    0.20
  -8  -5   5    0.06    0.05
   8  -5  -5    0.03    0.05
   8  -5  -5   -0.10    0.04
   8   5  -5    0.06    0.04
  -8   5   5    0.05    0.06
   7  -5  -5    0.11    0.06
  -7  -5   5    0.16    0.06
   7  -5  -5    0.18    0.07
  -7   5   5    0.11    0.06
   7   5  -5    0.06    0.04
  -6  -5   5    0.31    0.08
   6  -5  -5    0.21    0.08
   6  -5  -5    0.30    0.08
  -6   5   5    0.17    0.06
   6   5  -5    0.33    0.06
   5  -5  -5    0.01    0.05
   5  -5  -5   -0.02    0.04
  -5  -5   5    0.11    0.06
  -5  -5   5    0.04    0.05
   5   5  -5    0.02    0.04
   5   5  -5    0.00    0.03
  -5   5   5   -0.01    0.04
  -4  -5   5    5.68    0.27
   4  -5  -5    5.58    0.23
  -4  -5   5    5.41    0.23
   4  -5  -5    5.16    0.25
  -4   5   5    5.00    0.22
   4   5  -5    5.35    0.23
  -4   5   5    5.60    0.23
  -3  -5   5    0.78    0.11
   3  -5  -5    0.68    0.09
  -3  -5   5    0.57    0.08
  -3  -5   5    0.64    0.09
   3  -5  -5    0.72    0.10
  -3   5   5    0.82    0.09
  -3   5   5    0.76    0.09
   3   5  -5    0.70    0.09
  -2  -5   5    1.11    0.11
   2  -5  -5    1.24    0.13
  -2  -5   5    1.05    0.11
   2  -5  -5    1.08    0.10
  -2  -5   5    1.23    0.13
  -2   5   5    1.09    0.10
   2   5  -5    1.02    0.11
  -2   5   5    1.07    0.10
   1  -5  -5    1.08    0.10
   1  -5  -5    1.15    0.12
  -1  -5   5    1.09    0.11
  -1  -5   5    1.06    0.11
  -1  -5   5    1.13    0.11
   1   5  -5    1.08    0.11
  -1   5   5    0.99    0.10
  -1   5   5    1.11    0.09
   0  -5  -5    2.37    0.13
   0  -5   5    2.33    0.14
   0  -5  -5    2.66    0.16
   0  -5  -5    2.20    0.13
   0  -5  -5    2.28    0.12
   0  -5   5    2.36    0.14
   0  -5   5    2.45    0.14
   0   5  -5    2.48    0.14
   0   5   5    2.43    0.14
  -1  -5  -5    2.83    0.15
  -1  -5  -5    2.64    0.18
  -1  -5  -5    3.18    0.15
  -1  -5  -5    3.17    0.14
   1   5   5    2.93    0.16
  -1   5  -5    2.99    0.15
  -1   5  -5    2.85    0.16
  -2  -5  -5   18.51    0.50
  -2  -5  -5   18.40    0.52
   2  -5   5   18.77    0.50
   2  -5   5   18.14    0.50
  -2  -5  -5   17.74    0.52
  -2  -5  -5   18.44    0.58
  -2   5  -5   17.77    0.53
   2   5   5   17.51    0.54
  -2   5  -5   18.73    0.54
   3  -5   5    0.59    0.07
  -3  -5  -5    0.71    0.11
  -3  -5  -5    0.66    0.08
  -3  -5  -5    0.65    0.08
   3  -5   5    0.74    0.08
  -3   5  -5    0.67    0.09
   3   5   5    0.69    0.10
  -3   5  -5    0.66    0.08
   4  -5   5    0.74    0.09
  -4  -5  -5    0.61    0.08
   4  -5   5    0.74    0.08
   4   5   5    0.53    0.09
  -4   5  -5    0.74    0.09
   5  -5   5    2.74    0.15
  -5  -5  -5    2.80    0.16
   5  -5   5    2.83    0.16
   5   5   5    3.06    0.17
  -5   5  -5    3.15    0.17
   6  -5   5    3.69    0.18
   6  -5   5    4.21    0.21
  -6  -5  -5    3.50    0.18
  -6   5  -5    3.70    0.19
   7  -5   5    0.02    0.05
  -7  -5  -5   -0.06    0.02
   7  -5   5   -0.10    0.04
  -7   5  -5    0.09    0.05
   8  -5   5    7.27    0.36
  -8   5  -5    7.06    0.30
  -6  -6   5    0.11    0.07
   6  -6  -5    0.22    0.07
   6  -6  -5    0.32    0.09
  -6   6   5    0.18    0.06
   5  -6  -5    1.25    0.16
  -5  -6   5    1.00    0.13
  -5  -6   5    1.10    0.16
   5  -6  -5    0.85    0.12
   5   6  -5    1.10    0.13
  -5   6   5    0.96    0.12
  -4  -6   5    0.23    0.07
   4  -6  -5    0.34    0.08
   4  -6  -5    0.44    0.09
  -4  -6   5    0.36    0.10
   4   6  -5    0.39    0.09
  -4   6   5    0.32    0.07
  -3  -6   5    0.06    0.05
   3  -6  -5    0.04    0.05
  -3  -6   5    0.11    0.06
  -3  -6   5    0.02    0.04
   3  -6  -5    0.04    0.05
   3   6  -5    0.01    0.05
  -3   6   5    0.09    0.05
  -3   6   5    0.13    0.05
  -2  -6   5    2.80    0.17
   2  -6  -5    2.68    0.15
  -2  -6   5    2.66    0.17
  -2  -6   5    2.59    0.18
   2  -6  -5    2.80    0.19
  -2   6   5    2.48    0.15
   2   6  -5    2.71    0.17
  -2   6   5    2.61    0.16
  -1  -6   5    4.87    0.24
  -1  -6   5    4.92    0.23
   1  -6  -5    4.83    0.21
  -1  -6   5    4.88    0.22
   1  -6  -5    4.95    0.25
  -1   6   5    5.33    0.24
  -1   6   5    5.05    0.22
   1   6  -5    4.70    0.23
   0  -6  -5    0.04    0.04
   0  -6   5    0.03    0.05
   0  -6  -5    0.09    0.05
   0  -6  -5    0.02    0.03
   0  -6   5    0.01    0.05
   0  -6   5    0.02    0.05
   0  -6  -5    0.02    0.05
   0   6   5    0.05    0.05
   0   6  -5   -0.01    0.04
   1  -6   5    0.14    0.06
  -1  -6  -5    0.14    0.07
   1  -6   5    0.09    0.05
  -1  -6  -5    0.22    0.06
  -1  -6  -5    0.10    0.05
   1  -6   5    0.19    0.06
  -1   6  -5    0.10    0.06
   1   6   5    0.14    0.06
   2  -6   5    2.79    0.16
  -2  -6  -5    2.86    0.16
  -2  -6  -5    2.75    0.16
  -2  -6  -5    3.05    0.20
   2   6   5    2.85    0.18
  -2   6  -5    3.06    0.17
  -2   6  -5    2.80    0.16
  -3  -6  -5    2.18    0.14
  -3  -6  -5    2.53    0.15
   3  -6   5    2.05    0.13
  -3   6  -5    2.38    0.15
   3   6   5    2.20    0.16
  -3   6  -5    2.47    0.15
   4  -6   5    3.20    0.17
  -4  -6  -5    3.17    0.17
   4  -6   5    3.06    0.16
   4   6   5    3.27    0.20
  -4   6  -5    3.40    0.19
   5  -6   5    0.93    0.11
  -5  -6  -5    1.20    0.13
   5  -6   5    1.04    0.11
  -5   6  -5    1.19    0.13
   5   6   5    0.81    0.11
   6  -6   5    1.05    0.12
   6  -6   5    0.98    0.11
  -6  -6  -5    0.66    0.09
  -6   6  -5    0.77    0.11
  -4  -7   5    1.71    0.20
   4  -7  -5    1.56    0.18
   4  -7  -5    1.75    0.14
  -4  -7   5    1.64    0.16
   4   7  -5    1.84    0.16
  -4   7   5    1.60    0.16
  -3  -7   5    0.68    0.11
  -3  -7   5    0.83    0.12
  -3  -7   5    0.76    0.13
   3  -7  -5    0.55    0.09
   3  -7  -5    0.61    0.12
  -3   7   5    0.45    0.09
  -3   7   5    0.75    0.10
   3   7  -5    0.53    0.10
  -2  -7   5    1.07    0.13
  -2  -7   5    0.93    0.14
   2  -7  -5    1.11    0.12
   2  -7  -5    1.06    0.15
  -2  -7   5    0.90    0.13
   2   7  -5    0.90    0.12
  -2   7   5    1.08    0.13
  -2   7   5    1.20    0.13
   1  -7  -5    0.62    0.11
   1  -7  -5    0.72    0.11
   1  -7  -5    0.55    0.09
  -1  -7   5    0.41    0.09
  -1  -7   5    0.49    0.10
  -1  -7   5    0.71    0.11
  -1   7   5    0.47    0.09
   1   7  -5    0.46    0.10
   0  -7   5    0.04    0.06
   0  -7  -5    0.15    0.07
   0  -7   5    0.09    0.06
   0  -7  -5    0.23    0.07
   0  -7   5    0.19    0.07
   0  -7  -5    0.12    0.06
   0   7   5    0.18    0.07
   0   7  -5    0.16    0.06
  -1  -7  -5    1.21    0.13
  -1  -7  -5    1.09    0.13
   1  -7   5    1.12    0.13
  -1  -7  -5    1.46    0.18
   1  -7   5    1.12    0.14
   1  -7   5    1.20    0.14
  -1   7  -5    1.52    0.13
   1   7   5    1.55    0.17
   2  -7   5    1.91    0.16
  -2  -7  -5    1.59    0.19
  -2  -7  -5    1.61    0.13
   2  -7   5    1.66    0.17
  -2  -7  -5    1.49    0.15
   2  -7   5    1.77    0.14
   2   7   5    1.48    0.16
  -2   7  -5    1.77    0.14
   3  -7   5    1.26    0.13
  -3  -7  -5    1.24    0.13
  -3  -7  -5    1.27    0.14
   3   7   5    1.08    0.14
  -3   7  -5    1.00    0.12
  -3   7  -5    1.21    0.13
  -4  -7  -5    0.69    0.10
   4  -7   5    0.61    0.09
   4   7   5    0.65    0.11
  -4   7  -5    0.54    0.09
 -10   0   6    2.20    0.16
  10   0  -6    2.44    0.16
   9   0  -6    4.60    0.22
  -9   0   6    4.67    0.22
   8   0  -6    3.37    0.17
  -8   0   6    3.05    0.17
   7   0  -6   29.18    0.75
  -7   0   6   27.88    0.78
   7   0  -6   30.04    0.84
   7   0  -6   28.93    0.78
   6   0  -6   18.09    0.56
   6   0  -6   17.81    0.48
   6   0  -6   18.38    0.51
  -6   0   6   17.89    0.51
   5   0  -6    8.13    0.29
   5   0  -6    7.86    0.24
   5   0  -6    7.99    0.25
   4   0  -6    4.67    0.16
   4   0  -6    4.62    0.19
  -4   0   6    4.88    0.14
  -4   0   6    4.43    0.16
   4   0  -6    4.81    0.15
   3   0  -6    0.37    0.04
  -3   0   6    0.32    0.05
  -3   0   6    0.39    0.04
  -3   0   6    0.29    0.04
   3   0  -6    0.27    0.04
   3   0  -6    0.34    0.03
   2   0  -6  270.12    6.20
  -2   0   6  266.29    6.49
   2   0  -6  268.04    6.37
  -2   0   6  265.69    6.20
  -2   0   6  268.03    6.17
   2   0  -6  257.52    6.41
  -1   0   6  198.65    4.71
   1   0  -6  196.72    4.79
  -1   0   6  206.87    4.62
   1   0  -6  194.04    4.87
  -1   0   6  196.12    4.63
   0   0  -6  878.21   20.89
   0   0   6  863.85   21.18
   0   0   6 1000.00   21.27
   0   0  -6  802.99   20.99
   1   0   6    9.39    0.25
  -1   0  -6    9.20    0.24
   1   0   6    9.39    0.25
  -2   0  -6    1.36    0.06
  -2   0  -6    1.50    0.05
   2   0   6    1.43    0.06
   2   0   6    1.38    0.07
   3   0   6    3.70    0.11
  -3   0  -6    3.45    0.11
  -3   0  -6    3.32    0.12
   3   0   6    3.45    0.13
   3   0   6    3.34    0.12
   4   0   6   14.82    0.42
   4   0   6   14.86    0.43
  -4   0  -6   15.23    0.40
  -4   0  -6   15.20    0.41
   4   0   6   16.82    0.39
  -5   0  -6   77.00    1.87
   5   0   6   78.85    1.88
  -5   0  -6   77.89    1.86
   5   0   6   78.11    1.90
   6   0   6    7.69    0.28
   6   0   6    7.31    0.26
  -6   0  -6    7.66    0.24
  -6   0  -6    7.44    0.25
  -7   0  -6    4.66    0.19
  -7   0  -6    4.48    0.18
   7   0   6    4.51    0.22
   7   0   6    4.48    0.20
   8   0   6    2.30    0.17
  -8   0  -6    2.59    0.14
  -8   0  -6    2.39    0.14
   8   0   6    2.45    0.15
  -9   0  -6    0.52    0.08
   9   0   6    0.55    0.11
  -9   0  -6    0.56    0.09
   9   0   6    0.43    0.08
  10   0   6    0.12    0.07
 -10   0  -6    0.13    0.06
  10   0   6    0.19    0.07
  10  -1  -6    0.51    0.08
 -10  -1   6    0.46    0.09
  10   1  -6    0.57    0.10
 -10   1   6    0.46    0.09
   9  -1  -6    0.64    0.09
  -9  -1   6    0.58    0.09
   9  -1  -6    0.67    0.09
   9   1  -6    0.73    0.10
  -9   1   6    0.45    0.09
  -8  -1   6    2.06    0.14
   8  -1  -6    1.91    0.12
   8  -1  -6    1.97    0.16
   8  -1  -6    1.99    0.13
  -8   1   6    1.94    0.14
   8   1  -6    1.87    0.14
   7  -1  -6    0.11    0.06
   7  -1  -6    0.00    0.03
  -7  -1   6   -0.01    0.03
   7  -1  -6   -0.02    0.03
   7   1  -6   -0.02    0.03
  -7   1   6   -0.01    0.04
   6  -1  -6   17.15    0.52
  -6  -1   6   15.31    0.46
   6  -1  -6   16.05    0.45
   6  -1  -6   16.50    0.46
   6   1  -6   15.95    0.47
  -6   1   6   16.00    0.47
  -5  -1   6    3.56    0.12
   5  -1  -6    3.45    0.17
  -5  -1   6    3.43    0.20
   5  -1  -6    3.32    0.14
  -5  -1   6    3.34    0.14
   5  -1  -6    3.36    0.14
  -5  -1   6    3.58    0.14
   5   1  -6    3.48    0.17
   5   1  -6    3.24    0.14
   4  -1  -6    0.10    0.03
  -4  -1   6    0.12    0.03
   4  -1  -6    0.10    0.03
  -4  -1   6    0.09    0.04
   4  -1  -6    0.12    0.04
   4   1  -6    0.06    0.03
   4   1  -6    0.08    0.02
   4   1  -6    0.07    0.04
   4   1  -6    0.09    0.02
  -4   1   6    0.10    0.03
  -4   1   6    0.12    0.02
  -3  -1   6    4.09    0.14
   3  -1  -6    4.24    0.14
   3  -1  -6    4.10    0.16
  -3  -1   6    4.21    0.17
   3  -1  -6    4.36    0.14
   3   1  -6    4.34    0.12
   3   1  -6    4.07    0.14
   3   1  -6    4.45    0.14
   3   1  -6    4.44    0.17
  -3   1   6    4.03    0.13
  -3   1   6    3.83    0.14
   2  -1  -6   31.99    0.81
   2  -1  -6   31.81    0.79
  -2  -1   6   33.65    0.81
  -2  -1   6   32.06    0.79
   2  -1  -6   32.74    0.78
   2   1  -6   32.04    0.79
   2   1  -6   32.04    0.79
  -2   1   6   31.89    0.78
  -2   1   6   32.70    0.79
  -1  -1   6    7.50    0.22
   1  -1  -6    7.94    0.20
   1  -1  -6    7.74    0.21
  -1  -1   6    7.66    0.21
   1  -1  -6    7.69    0.23
  -1   1   6    7.65    0.20
   1   1  -6    7.73    0.22
  -1   1   6    7.81    0.23
   0  -1  -6    0.57    0.05
   0  -1  -6    0.50    0.03
   0  -1  -6    0.51    0.04
   0  -1   6    0.45    0.03
   0  -1   6    0.50    0.03
   0  -1   6    0.58    0.03
   0   1  -6    0.55    0.04
   0   1   6    0.59    0.05
   0   1  -6    0.54    0.04
   0   1  -6    0.58    0.03
  -1  -1  -6   16.61    0.40
  -1  -1  -6   16.05    0.41
   1   1   6   16.02    0.41
  -1   1  -6   16.01    0.40
  -1   1  -6   16.47    0.40
   1   1   6   15.98    0.43
  -1   1  -6   16.00    0.39
  -1   1  -6   15.78    0.41
  -2  -1  -6    0.05    0.02
  -2  -1  -6    0.01    0.01
   2   1   6    0.03    0.03
  -2   1  -6    0.03    0.02
   2   1   6    0.03    0.02
  -2   1  -6    0.05    0.02
   2   1   6    0.00    0.02
  -2   1  -6    0.01    0.01
  -2   1  -6    0.02    0.02
   3  -1   6    0.04    0.02
  -3  -1  -6    0.00    0.02
   3  -1   6    0.04    0.02
  -3  -1  -6    0.07    0.02
   3  -1   6    0.02    0.02
   3  -1   6    0.03    0.02
   3   1   6    0.02    0.02
   3   1   6    0.04    0.03
  -3   1  -6    0.03    0.02
   3   1   6    0.01    0.02
  -3   1  -6    0.03    0.02
   4  -1   6   23.88    0.55
   4  -1   6   22.45    0.59
   4  -1   6   23.03    0.58
  -4  -1  -6   22.32    0.57
  -4  -1  -6   22.24    0.58
  -4   1  -6   22.37    0.59
   4   1   6   22.18    0.59
  -4   1  -6   22.57    0.58
   4   1   6   23.48    0.57
   4   1   6   22.28    0.62
   5  -1   6    0.01    0.03
  -5  -1  -6   -0.02    0.02
   5  -1   6    0.04    0.03
  -5  -1  -6    0.04    0.03
  -5   1  -6    0.03    0.03
  -5   1  -6    0.01    0.02
   5   1   6   -0.04    0.02
   5   1   6    0.00    0.04
  -6  -1  -6    0.33    0.05
   6  -1   6    0.42    0.06
   6  -1   6    0.29    0.06
  -6  -1  -6    0.36    0.06
  -6   1  -6    0.45    0.06
   6   1   6    0.34    0.06
  -6   1  -6    0.45    0.07
   6   1   6    0.36    0.08
   7  -1   6    0.02    0.04
   7  -1   6   -0.01    0.04
  -7  -1  -6    0.05    0.03
  -7  -1  -6    0.10    0.04
   7   1   6    0.06    0.05
  -7   1  -6    0.12    0.05
   7   1   6    0.10    0.05
  -7   1  -6    0.01    0.03
   8  -1   6    0.32    0.08
   8  -1   6    0.20    0.06
  -8  -1  -6    0.27    0.06
  -8  -1  -6    0.22    0.05
  -8   1  -6    0.16    0.05
   8   1   6    0.30    0.08
  -8   1  -6    0.28    0.07
   8   1   6    0.27    0.07
   9  -1   6    1.22    0.15
  -9  -1  -6    1.23    0.12
  -9  -1  -6    1.32    0.10
   9  -1   6    1.22    0.13
  -9   1  -6    1.35    0.11
   9   1   6    1.62    0.15
   9   1   6    1.31    0.16
  -9   1  -6    1.33    0.13
  10  -1   6    0.02    0.05
  10  -1   6    0.05    0.05
 -10   1  -6    0.00    0.03
  10   1   6    0.11    0.06
 -10   1  -6    0.00    0.05
  10  -2  -6    0.23    0.06
 -10  -2   6    0.25    0.07
  10   2  -6    0.31    0.08
 -10   2   6    0.15    0.06
   9  -2  -6    0.55    0.11
  -9  -2   6    0.47    0.09
   9  -2  -6    0.36    0.07
   9   2  -6    0.30    0.08
  -9   2   6    0.37    0.08
  -8  -2   6    0.27    0.07
   8  -2  -6    0.38    0.09
   8  -2  -6    0.31    0.07
  -8   2   6    0.20    0.06
   8   2  -6    0.34    0.07
   7  -2  -6    4.73    0.24
   7  -2  -6    4.57    0.20
  -7  -2   6    4.52    0.21
   7  -2  -6    4.59    0.18
   7   2  -6    4.59    0.20
  -7   2   6    4.25    0.20
   6  -2  -6   -0.03    0.03
   6  -2  -6    0.00    0.03
  -6  -2   6    0.02    0.04
   6  -2  -6    0.10    0.06
  -6   2   6    0.05    0.04
   6   2  -6    0.03    0.04
   5  -2  -6    0.25    0.05
  -5  -2   6    0.24    0.05
   5  -2  -6    0.18    0.04
   5  -2  -6    0.18    0.06
  -5  -2   6    0.20    0.06
  -5   2   6    0.22    0.05
   5   2  -6    0.15    0.04
   5   2  -6    0.16    0.04
  -4  -2   6   12.82    0.38
   4  -2  -6   12.73    0.37
   4  -2  -6   13.29    0.41
   4  -2  -6   13.40    0.35
  -4  -2   6   12.74    0.41
   4   2  -6   13.31    0.38
   4   2  -6   13.87    0.37
  -4   2   6   13.50    0.35
  -4   2   6   13.02    0.37
   3  -2  -6   13.39    0.33
  -3  -2   6   13.30    0.39
  -3  -2   6   12.51    0.36
   3  -2  -6   12.39    0.38
  -3   2   6   12.59    0.35
  -3   2   6   12.95    0.36
   3   2  -6   12.61    0.35
   3   2  -6   12.67    0.35
   2  -2  -6    0.11    0.02
  -2  -2   6    0.05    0.03
  -2  -2   6    0.15    0.03
   2  -2  -6    0.09    0.03
   2  -2  -6    0.07    0.03
   2   2  -6    0.14    0.03
   2   2  -6    0.10    0.03
  -2   2   6    0.10    0.03
  -2   2   6    0.11    0.03
   1  -2  -6    7.44    0.22
  -1  -2   6    7.47    0.21
  -1  -2   6    7.57    0.22
  -1  -2   6    7.42    0.22
   1  -2  -6    7.28    0.24
  -1   2   6    6.97    0.22
  -1   2   6    7.25    0.21
   1   2  -6    7.30    0.21
   0  -2   6   28.37    0.65
   0  -2   6   27.18    0.67
   0  -2   6   26.73    0.65
   0  -2  -6   27.01    0.70
   0  -2   6   27.22    0.67
   0  -2  -6   26.71    0.67
   0   2  -6   26.87    0.67
   0   2   6   27.97    0.70
   0   2   6   27.19    0.66
   0   2   6   26.85    0.68
   0   2  -6   27.73    0.65
   0   2  -6   26.64    0.68
  -1  -2  -6  120.80    2.76
  -1  -2  -6  119.03    2.76
  -1  -2  -6  116.69    2.77
  -1  -2  -6  111.96    2.80
  -1   2  -6  119.63    2.76
   1   2   6  122.65    2.80
   1   2   6  120.69    2.75
  -1   2  -6  119.29    2.76
   1   2   6  114.65    2.78
  -1   2  -6  114.57    2.78
  -1   2  -6  118.93    2.77
  -2  -2  -6   12.96    0.33
  -2  -2  -6   12.89    0.33
  -2  -2  -6   12.31    0.34
  -2  -2  -6   13.11    0.38
   2   2   6   12.80    0.35
   2   2   6   12.48    0.33
  -2   2  -6   12.64    0.34
  -2   2  -6   12.50    0.34
  -2   2  -6   12.19    0.33
   2   2   6   12.66    0.37
  -2   2  -6   12.60    0.34
   3  -2   6   11.06    0.30
  -3  -2  -6   10.74    0.30
  -3  -2  -6   10.61    0.30
  -3  -2  -6   11.32    0.34
  -3   2  -6   11.01    0.31
  -3   2  -6   10.98    0.30
   3   2   6   10.99    0.30
   3   2   6   11.11    0.31
   3   2   6   10.70    0.34
  -3   2  -6   10.76    0.30
   4  -2   6    0.03    0.03
  -4  -2  -6    0.02    0.02
   4  -2   6    0.03    0.02
  -4  -2  -6    0.02    0.02
   4  -2   6    0.05    0.02
  -4   2  -6    0.00    0.03
  -4   2  -6   -0.03    0.02
   4   2   6    0.02    0.04
   4   2   6   -0.01    0.02
  -4   2  -6   -0.01    0.01
   4   2   6    0.03    0.03
  -5  -2  -6    0.11    0.03
   5  -2   6    0.08    0.04
  -5  -2  -6    0.12    0.03
   5  -2   6    0.10    0.04
   5   2   6    0.10    0.04
   5   2   6    0.05    0.05
  -5   2  -6    0.11    0.04
  -5   2  -6    0.08    0.04
   6  -2   6    3.29    0.15
  -6  -2  -6    3.13    0.14
   6  -2   6    3.02    0.14
  -6  -2  -6    3.13    0.14
  -6   2  -6    3.12    0.15
   6   2   6    3.10    0.15
  -6   2  -6    3.26    0.15
   6   2   6    2.96    0.18
   7  -2   6    0.82    0.10
   7  -2   6    0.80    0.09
  -7  -2  -6    0.84    0.09
  -7  -2  -6    0.83    0.09
  -7   2  -6    0.78    0.09
   7   2   6    0.88    0.12
   7   2   6    0.77    0.10
  -7   2  -6    0.72    0.09
   8  -2   6    0.06    0.06
  -8  -2  -6    0.08    0.04
   8  -2   6    0.05    0.04
  -8  -2  -6    0.06    0.03
   8   2   6    0.08    0.05
  -8   2  -6    0.08    0.05
  -8   2  -6    0.10    0.04
   9  -2   6    0.01    0.05
   9  -2   6    0.04    0.05
  -9   2  -6    0.12    0.04
   9   2   6    0.02    0.05
  -9   2  -6    0.01    0.05
  10  -2   6    0.02    0.05
  10  -2   6    0.02    0.05
 -10   2  -6    0.08    0.06
  10   2   6   -0.01    0.06
 -10   2  -6   -0.02    0.02
   9  -3  -6    0.90    0.12
   9  -3  -6    0.95    0.14
  -9  -3   6    0.88    0.12
  -9   3   6    1.06    0.13
   9   3  -6    0.79    0.11
   8  -3  -6    0.89    0.11
   8  -3  -6    0.81    0.13
  -8  -3   6    0.78    0.11
   8   3  -6    0.89    0.11
  -8   3   6    0.77    0.11
  -7  -3   6    0.17    0.06
   7  -3  -6    0.09    0.05
   7  -3  -6    0.08    0.06
  -7   3   6    0.13    0.05
   7   3  -6    0.07    0.05
  -6  -3   6    2.02    0.13
   6  -3  -6    2.03    0.13
   6  -3  -6    2.26    0.16
  -6   3   6    2.01    0.13
   6   3  -6    2.02    0.13
  -5  -3   6   24.54    0.67
  -5  -3   6   26.18    0.73
   5  -3  -6   25.18    0.71
   5  -3  -6   24.57    0.67
  -5   3   6   24.45    0.67
   5   3  -6   24.31    0.66
   5   3  -6   24.27    0.66
   4  -3  -6    7.32    0.28
   4  -3  -6    7.38    0.25
  -4  -3   6    7.82    0.26
  -4  -3   6    7.50    0.29
  -4   3   6    7.60    0.24
   4   3  -6    7.71    0.25
  -4   3   6    7.74    0.26
   4   3  -6    7.26    0.25
  -3  -3   6    0.24    0.05
   3  -3  -6    0.26    0.05
   3  -3  -6    0.23    0.05
  -3  -3   6    0.18    0.05
  -3   3   6    0.29    0.04
   3   3  -6    0.22    0.05
  -3   3   6    0.16    0.04
   3   3  -6    0.24    0.04
  -2  -3   6    2.60    0.12
  -2  -3   6    2.80    0.12
  -2  -3   6    2.68    0.13
   2  -3  -6    2.57    0.13
   2  -3  -6    2.70    0.12
   2   3  -6    2.69    0.13
  -2   3   6    2.67    0.11
   2   3  -6    2.67    0.11
  -2   3   6    2.70    0.12
  -1  -3   6    3.48    0.14
  -1  -3   6    3.76    0.14
   1  -3  -6    3.52    0.16
  -1  -3   6    3.82    0.14
  -1  -3   6    3.83    0.10
   1  -3  -6    3.38    0.14
   1   3  -6    3.81    0.13
  -1   3   6    3.50    0.14
   1   3  -6    3.59    0.15
  -1   3   6    3.64    0.13
   0  -3   6    9.03    0.27
   0  -3   6    8.75    0.25
   0  -3   6    9.30    0.24
   0  -3   6    9.20    0.27
   0  -3   6    9.52    0.26
   0  -3  -6    9.12    0.27
   0  -3  -6    9.35    0.30
   0   3   6    9.00    0.26
   0   3   6    8.81    0.28
   0   3  -6    9.29    0.25
   0   3  -6    9.01    0.28
  -1  -3  -6    1.87    0.11
   1  -3   6    1.71    0.06
   1  -3   6    1.60    0.07
  -1  -3  -6    1.69    0.09
  -1  -3  -6    1.74    0.09
  -1  -3  -6    1.64    0.08
   1  -3   6    1.72    0.06
   1   3   6    1.76    0.06
  -1   3  -6    1.71    0.09
  -1   3  -6    1.79    0.08
  -1   3  -6    1.41    0.09
  -2  -3  -6   46.85    1.15
  -2  -3  -6   47.98    1.21
  -2  -3  -6   46.91    1.15
  -2  -3  -6   46.92    1.15
  -2   3  -6   47.53    1.15
   2   3   6   50.08    1.23
  -2   3  -6   47.24    1.16
  -2   3  -6   47.13    1.16
  -2   3  -6   47.06    1.14
   2   3   6   46.26    1.13
   2   3   6   46.10    1.17
  -3  -3  -6    8.85    0.27
  -3  -3  -6    8.63    0.27
  -3  -3  -6    9.11    0.32
   3   3   6    9.10    0.26
  -3   3  -6    8.85    0.27
   3   3   6    8.90    0.28
  -3   3  -6    9.32    0.26
  -3   3  -6    8.82    0.27
  -3   3  -6    9.60    0.27
  -4  -3  -6    0.14    0.04
   4  -3   6    0.14    0.03
  -4  -3  -6    0.17    0.04
   4  -3   6    0.15    0.03
   4   3   6    0.13    0.04
   4   3   6    0.08    0.03
  -4   3  -6    0.16    0.04
  -4   3  -6    0.11    0.04
   5  -3   6   11.06    0.33
  -5  -3  -6   11.47    0.34
  -5  -3  -6   11.16    0.34
   5  -3   6   11.16    0.33
   5   3   6   11.51    0.34
   5   3   6   11.44    0.34
  -5   3  -6   11.37    0.35
  -5   3  -6   11.22    0.35
  -6  -3  -6    3.82    0.16
   6  -3   6    4.02    0.17
   6  -3   6    3.92    0.16
  -6  -3  -6    3.96    0.17
   6   3   6    4.02    0.18
  -6   3  -6    3.99    0.18
  -6   3  -6    4.05    0.18
  -7  -3  -6    0.69    0.08
   7  -3   6    0.66    0.09
  -7   3  -6    0.58    0.09
   7   3   6    0.65    0.09
  -7   3  -6    0.44    0.07
   8  -3   6    1.00    0.13
  -8   3  -6    1.04    0.12
   8   3   6    1.07    0.12
  -8   3  -6    1.18    0.12
   9  -3   6   -0.04    0.05
  -9   3  -6    0.02    0.04
   9   3   6    0.06    0.05
  -9   3  -6   -0.09    0.04
   9  -4  -6    3.36    0.25
   9  -4  -6    3.43    0.23
   9   4  -6    3.12    0.19
   8  -4  -6    1.69    0.19
   8  -4  -6    1.56    0.15
  -8  -4   6    1.72    0.16
   8   4  -6    1.72    0.13
  -8   4   6    1.62    0.14
   7  -4  -6    0.84    0.11
  -7  -4   6    0.64    0.10
   7  -4  -6    0.93    0.13
   7   4  -6    0.87    0.11
  -7   4   6    0.77    0.10
   6  -4  -6    2.42    0.17
   6  -4  -6    2.18    0.14
  -6  -4   6    2.14    0.14
  -6   4   6    2.17    0.14
   6   4  -6    2.42    0.14
  -5  -4   6    0.06    0.06
   5  -4  -6    0.04    0.04
  -5  -4   6    0.08    0.05
   5  -4  -6    0.01    0.04
   5   4  -6    0.05    0.04
  -5   4   6    0.02    0.04
   5   4  -6    0.03    0.03
  -4  -4   6    1.46    0.11
   4  -4  -6    1.41    0.11
  -4  -4   6    1.31    0.14
   4  -4  -6    1.68    0.13
   4   4  -6    1.72    0.10
  -4   4   6    1.42    0.11
   4   4  -6    1.37    0.11
  -4   4   6    1.48    0.10
   3  -4  -6   27.33    0.72
  -3  -4   6   26.37    0.76
  -3  -4   6   26.80    0.73
  -3  -4   6   27.56    0.73
   3  -4  -6   27.63    0.76
  -3   4   6   26.28    0.71
   3   4  -6   27.25    0.70
  -3   4   6   28.16    0.72
   3   4  -6   26.56    0.73
  -2  -4   6    2.39    0.13
   2  -4  -6    2.65    0.13
  -2  -4   6    2.46    0.15
   2  -4  -6    2.68    0.15
  -2  -4   6    2.66    0.13
  -2   4   6    2.86    0.14
  -2   4   6    2.47    0.12
   2   4  -6    2.75    0.14
   2   4  -6    2.82    0.12
   1  -4  -6    5.26    0.20
  -1  -4   6    5.38    0.20
  -1  -4   6    5.61    0.21
   1  -4  -6    5.92    0.23
  -1  -4   6    5.80    0.21
  -1   4   6    5.28    0.19
   1   4  -6    4.98    0.21
  -1   4   6    5.47    0.21
   1   4  -6    5.79    0.18
   0  -4   6    1.99    0.11
   0  -4   6    2.05    0.11
   0  -4  -6    2.05    0.13
   0  -4  -6    2.16    0.11
   0  -4   6    2.02    0.11
   0   4  -6    2.12    0.12
   0   4  -6    2.13    0.09
   0   4   6    2.08    0.10
   0   4   6    2.03    0.12
  -1  -4  -6    5.77    0.20
  -1  -4  -6    5.76    0.20
   1  -4   6    5.49    0.18
  -1  -4  -6    5.85    0.24
   1  -4   6    5.70    0.18
  -1  -4  -6    5.68    0.20
  -1   4  -6    5.54    0.22
  -1   4  -6    6.19    0.21
   1   4   6    5.96    0.22
  -2  -4  -6   27.35    0.71
   2  -4   6   26.63    0.70
   2  -4   6   26.68    0.67
  -2  -4  -6   28.08    0.71
  -2  -4  -6   27.37    0.77
  -2  -4  -6   27.08    0.70
  -2   4  -6   27.40    0.72
  -2   4  -6   27.50    0.71
   2   4   6   26.56    0.73
  -3  -4  -6    6.96    0.23
  -3  -4  -6    7.07    0.23
   3  -4   6    6.70    0.23
  -3  -4  -6    7.14    0.24
  -3  -4  -6    6.82    0.29
   3  -4   6    6.63    0.20
   3   4   6    6.46    0.25
  -3   4  -6    7.11    0.24
  -3   4  -6    6.76    0.24
   4  -4   6    0.09    0.04
   4  -4   6    0.10    0.03
  -4  -4  -6    0.07    0.04
  -4  -4  -6    0.08    0.04
  -4   4  -6    0.11    0.04
   4   4   6    0.07    0.04
   4   4   6    0.11    0.04
  -5  -4  -6    0.39    0.06
   5  -4   6    0.40    0.06
   5  -4   6    0.40    0.07
  -5   4  -6    0.46    0.07
   5   4   6    0.36    0.06
   5   4   6    0.37    0.06
   6  -4   6    0.14    0.05
   6  -4   6    0.11    0.05
  -6  -4  -6    0.04    0.03
  -6   4  -6    0.06    0.04
   6   4   6    0.17    0.05
  -7  -4  -6    0.28    0.06
   7  -4   6    0.35    0.07
   7  -4   6    0.27    0.07
  -7   4  -6    0.37    0.07
   7   4   6    0.24    0.06
   8  -4   6    1.15    0.13
   8  -4   6    1.18    0.14
  -8   4  -6    1.19    0.13
   8   4   6    1.20    0.13
  -8  -5   6    0.90    0.15
   8  -5  -6    1.14    0.16
   8   5  -6    1.01    0.12
   7  -5  -6    1.92    0.15
   7  -5  -6    1.83    0.16
  -7  -5   6    1.43    0.15
   7   5  -6    1.57    0.12
  -7   5   6    1.40    0.15
  -6  -5   6    0.65    0.10
   6  -5  -6    0.50    0.09
   6  -5  -6    0.65    0.12
   6   5  -6    0.40    0.07
  -6   5   6    0.55    0.09
  -5  -5   6   -0.02    0.05
   5  -5  -6    0.00    0.05
  -5  -5   6   -0.02    0.04
   5  -5  -6   -0.06    0.04
   5   5  -6    0.00    0.04
   5   5  -6    0.04    0.03
  -5   5   6    0.07    0.05
  -4  -5   6    3.10    0.20
   4  -5  -6    3.03    0.17
  -4  -5   6    3.19    0.17
   4  -5  -6    2.81    0.18
   4   5  -6    2.86    0.17
  -4   5   6    3.11    0.16
  -4   5   6    2.88    0.15
  -3  -5   6    0.80    0.10
   3  -5  -6    0.79    0.09
   3  -5  -6    0.81    0.11
  -3  -5   6    1.15    0.13
  -3  -5   6    0.87    0.10
   3   5  -6    0.71    0.10
  -3   5   6    1.06    0.09
  -3   5   6    0.74    0.09
  -2  -5   6    0.30    0.07
   2  -5  -6    0.33    0.08
  -2  -5   6    0.31    0.07
   2  -5  -6    0.38    0.06
  -2  -5   6    0.46    0.08
  -2   5   6    0.37    0.07
  -2   5   6    0.37    0.07
   2   5  -6    0.49    0.08
   1  -5  -6    3.58    0.16
  -1  -5   6    3.41    0.17
  -1  -5   6    3.63    0.17
  -1  -5   6    3.58    0.18
   1  -5  -6    3.98    0.20
  -1   5   6    3.66    0.18
  -1   5   6    3.62    0.16
   1   5  -6    3.64    0.18
   0  -5   6    0.41    0.07
   0  -5  -6    0.41    0.07
   0  -5   6    0.45    0.08
   0  -5   6    0.47    0.07
   0  -5  -6    0.34    0.07
   0  -5  -6    0.39    0.06
   0   5   6    0.22    0.05
   0   5   6    0.32    0.07
   0   5  -6    0.28    0.06
  -1  -5  -6    6.68    0.25
  -1  -5  -6    7.04    0.24
  -1  -5  -6    7.20    0.25
   1  -5   6    7.08    0.24
  -1  -5  -6    7.58    0.31
   1  -5   6    7.16    0.26
   1  -5   6    7.01    0.26
  -1   5  -6    6.90    0.27
   1   5   6    6.86    0.27
  -1   5  -6    7.30    0.26
   2  -5   6    3.29    0.15
  -2  -5  -6    3.35    0.16
  -2  -5  -6    3.34    0.15
  -2  -5  -6    3.46    0.16
  -2  -5  -6    3.10    0.19
   2  -5   6    3.42    0.15
   2   5   6    3.07    0.17
  -2   5  -6    3.30    0.16
  -2   5  -6    3.35    0.17
  -3  -5  -6    3.25    0.21
   3  -5   6    3.33    0.14
  -3  -5  -6    3.34    0.16
   3  -5   6    3.47    0.16
  -3  -5  -6    3.56    0.15
  -3  -5  -6    3.71    0.17
  -3   5  -6    3.41    0.17
  -3   5  -6    3.59    0.17
   3   5   6    3.33    0.18
   4  -5   6    0.99    0.08
   4  -5   6    1.20    0.10
  -4  -5  -6    0.88    0.09
   4   5   6    1.13    0.12
  -4   5  -6    1.14    0.11
   5  -5   6    2.11    0.14
  -5  -5  -6    2.51    0.14
   5  -5   6    2.29    0.13
  -5   5  -6    2.38    0.15
   5   5   6    2.41    0.15
   6  -5   6    0.18    0.06
   6  -5   6    0.21    0.07
  -6  -5  -6    0.23    0.05
  -6   5  -6    0.11    0.05
   7  -5   6    1.51    0.15
   7  -5   6    1.39    0.12
  -7   5  -6    1.49    0.14
   8  -5   6    0.64    0.16
  -8   5  -6    0.71    0.10
  -6  -6   6    0.04    0.05
   6  -6  -6    0.09    0.06
   6  -6  -6    0.04    0.06
  -6   6   6    0.14    0.06
   5  -6  -6    1.19    0.13
  -5  -6   6    1.06    0.13
  -5  -6   6    1.12    0.15
   5  -6  -6    1.36    0.16
   5   6  -6    1.30    0.14
  -5   6   6    1.39    0.14
  -4  -6   6    1.68    0.18
  -4  -6   6    1.63    0.14
   4  -6  -6    1.56    0.13
   4  -6  -6    1.35    0.16
  -4   6   6    1.73    0.13
   4   6  -6    1.42    0.15
  -3  -6   6    9.42    0.38
   3  -6  -6    9.52    0.38
   3  -6  -6    9.12    0.33
  -3  -6   6    9.63    0.35
  -3  -6   6    9.63    0.35
  -3   6   6    8.92    0.33
   3   6  -6    8.81    0.35
  -3   6   6    9.25    0.34
  -2  -6   6    3.95    0.21
   2  -6  -6    4.18    0.23
   2  -6  -6    3.95    0.19
  -2  -6   6    4.10    0.23
  -2  -6   6    3.72    0.20
   2   6  -6    3.88    0.21
  -2   6   6    4.29    0.21
  -2   6   6    3.93    0.19
  -1  -6   6    1.52    0.14
   1  -6  -6    1.68    0.12
   1  -6  -6    1.34    0.16
  -1  -6   6    1.48    0.13
  -1  -6   6    1.31    0.13
  -1   6   6    1.65    0.13
   1   6  -6    1.52    0.13
  -1   6   6    1.66    0.12
   0  -6   6    2.20    0.15
   0  -6   6    2.13    0.15
   0  -6  -6    2.24    0.14
   0  -6   6    1.99    0.14
   0  -6  -6    2.30    0.13
   0  -6  -6    2.28    0.14
   0  -6  -6    2.02    0.16
   0   6  -6    2.18    0.15
   0   6   6    2.24    0.15
   1  -6   6    2.36    0.15
  -1  -6  -6    2.31    0.13
  -1  -6  -6    2.09    0.14
   1  -6   6    2.53    0.16
  -1  -6  -6    2.26    0.18
   1  -6   6    2.20    0.15
  -1  -6  -6    2.30    0.14
   1   6   6    2.51    0.16
  -1   6  -6    2.30    0.16
  -2  -6  -6    0.57    0.09
  -2  -6  -6    0.64    0.11
  -2  -6  -6    0.70    0.09
  -2   6  -6    0.59    0.09
   2   6   6    0.68    0.10
  -2   6  -6    0.77    0.10
   3  -6   6    0.01    0.04
  -3  -6  -6    0.09    0.04
  -3  -6  -6    0.08    0.04
  -3   6  -6    0.07    0.04
   3   6   6    0.00    0.05
  -3   6  -6    0.07    0.05
  -4  -6  -6    0.05    0.04
   4  -6   6    0.00    0.04
   4  -6   6    0.06    0.04
  -4   6  -6    0.12    0.05
   4   6   6    0.08    0.06
   5  -6   6    0.06    0.05
  -5  -6  -6   -0.03    0.03
   5  -6   6    0.04    0.04
  -5   6  -6    0.07    0.05
   5   6   6    0.01    0.05
   6  -6   6    1.65    0.13
   6  -6   6    1.29    0.14
  -6   6  -6    1.56    0.13
   4  -7  -6    1.76    0.14
   4  -7  -6    1.50    0.18
  -4  -7   6    1.54    0.18
  -4  -7   6    1.49    0.15
  -4   7   6    1.70    0.14
   4   7  -6    1.34    0.16
  -3  -7   6    0.13    0.07
   3  -7  -6    0.10    0.05
   3  -7  -6    0.20    0.08
  -3  -7   6    0.05    0.06
  -3  -7   6    0.12    0.06
  -3   7   6    0.17    0.05
   3   7  -6    0.15    0.07
  -3   7   6    0.02    0.05
   2  -7  -6    0.13    0.05
   2  -7  -6    0.13    0.07
  -2  -7   6    0.26    0.08
  -2  -7   6    0.10    0.06
  -2  -7   6    0.08    0.06
   2   7  -6    0.04    0.06
  -2   7   6    0.17    0.06
  -2   7   6    0.04    0.05
  -1  -7   6    1.07    0.13
   1  -7  -6    1.04    0.12
   1  -7  -6    1.15    0.12
   1  -7  -6    1.14    0.13
  -1  -7   6    1.11    0.14
   1  -7  -6    1.22    0.15
  -1  -7   6    1.41    0.15
  -1   7   6    0.99    0.13
   1   7  -6    0.93    0.13
   0  -7  -6    0.01    0.04
   0  -7   6   -0.03    0.05
   0  -7   6    0.00    0.05
   0  -7   6    0.00    0.05
   0  -7  -6   -0.09    0.04
   0  -7  -6   -0.03    0.03
   0   7  -6   -0.02    0.05
   0   7   6   -0.01    0.05
  -1  -7  -6    1.57    0.13
   1  -7   6    1.44    0.15
  -1  -7  -6    1.41    0.14
   1  -7   6    1.22    0.14
  -1  -7  -6    1.21    0.16
   1  -7   6    1.62    0.16
  -1   7  -6    1.56    0.14
   1   7   6    1.40    0.16
  -2  -7  -6    0.51    0.13
   2  -7   6    0.75    0.11
   2  -7   6    0.62    0.11
  -2  -7  -6    0.69    0.10
  -2  -7  -6    0.75    0.11
   2  -7   6    0.80    0.12
  -2   7  -6    0.83    0.11
   2   7   6    0.90    0.12
  -3  -7  -6    0.69    0.10
  -3  -7  -6    0.56    0.09
  -3   7  -6    0.47    0.09
  -3   7  -6    0.77    0.11
   3   7   6    0.61    0.10
  -4  -7  -6    2.44    0.15
   4  -7   6    1.88    0.14
  -4   7  -6    1.84    0.15
   4   7   6    2.18    0.17
 -10   0   7    0.04    0.04
  10   0  -7    0.02    0.04
  -9   0   7    0.08    0.05
   9   0  -7   -0.03    0.04
  -8   0   7    0.01    0.04
   8   0  -7    0.06    0.05
   7   0  -7    0.04    0.04
  -7   0   7   -0.03    0.03
   7   0  -7    0.03    0.03
   6   0  -7   -0.03    0.03
   6   0  -7    0.01    0.02
   6   0  -7   -0.01    0.04
  -6   0   7    0.02    0.03
   5   0  -7   -0.01    0.03
   5   0  -7   -0.03    0.02
  -5   0   7   -0.02    0.02
   5   0  -7    0.01    0.02
  -4   0   7   -0.01    0.01
  -4   0   7   -0.01    0.03
   4   0  -7   -0.01    0.03
  -4   0   7    0.00    0.02
   4   0  -7    0.00    0.02
   4   0  -7    0.02    0.02
   3   0  -7    0.00    0.02
  -3   0   7    0.02    0.02
   3   0  -7   -0.01    0.01
  -3   0   7    0.00    0.02
   3   0  -7   -0.02    0.02
  -3   0   7   -0.01    0.02
  -2   0   7   -0.01    0.01
   2   0  -7    0.01    0.02
  -2   0   7    0.03    0.02
   2   0  -7   -0.02    0.01
   2   0  -7   -0.01    0.01
  -2   0   7   -0.04    0.02
   1   0  -7   -0.29    0.01
  -1   0   7   -0.29    0.01
  -1   0   7   -0.30    0.02
  -1   0   7   -0.32    0.02
   1   0  -7   -0.30    0.01
   0   0   7    0.00    0.02
   0   0  -7   -0.02    0.01
   0   0   7    0.05    0.02
  -1   0  -7   -0.01    0.01
   1   0   7    0.00    0.02
  -1   0  -7    0.01    0.01
   1   0   7    0.00    0.01
  -2   0  -7   -0.05    0.01
   2   0   7   -0.07    0.02
  -2   0  -7   -0.06    0.02
   2   0   7   -0.07    0.01
  -2   0  -7   -0.07    0.01
   3   0   7   -0.07    0.01
   3   0   7   -0.03    0.02
  -3   0  -7   -0.04    0.01
  -3   0  -7   -0.04    0.02
   3   0   7   -0.04    0.02
  -4   0  -7    0.01    0.02
  -4   0  -7    0.02    0.02
   4   0   7   -0.01    0.02
   4   0   7    0.01    0.03
   4   0   7   -0.02    0.01
  -5   0  -7    0.02    0.03
   5   0   7    0.01    0.03
   5   0   7    0.01    0.03
  -5   0  -7    0.00    0.02
   6   0   7   -0.02    0.03
  -6   0  -7    0.01    0.03
   6   0   7    0.03    0.04
  -6   0  -7    0.03    0.03
   7   0   7   -0.06    0.03
  -7   0  -7    0.02    0.04
  -7   0  -7    0.07    0.04
   7   0   7    0.04    0.05
   8   0   7   -0.08    0.05
  -8   0  -7    0.03    0.04
   8   0   7   -0.01    0.04
  -8   0  -7    0.02    0.03
   9   0   7    0.05    0.06
   9   0   7   -0.02    0.05
  -9   0  -7    0.00    0.04
  10   0   7    0.03    0.05
 -10   0  -7    0.01    0.05
  10   0   7    0.02    0.05
 -10  -1   7    0.18    0.06
  10  -1  -7    0.28    0.07
 -10   1   7    0.17    0.06
  10   1  -7    0.20    0.07
   9  -1  -7    0.11    0.05
  -9  -1   7    0.03    0.05
  -9   1   7    0.04    0.05
   9   1  -7    0.01    0.04
  -8  -1   7    3.26    0.18
   8  -1  -7    3.62    0.22
   8  -1  -7    3.40    0.16
   8  -1  -7    3.14    0.16
  -8   1   7    3.44    0.18
   8   1  -7    3.06    0.17
   7  -1  -7    0.51    0.07
  -7  -1   7    0.56    0.08
   7  -1  -7    0.63    0.11
   7  -1  -7    0.67    0.08
  -7   1   7    0.63    0.08
   7   1  -7    0.56    0.08
  -6  -1   7    8.03    0.28
   6  -1  -7    8.54    0.32
   6  -1  -7    8.23    0.27
   6  -1  -7    8.53    0.27
   6   1  -7    8.21    0.28
  -6   1   7    8.50    0.28
  -5  -1   7    2.59    0.11
   5  -1  -7    2.43    0.15
  -5  -1   7    2.73    0.16
  -5  -1   7    2.38    0.12
   5  -1  -7    2.69    0.12
   5  -1  -7    2.35    0.11
   5   1  -7    2.43    0.12
  -5   1   7    2.76    0.13
   4  -1  -7   -0.01    0.02
  -4  -1   7    0.01    0.03
  -4  -1   7    0.01    0.02
   4  -1  -7    0.01    0.02
   4  -1  -7    0.05    0.04
   4   1  -7    0.01    0.01
  -4   1   7    0.02    0.02
   4   1  -7    0.07    0.03
   4   1  -7    0.03    0.02
  -4   1   7    0.05    0.03
   4   1  -7    0.01    0.02
   3  -1  -7   13.49    0.36
   3  -1  -7   13.94    0.35
  -3  -1   7   13.39    0.40
  -3  -1   7   12.99    0.36
   3   1  -7   13.85    0.33
   3   1  -7   13.09    0.36
  -3   1   7   13.35    0.36
   3   1  -7   13.76    0.39
   3   1  -7   13.02    0.37
  -3   1   7   14.08    0.39
  -3   1   7   13.28    0.35
   2  -1  -7   15.11    0.42
   2  -1  -7   15.05    0.39
   2  -1  -7   15.44    0.38
  -2  -1   7   14.59    0.41
  -2  -1   7   15.16    0.39
   2   1  -7   15.27    0.39
   2   1  -7   14.68    0.39
  -2   1   7   14.53    0.38
  -2   1   7   14.64    0.39
   1  -1  -7  244.36    5.82
  -1  -1   7  237.17    5.57
   1  -1  -7  245.89    5.59
   1  -1  -7  236.62    5.72
  -1  -1   7  236.92    5.60
  -1   1   7  235.66    5.75
  -1   1   7  243.37    5.77
   1   1  -7  240.93    5.56
   1   1  -7  231.99    5.57
  -1   1   7  240.68    5.59
   0  -1   7    1.11    0.05
   0  -1   7    1.21    0.05
   0  -1   7    1.29    0.05
   0  -1  -7    1.21    0.06
   0  -1  -7    1.16    0.05
   0   1  -7    1.14    0.06
   0   1   7    1.21    0.06
   0   1   7    1.11    0.07
   0   1  -7    1.20    0.06
   0   1  -7    1.37    0.05
  -1  -1  -7   82.88    1.93
  -1  -1  -7   83.05    1.92
  -1   1  -7   83.96    1.92
  -1   1  -7   83.08    1.94
   1   1   7   82.46    1.94
  -1   1  -7   78.18    1.92
   1   1   7   81.72    1.95
  -1   1  -7   81.06    1.93
   2  -1   7    0.29    0.03
  -2  -1  -7    0.26    0.03
   2  -1   7    0.28    0.02
  -2  -1  -7    0.26    0.02
   2  -1   7    0.22    0.02
   2   1   7    0.25    0.04
  -2   1  -7    0.23    0.03
   2   1   7    0.23    0.03
   2   1   7    0.23    0.04
  -2   1  -7    0.27    0.03
  -2   1  -7    0.23    0.03
  -3  -1  -7   16.29    0.43
   3  -1   7   16.11    0.42
  -3  -1  -7   16.94    0.42
   3  -1   7   16.80    0.42
   3  -1   7   17.73    0.42
   3  -1   7   16.58    0.44
   3   1   7   17.38    0.43
  -3   1  -7   16.81    0.42
  -3   1  -7   15.09    0.43
   3   1   7   16.41    0.46
   3   1   7   16.30    0.44
   4  -1   7    0.03    0.03
   4  -1   7    0.04    0.02
   4  -1   7    0.01    0.02
  -4  -1  -7    0.04    0.03
  -4  -1  -7    0.07    0.02
   4   1   7    0.00    0.02
   4   1   7    0.10    0.04
  -4   1  -7    0.04    0.03
   4   1   7    0.04    0.03
  -4   1  -7    0.05    0.02
  -5  -1  -7    2.13    0.11
   5  -1   7    2.32    0.12
   5  -1   7    2.31    0.12
  -5  -1  -7    2.14    0.10
   5   1   7    2.16    0.12
   5   1   7    2.54    0.14
  -5   1  -7    2.47    0.11
  -5   1  -7    2.14    0.11
  -6  -1  -7   11.84    0.35
   6  -1   7   11.83    0.37
   6  -1   7   11.59    0.36
  -6  -1  -7   11.66    0.34
   6   1   7   11.73    0.40
   6   1   7   11.60    0.36
  -6   1  -7   11.57    0.35
  -6   1  -7   11.49    0.36
  -7  -1  -7    0.18    0.04
  -7  -1  -7    0.20    0.05
   7  -1   7    0.17    0.06
   7  -1   7    0.14    0.05
  -7   1  -7    0.15    0.05
  -7   1  -7    0.26    0.06
   7   1   7    0.22    0.07
   7   1   7    0.18    0.06
   8  -1   7    1.36    0.14
  -8  -1  -7    1.27    0.10
  -8  -1  -7    1.74    0.11
   8  -1   7    1.40    0.13
  -8   1  -7    1.54    0.11
   8   1   7    1.28    0.13
   8   1   7    1.77    0.18
  -8   1  -7    1.41    0.13
   9  -1   7    1.51    0.16
  -9  -1  -7    1.37    0.11
   9  -1   7    1.42    0.14
  -9   1  -7    1.10    0.13
   9   1   7    1.13    0.15
  -9   1  -7    1.24    0.12
   9   1   7    0.98    0.12
  10  -1   7    1.47    0.18
 -10  -1  -7    1.20    0.12
  10  -1   7    1.01    0.12
 -10   1  -7    1.03    0.13
  10   1   7    1.14    0.14
  10  -2  -7    0.08    0.03
 -10  -2   7    0.03    0.04
 -10   2   7    0.01    0.05
  10   2  -7    0.03    0.05
  -9  -2   7    0.08    0.05
   9  -2  -7    0.07    0.05
   9  -2  -7    0.01    0.04
   9   2  -7    0.03    0.04
  -9   2   7    0.06    0.05
   8  -2  -7    0.53    0.11
  -8  -2   7    0.57    0.09
   8  -2  -7    0.29    0.06
   8   2  -7    0.44    0.08
  -8   2   7    0.54    0.09
  -7  -2   7    3.74    0.18
   7  -2  -7    3.88    0.22
   7  -2  -7    3.90    0.18
  -7   2   7    3.33    0.18
   7   2  -7    3.60    0.18
   6  -2  -7    0.72    0.07
   6  -2  -7    0.84    0.09
  -6  -2   7    0.76    0.09
   6  -2  -7    0.83    0.11
  -6   2   7    0.94    0.10
   6   2  -7    0.65    0.08
  -5  -2   7    0.24    0.07
   5  -2  -7    0.23    0.05
   5  -2  -7    0.15    0.05
   5  -2  -7    0.23    0.04
  -5  -2   7    0.21    0.05
  -5   2   7    0.25    0.05
   5   2  -7    0.32    0.05
   5   2  -7    0.16    0.05
   4  -2  -7   12.16    0.37
  -4  -2   7   11.47    0.38
   4  -2  -7   11.82    0.31
  -4  -2   7   10.70    0.34
   4   2  -7   11.77    0.33
   4   2  -7   11.56    0.34
  -4   2   7   11.38    0.32
  -4   2   7   11.12    0.33
   3  -2  -7   19.83    0.48
  -3  -2   7   18.90    0.54
  -3  -2   7   19.11    0.51
   3  -2  -7   18.55    0.53
   3  -2  -7   19.19    0.50
  -3   2   7   18.40    0.49
   3   2  -7   19.90    0.51
   3   2  -7   18.94    0.50
  -3   2   7   18.40    0.50
   2  -2  -7    0.76    0.04
  -2  -2   7    0.78    0.07
   2  -2  -7    0.67    0.06
  -2  -2   7    0.66    0.05
   2  -2  -7    0.90    0.08
   2   2  -7    0.77    0.06
  -2   2   7    0.64    0.06
  -2   2   7    0.78    0.05
   2   2  -7    0.66    0.06
   1  -2  -7   33.38    0.87
  -1  -2   7   35.04    0.84
   1  -2  -7   34.59    0.85
   1  -2  -7   35.45    0.81
  -1  -2   7   33.63    0.85
  -1  -2   7   34.51    0.85
   1   2  -7   34.66    0.84
  -1   2   7   34.46    0.83
  -1   2   7   34.25    0.85
   1   2  -7   34.61    0.86
   0  -2  -7   28.78    0.73
   0  -2   7   29.02    0.72
   0  -2  -7   29.71    0.76
   0  -2   7   30.04    0.73
   0  -2   7   28.52    0.71
   0  -2  -7   31.04    0.70
   0  -2   7   29.30    0.71
   0   2   7   28.63    0.74
   0   2   7   29.51    0.71
   0   2  -7   29.31    0.72
   0   2   7   30.95    0.76
   0   2  -7   28.31    0.74
   0   2  -7   30.38    0.70
  -1  -2  -7  119.63    2.83
  -1  -2  -7  121.93    2.81
  -1  -2  -7  121.52    2.81
  -1  -2  -7  117.18    2.86
  -1   2  -7  116.95    2.83
  -1   2  -7  121.60    2.82
   1   2   7  121.90    2.84
  -1   2  -7  118.74    2.81
   1   2   7  122.07    2.81
   1   2   7  122.89    2.86
  -1   2  -7  120.17    2.82
  -2  -2  -7   26.10    0.64
  -2  -2  -7   26.12    0.63
  -2  -2  -7   25.37    0.65
  -2  -2  -7   26.59    0.69
   2   2   7   24.37    0.66
  -2   2  -7   26.48    0.65
  -2   2  -7   25.18    0.64
   2   2   7   26.32    0.69
  -2   2  -7   26.30    0.65
  -2   2  -7   25.69    0.65
   2   2   7   26.39    0.64
  -3  -2  -7    0.97    0.06
  -3  -2  -7    1.00    0.07
  -3  -2  -7    1.07    0.09
  -3   2  -7    1.07    0.07
  -3   2  -7    1.06    0.06
   3   2   7    1.11    0.07
  -3   2  -7    1.20    0.07
  -3   2  -7    1.13    0.07
   3   2   7    1.03    0.07
   3   2   7    0.80    0.09
   4  -2   7   29.40    0.76
   4  -2   7   29.60    0.78
   4  -2   7   30.50    0.78
  -4  -2  -7   31.31    0.77
  -4  -2  -7   30.89    0.78
  -4   2  -7   30.99    0.78
  -4   2  -7   31.00    0.79
   4   2   7   32.14    0.84
   4   2   7   30.61    0.78
  -4   2  -7   32.59    0.78
   4   2   7   31.91    0.78
   5  -2   7    2.92    0.13
   5  -2   7    3.00    0.13
  -5  -2  -7    3.04    0.13
  -5  -2  -7    3.14    0.13
  -5   2  -7    2.99    0.14
   5   2   7    2.66    0.17
  -5   2  -7    3.22    0.14
   5   2   7    2.98    0.14
  -6  -2  -7    0.18    0.05
   6  -2   7    0.24    0.06
  -6  -2  -7    0.37    0.06
   6  -2   7    0.29    0.05
  -6   2  -7    0.30    0.06
  -6   2  -7    0.29    0.05
   6   2   7    0.27    0.06
   6   2   7    0.21    0.07
   7  -2   7    1.62    0.11
  -7  -2  -7    1.49    0.10
  -7  -2  -7    1.61    0.10
   7  -2   7    1.45    0.12
   7   2   7    1.54    0.12
  -7   2  -7    1.51    0.11
   7   2   7    1.69    0.14
  -7   2  -7    1.63    0.12
   8  -2   7    0.30    0.06
   8  -2   7    0.33    0.08
  -8  -2  -7    0.39    0.07
  -8   2  -7    0.48    0.09
  -8   2  -7    0.49    0.08
   8   2   7    0.40    0.08
   9  -2   7    0.19    0.06
   9  -2   7    0.17    0.07
  -9   2  -7    0.13    0.07
   9   2   7    0.03    0.05
  -9   2  -7    0.09    0.04
  10  -2   7    0.25    0.12
  10  -2   7    0.18    0.06
 -10   2  -7    0.35    0.11
   9  -3  -7    2.20    0.15
  -9  -3   7    2.26    0.16
   9  -3  -7    2.00    0.18
   9   3  -7    2.26    0.16
  -9   3   7    2.18    0.16
  -8  -3   7    1.00    0.12
   8  -3  -7    1.15    0.12
   8  -3  -7    1.25    0.16
  -8   3   7    1.35    0.14
   8   3  -7    1.19    0.12
   7  -3  -7    0.67    0.11
   7  -3  -7    0.55    0.08
  -7  -3   7    0.44    0.08
   7   3  -7    0.43    0.08
  -7   3   7    0.39    0.08
  -6  -3   7    0.55    0.08
   6  -3  -7    0.63    0.10
   6  -3  -7    0.54    0.08
  -6   3   7    0.61    0.08
   6   3  -7    0.45    0.07
  -5  -3   7    0.28    0.08
   5  -3  -7    0.42    0.07
  -5  -3   7    0.32    0.06
   5  -3  -7    0.32    0.08
  -5   3   7    0.38    0.06
   5   3  -7    0.33    0.06
   5   3  -7    0.39    0.06
  -4  -3   7    1.34    0.09
   4  -3  -7    1.24    0.12
  -4  -3   7    1.16    0.12
   4  -3  -7    1.24    0.09
   4   3  -7    1.58    0.10
  -4   3   7    1.27    0.09
  -4   3   7    1.28    0.08
   4   3  -7    1.29    0.09
   3  -3  -7   14.53    0.41
  -3  -3   7   14.43    0.45
   3  -3  -7   14.36    0.44
  -3  -3   7   14.19    0.41
  -3   3   7   15.34    0.41
   3   3  -7   14.31    0.42
   3   3  -7   14.56    0.41
  -3   3   7   14.81    0.41
  -2  -3   7    1.45    0.09
   2  -3  -7    1.25    0.08
  -2  -3   7    1.54    0.09
   2  -3  -7    1.48    0.10
  -2  -3   7    1.49    0.10
   2   3  -7    1.50    0.09
   2   3  -7    1.60    0.08
  -2   3   7    1.32    0.08
  -2   3   7    1.54    0.08
  -1  -3   7    0.39    0.05
   1  -3  -7    0.30    0.04
  -1  -3   7    0.46    0.06
   1  -3  -7    0.30    0.05
  -1  -3   7    0.39    0.05
   1   3  -7    0.43    0.05
  -1   3   7    0.37    0.04
   1   3  -7    0.41    0.06
  -1   3   7    0.37    0.05
   0  -3   7   11.46    0.31
   0  -3   7   11.82    0.31
   0  -3  -7   11.08    0.36
   0  -3  -7   11.61    0.33
   0  -3   7   11.66    0.33
   0  -3   7   11.99    0.30
   0  -3   7   11.68    0.33
   0   3   7   11.44    0.34
   0   3  -7   12.31    0.32
   0   3   7   11.47    0.32
   0   3  -7   12.01    0.35
  -1  -3  -7   21.98    0.62
  -1  -3  -7   22.37    0.57
  -1  -3  -7   22.22    0.57
   1  -3   7   22.63    0.56
   1  -3   7   21.96    0.53
   1  -3   7   22.82    0.53
  -1  -3  -7   22.44    0.58
   1   3   7   22.53    0.54
  -1   3  -7   21.94    0.58
   1   3   7   22.80    0.60
  -1   3  -7   22.13    0.59
  -1   3  -7   22.18    0.56
  -2  -3  -7    9.64    0.33
  -2  -3  -7    9.64    0.28
  -2  -3  -7    9.62    0.28
  -2  -3  -7    9.61    0.28
   2   3   7    9.75    0.30
  -2   3  -7    9.55    0.28
  -2   3  -7    9.71    0.28
   2   3   7    9.59    0.26
  -2   3  -7    9.27    0.27
   2   3   7    9.82    0.33
  -2   3  -7    9.64    0.29
  -3  -3  -7    0.22    0.04
  -3  -3  -7    0.20    0.06
  -3  -3  -7    0.14    0.04
  -3   3  -7    0.20    0.04
   3   3   7    0.23    0.04
  -3   3  -7    0.20    0.04
  -3   3  -7    0.21    0.04
   3   3   7    0.13    0.04
  -3   3  -7    0.23    0.04
  -4  -3  -7    4.58    0.17
   4  -3   7    4.42    0.16
   4  -3   7    4.53    0.14
  -4  -3  -7    4.76    0.17
  -4   3  -7    4.40    0.17
   4   3   7    4.25    0.17
   4   3   7    4.49    0.17
  -4   3  -7    4.61    0.18
   5  -3   7    0.58    0.06
  -5  -3  -7    0.58    0.07
   5  -3   7    0.50    0.06
  -5  -3  -7    0.52    0.06
   5   3   7    0.78    0.08
  -5   3  -7    0.62    0.08
  -5   3  -7    0.57    0.07
   5   3   7    0.62    0.07
  -6  -3  -7   -0.02    0.02
   6  -3   7    0.03    0.04
  -6  -3  -7   -0.02    0.03
   6  -3   7   -0.02    0.03
  -6   3  -7   -0.03    0.03
   6   3   7   -0.04    0.03
  -6   3  -7    0.05    0.04
   7  -3   7    1.03    0.13
  -7  -3  -7    1.11    0.12
  -7  -3  -7    1.04    0.09
   7  -3   7    0.90    0.10
   7   3   7    1.10    0.11
  -7   3  -7    1.00    0.11
  -7   3  -7    1.22    0.10
   8  -3   7    1.96    0.15
  -8   3  -7    2.08    0.13
   8   3   7    1.82    0.14
  -8   3  -7    1.77    0.14
   9  -3   7    0.51    0.10
  -9   3  -7    0.50    0.10
   9   3   7    0.53    0.09
  -9   3  -7    0.43    0.07
   8  -4  -7    0.99    0.12
   8  -4  -7    1.15    0.15
  -8  -4   7    1.04    0.13
  -8   4   7    1.02    0.12
   8   4  -7    1.30    0.14
   7  -4  -7    1.71    0.13
   7  -4  -7    1.47    0.17
  -7  -4   7    1.42    0.14
  -7   4   7    1.48    0.14
   7   4  -7    1.42    0.12
   6  -4  -7   -0.07    0.03
   6  -4  -7    0.10    0.06
  -6  -4   7    0.04    0.04
   6   4  -7   -0.04    0.03
  -6   4   7    0.05    0.04
  -5  -4   7    0.05    0.05
   5  -4  -7    0.14    0.07
  -5  -4   7    0.15    0.06
   5  -4  -7    0.21    0.06
  -5   4   7    0.11    0.05
   5   4  -7    0.14    0.04
   5   4  -7    0.15    0.05
   4  -4  -7   13.81    0.46
  -4  -4   7   14.00    0.47
  -4  -4   7   14.56    0.44
   4  -4  -7   14.06    0.43
  -4   4   7   13.96    0.42
  -4   4   7   15.03    0.42
   4   4  -7   14.11    0.41
   4   4  -7   13.62    0.43
   3  -4  -7    6.32    0.24
  -3  -4   7    6.80    0.25
  -3  -4   7    7.12    0.28
   3  -4  -7    7.24    0.28
  -3  -4   7    6.99    0.25
   3   4  -7    7.12    0.23
   3   4  -7    6.24    0.25
  -3   4   7    6.92    0.24
  -3   4   7    7.04    0.24
  -2  -4   7    1.53    0.10
  -2  -4   7    1.47    0.11
   2  -4  -7    1.28    0.12
  -2  -4   7    1.46    0.10
   2  -4  -7    1.73    0.11
  -2   4   7    1.78    0.11
   2   4  -7    1.44    0.11
   2   4  -7    1.73    0.09
  -2   4   7    1.72    0.10
  -1  -4   7    0.77    0.08
   1  -4  -7    0.59    0.07
  -1  -4   7    0.80    0.08
  -1  -4   7    0.68    0.08
   1  -4  -7    0.66    0.09
   1   4  -7    0.61    0.08
  -1   4   7    0.62    0.07
  -1   4   7    0.70    0.07
   1   4  -7    0.78    0.06
   0  -4  -7    0.75    0.07
   0  -4   7    0.70    0.07
   0  -4   7    0.65    0.07
   0  -4   7    0.75    0.08
   0  -4  -7    0.69    0.09
   0   4  -7    0.77    0.06
   0   4  -7    0.61    0.08
   0   4   7    0.69    0.08
   0   4   7    0.85    0.07
  -1  -4  -7    0.12    0.04
   1  -4   7    0.11    0.03
  -1  -4  -7    0.07    0.03
  -1  -4  -7    0.04    0.04
  -1  -4  -7    0.08    0.03
   1  -4   7    0.05    0.03
  -1   4  -7    0.08    0.02
   1   4   7    0.07    0.04
  -1   4  -7    0.08    0.04
  -1   4  -7    0.08    0.04
  -2  -4  -7    1.21    0.08
  -2  -4  -7    1.18    0.08
  -2  -4  -7    1.07    0.08
   2  -4   7    1.13    0.06
  -2  -4  -7    1.33    0.13
   2  -4   7    1.28    0.08
   2   4   7    1.05    0.09
  -2   4  -7    1.18    0.09
  -2   4  -7    1.13    0.09
   3  -4   7    6.60    0.23
  -3  -4  -7    6.65    0.22
  -3  -4  -7    6.62    0.23
  -3  -4  -7    7.09    0.32
   3  -4   7    6.39    0.19
  -3  -4  -7    6.46    0.23
   3   4   7    6.52    0.25
  -3   4  -7    6.73    0.24
  -3   4  -7    6.87    0.24
  -4  -4  -7    5.46    0.20
   4  -4   7    5.01    0.21
  -4  -4  -7    5.57    0.20
   4  -4   7    5.32    0.17
   4   4   7    5.47    0.22
  -4   4  -7    5.38    0.21
  -5  -4  -7   -0.01    0.03
  -5  -4  -7    0.04    0.03
   5  -4   7    0.01    0.04
   5  -4   7    0.01    0.03
  -5   4  -7    0.04    0.04
   5   4   7    0.07    0.04
   5   4   7    0.03    0.03
   6  -4   7    0.02    0.04
  -6  -4  -7   -0.07    0.02
   6  -4   7   -0.06    0.03
   6   4   7   -0.01    0.03
  -6   4  -7    0.00    0.04
   7  -4   7    1.68    0.13
   7  -4   7    1.70    0.13
  -7   4  -7    1.73    0.12
   7   4   7    1.54    0.12
   8  -4   7    3.00    0.19
   8  -4   7    2.83    0.18
   8   4   7    2.88    0.17
  -8   4  -7    2.84    0.17
   7  -5  -7   -0.08    0.05
  -7  -5   7   -0.08    0.04
   7  -5  -7    0.03    0.05
   7   5  -7    0.02    0.03
  -7   5   7    0.03    0.04
   6  -5  -7    0.59    0.11
   6  -5  -7    0.56    0.09
  -6  -5   7    0.54    0.09
   6   5  -7    0.44    0.07
  -6   5   7    0.77    0.11
   5  -5  -7    3.53    0.21
  -5  -5   7    3.84    0.23
  -5  -5   7    4.00    0.20
   5  -5  -7    3.49    0.19
   5   5  -7    3.76    0.17
  -5   5   7    3.65    0.19
   5   5  -7    3.53    0.19
  -4  -5   7    0.79    0.10
   4  -5  -7    1.04    0.13
  -4  -5   7    1.20    0.15
   4  -5  -7    1.09    0.12
   4   5  -7    1.07    0.09
  -4   5   7    1.09    0.09
   4   5  -7    1.07    0.12
  -4   5   7    1.00    0.11
  -3  -5   7    2.15    0.14
  -3  -5   7    2.24    0.14
   3  -5  -7    2.14    0.14
  -3  -5   7    2.49    0.17
   3  -5  -7    2.24    0.16
  -3   5   7    2.40    0.14
   3   5  -7    2.34    0.15
  -3   5   7    2.08    0.13
   2  -5  -7    7.01    0.25
  -2  -5   7    6.80    0.28
  -2  -5   7    6.51    0.26
   2  -5  -7    6.99    0.29
  -2  -5   7    6.87    0.26
  -2   5   7    6.63    0.26
   2   5  -7    6.81    0.27
  -2   5   7    6.73    0.25
  -1  -5   7    1.71    0.12
   1  -5  -7    1.64    0.11
  -1  -5   7    1.68    0.12
  -1  -5   7    1.59    0.11
   1  -5  -7    1.71    0.14
   1   5  -7    1.57    0.12
  -1   5   7    1.70    0.11
  -1   5   7    1.40    0.11
   0  -5   7    1.00    0.10
   0  -5   7    0.91    0.10
   0  -5  -7    0.99    0.10
   0  -5   7    0.90    0.10
   0  -5  -7    0.91    0.09
   0  -5  -7    1.07    0.10
   0   5  -7    0.95    0.11
   0   5   7    0.91    0.09
   0   5   7    0.97    0.10
   1  -5   7    0.93    0.10
   1  -5   7    1.01    0.10
  -1  -5  -7    1.03    0.13
  -1  -5  -7    0.92    0.09
  -1  -5  -7    0.93    0.09
   1  -5   7    0.93    0.08
  -1  -5  -7    0.91    0.09
   1   5   7    0.96    0.11
  -1   5  -7    0.91    0.10
  -2  -5  -7   14.27    0.49
   2  -5   7   13.83    0.40
  -2  -5  -7   14.12    0.42
  -2  -5  -7   14.30    0.42
  -2  -5  -7   14.46    0.42
  -2   5  -7   14.24    0.43
  -2   5  -7   14.31    0.44
   2   5   7   13.47    0.45
  -3  -5  -7    2.75    0.14
   3  -5   7    2.70    0.14
  -3  -5  -7    2.59    0.14
   3  -5   7    2.79    0.12
  -3  -5  -7    2.98    0.14
   3   5   7    2.93    0.17
  -3   5  -7    2.71    0.15
  -3   5  -7    2.66    0.15
  -4  -5  -7    0.06    0.04
   4  -5   7    0.02    0.03
   4  -5   7    0.05    0.03
   4   5   7   -0.05    0.03
  -4   5  -7    0.01    0.04
  -5  -5  -7    0.49    0.07
   5  -5   7    0.47    0.08
   5  -5   7    0.48    0.07
  -5   5  -7    0.49    0.08
   5   5   7    0.39    0.08
   6  -5   7    0.22    0.06
   6  -5   7    0.37    0.08
  -6   5  -7    0.19    0.06
   7  -5   7    0.52    0.09
   7  -5   7    0.65    0.11
  -7   5  -7    0.49    0.09
   6  -6  -7   -0.04    0.04
   6  -6  -7    0.04    0.06
  -6  -6   7   -0.11    0.04
  -6   6   7    0.06    0.05
   5  -6  -7    0.67    0.12
  -5  -6   7    0.67    0.12
  -5  -6   7    0.50    0.10
   5  -6  -7    0.62    0.10
  -5   6   7    0.57    0.09
   5   6  -7    0.61    0.10
  -4  -6   7    0.08    0.07
  -4  -6   7    0.18    0.06
   4  -6  -7    0.18    0.07
   4  -6  -7    0.07    0.05
  -4   6   7    0.09    0.05
   4   6  -7    0.07    0.06
  -3  -6   7    2.88    0.18
  -3  -6   7    3.18    0.21
  -3  -6   7    3.00    0.18
   3  -6  -7    3.02    0.17
   3  -6  -7    2.99    0.20
  -3   6   7    3.16    0.17
   3   6  -7    3.29    0.20
  -3   6   7    3.31    0.18
  -2  -6   7    0.05    0.05
   2  -6  -7    0.02    0.05
  -2  -6   7   -0.01    0.05
  -2  -6   7    0.08    0.05
   2  -6  -7    0.04    0.04
  -2   6   7    0.07    0.04
   2   6  -7    0.00    0.05
  -2   6   7   -0.03    0.04
  -1  -6   7    0.13    0.06
  -1  -6   7    0.12    0.06
   1  -6  -7    0.07    0.04
  -1  -6   7    0.15    0.06
   1  -6  -7    0.20    0.07
  -1   6   7    0.12    0.05
  -1   6   7    0.10    0.05
   1   6  -7    0.16    0.07
   0  -6  -7    0.41    0.09
   0  -6  -7    0.47    0.07
   0  -6   7    0.40    0.08
   0  -6   7    0.18    0.06
   0  -6   7    0.31    0.07
   0  -6  -7    0.40    0.07
   0  -6  -7    0.44    0.08
   0   6  -7    0.33    0.08
   0   6   7    0.26    0.07
   1  -6   7    3.32    0.19
   1  -6   7    3.35    0.19
  -1  -6  -7    3.59    0.18
  -1  -6  -7    3.44    0.22
   1  -6   7    3.34    0.18
  -1  -6  -7    3.73    0.18
  -1  -6  -7    3.61    0.17
  -1   6  -7    3.75    0.20
   1   6   7    3.21    0.19
  -2  -6  -7    0.36    0.07
  -2  -6  -7    0.55    0.11
  -2  -6  -7    0.55    0.08
   2   6   7    0.27    0.07
  -2   6  -7    0.49    0.08
  -2   6  -7    0.45    0.08
  -3  -6  -7    2.37    0.14
  -3  -6  -7    2.33    0.14
   3  -6   7    2.14    0.13
  -3   6  -7    2.15    0.15
   3   6   7    2.17    0.16
  -3   6  -7    2.03    0.14
  -4  -6  -7    0.13    0.05
   4  -6   7    0.33    0.06
  -4   6  -7    0.32    0.07
   4   6   7    0.31    0.07
   5  -6   7    3.52    0.17
   5  -6   7    3.75    0.19
   5   6   7    3.78    0.21
  -5   6  -7    4.03    0.21
   6  -6   7    0.54    0.10
   6  -6   7    0.51    0.08
  -6   6  -7    0.41    0.08
   4  -7  -7    1.13    0.15
   4  -7  -7    1.34    0.14
  -4  -7   7    1.33    0.15
  -4  -7   7    1.29    0.18
   4   7  -7    1.18    0.15
  -4   7   7    1.22    0.14
  -3  -7   7   -0.02    0.05
  -3  -7   7   -0.06    0.04
   3  -7  -7   -0.05    0.04
   3  -7  -7   -0.02    0.05
  -3  -7   7    0.01    0.06
  -3   7   7   -0.03    0.03
  -3   7   7    0.09    0.05
   3   7  -7    0.00    0.05
  -2  -7   7    1.50    0.15
  -2  -7   7    1.66    0.16
   2  -7  -7    1.58    0.13
  -2  -7   7    1.60    0.17
   2  -7  -7    1.53    0.18
  -2   7   7    1.52    0.13
   2   7  -7    1.55    0.17
  -2   7   7    1.48    0.15
   1  -7  -7    1.59    0.13
   1  -7  -7    1.79    0.13
  -1  -7   7    1.98    0.16
   1  -7  -7    1.65    0.14
  -1  -7   7    1.79    0.16
   1  -7  -7    1.81    0.16
  -1  -7   7    2.09    0.16
   1   7  -7    1.80    0.15
  -1   7   7    1.57    0.14
   0  -7  -7    0.43    0.08
   0  -7   7    0.26    0.08
   0  -7   7    0.46    0.10
   0  -7   7    0.54    0.10
   0  -7  -7    0.52    0.09
   0  -7  -7    0.61    0.11
   0   7   7    0.45    0.09
   0   7  -7    0.55    0.10
  -1  -7  -7   -0.03    0.05
  -1  -7  -7    0.04    0.04
   1  -7   7    0.00    0.05
   1  -7   7   -0.04    0.05
  -1  -7  -7    0.03    0.04
   1  -7   7    0.04    0.05
  -1   7  -7    0.05    0.05
   1   7   7    0.06    0.06
  -2  -7  -7    2.38    0.16
   2  -7   7    2.64    0.17
   2  -7   7    2.24    0.17
  -2  -7  -7    2.68    0.16
   2  -7   7    2.58    0.18
  -2   7  -7    3.05    0.18
   2   7   7    2.69    0.19
   3  -7   7    0.03    0.05
  -3  -7  -7    0.08    0.04
  -3  -7  -7    0.05    0.03
   3  -7   7    0.19    0.07
   3  -7   7    0.05    0.06
  -3   7  -7   -0.05    0.03
   3   7   7    0.05    0.05
  -3   7  -7    0.03    0.04
   4  -7   7    1.82    0.14
   4   7   7    1.75    0.16
  -4   7  -7    1.82    0.14
  10   0  -8    0.82    0.11
 -10   0   8    0.69    0.11
   9   0  -8    3.98    0.21
  -9   0   8    3.95    0.21
   8   0  -8   11.17    0.37
  -8   0   8   10.66    0.37
  -7   0   8    0.30    0.07
   7   0  -8    0.36    0.07
   6   0  -8    1.49    0.15
   6   0  -8    1.08    0.07
   6   0  -8    1.15    0.09
  -6   0   8    1.20    0.09
   5   0  -8   58.12    1.45
   5   0  -8   58.05    1.38
   5   0  -8   55.66    1.40
  -5   0   8   56.51    1.40
   4   0  -8    5.42    0.17
  -4   0   8    5.29    0.17
   4   0  -8    5.43    0.21
   4   0  -8    5.17    0.18
  -4   0   8    5.41    0.18
   3   0  -8   36.94    0.88
  -3   0   8   35.89    0.89
   3   0  -8   36.90    0.93
   3   0  -8   35.69    0.89
  -3   0   8   36.56    0.89
   2   0  -8   30.58    0.76
  -2   0   8   30.64    0.73
  -2   0   8   28.68    0.74
   2   0  -8   29.93    0.74
   2   0  -8   30.37    0.72
  -1   0   8  195.41    4.39
  -1   0   8  191.28    4.41
   1   0  -8  187.48    4.39
   1   0  -8  182.51    4.40
  -1   0   8  188.53    4.42
   0   0   8  676.45   16.41
   0   0   8  686.17   16.28
   0   0  -8  682.75   16.26
   0   0  -8  649.86   16.11
   1   0   8   21.91    0.54
   1   0   8   20.59    0.54
  -1   0  -8   22.53    0.54
  -1   0  -8   21.64    0.54
  -2   0  -8    1.07    0.06
   2   0   8    0.86    0.06
   2   0   8    0.90    0.06
   3   0   8    3.56    0.12
  -3   0  -8    3.55    0.11
   3   0   8    3.33    0.13
   4   0   8    0.25    0.04
  -4   0  -8    0.41    0.05
  -4   0  -8    0.39    0.04
   4   0   8    0.37    0.06
   4   0   8    0.35    0.04
  -5   0  -8    0.55    0.05
   5   0   8    0.54    0.07
  -5   0  -8    0.56    0.06
   5   0   8    0.43    0.06
  -6   0  -8    0.53    0.06
  -6   0  -8    0.41    0.06
   6   0   8    0.50    0.08
   6   0   8    0.39    0.06
  -7   0  -8   32.00    0.84
   7   0   8   31.73    0.88
   7   0   8   30.72    0.84
  -7   0  -8   31.60    0.82
  -8   0  -8    3.20    0.16
   8   0   8    3.05    0.19
   8   0   8    2.85    0.17
   9   0   8    3.64    0.20
  -9   0  -8    3.68    0.19
   9   0   8    3.82    0.23
  10   0   8    0.53    0.11
  10   0   8    0.43    0.10
 -10   0  -8    0.59    0.09
  10  -1  -8    0.89    0.11
 -10  -1   8    0.63    0.10
 -10   1   8    0.65    0.11
  10   1  -8    0.66    0.11
  -9  -1   8    0.96    0.12
   9  -1  -8    1.02    0.11
  -9   1   8    1.26    0.14
   9   1  -8    1.05    0.12
  -8  -1   8    7.16    0.29
   8  -1  -8    7.40    0.27
   8  -1  -8    7.52    0.28
  -8   1   8    7.12    0.29
   8   1  -8    7.45    0.29
   7  -1  -8    6.16    0.23
   7  -1  -8    6.51    0.29
   7  -1  -8    6.49    0.24
  -7  -1   8    5.86    0.24
   7   1  -8    6.24    0.25
  -7   1   8    5.92    0.24
   6  -1  -8    0.48    0.06
  -6  -1   8    0.45    0.07
   6  -1  -8    0.46    0.09
   6  -1  -8    0.49    0.06
  -6   1   8    0.49    0.07
   6   1  -8    0.49    0.07
   5  -1  -8    0.75    0.10
  -5  -1   8    0.67    0.07
   5  -1  -8    0.77    0.07
  -5  -1   8    0.85    0.11
   5  -1  -8    0.59    0.06
  -5  -1   8    0.76    0.06
   5   1  -8    0.65    0.07
  -5   1   8    0.60    0.07
   4  -1  -8    6.57    0.21
   4  -1  -8    6.86    0.21
  -4  -1   8    7.07    0.23
   4  -1  -8    7.25    0.26
  -4  -1   8    6.74    0.21
  -4  -1   8    6.66    0.26
  -4   1   8    6.78    0.22
  -4   1   8    7.01    0.21
   4   1  -8    7.27    0.19
   4   1  -8    7.57    0.26
   4   1  -8    6.58    0.22
   3  -1  -8    5.08    0.20
   3  -1  -8    4.91    0.16
  -3  -1   8    5.17    0.20
  -3  -1   8    5.14    0.17
   3  -1  -8    5.09    0.16
   3   1  -8    5.65    0.26
   3   1  -8    5.33    0.14
  -3   1   8    5.13    0.19
   3   1  -8    5.06    0.17
   3   1  -8    4.75    0.17
  -3   1   8    5.25    0.17
  -3   1   8    5.06    0.17
  -2  -1   8    7.71    0.25
   2  -1  -8    8.13    0.25
   2  -1  -8    7.87    0.22
   2  -1  -8    8.04    0.22
  -2  -1   8    7.89    0.22
   2   1  -8    7.82    0.23
  -2   1   8    7.33    0.23
   2   1  -8    7.80    0.23
  -2   1   8    7.70    0.22
  -1  -1   8    3.72    0.12
   1  -1  -8    3.52    0.11
   1  -1  -8    3.36    0.12
  -1  -1   8    3.41    0.13
   1   1  -8    3.56    0.13
  -1   1   8    3.50    0.11
   1   1  -8    3.58    0.12
  -1   1   8    3.78    0.14
   0  -1   8   21.83    0.52
   0  -1  -8   21.57    0.53
   0  -1   8   20.90    0.53
   0  -1  -8   21.26    0.54
   0  -1   8   21.53    0.52
   0   1  -8   22.05    0.55
   0   1  -8   21.43    0.52
   0   1  -8   21.74    0.54
   0   1   8   21.62    0.55
   0   1   8   21.27    0.56
   1  -1   8    9.53    0.23
  -1  -1  -8    8.97    0.25
  -1  -1  -8    9.25    0.25
   1  -1   8    9.05    0.23
  -1   1  -8    8.80    0.25
  -1   1  -8    9.39    0.24
   1   1   8    8.63    0.26
  -1   1  -8    9.31    0.24
  -1   1  -8    9.57    0.26
   1   1   8    9.12    0.27
   2  -1   8  111.79    2.63
   2  -1   8  116.77    2.60
  -2  -1  -8  109.95    2.63
   2  -1   8  109.76    2.60
  -2  -1  -8  113.13    2.60
  -2   1  -8  109.89    2.63
  -2   1  -8  115.01    2.61
   2   1   8  110.53    2.63
  -2   1  -8  112.64    2.63
   2   1   8  110.52    2.65
   2   1   8  110.36    2.63
   3  -1   8   13.26    0.35
  -3  -1  -8   13.26    0.36
   3  -1   8   14.13    0.35
  -3  -1  -8   13.95    0.34
   3  -1   8   13.38    0.35
  -3   1  -8   13.16    0.36
   3   1   8   13.01    0.39
   3   1   8   13.51    0.36
   3   1   8   13.04    0.36
  -3   1  -8   13.17    0.36
  -3   1  -8   13.84    0.35
   4  -1   8    0.18    0.04
   4  -1   8    0.25    0.03
  -4  -1  -8    0.15    0.03
  -4  -1  -8    0.22    0.04
   4  -1   8    0.18    0.04
   4   1   8    0.23    0.04
   4   1   8    0.17    0.03
   4   1   8    0.19    0.05
  -4   1  -8    0.22    0.03
  -4   1  -8    0.18    0.04
   5  -1   8    0.40    0.06
   5  -1   8    0.36    0.06
  -5  -1  -8    0.41    0.05
  -5  -1  -8    0.41    0.06
   5   1   8    0.39    0.06
  -5   1  -8    0.45    0.06
  -5   1  -8    0.34    0.05
   5   1   8    0.48    0.08
   6  -1   8   15.47    0.47
   6  -1   8   15.37    0.46
  -6  -1  -8   16.32    0.44
  -6  -1  -8   15.44    0.45
   6   1   8   15.87    0.46
   6   1   8   16.22    0.51
  -6   1  -8   15.89    0.46
  -6   1  -8   16.51    0.45
  -7  -1  -8    0.58    0.07
  -7  -1  -8    0.57    0.08
   7  -1   8    0.52    0.09
   7  -1   8    0.41    0.07
  -7   1  -8    0.40    0.07
   7   1   8    0.51    0.10
  -7   1  -8    0.63    0.07
   7   1   8    0.54    0.08
  -8  -1  -8    1.67    0.12
   8  -1   8    1.29    0.13
   8  -1   8    1.65    0.14
   8   1   8    1.90    0.19
  -8   1  -8    1.82    0.11
  -8   1  -8    1.68    0.13
   8   1   8    1.62    0.13
   9  -1   8    0.57    0.11
   9  -1   8    0.43    0.09
  -9  -1  -8    0.74    0.10
   9   1   8    0.56    0.11
   9   1   8    0.67    0.10
  -9   1  -8    0.53    0.09
  10  -1   8    1.67    0.19
  10  -1   8    2.11    0.16
 -10  -1  -8    2.08    0.14
 -10   1  -8    1.85    0.15
  10   1   8    1.75    0.15
   9  -2  -8    2.14    0.14
  -9  -2   8    2.23    0.16
   9  -2  -8    1.97    0.29
  -9   2   8    1.76    0.14
   9   2  -8    1.80    0.14
  -8  -2   8    0.45    0.08
   8  -2  -8    0.53    0.08
   8  -2  -8    0.60    0.11
   8   2  -8    0.44    0.08
  -8   2   8    0.57    0.09
  -7  -2   8    0.01    0.04
   7  -2  -8    0.07    0.06
   7  -2  -8    0.03    0.04
  -7   2   8    0.04    0.04
   7   2  -8   -0.01    0.04
   6  -2  -8    0.27    0.07
   6  -2  -8    0.30    0.05
  -6  -2   8    0.16    0.05
   6  -2  -8    0.21    0.05
  -6   2   8    0.36    0.07
   6   2  -8    0.21    0.05
   5  -2  -8    0.04    0.05
  -5  -2   8    0.00    0.04
   5  -2  -8    0.05    0.03
   5  -2  -8    0.10    0.04
  -5  -2   8    0.04    0.04
   5   2  -8    0.04    0.03
   5   2  -8    0.01    0.03
  -5   2   8    0.08    0.04
  -4  -2   8    0.41    0.06
  -4  -2   8    0.60    0.09
   4  -2  -8    0.53    0.05
   4  -2  -8    0.54    0.06
   4  -2  -8    0.48    0.08
  -4   2   8    0.45    0.05
  -4   2   8    0.43    0.06
   4   2  -8    0.47    0.06
   4   2  -8    0.45    0.06
  -3  -2   8    0.37    0.05
   3  -2  -8    0.37    0.05
   3  -2  -8    0.43    0.04
  -3  -2   8    0.47    0.07
   3  -2  -8    0.32    0.06
   3   2  -8    0.33    0.05
   3   2  -8    0.38    0.05
  -3   2   8    0.41    0.05
  -3   2   8    0.38    0.05
   2  -2  -8    0.33    0.06
  -2  -2   8    0.25    0.05
   2  -2  -8    0.33    0.03
  -2  -2   8    0.36    0.04
   2  -2  -8    0.27    0.04
  -2   2   8    0.30    0.04
   2   2  -8    0.27    0.04
  -2   2   8    0.26    0.04
   2   2  -8    0.32    0.05
  -1  -2   8   34.27    0.84
   1  -2  -8   36.08    0.80
  -1  -2   8   34.54    0.83
   1  -2  -8   33.49    0.83
  -1  -2   8   34.18    0.83
   1  -2  -8   33.86    0.87
   1   2  -8   32.96    0.84
  -1   2   8   29.52    0.84
  -1   2   8   34.87    0.86
  -1   2   8   33.74    0.82
   1   2  -8   34.43    0.83
   0  -2   8   10.07    0.26
   0  -2   8    9.92    0.28
   0  -2  -8    9.78    0.28
   0  -2   8   10.40    0.27
   0  -2   8   10.23    0.28
   0  -2  -8   10.27    0.31
   0  -2  -8   10.54    0.26
   0   2   8   10.17    0.27
   0   2  -8   10.13    0.29
   0   2  -8    9.92    0.28
   0   2   8    9.77    0.29
   0   2   8   10.44    0.31
   0   2  -8   10.47    0.26
  -1  -2  -8    0.05    0.03
  -1  -2  -8    0.03    0.02
  -1  -2  -8    0.04    0.02
  -1  -2  -8    0.04    0.02
   1   2   8    0.03    0.02
   1   2   8    0.07    0.04
  -1   2  -8    0.02    0.02
  -1   2  -8    0.04    0.02
  -1   2  -8    0.04    0.02
  -1   2  -8    0.03    0.02
   1   2   8    0.04    0.03
  -2  -2  -8    7.11    0.20
  -2  -2  -8    6.62    0.21
  -2  -2  -8    7.03    0.20
  -2  -2  -8    7.36    0.25
  -2   2  -8    6.85    0.21
  -2   2  -8    7.03    0.21
   2   2   8    6.84    0.20
   2   2   8    6.95    0.22
  -2   2  -8    6.79    0.21
  -2   2  -8    7.55    0.22
   2   2   8    6.97    0.24
  -3  -2  -8   10.12    0.30
  -3  -2  -8   10.38    0.28
   3   2   8   10.40    0.29
  -3   2  -8   10.42    0.29
  -3   2  -8   10.21    0.29
   3   2   8   10.64    0.30
  -3   2  -8    9.86    0.29
  -3   2  -8   10.17    0.29
   3   2   8    9.88    0.33
   4  -2   8    1.85    0.10
  -4  -2  -8    1.89    0.09
  -4  -2  -8    1.90    0.10
   4  -2   8    1.74    0.08
  -4   2  -8    1.88    0.09
   4   2   8    1.89    0.10
  -4   2  -8    1.87    0.09
   4   2   8    1.82    0.10
   4   2   8    2.02    0.13
  -4   2  -8    1.85    0.10
   5  -2   8   12.57    0.38
   5  -2   8   13.68    0.40
  -5  -2  -8   14.21    0.38
  -5  -2  -8   13.52    0.39
   5   2   8   14.03    0.40
   5   2   8   13.44    0.45
  -5   2  -8   13.95    0.40
  -5   2  -8   14.44    0.40
  -6  -2  -8    0.86    0.09
   6  -2   8    0.80    0.09
  -6  -2  -8    0.76    0.07
   6  -2   8    0.65    0.08
  -6   2  -8    0.77    0.08
  -6   2  -8    0.71    0.09
   6   2   8    0.73    0.09
   6   2   8    0.68    0.11
   7  -2   8    0.02    0.04
  -7  -2  -8    0.02    0.04
   7  -2   8    0.02    0.04
  -7   2  -8   -0.02    0.03
   7   2   8    0.10    0.05
  -7   2  -8   -0.01    0.04
   7   2   8    0.04    0.04
   8  -2   8    0.02    0.05
   8  -2   8    0.04    0.04
  -8  -2  -8    0.10    0.05
  -8   2  -8    0.02    0.03
  -8   2  -8    0.12    0.06
   8   2   8    0.03    0.05
   9  -2   8    2.76    0.17
   9  -2   8    3.01    0.20
  -9  -2  -8    2.61    0.17
   9   2   8    2.67    0.17
  -9   2  -8    2.57    0.17
  -9  -3   8   -0.02    0.04
   9  -3  -8    0.08    0.04
   9  -3  -8   -0.02    0.04
   9   3  -8    0.01    0.04
  -9   3   8    0.04    0.05
   8  -3  -8    0.49    0.11
  -8  -3   8    0.38    0.08
   8  -3  -8    0.46    0.08
  -8   3   8    0.55    0.09
   8   3  -8    0.45    0.08
   7  -3  -8    0.02    0.05
   7  -3  -8    0.02    0.04
  -7  -3   8    0.01    0.04
   7   3  -8    0.06    0.04
  -7   3   8   -0.01    0.04
   6  -3  -8   -0.01    0.03
  -6  -3   8    0.04    0.04
   6  -3  -8    0.06    0.05
   6   3  -8    0.05    0.04
  -6   3   8    0.04    0.04
  -5  -3   8    5.40    0.22
   5  -3  -8    4.98    0.21
   5  -3  -8    5.56    0.25
  -5  -3   8    5.57    0.26
   5   3  -8    4.95    0.20
  -5   3   8    5.33    0.21
   5   3  -8    5.29    0.20
   4  -3  -8    0.49    0.08
  -4  -3   8    0.45    0.07
   4  -3  -8    0.41    0.06
  -4  -3   8    0.56    0.09
  -4   3   8    0.72    0.08
   4   3  -8    0.45    0.06
  -4   3   8    0.64    0.06
   4   3  -8    0.61    0.07
  -3  -3   8    1.05    0.08
   3  -3  -8    1.15    0.11
   3  -3  -8    1.04    0.08
  -3  -3   8    1.14    0.10
  -3   3   8    1.02    0.08
   3   3  -8    1.08    0.08
  -3   3   8    0.94    0.07
   3   3  -8    1.04    0.08
  -2  -3   8   27.58    0.72
  -2  -3   8   28.56    0.74
  -2  -3   8   27.63    0.72
   2  -3  -8   28.23    0.76
  -2   3   8   28.20    0.71
   2   3  -8   28.47    0.71
   2   3  -8   28.96    0.73
  -2   3   8   26.20    0.72
   1  -3  -8    0.66    0.08
  -1  -3   8    0.49    0.06
  -1  -3   8    0.58    0.06
  -1  -3   8    0.53    0.06
   1  -3  -8    0.65    0.07
  -1   3   8    0.66    0.07
  -1   3   8    0.58    0.06
   1   3  -8    0.57    0.06
   1   3  -8    0.67    0.07
   0  -3   8    0.89    0.06
   0  -3  -8    0.97    0.07
   0  -3   8    0.90    0.06
   0  -3   8    0.92    0.07
   0  -3   8    0.98    0.05
   0  -3  -8    0.88    0.09
   0  -3   8    0.98    0.06
   0   3  -8    0.92    0.06
   0   3   8    0.92    0.08
   0   3  -8    0.80    0.07
   0   3   8    0.88    0.06
  -1  -3  -8    5.72    0.18
  -1  -3  -8    5.71    0.18
  -1  -3  -8    5.69    0.22
  -1  -3  -8    5.68    0.19
  -1   3  -8    5.75    0.18
   1   3   8    5.99    0.16
  -1   3  -8    5.67    0.19
  -1   3  -8    5.74    0.20
  -1   3  -8    5.77    0.17
   1   3   8    5.94    0.21
  -2  -3  -8   19.96    0.58
  -2  -3  -8   19.94    0.52
  -2  -3  -8   19.71    0.53
  -2  -3  -8   20.28    0.52
   2   3   8   20.61    0.58
  -2   3  -8   19.73    0.53
   2   3   8   19.76    0.51
  -2   3  -8   19.34    0.53
  -2   3  -8   20.19    0.52
   2   3   8   19.94    0.54
  -2   3  -8   20.42    0.52
  -3  -3  -8    7.33    0.23
  -3  -3  -8    7.03    0.22
  -3   3  -8    7.29    0.23
  -3   3  -8    7.19    0.23
  -3   3  -8    7.20    0.22
   3   3   8    6.78    0.33
   3   3   8    7.24    0.24
   3   3   8    6.97    0.22
  -3   3  -8    6.88    0.24
  -4  -3  -8    0.15    0.04
  -4  -3  -8    0.05    0.03
   4  -3   8    0.09    0.03
   4  -3   8    0.08    0.02
   4   3   8    0.13    0.04
  -4   3  -8    0.12    0.04
   4   3   8    0.13    0.04
  -4   3  -8    0.12    0.04
  -5  -3  -8    7.27    0.25
  -5  -3  -8    7.42    0.24
   5  -3   8    7.07    0.23
   5  -3   8    7.37    0.24
   5   3   8    7.47    0.25
  -5   3  -8    7.77    0.26
  -5   3  -8    7.05    0.26
   5   3   8    7.39    0.25
   6  -3   8    1.40    0.10
  -6  -3  -8    1.42    0.10
  -6  -3  -8    1.45    0.12
   6  -3   8    1.31    0.09
  -6   3  -8    1.45    0.11
   6   3   8    1.37    0.11
  -6   3  -8    1.43    0.10
   7  -3   8    0.22    0.06
   7  -3   8    0.32    0.06
  -7  -3  -8    0.24    0.06
  -7   3  -8    0.31    0.07
   7   3   8    0.25    0.07
  -7   3  -8    0.26    0.06
   8  -3   8    0.29    0.08
  -8   3  -8    0.26    0.06
  -8   3  -8    0.45    0.09
   8   3   8    0.25    0.07
   9  -3   8    0.11    0.07
   9   3   8    0.11    0.06
  -9   3  -8    0.11    0.06
  -9   3  -8    0.00    0.03
  -8  -4   8    1.65    0.16
   8  -4  -8    1.66    0.16
   8  -4  -8    1.83    0.20
   8   4  -8    1.38    0.14
  -8   4   8    1.45    0.15
  -7  -4   8    0.10    0.05
   7  -4  -8    0.03    0.05
   7  -4  -8    0.03    0.05
   7   4  -8    0.02    0.04
  -7   4   8    0.06    0.05
   6  -4  -8    0.11    0.07
   6  -4  -8    0.10    0.05
  -6  -4   8    0.17    0.06
   6   4  -8    0.10    0.04
  -6   4   8    0.05    0.05
   5  -4  -8    0.69    0.09
  -5  -4   8    0.54    0.10
   5  -4  -8    0.61    0.10
  -5  -4   8    0.61    0.09
  -5   4   8    0.68    0.09
   5   4  -8    0.65    0.08
   5   4  -8    0.68    0.09
   4  -4  -8    0.65    0.10
  -4  -4   8    0.56    0.09
  -4  -4   8    0.67    0.09
   4  -4  -8    0.53    0.08
  -4   4   8    0.70    0.08
   4   4  -8    0.62    0.08
   4   4  -8    0.68    0.08
  -4   4   8    0.46    0.07
   3  -4  -8    1.79    0.12
  -3  -4   8    1.77    0.12
  -3  -4   8    1.91    0.14
   3  -4  -8    1.77    0.14
   3   4  -8    1.69    0.12
  -3   4   8    1.67    0.11
  -3   4   8    1.82    0.11
   3   4  -8    1.79    0.10
  -2  -4   8   13.31    0.41
   2  -4  -8   13.31    0.43
   2  -4  -8   13.07    0.39
  -2  -4   8   13.11    0.39
  -2  -4   8   12.73    0.39
   2   4  -8   13.21    0.37
  -2   4   8   13.81    0.40
  -2   4   8   12.44    0.38
   2   4  -8   13.07    0.41
  -1  -4   8    0.18    0.04
   1  -4  -8    0.20    0.06
  -1  -4   8    0.19    0.05
   1  -4  -8    0.10    0.04
  -1  -4   8    0.18    0.05
  -1   4   8    0.18    0.05
   1   4  -8    0.17    0.04
  -1   4   8    0.16    0.04
   1   4  -8    0.16    0.05
   0  -4   8    2.19    0.11
   0  -4  -8    2.01    0.11
   0  -4  -8    2.37    0.15
   0  -4   8    2.24    0.12
   0  -4   8    2.29    0.12
   0   4   8    2.12    0.12
   0   4  -8    2.29    0.13
   0   4   8    2.38    0.11
   0   4  -8    2.36    0.10
  -1  -4  -8    1.51    0.09
  -1  -4  -8    1.50    0.10
  -1  -4  -8    1.56    0.13
   1  -4   8    1.65    0.08
  -1  -4  -8    1.45    0.09
  -1   4  -8    1.43    0.10
   1   4   8    1.43    0.10
  -1   4  -8    1.62    0.08
  -1   4  -8    1.47    0.10
   2  -4   8    2.93    0.13
  -2  -4  -8    3.02    0.13
  -2  -4  -8    3.04    0.14
  -2  -4  -8    3.11    0.14
  -2  -4  -8    3.34    0.18
   2  -4   8    3.00    0.10
   2   4   8    3.15    0.16
  -2   4  -8    3.26    0.14
  -2   4  -8    3.00    0.15
  -3  -4  -8    1.51    0.09
  -3  -4  -8    1.29    0.09
   3  -4   8    1.31    0.09
   3  -4   8    1.40    0.06
  -3  -4  -8    1.30    0.09
   3   4   8    1.33    0.11
  -3   4  -8    1.47    0.10
  -3   4  -8    1.53    0.10
  -4  -4  -8    0.09    0.04
  -4  -4  -8    0.17    0.04
   4  -4   8    0.17    0.03
   4  -4   8    0.18    0.05
  -4   4  -8    0.18    0.05
  -4   4  -8    0.11    0.04
   4   4   8    0.14    0.05
  -5  -4  -8    0.53    0.07
   5  -4   8    0.46    0.06
  -5  -4  -8    0.54    0.07
  -5   4  -8    0.46    0.07
  -5   4  -8    0.40    0.07
   5   4   8    0.54    0.08
   5   4   8    0.51    0.07
   6  -4   8    0.13    0.05
   6   4   8    0.28    0.06
  -6   4  -8    0.05    0.04
  -6   4  -8    0.16    0.05
   7  -4   8    0.05    0.05
   7  -4   8    0.08    0.05
   7   4   8   -0.01    0.04
  -7   4  -8    0.08    0.06
  -7   4  -8    0.01    0.04
   8  -4   8   -0.01    0.05
   8  -4   8    0.10    0.06
  -8   4  -8    0.06    0.04
   8   4   8    0.02    0.04
   7  -5  -8    0.01    0.04
   7  -5  -8    0.00    0.05
  -7  -5   8    0.00    0.04
  -7   5   8   -0.05    0.04
   7   5  -8    0.02    0.03
   6  -5  -8    0.24    0.07
  -6  -5   8    0.36    0.08
   6  -5  -8    0.35    0.09
   6   5  -8    0.26    0.06
  -6   5   8    0.25    0.07
   5  -5  -8    0.05    0.05
   5  -5  -8   -0.02    0.04
  -5  -5   8    0.01    0.05
  -5  -5   8   -0.06    0.04
   5   5  -8   -0.02    0.03
   5   5  -8    0.02    0.04
  -5   5   8    0.01    0.04
  -4  -5   8    0.91    0.11
   4  -5  -8    0.83    0.11
   4  -5  -8    0.93    0.13
  -4  -5   8    0.96    0.13
  -4   5   8    1.09    0.11
   4   5  -8    0.98    0.11
   4   5  -8    1.04    0.08
  -4   5   8    0.96    0.10
   3  -5  -8    1.86    0.15
  -3  -5   8    1.80    0.13
  -3  -5   8    1.95    0.15
   3  -5  -8    1.80    0.13
  -3  -5   8    2.06    0.14
   3   5  -8    1.90    0.14
  -3   5   8    2.07    0.13
  -3   5   8    1.99    0.13
  -2  -5   8    1.73    0.13
  -2  -5   8    1.91    0.14
   2  -5  -8    2.00    0.15
   2  -5  -8    2.02    0.13
  -2  -5   8    2.19    0.14
  -2   5   8    1.80    0.12
  -2   5   8    1.96    0.13
   2   5  -8    2.05    0.14
  -1  -5   8    1.14    0.11
   1  -5  -8    1.07    0.13
   1  -5  -8    1.17    0.11
  -1  -5   8    0.97    0.10
  -1  -5   8    1.05    0.11
   1   5  -8    1.26    0.11
  -1   5   8    1.14    0.09
  -1   5   8    1.20    0.11
   0  -5  -8    0.60    0.08
   0  -5  -8    0.59    0.08
   0  -5   8    0.60    0.08
   0  -5  -8    0.50    0.07
   0  -5   8    0.45    0.07
   0  -5   8    0.48    0.07
   0   5   8    0.56    0.08
   0   5  -8    0.47    0.08
   1  -5   8    1.80    0.11
  -1  -5  -8    1.79    0.11
  -1  -5  -8    1.92    0.11
   1  -5   8    1.86    0.12
   1  -5   8    1.72    0.12
  -1  -5  -8    1.77    0.11
  -1  -5  -8    1.61    0.16
  -1   5  -8    1.73    0.13
   1   5   8    1.64    0.13
  -2  -5  -8    2.48    0.17
   2  -5   8    2.23    0.11
  -2  -5  -8    2.26    0.13
  -2  -5  -8    2.54    0.13
  -2  -5  -8    2.30    0.13
   2   5   8    2.40    0.15
  -2   5  -8    2.61    0.14
  -2   5  -8    2.28    0.14
   3  -5   8    3.36    0.15
  -3  -5  -8    3.08    0.15
   3  -5   8    3.13    0.13
  -3  -5  -8    3.67    0.16
  -3  -5  -8    3.29    0.15
  -3   5  -8    3.31    0.17
  -3   5  -8    3.15    0.16
   3   5   8    3.17    0.18
   4  -5   8    1.00    0.10
  -4  -5  -8    1.03    0.10
   4  -5   8    0.93    0.07
  -4   5  -8    0.93    0.10
   4   5   8    1.04    0.11
   5  -5   8    0.33    0.06
   5  -5   8    0.45    0.06
   5   5   8    0.41    0.08
  -5   5  -8    0.42    0.08
   6  -5   8    0.10    0.05
   6  -5   8    0.02    0.04
  -6   5  -8    0.00    0.04
   7  -5   8    0.55    0.08
   7  -5   8    0.47    0.09
  -7   5  -8    0.54    0.09
  -6  -6   8   -0.03    0.05
   6  -6  -8    0.06    0.07
   6  -6  -8    0.13    0.06
  -6   6   8    0.15    0.06
  -5  -6   8    0.65    0.12
   5  -6  -8    0.40    0.08
   5  -6  -8    0.56    0.11
  -5  -6   8    0.66    0.11
  -5   6   8    0.62    0.10
   5   6  -8    0.78    0.11
   4  -6  -8    1.44    0.16
  -4  -6   8    1.56    0.18
   4  -6  -8    1.46    0.14
  -4  -6   8    1.79    0.14
   4   6  -8    1.48    0.13
  -4   6   8    1.49    0.14
  -3  -6   8    0.31    0.08
  -3  -6   8    0.24    0.07
   3  -6  -8    0.32    0.07
   3  -6  -8    0.32    0.09
  -3  -6   8    0.53    0.09
  -3   6   8    0.33    0.07
  -3   6   8    0.35    0.07
   3   6  -8    0.39    0.09
   2  -6  -8    6.18    0.26
  -2  -6   8    6.30    0.29
  -2  -6   8    5.92    0.26
   2  -6  -8    6.62    0.31
  -2  -6   8    6.23    0.27
  -2   6   8    7.13    0.28
  -2   6   8    6.08    0.25
   2   6  -8    6.43    0.28
   1  -6  -8    0.31    0.08
  -1  -6   8    0.28    0.07
   1  -6  -8    0.23    0.06
  -1  -6   8    0.23    0.07
  -1  -6   8    0.26    0.07
  -1   6   8    0.29    0.07
   1   6  -8    0.26    0.07
  -1   6   8    0.30    0.06
   0  -6   8    6.08    0.26
   0  -6  -8    6.76    0.30
   0  -6   8    5.80    0.26
   0  -6  -8    6.22    0.25
   0  -6  -8    6.41    0.26
   0  -6  -8    6.15    0.24
   0  -6   8    6.46    0.26
   0   6  -8    6.76    0.28
   0   6   8    6.44    0.28
  -1  -6  -8    0.38    0.07
  -1  -6  -8    0.44    0.07
  -1  -6  -8    0.45    0.10
  -1  -6  -8    0.43    0.07
   1  -6   8    0.30    0.07
   1  -6   8    0.50    0.09
   1  -6   8    0.44    0.09
   1   6   8    0.32    0.08
  -1   6  -8    0.50    0.09
  -2  -6  -8   -0.01    0.03
  -2  -6  -8    0.01    0.03
   2  -6   8    0.02    0.04
   2  -6   8    0.01    0.03
   2  -6   8   -0.04    0.05
   2   6   8    0.02    0.05
  -2   6  -8    0.02    0.04
  -3  -6  -8    0.01    0.03
  -3  -6  -8    0.04    0.03
   3  -6   8   -0.03    0.03
  -3   6  -8   -0.01    0.03
  -3   6  -8    0.04    0.05
   3   6   8    0.02    0.05
   4  -6   8    1.24    0.10
   4   6   8    1.53    0.16
  -4   6  -8    1.48    0.14
   5  -6   8    0.03    0.04
   5  -6   8    0.00    0.04
   5   6   8    0.00    0.04
  -5   6  -8   -0.07    0.03
   6  -6   8    0.71    0.09
   6  -6   8    0.80    0.11
  -6   6  -8    0.52    0.09
   4  -7  -8    0.00    0.05
  -4  -7   8    0.07    0.08
  -4  -7   8    0.01    0.05
   4  -7  -8    0.10    0.05
  -4   7   8    0.03    0.05
   4   7  -8    0.05    0.06
   3  -7  -8    1.12    0.13
  -3  -7   8    1.32    0.15
  -3  -7   8    0.89    0.14
  -3  -7   8    1.05    0.14
   3  -7  -8    1.29    0.17
  -3   7   8    1.31    0.14
   3   7  -8    1.37    0.16
  -3   7   8    1.50    0.12
  -2  -7   8    0.14    0.07
   2  -7  -8    0.10    0.05
  -2  -7   8   -0.01    0.05
  -2  -7   8    0.00    0.05
   2  -7  -8    0.13    0.07
  -2   7   8    0.02    0.04
  -2   7   8    0.13    0.06
   2   7  -8    0.07    0.06
   1  -7  -8    0.05    0.04
  -1  -7   8   -0.02    0.06
   1  -7  -8    0.05    0.05
  -1  -7   8    0.02    0.05
  -1  -7   8   -0.01    0.05
   1  -7  -8    0.04    0.04
   1  -7  -8    0.09    0.06
  -1   7   8    0.04    0.05
   1   7  -8   -0.02    0.05
   0  -7   8    0.25    0.07
   0  -7  -8    0.12    0.05
   0  -7   8    0.34    0.09
   0  -7  -8    0.46    0.10
   0  -7  -8    0.38    0.08
   0  -7   8    0.37    0.09
   0   7   8    0.29    0.08
   0   7  -8    0.36    0.08
  -1  -7  -8    2.71    0.20
  -1  -7  -8    2.18    0.15
  -1  -7  -8    2.66    0.16
   1  -7   8    2.49    0.17
   1  -7   8    2.61    0.18
   1  -7   8    2.92    0.18
   1   7   8    2.85    0.20
  -1   7  -8    2.82    0.18
   2  -7   8    1.05    0.12
  -2  -7  -8    1.25    0.13
   2  -7   8    1.16    0.14
  -2  -7  -8    1.03    0.12
   2  -7   8    1.15    0.14
   2   7   8    1.15    0.14
  -2   7  -8    1.31    0.14
   3  -7   8    0.33    0.09
   3  -7   8    0.34    0.08
   3  -7   8    0.37    0.09
   3   7   8    0.44    0.10
  -3   7  -8    0.21    0.06
   4  -7   8    1.06    0.11
   4   7   8    1.19    0.15
  -4   7  -8    1.02    0.13
  10   0  -9   -0.07    0.03
 -10   0   9    0.02    0.05
  -9   0   9    0.05    0.05
   9   0  -9   -0.01    0.04
  -8   0   9    0.03    0.05
   8   0  -9    0.03    0.04
   7   0  -9   -0.04    0.03
  -7   0   9    0.02    0.04
   6   0  -9    0.00    0.02
   6   0  -9   -0.04    0.03
  -6   0   9    0.03    0.04
   5   0  -9   -0.01    0.04
   5   0  -9   -0.03    0.02
   5   0  -9   -0.01    0.02
  -5   0   9    0.04    0.03
   4   0  -9   -0.06    0.01
  -4   0   9   -0.01    0.03
   4   0  -9   -0.02    0.02
  -4   0   9   -0.05    0.02
   4   0  -9   -0.04    0.03
  -4   0   9   -0.07    0.02
  -3   0   9   -0.06    0.02
   3   0  -9   -0.05    0.02
   3   0  -9    0.01    0.03
  -3   0   9   -0.06    0.02
  -3   0   9   -0.05    0.02
   3   0  -9   -0.07    0.01
   2   0  -9    0.00    0.03
  -2   0   9    0.00    0.02
   2   0  -9    0.00    0.02
  -2   0   9   -0.02    0.01
   2   0  -9    0.01    0.01
  -2   0   9   -0.01    0.03
   1   0  -9   -0.07    0.01
  -1   0   9   -0.06    0.02
  -1   0   9   -0.05    0.02
  -1   0   9   -0.06    0.01
   1   0  -9   -0.07    0.01
  -1   0  -9    0.00    0.02
   1   0   9    0.03    0.02
   1   0   9    0.00    0.02
  -1   0  -9   -0.03    0.02
   2   0   9    0.02    0.02
  -2   0  -9   -0.01    0.02
   2   0   9   -0.01    0.02
  -2   0  -9    0.00    0.02
   3   0   9   -0.04    0.02
   3   0   9   -0.02    0.02
  -3   0  -9    0.01    0.01
   3   0   9    0.00    0.02
  -3   0  -9   -0.03    0.02
   4   0   9    0.01    0.02
   4   0   9    0.01    0.03
  -4   0  -9    0.01    0.01
  -4   0  -9    0.03    0.03
   4   0   9    0.00    0.03
  -5   0  -9   -0.02    0.02
   5   0   9   -0.01    0.04
   5   0   9    0.03    0.03
  -5   0  -9    0.01    0.03
  -6   0  -9   -0.02    0.03
   6   0   9   -0.02    0.04
   6   0   9    0.00    0.03
  -6   0  -9   -0.02    0.02
   7   0   9    0.03    0.04
   7   0   9    0.03    0.05
  -7   0  -9    0.03    0.04
   8   0   9    0.00    0.05
  -8   0  -9   -0.05    0.04
   8   0   9    0.01    0.04
   9   0   9    0.06    0.05
   9   0   9   -0.04    0.04
  -9   0  -9   -0.08    0.03
  10   0   9   -0.03    0.05
  10   0   9    0.03    0.06
 -10   0  -9    0.08    0.06
  10  -1  -9    0.05    0.04
 -10  -1   9    0.09    0.05
 -10   1   9    0.03    0.04
  10   1  -9   -0.06    0.04
   9  -1  -9    0.19    0.06
  -9  -1   9    0.13    0.06
   9   1  -9    0.14    0.06
  -9   1   9    0.19    0.06
   8  -1  -9    0.15    0.05
  -8  -1   9    0.16    0.06
   8  -1  -9    0.20    0.05
   8   1  -9    0.15    0.06
  -8   1   9    0.16    0.06
   7  -1  -9    1.13    0.09
  -7  -1   9    0.99    0.11
   7  -1  -9    1.23    0.09
   7  -1  -9    1.21    0.15
  -7   1   9    1.00    0.11
   7   1  -9    0.98    0.10
   6  -1  -9    0.89    0.11
   6  -1  -9    0.92    0.07
   6  -1  -9    0.85    0.08
  -6  -1   9    0.90    0.09
   6   1  -9    0.78    0.08
  -6   1   9    1.08    0.09
   5  -1  -9    3.72    0.15
  -5  -1   9    4.37    0.21
  -5  -1   9    3.92    0.17
   5  -1  -9    4.24    0.20
   5  -1  -9    4.09    0.16
  -5  -1   9    4.29    0.15
  -5   1   9    3.89    0.17
   5   1  -9    3.91    0.17
   4  -1  -9   21.12    0.54
  -4  -1   9   21.72    0.60
  -4  -1   9   21.32    0.55
  -4  -1   9   20.51    0.55
   4  -1  -9   20.59    0.54
   4  -1  -9   20.92    0.59
   4   1  -9   19.95    0.55
  -4   1   9   20.50    0.55
  -4   1   9   20.41    0.53
  -3  -1   9    0.10    0.04
   3  -1  -9    0.10    0.03
  -3  -1   9    0.09    0.03
  -3  -1   9    0.11    0.03
   3  -1  -9    0.07    0.03
   3  -1  -9    0.11    0.03
  -3   1   9    0.06    0.03
   3   1  -9    0.11    0.03
  -3   1   9    0.14    0.03
  -3   1   9    0.15    0.04
   3   1  -9    0.14    0.02
   2  -1  -9   56.78    1.32
   2  -1  -9   55.60    1.36
  -2  -1   9   54.83    1.36
   2  -1  -9   53.56    1.32
  -2  -1   9   56.71    1.33
  -2   1   9   56.36    1.36
   2   1  -9   54.20    1.33
   2   1  -9   55.45    1.34
  -2   1   9   55.65    1.32
  -2   1   9   55.26    1.34
   1  -1  -9    1.18    0.06
  -1  -1   9    1.13    0.05
  -1  -1   9    1.22    0.07
   1   1  -9    1.18    0.06
   1   1  -9    1.20    0.04
  -1   1   9    1.29    0.08
  -1   1   9    1.25    0.05
  -1   1   9    1.03    0.07
   0  -1   9   14.10    0.37
   0  -1  -9   13.68    0.37
   0  -1   9   14.18    0.35
   0  -1  -9   13.97    0.36
   0  -1   9   14.26    0.35
   0   1  -9   13.87    0.35
   0   1  -9   14.77    0.38
   0   1   9   13.98    0.39
   0   1  -9   13.91    0.37
   0   1   9   13.82    0.38
   1  -1   9    0.45    0.03
  -1  -1  -9    0.47    0.05
   1  -1   9    0.48    0.03
  -1  -1  -9    0.50    0.04
   1  -1   9    0.38    0.04
  -1   1  -9    0.39    0.04
  -1   1  -9    0.48    0.03
  -1   1  -9    0.41    0.04
   1   1   9    0.43    0.05
   1   1   9    0.39    0.05
  -2  -1  -9    8.54    0.22
   2  -1   9    8.75    0.23
   2  -1   9    8.52    0.22
   2  -1   9    8.75    0.25
  -2  -1  -9    8.48    0.24
   2   1   9    8.70    0.27
  -2   1  -9    8.32    0.25
  -2   1  -9    8.86    0.23
  -2   1  -9    8.51    0.24
   2   1   9    9.04    0.26
   3  -1   9    9.93    0.26
   3  -1   9    9.79    0.27
  -3  -1  -9    9.74    0.28
  -3  -1  -9    9.47    0.25
   3  -1   9    9.43    0.26
  -3   1  -9    9.19    0.27
   3   1   9    9.53    0.27
  -3   1  -9    9.69    0.26
   3   1   9    9.20    0.30
  -3   1  -9    9.00    0.27
   3   1   9    9.16    0.27
   4  -1   9    0.39    0.05
  -4  -1  -9    0.32    0.05
   4  -1   9    0.34    0.05
  -4  -1  -9    0.43    0.04
   4  -1   9    0.38    0.04
  -4   1  -9    0.38    0.04
  -4   1  -9    0.34    0.05
   4   1   9    0.30    0.06
   4   1   9    0.37    0.05
   4   1   9    0.32    0.05
  -5  -1  -9    4.54    0.18
  -5  -1  -9    4.81    0.16
   5  -1   9    4.48    0.18
   5  -1   9    5.00    0.19
   5   1   9    4.64    0.18
   5   1   9    4.54    0.21
  -5   1  -9    4.69    0.16
  -5   1  -9    4.58    0.18
  -6  -1  -9    0.40    0.06
  -6  -1  -9    0.42    0.05
   6  -1   9    0.38    0.06
   6  -1   9    0.31    0.07
   6   1   9    0.48    0.09
  -6   1  -9    0.42    0.06
   6   1   9    0.33    0.06
  -6   1  -9    0.35    0.06
   7  -1   9    4.32    0.21
  -7  -1  -9    4.62    0.19
   7  -1   9    4.06    0.19
  -7   1  -9    4.17    0.19
   7   1   9    4.48    0.23
  -7   1  -9    4.65    0.18
   7   1   9    4.23    0.20
   8  -1   9    3.82    0.21
   8  -1   9    3.51    0.19
  -8  -1  -9    3.73    0.18
   8   1   9    3.73    0.22
  -8   1  -9    3.67    0.19
   8   1   9    3.82    0.20
   9  -1   9    0.02    0.04
  -9  -1  -9    0.09    0.05
   9  -1   9    0.01    0.06
   9   1   9    0.09    0.07
  -9   1  -9    0.00    0.04
   9   1   9    0.04    0.05
  10  -1   9    0.01    0.05
  10  -1   9    0.01    0.06
 -10  -1  -9    0.02    0.05
 -10   1  -9   -0.05    0.05
  10   1   9    0.00    0.04
  10   1   9    0.03    0.06
  -9  -2   9    0.01    0.04
   9  -2  -9    0.00    0.03
   9   2  -9    0.09    0.05
  -9   2   9    0.03    0.05
  -8  -2   9    0.08    0.05
   8  -2  -9    0.10    0.04
   8  -2  -9    0.02    0.05
  -8   2   9    0.15    0.06
   8   2  -9    0.02    0.04
  -7  -2   9    4.04    0.20
   7  -2  -9    4.35    0.19
   7  -2  -9    4.23    0.24
   7   2  -9    4.17    0.20
  -7   2   9    3.84    0.19
   6  -2  -9    0.26    0.06
   6  -2  -9    0.13    0.06
  -6  -2   9    0.11    0.05
   6  -2  -9    0.18    0.05
   6   2  -9    0.12    0.05
  -6   2   9    0.21    0.06
   5  -2  -9   17.42    0.49
  -5  -2   9   17.05    0.49
   5  -2  -9   17.27    0.47
   5  -2  -9   17.18    0.54
  -5  -2   9   17.40    0.55
   5   2  -9   16.88    0.49
  -5   2   9   17.09    0.49
   5   2  -9   18.52    0.48
  -4  -2   9    6.11    0.22
  -4  -2   9    6.19    0.25
   4  -2  -9    6.43    0.21
   4  -2  -9    5.89    0.25
   4  -2  -9    6.19    0.19
  -4   2   9    6.31    0.20
  -4   2   9    5.99    0.21
   4   2  -9    6.19    0.22
   4   2  -9    6.30    0.21
   3  -2  -9   16.18    0.40
   3  -2  -9   15.43    0.47
   3  -2  -9   16.03    0.43
  -3  -2   9   15.48    0.43
  -3  -2   9   15.48    0.46
  -3   2   9   15.47    0.42
   3   2  -9   15.60    0.43
  -3   2   9   16.07    0.43
   3   2  -9   15.59    0.43
   2  -2  -9    5.54    0.19
  -2  -2   9    5.69    0.21
   2  -2  -9    5.52    0.21
   2  -2  -9    6.25    0.16
  -2  -2   9    5.67    0.18
  -2   2   9    5.92    0.21
   2   2  -9    5.74    0.19
  -2   2   9    5.70    0.18
  -2   2   9    5.15    0.19
   2   2  -9    5.64    0.20
  -1  -2   9    0.97    0.07
   1  -2  -9    0.84    0.06
  -1  -2   9    0.86    0.06
   1  -2  -9    0.94    0.04
   1  -2  -9    0.94    0.08
  -1  -2   9    0.91    0.06
   1   2  -9    0.89    0.06
   1   2  -9    0.91    0.07
  -1   2   9    0.92    0.05
  -1   2   9    0.85    0.07
  -1   2   9    0.90    0.08
   0  -2  -9    4.55    0.18
   0  -2  -9    4.40    0.15
   0  -2   9    4.21    0.14
   0  -2   9    4.39    0.14
   0  -2   9    4.72    0.15
   0  -2  -9    4.67    0.13
   0  -2   9    4.45    0.13
   0   2   9    4.31    0.16
   0   2  -9    4.89    0.13
   0   2   9    4.42    0.18
   0   2  -9    4.17    0.15
   0   2  -9    4.21    0.16
   0   2   9    4.44    0.13
  -1  -2  -9    1.28    0.07
  -1  -2  -9    1.37    0.09
  -1  -2  -9    1.25    0.06
  -1  -2  -9    1.28    0.06
  -1   2  -9    1.30    0.06
   1   2   9    1.27    0.06
   1   2   9    1.20    0.08
  -1   2  -9    1.30    0.07
   1   2   9    1.36    0.09
  -1   2  -9    1.10    0.06
  -1   2  -9    1.24    0.08
  -2  -2  -9   38.34    0.91
  -2  -2  -9   39.25    0.97
  -2  -2  -9   38.35    0.91
  -2  -2  -9   37.00    0.93
  -2   2  -9   38.46    0.92
  -2   2  -9   36.33    0.93
  -2   2  -9   37.39    0.92
  -2   2  -9   37.20    0.93
   2   2   9   37.81    0.94
   2   2   9   38.76    0.97
   2   2   9   36.94    0.92
  -3  -2  -9   44.54    1.10
  -3  -2  -9   45.64    1.08
  -3   2  -9   43.57    1.10
  -3   2  -9   45.55    1.09
   3   2   9   46.41    1.15
  -3   2  -9   43.82    1.10
  -3   2  -9   44.61    1.09
   3   2   9   45.87    1.11
   3   2   9   44.74    1.10
   4  -2   9   29.11    0.74
  -4  -2  -9   30.22    0.78
   4  -2   9   30.45    0.78
  -4  -2  -9   30.89    0.76
   4  -2   9   31.88    0.82
   4   2   9   30.68    0.83
   4   2   9   30.81    0.78
   4   2   9   30.67    0.78
  -4   2  -9   29.80    0.78
  -4   2  -9   30.66    0.77
  -5  -2  -9    4.28    0.18
   5  -2   9    4.43    0.17
  -5  -2  -9    4.61    0.16
   5  -2   9    4.32    0.18
   5   2   9    4.70    0.22
   5   2   9    4.92    0.19
  -5   2  -9    4.62    0.19
  -5   2  -9    4.95    0.18
  -6  -2  -9    0.25    0.05
   6  -2   9    0.30    0.06
   6  -2   9    0.41    0.07
   6   2   9    0.31    0.06
  -6   2  -9    0.32    0.07
  -6   2  -9    0.33    0.05
   6   2   9    0.31    0.08
   7  -2   9    2.83    0.16
   7  -2   9    2.88    0.16
  -7  -2  -9    2.95    0.15
  -7   2  -9    3.20    0.15
   7   2   9    2.92    0.20
  -7   2  -9    3.16    0.16
   7   2   9    3.21    0.17
   8  -2   9    1.81    0.15
  -8  -2  -9    2.45    0.14
   8  -2   9    2.08    0.14
   8   2   9    2.35    0.15
  -8   2  -9    2.22    0.15
   9  -2   9    0.02    0.05
   9  -2   9    0.10    0.06
  -9  -2  -9    0.07    0.05
  -9   2  -9    0.04    0.06
   9   2   9    0.08    0.06
   9  -3  -9    0.10    0.05
  -9  -3   9   -0.01    0.04
   9  -3  -9   -0.06    0.04
   9   3  -9    0.16    0.06
  -9   3   9   -0.03    0.04
   8  -3  -9    0.36    0.10
   8  -3  -9    0.27    0.07
  -8  -3   9    0.27    0.07
   8   3  -9    0.26    0.07
  -8   3   9    0.40    0.08
  -7  -3   9    1.07    0.12
   7  -3  -9    0.94    0.14
   7  -3  -9    1.02    0.11
   7   3  -9    0.90    0.11
  -7   3   9    1.26    0.12
  -6  -3   9    1.42    0.11
   6  -3  -9    1.61    0.17
   6  -3  -9    1.62    0.12
  -6   3   9    1.41    0.11
   6   3  -9    1.64    0.12
  -5  -3   9    0.08    0.04
   5  -3  -9    0.03    0.05
  -5  -3   9    0.08    0.06
   5  -3  -9    0.06    0.04
   5   3  -9    0.04    0.04
   5   3  -9    0.02    0.04
  -5   3   9    0.07    0.04
  -4  -3   9   23.26    0.63
   4  -3  -9   22.89    0.63
   4  -3  -9   23.95    0.67
  -4  -3   9   22.74    0.67
  -4   3   9   23.64    0.63
   4   3  -9   22.51    0.63
   4   3  -9   23.49    0.62
  -4   3   9   22.67    0.61
   3  -3  -9    3.90    0.16
  -3  -3   9    4.04    0.19
  -3  -3   9    4.07    0.16
   3  -3  -9    3.97    0.19
  -3   3   9    3.98    0.16
   3   3  -9    3.69    0.16
  -3   3   9    3.65    0.15
   3   3  -9    4.23    0.17
  -2  -3   9   13.22    0.39
  -2  -3   9   12.67    0.37
   2  -3  -9   13.58    0.38
  -2  -3   9   12.78    0.37
   2  -3  -9   12.93    0.41
   2   3  -9   13.30    0.37
  -2   3   9   12.29    0.38
   2   3  -9   13.19    0.39
  -2   3   9   12.85    0.36
   1  -3  -9    6.48    0.21
  -1  -3   9    5.86    0.20
  -1  -3   9    5.68    0.20
   1  -3  -9    6.02    0.23
  -1  -3   9    6.08    0.20
  -1   3   9    6.03    0.22
  -1   3   9    6.31    0.19
   1   3  -9    6.17    0.20
   1   3  -9    6.32    0.22
   0  -3   9    5.54    0.15
   0  -3   9    5.40    0.16
   0  -3  -9    5.21    0.21
   0  -3   9    4.90    0.16
   0  -3   9    5.04    0.18
   0  -3  -9    4.96    0.18
   0  -3   9    4.98    0.18
   0   3   9    5.28    0.19
   0   3  -9    5.13    0.19
   0   3   9    5.28    0.17
   0   3  -9    5.42    0.18
  -1  -3  -9    0.13    0.04
  -1  -3  -9    0.03    0.03
  -1  -3  -9    0.12    0.03
  -1  -3  -9    0.12    0.03
  -1   3  -9    0.13    0.03
   1   3   9    0.04    0.03
  -1   3  -9    0.07    0.03
  -1   3  -9    0.09    0.03
  -1   3  -9    0.03    0.02
   1   3   9    0.09    0.02
  -2  -3  -9    0.52    0.08
  -2  -3  -9    0.58    0.05
  -2  -3  -9    0.64    0.07
  -2  -3  -9    0.46    0.05
   2   3   9    0.65    0.08
  -2   3  -9    0.52    0.05
   2   3   9    0.32    0.06
   2   3   9    0.48    0.05
  -2   3  -9    0.57    0.06
  -2   3  -9    0.41    0.05
  -2   3  -9    0.53    0.05
  -3  -3  -9    4.89    0.16
  -3  -3  -9    4.86    0.18
   3   3   9    4.94    0.25
  -3   3  -9    4.76    0.18
  -3   3  -9    4.77    0.17
  -3   3  -9    4.61    0.17
   3   3   9    5.08    0.19
   3   3   9    4.49    0.16
  -3   3  -9    4.88    0.17
  -4  -3  -9    0.68    0.06
   4  -3   9    0.81    0.08
   4  -3   9    0.66    0.04
  -4  -3  -9    0.64    0.07
  -4   3  -9    0.70    0.07
   4   3   9    0.65    0.08
  -4   3  -9    0.73    0.08
   4   3   9    0.71    0.07
   5  -3   9    0.88    0.09
  -5  -3  -9    0.94    0.09
   5  -3   9    0.78    0.06
  -5   3  -9    0.90    0.09
   5   3   9    0.83    0.09
   5   3   9    0.90    0.09
  -5   3  -9    0.83    0.08
  -6  -3  -9    4.25    0.18
   6  -3   9    3.81    0.17
   6  -3   9    4.13    0.18
   6   3   9    4.30    0.19
  -6   3  -9    4.26    0.19
  -6   3  -9    4.18    0.18
   7  -3   9    0.59    0.08
  -7  -3  -9    0.44    0.07
   7  -3   9    0.59    0.08
   7   3   9    0.54    0.08
  -7   3  -9    0.62    0.09
  -7   3  -9    0.56    0.08
   8  -3   9    0.13    0.06
  -8   3  -9    0.23    0.07
  -8   3  -9    0.16    0.04
   8   3   9    0.13    0.05
   9  -3   9    0.21    0.07
   9   3   9    0.21    0.06
  -9   3  -9    0.28    0.08
   8  -4  -9   -0.11    0.04
  -8  -4   9   -0.07    0.03
   8  -4  -9    0.08    0.05
   8   4  -9    0.03    0.04
  -8   4   9    0.08    0.05
   7  -4  -9   -0.05    0.04
   7  -4  -9    0.01    0.04
  -7  -4   9    0.01    0.04
   7   4  -9    0.09    0.04
  -7   4   9    0.02    0.04
   6  -4  -9    0.11    0.07
  -6  -4   9    0.16    0.06
   6  -4  -9    0.15    0.06
  -6   4   9    0.05    0.05
   6   4  -9    0.17    0.05
   5  -4  -9    8.20    0.33
  -5  -4   9    7.61    0.29
  -5  -4   9    8.72    0.35
   5  -4  -9    8.19    0.30
   5   4  -9    7.97    0.29
   5   4  -9    7.78    0.29
  -5   4   9    7.78    0.29
   4  -4  -9    2.49    0.14
  -4  -4   9    2.19    0.16
   4  -4  -9    2.03    0.15
  -4  -4   9    2.07    0.13
   4   4  -9    2.32    0.14
  -4   4   9    2.26    0.12
   4   4  -9    2.11    0.12
  -4   4   9    2.35    0.13
  -3  -4   9   11.13    0.38
   3  -4  -9   11.22    0.39
   3  -4  -9   11.12    0.35
  -3  -4   9   10.73    0.35
   3   4  -9   11.29    0.34
  -3   4   9   10.17    0.34
  -3   4   9   10.76    0.34
   3   4  -9   10.54    0.35
  -2  -4   9    0.13    0.04
  -2  -4   9    0.10    0.04
   2  -4  -9    0.08    0.04
   2  -4  -9    0.07    0.05
  -2  -4   9    0.21    0.06
  -2   4   9    0.10    0.04
   2   4  -9    0.12    0.04
  -2   4   9    0.09    0.04
   2   4  -9    0.12    0.05
   1  -4  -9    9.55    0.34
  -1  -4   9    8.71    0.29
   1  -4  -9    9.01    0.29
  -1  -4   9    9.03    0.29
  -1  -4   9    8.87    0.30
   1   4  -9    8.77    0.31
   1   4  -9    9.45    0.28
  -1   4   9    9.14    0.28
  -1   4   9    9.64    0.31
   0  -4  -9    3.04    0.14
   0  -4  -9    3.11    0.17
   0  -4   9    3.04    0.13
   0  -4   9    2.83    0.14
   0  -4   9    2.82    0.14
   0   4  -9    2.86    0.12
   0   4   9    3.00    0.15
   0   4   9    2.92    0.13
   0   4  -9    2.87    0.15
   1  -4   9    1.51    0.08
  -1  -4  -9    1.74    0.10
  -1  -4  -9    1.52    0.13
   1  -4   9    1.51    0.10
  -1  -4  -9    1.50    0.09
   1  -4   9    1.47    0.10
  -1  -4  -9    1.50    0.09
   1   4   9    1.54    0.11
  -1   4  -9    1.61    0.11
  -1   4  -9    1.57    0.08
  -2  -4  -9    3.27    0.14
   2  -4   9    3.20    0.10
  -2  -4  -9    3.42    0.14
  -2  -4  -9    3.45    0.19
   2  -4   9    3.35    0.14
  -2  -4  -9    3.07    0.14
  -2   4  -9    3.32    0.13
   2   4   9    3.13    0.16
  -2   4  -9    3.45    0.16
  -2   4  -9    3.25    0.15
  -3  -4  -9    2.62    0.12
   3  -4   9    2.60    0.13
  -3  -4  -9    2.62    0.12
  -3  -4  -9    2.54    0.13
   3   4   9    2.41    0.14
  -3   4  -9    2.59    0.13
  -3   4  -9    2.65    0.13
   4  -4   9    3.65    0.12
  -4  -4  -9    3.51    0.16
  -4  -4  -9    3.85    0.16
  -4   4  -9    3.86    0.17
  -4   4  -9    3.77    0.17
   4   4   9    3.69    0.18
   5  -4   9    0.04    0.03
  -5  -4  -9   -0.02    0.03
   5   4   9    0.02    0.03
  -5   4  -9    0.05    0.04
  -5   4  -9   -0.04    0.03
   5   4   9    0.05    0.04
   6  -4   9    0.86    0.08
  -6  -4  -9    0.80    0.09
   6   4   9    0.76    0.09
  -6   4  -9    1.03    0.10
  -6   4  -9    0.90    0.11
   7  -4   9    0.13    0.05
   7   4   9    0.20    0.06
  -7   4  -9    0.20    0.07
  -7   4  -9    0.25    0.06
   8  -4   9    0.09    0.05
   8  -4   9   -0.07    0.04
  -8   4  -9    0.05    0.04
  -8   4  -9    0.12    0.06
   8   4   9    0.05    0.04
  -7  -5   9    0.75    0.11
   7  -5  -9    0.94    0.15
   7  -5  -9    1.03    0.13
  -7   5   9    0.81    0.11
   7   5  -9    1.26    0.13
   6  -5  -9    0.72    0.12
  -6  -5   9    0.78    0.11
   6  -5  -9    0.79    0.11
  -6   5   9    0.72    0.10
   6   5  -9    0.59    0.08
   5  -5  -9    0.59    0.11
  -5  -5   9    0.60    0.11
   5  -5  -9    0.59    0.10
  -5  -5   9    0.67    0.10
  -5   5   9    0.56    0.09
   5   5  -9    0.59    0.08
   5   5  -9    0.68    0.10
   4  -5  -9    4.28    0.24
   4  -5  -9    4.55    0.21
  -4  -5   9    4.80    0.25
  -4  -5   9    4.42    0.21
   4   5  -9    4.72    0.22
  -4   5   9    4.45    0.20
   4   5  -9    4.60    0.19
  -4   5   9    4.73    0.20
   3  -5  -9    5.99    0.24
  -3  -5   9    5.54    0.24
  -3  -5   9    5.98    0.27
  -3  -5   9    5.55    0.24
   3  -5  -9    5.73    0.27
   3   5  -9    5.66    0.25
  -3   5   9    5.80    0.23
  -3   5   9    6.20    0.24
   3   5  -9    6.19    0.26
  -2  -5   9   -0.01    0.04
  -2  -5   9    0.01    0.04
  -2  -5   9    0.04    0.04
   2  -5  -9    0.00    0.04
   2  -5  -9    0.04    0.04
  -2   5   9    0.00    0.03
  -2   5   9    0.05    0.04
   2   5  -9    0.02    0.04
  -1  -5   9    0.16    0.05
   1  -5  -9    0.10    0.06
  -1  -5   9    0.17    0.06
  -1  -5   9    0.10    0.05
   1  -5  -9    0.10    0.05
  -1   5   9    0.04    0.04
   1   5  -9    0.14    0.05
  -1   5   9    0.14    0.04
   0  -5   9    0.52    0.08
   0  -5  -9    0.52    0.07
   0  -5  -9    0.46    0.07
   0  -5   9    0.46    0.08
   0  -5   9    0.53    0.07
   0  -5  -9    0.45    0.07
   0   5  -9    0.47    0.08
   0   5   9    0.44    0.08
   1  -5   9    4.24    0.17
  -1  -5  -9    4.28    0.18
   1  -5   9    4.10    0.19
   1  -5   9    4.10    0.19
  -1  -5  -9    4.45    0.18
  -1  -5  -9    4.19    0.18
  -1  -5  -9    4.26    0.23
  -1   5  -9    4.19    0.20
   1   5   9    4.21    0.20
  -2  -5  -9    1.69    0.11
  -2  -5  -9    1.82    0.11
   2  -5   9    1.81    0.10
  -2  -5  -9    2.06    0.12
  -2   5  -9    1.86    0.13
  -2   5  -9    1.72    0.12
   2   5   9    1.69    0.13
  -3  -5  -9    0.82    0.09
   3  -5   9    0.77    0.10
  -3  -5  -9    0.84    0.09
   3  -5   9    0.85    0.07
  -3  -5  -9    0.79    0.09
   3   5   9    0.91    0.11
  -3   5  -9    0.87    0.10
  -3   5  -9    0.82    0.10
   4  -5   9    0.01    0.03
   4  -5   9    0.03    0.03
  -4  -5  -9    0.02    0.03
   4   5   9   -0.02    0.04
  -4   5  -9    0.05    0.04
   5  -5   9    0.19    0.06
   5  -5   9    0.16    0.04
   5   5   9    0.14    0.05
  -5   5  -9    0.23    0.06
   6  -5   9   -0.02    0.03
   6  -5   9    0.01    0.05
  -6   5  -9    0.00    0.04
   7  -5   9    1.80    0.15
   7  -5   9    1.66    0.12
  -7   5  -9    1.57    0.13
   6  -6  -9   -0.07    0.04
   6  -6  -9   -0.02    0.04
  -6  -6   9   -0.02    0.04
  -6   6   9    0.07    0.05
  -5  -6   9    0.09    0.07
   5  -6  -9    0.05    0.06
   5  -6  -9    0.07    0.05
  -5  -6   9    0.09    0.06
  -5   6   9    0.05    0.05
   5   6  -9    0.04    0.04
  -4  -6   9    0.18    0.07
   4  -6  -9    0.20    0.08
   4  -6  -9    0.35    0.08
  -4  -6   9    0.17    0.07
   4   6  -9    0.29    0.08
  -4   6   9    0.34    0.07
   3  -6  -9    0.06    0.05
  -3  -6   9   -0.02    0.05
  -3  -6   9    0.07    0.05
  -3  -6   9    0.01    0.05
   3  -6  -9    0.00    0.05
  -3   6   9    0.07    0.05
  -3   6   9    0.00    0.04
   3   6  -9    0.06    0.06
  -2  -6   9    0.29    0.07
   2  -6  -9    0.29    0.08
  -2  -6   9    0.25    0.07
  -2  -6   9    0.33    0.08
   2  -6  -9    0.17    0.06
  -2   6   9    0.33    0.07
  -2   6   9    0.29    0.07
   2   6  -9    0.26    0.08
   1  -6  -9    1.03    0.11
  -1  -6   9    1.10    0.12
  -1  -6   9    1.00    0.12
  -1  -6   9    0.97    0.12
   1  -6  -9    1.11    0.14
  -1   6   9    1.04    0.12
  -1   6   9    1.01    0.11
   1   6  -9    1.09    0.13
   0  -6  -9    0.13    0.05
   0  -6  -9    0.04    0.05
   0  -6   9   -0.01    0.04
   0  -6   9    0.07    0.05
   0  -6  -9    0.10    0.05
   0  -6  -9    0.11    0.05
   0  -6   9    0.02    0.05
   0   6   9    0.07    0.05
   0   6  -9    0.01    0.05
   1  -6   9    0.33    0.07
  -1  -6  -9    0.29    0.06
  -1  -6  -9    0.35    0.07
   1  -6   9    0.39    0.08
  -1  -6  -9    0.56    0.11
  -1  -6  -9    0.41    0.07
   1  -6   9    0.41    0.08
  -1   6  -9    0.35    0.08
   1   6   9    0.27    0.07
  -2  -6  -9    0.06    0.04
  -2  -6  -9   -0.01    0.03
   2  -6   9   -0.02    0.04
   2  -6   9    0.01    0.04
  -2  -6  -9    0.03    0.03
   2  -6   9   -0.01    0.05
  -2   6  -9    0.05    0.04
   2   6   9    0.06    0.05
   3  -6   9    0.71    0.08
  -3   6  -9    0.84    0.10
  -3   6  -9    0.85    0.11
   3   6   9    0.71    0.11
   4  -6   9    0.47    0.07
   4   6   9    0.43    0.09
  -4   6  -9    0.38    0.07
   5  -6   9    1.49    0.11
  -5   6  -9    1.46    0.15
   5   6   9    1.49    0.13
   6  -6   9    0.08    0.04
   6  -6   9    0.10    0.05
  -6   6  -9   -0.05    0.04
   4  -7  -9    0.47    0.10
  -4  -7   9    0.48    0.10
   4  -7  -9    0.24    0.08
   4   7  -9    0.49    0.10
  -4   7   9    0.52    0.09
  -3  -7   9    0.00    0.05
  -3  -7   9    0.04    0.06
  -3  -7   9    0.07    0.06
   3  -7  -9    0.15    0.06
   3  -7  -9    0.25    0.08
  -3   7   9    0.10    0.05
   3   7  -9    0.05    0.06
  -3   7   9    0.11    0.05
  -2  -7   9    0.17    0.07
   2  -7  -9    0.15    0.06
  -2  -7   9    0.06    0.06
   2  -7  -9    0.06    0.06
  -2  -7   9    0.15    0.06
  -2   7   9    0.01    0.04
   2   7  -9    0.08    0.06
  -2   7   9    0.14    0.06
  -1  -7   9    0.45    0.09
   1  -7  -9    0.41    0.09
  -1  -7   9    0.41    0.09
  -1  -7   9    0.57    0.11
   1  -7  -9    0.39    0.08
   1  -7  -9    0.42    0.08
   1  -7  -9    0.45    0.08
   1   7  -9    0.45    0.10
  -1   7   9    0.62    0.11
   0  -7   9    1.07    0.13
   0  -7  -9    0.99    0.11
   0  -7  -9    1.23    0.16
   0  -7   9    1.22    0.14
   0  -7  -9    1.08    0.12
   0  -7  -9    1.05    0.12
   0  -7   9    1.08    0.13
   0   7   9    1.32    0.15
   0   7  -9    1.08    0.14
   1  -7   9    0.05    0.06
  -1  -7  -9   -0.02    0.03
   1  -7   9   -0.02    0.05
   1  -7   9    0.02    0.05
  -1  -7  -9    0.12    0.04
  -1   7  -9    0.06    0.05
   1   7   9    0.09    0.06
   2  -7   9    1.89    0.16
   2  -7   9    1.57    0.16
   2  -7   9    1.55    0.13
   2   7   9    1.60    0.17
  -2   7  -9    1.85    0.14
   3  -7   9    0.61    0.11
   3  -7   9    0.50    0.08
   3  -7   9    0.60    0.11
   3   7   9    0.46    0.09
 -10   0  10    0.30    0.07
  10   0 -10    0.14    0.06
   9   0 -10    5.02    0.23
  -9   0  10    4.98    0.24
  -8   0  10    4.76    0.23
   8   0 -10    5.41    0.23
   7   0 -10    4.48    0.20
  -7   0  10    4.68    0.20
  -6   0  10    5.02    0.20
   6   0 -10    5.10    0.20
  -5   0  10    1.10    0.08
  -5   0  10    1.25    0.09
   5   0 -10    1.18    0.09
   5   0 -10    1.25    0.07
  -4   0  10    0.05    0.03
  -4   0  10    0.03    0.03
   4   0 -10    0.03    0.03
   4   0 -10    0.03    0.02
  -4   0  10    0.00    0.03
   4   0 -10    0.01    0.03
   3   0 -10    1.31    0.06
   3   0 -10    1.34    0.09
  -3   0  10    1.56    0.08
  -3   0  10    1.30    0.08
   3   0 -10    1.35    0.08
  -2   0  10   57.44    1.44
   2   0 -10   61.67    1.42
  -2   0  10   61.17    1.42
   2   0 -10   59.29    1.43
   1   0 -10   90.14    2.15
  -1   0  10   95.65    2.13
  -1   0  10   93.64    2.18
   1   0 -10   85.60    2.13
  -1   0  10   89.31    2.16
   0   0 -10   26.42    0.63
   0   0  10   25.22    0.65
   0   0  10   25.48    0.65
   0   0 -10   25.39    0.64
   1   0  10  153.60    3.58
  -1   0 -10  149.42    3.57
  -1   0 -10  155.56    3.57
   1   0  10  152.06    3.58
  -2   0 -10    5.18    0.16
   2   0  10    5.10    0.16
   2   0  10    5.13    0.17
  -2   0 -10    4.57    0.16
   3   0  10   65.60    1.56
  -3   0 -10   63.77    1.57
   3   0  10   63.47    1.57
  -3   0 -10   65.03    1.57
  -3   0 -10   68.36    1.53
  -4   0 -10   17.72    0.44
   4   0  10   17.06    0.47
  -4   0 -10   16.76    0.46
   4   0  10   17.12    0.45
   4   0  10   17.09    0.48
   5   0  10    7.06    0.26
  -5   0 -10    7.22    0.21
   5   0  10    6.89    0.24
  -5   0 -10    6.82    0.24
   6   0  10    3.45    0.18
  -6   0 -10    3.37    0.16
   6   0  10    3.62    0.17
   7   0  10    5.14    0.22
  -7   0 -10    5.37    0.22
   7   0  10    5.07    0.25
  -8   0 -10    0.03    0.05
   8   0  10    0.00    0.05
   8   0  10    0.06    0.06
  -9   0 -10    0.56    0.09
   9   0  10    0.65    0.10
   9   0  10    0.57    0.12
 -10   0 -10    8.97    0.35
  10   0  10    9.20    0.37
  10   0  10    8.87    0.40
 -10  -1  10    0.99    0.14
  10   1 -10    1.00    0.13
 -10   1  10    1.02    0.14
  -9  -1  10    0.85    0.12
   9  -1 -10    1.04    0.11
   9   1 -10    0.96    0.12
  -9   1  10    0.96    0.12
   8  -1 -10    6.24    0.25
  -8  -1  10    5.76    0.26
   8   1 -10    6.16    0.26
  -8   1  10    5.98    0.26
  -7  -1  10    0.32    0.07
   7  -1 -10    0.31    0.06
   7  -1 -10    0.29    0.05
   7   1 -10    0.28    0.06
  -7   1  10    0.28    0.07
   6  -1 -10    1.86    0.15
   6  -1 -10    1.91    0.11
   6  -1 -10    1.91    0.11
  -6  -1  10    1.78    0.12
   6   1 -10    1.80    0.12
  -6   1  10    1.79    0.12
  -5  -1  10    0.45    0.06
   5  -1 -10    0.36    0.08
  -5  -1  10    0.52    0.06
  -5  -1  10    0.38    0.08
   5  -1 -10    0.41    0.06
   5  -1 -10    0.50    0.06
  -5   1  10    0.46    0.06
   5   1 -10    0.37    0.06
  -4  -1  10   10.77    0.32
   4  -1 -10   10.91    0.31
   4  -1 -10   10.71    0.31
  -4  -1  10   10.91    0.32
  -4  -1  10   11.20    0.37
   4  -1 -10   10.87    0.36
  -4   1  10   10.48    0.32
   4   1 -10   10.64    0.32
  -4   1  10   10.95    0.31
  -3  -1  10   10.00    0.33
  -3  -1  10    9.98    0.29
   3  -1 -10    9.87    0.32
   3  -1 -10    9.90    0.28
   3  -1 -10    9.61    0.28
  -3  -1  10    9.72    0.29
  -3   1  10    9.90    0.28
   3   1 -10   10.32    0.25
  -3   1  10    9.84    0.29
   2  -1 -10    2.71    0.13
  -2  -1  10    2.41    0.10
   2  -1 -10    2.23    0.10
   2  -1 -10    2.51    0.09
  -2  -1  10    2.28    0.12
  -2   1  10    2.62    0.11
   2   1 -10    2.40    0.07
   2   1 -10    2.34    0.10
  -2   1  10    2.53    0.09
  -2   1  10    2.25    0.12
   1  -1 -10   13.08    0.33
  -1  -1  10   12.76    0.33
   1  -1 -10   12.67    0.34
   1  -1 -10   12.89    0.37
  -1  -1  10   11.59    0.35
   1   1 -10   11.79    0.34
  -1   1  10   12.84    0.32
  -1   1  10   12.81    0.37
   1   1 -10   13.24    0.31
   0  -1 -10   45.30    1.08
   0  -1  10   46.26    1.07
   0  -1  10   43.69    1.09
   0  -1 -10   45.12    1.09
   0  -1  10   46.15    1.07
   0  -1  10   43.80    1.10
   0   1 -10   45.20    1.09
   0   1  10   44.22    1.10
   0   1  10   44.07    1.11
   0   1 -10   46.13    1.07
   1  -1  10    1.02    0.05
   1  -1  10    1.04    0.07
   1  -1  10    1.09    0.05
   1  -1  10    1.18    0.05
   1  -1  10    1.07    0.05
  -1  -1 -10    0.90    0.05
  -1  -1 -10    1.06    0.06
   1   1  10    0.90    0.07
   1   1  10    1.07    0.07
  -1   1 -10    1.10    0.05
  -1   1 -10    1.01    0.06
   2  -1  10   23.46    0.58
  -2  -1 -10   23.72    0.60
   2  -1  10   23.46    0.60
   2  -1  10   23.96    0.58
  -2  -1 -10   23.08    0.60
  -2   1 -10   23.72    0.60
   2   1  10   24.87    0.61
  -2   1 -10   23.90    0.61
   2   1  10   23.25    0.63
  -2   1 -10   24.65    0.58
   3  -1  10   11.68    0.32
   3  -1  10   11.33    0.31
  -3  -1 -10   12.03    0.29
   3  -1  10   12.04    0.31
  -3  -1 -10   11.34    0.33
  -3   1 -10   10.95    0.32
   3   1  10   11.31    0.33
  -3   1 -10   11.45    0.32
   3   1  10   11.86    0.33
   3   1  10   11.09    0.35
  -3   1 -10   11.77    0.30
   4  -1  10   19.90    0.55
   4  -1  10   19.90    0.53
  -4  -1 -10   20.56    0.51
  -4  -1 -10   19.99    0.54
   4  -1  10   21.03    0.52
   4   1  10   20.21    0.55
   4   1  10   20.84    0.58
  -4   1 -10   21.28    0.52
  -4   1 -10   20.19    0.54
   4   1  10   20.80    0.53
  -5  -1 -10    0.20    0.05
   5  -1  10    0.13    0.04
   5  -1  10    0.21    0.05
   5   1  10    0.19    0.06
  -5   1 -10    0.19    0.04
   5   1  10    0.11    0.04
  -5   1 -10    0.19    0.04
   6  -1  10    1.30    0.11
   6  -1  10    1.30    0.10
  -6  -1 -10    1.12    0.09
   6   1  10    1.27    0.13
  -6   1 -10    1.12    0.08
   6   1  10    1.17    0.11
  -6   1 -10    1.26    0.10
   7  -1  10    2.15    0.14
   7  -1  10    2.08    0.15
  -7  -1 -10    2.04    0.13
  -7   1 -10    2.03    0.13
   7   1  10    2.18    0.16
   7   1  10    2.00    0.14
  -8  -1 -10    0.74    0.09
   8  -1  10    0.65    0.11
   8  -1  10    0.61    0.09
  -8   1 -10    0.72    0.10
   8   1  10    0.55    0.09
   8   1  10    0.72    0.12
  -9  -1 -10    2.47    0.16
   9  -1  10    2.32    0.16
   9  -1  10    2.34    0.18
  -9   1 -10    2.01    0.15
   9   1  10    2.13    0.18
   9   1  10    2.58    0.17
  10  -1  10    0.02    0.06
  10  -1  10    0.06    0.06
 -10  -1 -10    0.05    0.04
 -10   1 -10   -0.03    0.05
  10   1  10    0.05    0.04
  -9  -2  10    0.09    0.06
   9  -2 -10    0.20    0.05
  -9   2  10    0.19    0.06
   9   2 -10    0.10    0.06
  -8  -2  10    0.06    0.05
   8  -2 -10    0.00    0.03
  -8   2  10   -0.01    0.04
   8   2 -10    0.00    0.04
   7  -2 -10    9.08    0.36
   7  -2 -10    8.84    0.30
  -7  -2  10    7.84    0.30
   7   2 -10    8.37    0.31
  -7   2  10    7.74    0.30
  -6  -2  10    1.64    0.12
   6  -2 -10    1.86    0.15
   6  -2 -10    1.74    0.11
   6   2 -10    1.65    0.12
  -6   2  10    1.78    0.12
  -5  -2  10    0.36    0.08
  -5  -2  10    0.27    0.06
   5  -2 -10    0.25    0.05
   5  -2 -10    0.40    0.05
   5  -2 -10    0.27    0.07
   5   2 -10    0.28    0.05
   5   2 -10    0.24    0.05
  -5   2  10    0.39    0.06
   4  -2 -10    0.02    0.04
   4  -2 -10    0.01    0.03
  -4  -2  10    0.04    0.03
  -4  -2  10   -0.01    0.04
   4  -2 -10    0.00    0.02
  -4   2  10   -0.01    0.02
  -4   2  10    0.01    0.02
   4   2 -10    0.01    0.03
   4   2 -10    0.02    0.03
  -3  -2  10    0.72    0.09
   3  -2 -10    0.86    0.10
  -3  -2  10    0.73    0.06
   3  -2 -10    0.80    0.05
   3  -2 -10    0.67    0.07
  -3   2  10    0.78    0.06
   3   2 -10    0.59    0.06
   3   2 -10    0.77    0.08
  -3   2  10    0.72    0.06
   2  -2 -10   14.43    0.40
  -2  -2  10   14.27    0.42
   2  -2 -10   14.76    0.37
   2  -2 -10   14.19    0.43
  -2  -2  10   14.52    0.39
  -2   2  10   14.83    0.43
  -2   2  10   14.57    0.40
  -2   2  10   14.54    0.39
   2   2 -10   14.89    0.40
   2   2 -10   14.54    0.41
  -1  -2  10    0.94    0.06
  -1  -2  10    0.70    0.06
   1  -2 -10    0.63    0.06
   1  -2 -10    0.74    0.08
   1  -2 -10    0.86    0.04
  -1  -2  10    0.84    0.05
  -1   2  10    0.63    0.06
   1   2 -10    0.76    0.06
  -1   2  10    0.80    0.05
  -1   2  10    0.68    0.07
   1   2 -10    0.64    0.05
   0  -2 -10    1.31    0.09
   0  -2 -10    1.21    0.07
   0  -2  10    1.35    0.07
   0  -2  10    1.31    0.06
   0  -2  10    1.30    0.06
   0  -2 -10    1.38    0.06
   0  -2  10    1.19    0.06
   0   2 -10    1.23    0.07
   0   2 -10    1.30    0.08
   0   2  10    1.25    0.08
   0   2  10    1.32    0.06
   0   2 -10    1.31    0.05
   0   2  10    1.37    0.09
  -1  -2 -10   12.43    0.32
  -1  -2 -10   12.72    0.33
  -1  -2 -10   12.70    0.38
  -1  -2 -10   12.36    0.35
  -1  -2 -10   13.00    0.32
  -1   2 -10   12.20    0.33
  -1   2 -10   12.42    0.35
   1   2  10   12.69    0.38
   1   2  10   12.13    0.36
  -1   2 -10   12.39    0.34
  -1   2 -10   12.64    0.33
  -2  -2 -10    0.03    0.01
  -2  -2 -10    0.10    0.03
  -2  -2 -10    0.03    0.02
   2   2  10    0.02    0.03
  -2   2 -10    0.01    0.02
  -2   2 -10    0.05    0.02
   2   2  10    0.03    0.02
   2   2  10    0.05    0.04
  -2   2 -10    0.04    0.02
  -2   2 -10    0.03    0.02
  -3  -2 -10   28.11    0.73
  -3  -2 -10   28.56    0.70
   3   2  10   29.95    0.74
  -3   2 -10   28.55    0.73
  -3   2 -10   28.79    0.72
   3   2  10   28.48    0.73
   3   2  10   28.57    0.78
  -3   2 -10   28.60    0.73
  -3   2 -10   29.76    0.73
   4  -2  10    0.19    0.04
   4  -2  10    0.24    0.03
  -4  -2 -10    0.24    0.05
   4   2  10    0.22    0.06
   4   2  10    0.19    0.04
   4   2  10    0.23    0.05
  -4   2 -10    0.16    0.04
  -4   2 -10    0.22    0.05
   5  -2  10    4.75    0.18
   5  -2  10    4.48    0.17
  -5  -2 -10    4.52    0.18
   5   2  10    5.01    0.23
  -5   2 -10    4.90    0.18
   5   2  10    4.59    0.19
  -5   2 -10    4.74    0.19
   6  -2  10    0.46    0.07
   6  -2  10    0.60    0.08
  -6  -2 -10    0.48    0.07
  -6   2 -10    0.54    0.07
  -6   2 -10    0.51    0.08
   6   2  10    0.47    0.07
   6   2  10    0.58    0.10
   7  -2  10    1.58    0.12
   7  -2  10    1.66    0.12
  -7  -2 -10    1.81    0.12
   7   2  10    2.02    0.13
   7   2  10    1.75    0.15
  -7   2 -10    1.43    0.12
  -7   2 -10    1.55    0.13
  -8  -2 -10    2.46    0.15
   8  -2  10    2.80    0.17
   8  -2  10    3.10    0.17
  -8   2 -10    2.67    0.16
   8   2  10    2.83    0.17
   9  -2  10    2.08    0.15
  -9  -2 -10    2.23    0.14
   9  -2  10    2.10    0.17
  -9   2 -10    2.11    0.16
   9   2  10    2.15    0.16
   9  -3 -10    0.20    0.06
  -9  -3  10    0.45    0.09
  -9   3  10    0.27    0.08
   9   3 -10    0.19    0.06
   8  -3 -10   -0.04    0.05
  -8  -3  10    0.11    0.06
   8  -3 -10    0.01    0.04
   8   3 -10   -0.01    0.04
  -8   3  10    0.05    0.05
   7  -3 -10    8.21    0.35
  -7  -3  10    7.56    0.30
   7  -3 -10    7.46    0.28
  -7   3  10    6.57    0.28
   7   3 -10    6.83    0.28
   6  -3 -10    0.03    0.05
   6  -3 -10    0.01    0.04
  -6  -3  10    0.03    0.04
  -6   3  10    0.07    0.05
   6   3 -10   -0.01    0.03
   5  -3 -10    0.11    0.04
  -5  -3  10    0.07    0.04
   5  -3 -10    0.22    0.07
  -5  -3  10    0.18    0.07
   5   3 -10    0.09    0.04
  -5   3  10    0.08    0.04
   5   3 -10    0.11    0.04
  -4  -3  10    0.81    0.09
   4  -3 -10    0.79    0.08
  -4  -3  10    0.77    0.11
   4  -3 -10    0.68    0.10
  -4   3  10    1.09    0.08
  -4   3  10    0.75    0.08
   4   3 -10    0.76    0.09
   4   3 -10    0.58    0.07
   3  -3 -10    1.75    0.13
   3  -3 -10    1.78    0.11
  -3  -3  10    1.83    0.11
  -3  -3  10    1.56    0.12
  -3   3  10    1.91    0.11
   3   3 -10    1.83    0.11
  -3   3  10    1.87    0.10
   3   3 -10    1.73    0.10
  -2  -3  10    0.48    0.07
   2  -3 -10    0.41    0.06
   2  -3 -10    0.31    0.06
  -2  -3  10    0.29    0.05
  -2  -3  10    0.37    0.06
   2   3 -10    0.33    0.05
  -2   3  10    0.43    0.06
   2   3 -10    0.40    0.06
  -2   3  10    0.48    0.05
  -1  -3  10   13.16    0.37
   1  -3 -10   12.30    0.41
  -1  -3  10   13.11    0.37
   1  -3 -10   12.86    0.37
  -1  -3  10   12.84    0.37
   1   3 -10   13.06    0.36
  -1   3  10   13.13    0.35
  -1   3  10   13.09    0.38
   1   3 -10   12.91    0.38
   0  -3  10   23.08    0.60
   0  -3 -10   22.11    0.60
   0  -3  10   23.34    0.60
   0  -3 -10   23.88    0.65
   0  -3  10   23.01    0.58
   0   3  10   23.17    0.58
   0   3 -10   23.63    0.60
   0   3  10   22.34    0.62
   0   3 -10   23.24    0.62
   1  -3  10    1.30    0.08
   1  -3  10    1.20    0.08
   1  -3  10    1.33    0.05
  -1  -3 -10    1.12    0.08
  -1  -3 -10    1.31    0.07
  -1  -3 -10    1.30    0.10
  -1  -3 -10    1.34    0.07
  -1   3 -10    1.21    0.07
  -1   3 -10    1.28    0.07
   1   3  10    1.30    0.06
   1   3  10    1.27    0.09
  -1   3 -10    1.18    0.08
  -2  -3 -10    1.45    0.07
  -2  -3 -10    1.47    0.08
  -2  -3 -10    1.44    0.13
  -2  -3 -10    1.44    0.09
  -2   3 -10    1.54    0.08
  -2   3 -10    1.40    0.09
   2   3  10    1.37    0.10
  -2   3 -10    1.39    0.08
   2   3  10    1.20    0.11
   2   3  10    1.39    0.07
  -2   3 -10    1.39    0.08
  -3  -3 -10    0.35    0.05
  -3  -3 -10    0.33    0.04
  -3   3 -10    0.52    0.06
   3   3  10    0.42    0.08
  -3   3 -10    0.31    0.05
   3   3  10    0.42    0.05
  -3   3 -10    0.46    0.06
  -3   3 -10    0.40    0.05
   3   3  10    0.42    0.06
  -4  -3 -10    7.03    0.24
   4  -3  10    6.67    0.23
  -4   3 -10    7.19    0.24
   4   3  10    7.03    0.23
   4   3  10    6.84    0.25
  -4   3 -10    6.91    0.24
   5  -3  10    2.68    0.11
   5  -3  10    2.66    0.13
  -5  -3 -10    2.70    0.13
   5   3  10    2.56    0.13
   5   3  10    2.52    0.14
  -5   3 -10    2.47    0.13
  -5   3 -10    2.57    0.13
  -6  -3 -10    1.37    0.10
   6  -3  10    1.24    0.09
   6  -3  10    1.38    0.10
   6   3  10    1.23    0.10
  -6   3 -10    1.47    0.11
  -6   3 -10    1.50    0.10
  -7  -3 -10    1.50    0.11
   7  -3  10    1.77    0.12
   7  -3  10    1.58    0.11
  -7   3 -10    1.60    0.11
  -7   3 -10    1.64    0.13
   7   3  10    1.86    0.13
  -8  -3 -10    0.35    0.07
   8  -3  10    0.31    0.07
  -8   3 -10    0.20    0.07
   8   3  10    0.42    0.08
   9  -3  10    0.16    0.07
  -9   3 -10    0.20    0.07
   9   3  10    0.26    0.07
   8  -4 -10    0.22    0.08
  -8  -4  10    0.26    0.07
   8  -4 -10    0.11    0.05
   8   4 -10    0.09    0.05
  -8   4  10    0.15    0.06
   7  -4 -10    0.02    0.05
  -7  -4  10    0.01    0.04
   7  -4 -10   -0.05    0.04
   7   4 -10   -0.03    0.03
  -7   4  10    0.02    0.05
   6  -4 -10    0.86    0.13
   6  -4 -10    0.65    0.09
  -6  -4  10    0.77    0.10
   6   4 -10    0.64    0.09
  -6   4  10    0.60    0.09
  -5  -4  10    2.75    0.16
   5  -4 -10    2.93    0.16
  -5  -4  10    2.87    0.19
   5  -4 -10    2.74    0.19
  -5   4  10    2.76    0.15
   5   4 -10    2.59    0.15
   5   4 -10    2.82    0.15
   4  -4 -10    0.93    0.10
   4  -4 -10    1.09    0.13
  -4  -4  10    1.09    0.13
  -4  -4  10    1.18    0.11
   4   4 -10    1.18    0.10
   4   4 -10    1.17    0.09
  -4   4  10    1.19    0.09
  -4   4  10    1.27    0.10
  -3  -4  10    2.55    0.16
  -3  -4  10    2.67    0.14
   3  -4 -10    2.85    0.17
   3  -4 -10    2.82    0.15
   3   4 -10    2.59    0.15
   3   4 -10    2.84    0.14
  -3   4  10    2.93    0.14
  -3   4  10    2.56    0.14
  -2  -4  10    5.30    0.20
   2  -4 -10    5.27    0.24
   2  -4 -10    4.84    0.20
  -2  -4  10    5.01    0.22
  -2  -4  10    5.04    0.20
   2   4 -10    5.38    0.19
  -2   4  10    5.23    0.21
   2   4 -10    5.23    0.21
  -2   4  10    5.09    0.19
  -1  -4  10    0.08    0.04
  -1  -4  10    0.08    0.04
   1  -4 -10    0.05    0.05
  -1  -4  10    0.07    0.04
   1  -4 -10    0.00    0.03
   1   4 -10    0.11    0.03
   1   4 -10    0.03    0.04
  -1   4  10    0.07    0.03
  -1   4  10    0.03    0.04
   0  -4  10    1.72    0.11
   0  -4  10    1.80    0.10
   0  -4 -10    1.70    0.13
   0  -4  10    1.64    0.10
   0  -4 -10    1.77    0.10
   0   4  10    1.77    0.10
   0   4 -10    1.75    0.09
   0   4  10    1.73    0.12
   0   4 -10    1.78    0.11
  -1  -4 -10    3.76    0.15
  -1  -4 -10    3.96    0.20
  -1  -4 -10    3.72    0.15
  -1  -4 -10    3.96    0.16
   1  -4  10    4.03    0.17
   1  -4  10    3.68    0.17
   1  -4  10    3.81    0.13
   1   4  10    3.86    0.18
  -1   4 -10    4.02    0.15
  -1   4 -10    4.09    0.18
   2  -4  10    5.16    0.18
  -2  -4 -10    5.12    0.20
  -2  -4 -10    5.25    0.18
  -2  -4 -10    5.04    0.18
   2   4  10    5.00    0.21
  -2   4 -10    5.32    0.20
  -2   4 -10    5.24    0.21
  -2   4 -10    5.12    0.18
  -3  -4 -10    1.48    0.11
  -3  -4 -10    1.26    0.09
  -3  -4 -10    1.29    0.10
  -3   4 -10    1.42    0.10
  -3   4 -10    1.09    0.09
   3   4  10    1.27    0.11
  -3   4 -10    1.34    0.09
  -3   4 -10    1.49    0.12
  -4  -4 -10    1.32    0.10
   4   4  10    1.42    0.11
  -4   4 -10    1.17    0.09
  -4   4 -10    1.36    0.10
   5  -4  10    0.18    0.04
  -5  -4 -10    0.17    0.05
  -5   4 -10    0.23    0.05
  -5   4 -10    0.23    0.05
   5   4  10    0.17    0.05
  -6  -4 -10    2.84    0.15
   6  -4  10    2.69    0.13
   6   4  10    2.74    0.15
  -6   4 -10    2.86    0.15
  -6   4 -10    3.25    0.17
   7  -4  10    2.29    0.14
  -7   4 -10    2.10    0.15
  -7   4 -10    2.15    0.14
   7   4  10    1.88    0.13
   8  -4  10    0.33    0.07
   8   4  10    0.54    0.08
  -8   4 -10    0.51    0.09
   7  -5 -10    1.90    0.17
  -7  -5  10    1.81    0.15
   7  -5 -10    1.55    0.16
  -7   5  10    1.92    0.15
   7   5 -10    1.95    0.14
   6  -5 -10    0.02    0.05
  -6  -5  10    0.01    0.04
   6  -5 -10   -0.01    0.05
  -6   5  10    0.04    0.05
   6   5 -10    0.08    0.04
   5  -5 -10    1.05    0.14
  -5  -5  10    0.85    0.14
   5  -5 -10    0.86    0.11
  -5  -5  10    0.79    0.11
   5   5 -10    0.87    0.10
  -5   5  10    0.79    0.10
   5   5 -10    0.81    0.11
   4  -5 -10    1.89    0.14
  -4  -5  10    2.08    0.14
  -4  -5  10    2.05    0.17
   4  -5 -10    2.14    0.17
   4   5 -10    1.84    0.14
   4   5 -10    1.97    0.12
  -4   5  10    2.25    0.14
  -4   5  10    2.12    0.14
   3  -5 -10    0.06    0.05
   3  -5 -10    0.09    0.06
  -3  -5  10    0.01    0.05
  -3  -5  10    0.12    0.05
   3   5 -10    0.01    0.04
  -3   5  10    0.11    0.04
  -3   5  10    0.11    0.05
   3   5 -10    0.00    0.03
   2  -5 -10    0.89    0.13
  -2  -5  10    0.78    0.09
  -2  -5  10    0.65    0.10
  -2  -5  10    0.72    0.10
   2  -5 -10    0.69    0.09
  -2   5  10    0.82    0.09
  -2   5  10    0.69    0.09
   2   5 -10    0.71    0.10
  -1  -5  10    5.17    0.22
  -1  -5  10    4.75    0.21
   1  -5 -10    4.89    0.24
  -1  -5  10    4.89    0.22
   1  -5 -10    4.90    0.21
  -1   5  10    4.85    0.19
   1   5 -10    4.80    0.22
  -1   5  10    4.60    0.21
   0  -5 -10    0.44    0.09
   0  -5 -10    0.55    0.08
   0  -5 -10    0.60    0.07
   0  -5 -10    0.39    0.06
   0  -5  10    0.43    0.08
   0  -5  10    0.49    0.07
   0  -5  10    0.35    0.07
   0   5  10    0.38    0.07
   0   5 -10    0.51    0.08
  -1  -5 -10   -0.02    0.03
   1  -5  10    0.09    0.05
  -1  -5 -10    0.10    0.06
  -1  -5 -10    0.03    0.03
   1  -5  10    0.08    0.04
  -1  -5 -10    0.01    0.03
   1  -5  10    0.02    0.04
  -1   5 -10    0.04    0.04
   1   5  10    0.01    0.04
  -2  -5 -10    0.85    0.09
  -2  -5 -10    0.85    0.09
  -2  -5 -10    0.79    0.08
   2   5  10    0.81    0.11
  -2   5 -10    0.94    0.10
  -2   5 -10    0.86    0.10
  -3  -5 -10    3.26    0.16
   3  -5  10    3.24    0.12
   3   5  10    3.22    0.18
  -3   5 -10    3.60    0.17
  -3   5 -10    3.41    0.17
   4  -5  10    1.26    0.07
  -4  -5 -10    1.38    0.10
   4  -5  10    1.50    0.11
  -4   5 -10    1.23    0.12
   4   5  10    1.33    0.14
   5  -5  10    6.00    0.25
   5  -5  10    5.76    0.20
   5   5  10    5.74    0.25
  -5   5 -10    6.16    0.25
   6  -5  10    0.31    0.07
   6  -5  10    0.32    0.06
  -6   5 -10    0.46    0.08
   7  -5  10    0.40    0.08
   7  -5  10    0.47    0.08
  -7   5 -10    0.55    0.08
  -6  -6  10    1.69    0.19
   6  -6 -10    1.55    0.20
   6  -6 -10    1.48    0.18
  -6   6  10    1.51    0.15
  -5  -6  10    0.09    0.06
   5  -6 -10    0.00    0.05
  -5  -6  10   -0.10    0.04
   5  -6 -10   -0.11    0.04
   5   6 -10    0.01    0.04
  -5   6  10    0.04    0.04
  -4  -6  10    3.69    0.24
   4  -6 -10    3.61    0.20
   4  -6 -10    3.59    0.23
  -4  -6  10    3.45    0.20
  -4   6  10    3.76    0.20
   4   6 -10    3.67    0.21
   3  -6 -10    0.84    0.11
  -3  -6  10    1.09    0.13
   3  -6 -10    0.97    0.14
  -3  -6  10    0.85    0.12
  -3  -6  10    0.78    0.13
  -3   6  10    0.81    0.11
  -3   6  10    0.76    0.10
   3   6 -10    0.95    0.12
  -2  -6  10    0.74    0.11
   2  -6 -10    0.64    0.09
  -2  -6  10    0.73    0.12
   2  -6 -10    0.59    0.11
  -2  -6  10    0.78    0.10
  -2   6  10    0.62    0.10
   2   6 -10    0.85    0.12
  -2   6  10    0.71    0.09
  -1  -6  10    0.36    0.08
   1  -6 -10    0.27    0.07
  -1  -6  10    0.30    0.08
   1  -6 -10    0.52    0.10
  -1  -6  10    0.35    0.08
  -1   6  10    0.43    0.07
  -1   6  10    0.43    0.08
   1   6 -10    0.33    0.08
   0  -6  10   -0.03    0.04
   0  -6 -10   -0.02    0.04
   0  -6 -10   -0.09    0.03
   0  -6  10    0.06    0.05
   0  -6 -10    0.01    0.03
   0  -6 -10   -0.02    0.03
   0  -6  10    0.07    0.05
   0   6 -10    0.03    0.05
   0   6  10    0.03    0.04
   1  -6  10    0.18    0.06
  -1  -6 -10    0.28    0.06
   1  -6  10    0.20    0.07
  -1  -6 -10    0.30    0.06
   1  -6  10    0.32    0.07
  -1  -6 -10    0.22    0.06
   1   6  10    0.23    0.07
  -1   6 -10    0.15    0.06
  -2  -6 -10    0.02    0.03
   2  -6  10    0.04    0.04
   2  -6  10    0.03    0.05
   2  -6  10    0.01    0.05
  -2   6 -10    0.04    0.04
   2   6  10    0.05    0.05
   3  -6  10    0.59    0.07
   3   6  10    0.43    0.09
  -3   6 -10    0.50    0.08
  -3   6 -10    0.44    0.08
   4  -6  10    2.85    0.14
   4   6  10    3.11    0.19
  -4   6 -10    2.88    0.17
   5  -6  10    1.25    0.10
  -5   6 -10    1.40    0.14
   5   6  10    1.38    0.15
   6  -6  10    2.58    0.17
   6  -6  10    2.59    0.14
  -6   6 -10    2.75    0.17
  -3  -7  10    0.36    0.09
   3  -7 -10    0.39    0.08
  -3  -7  10    0.39    0.10
   3  -7 -10    0.53    0.11
  -3   7  10    0.28    0.07
  -3   7  10    0.28    0.07
   3   7 -10    0.43    0.09
  -2  -7  10    0.75    0.12
  -2  -7  10    1.15    0.15
  -2  -7  10    0.78    0.11
   2  -7 -10    0.99    0.12
   2  -7 -10    1.00    0.15
   2   7 -10    1.00    0.14
  -2   7  10    0.69    0.11
  -2   7  10    0.71    0.10
   1  -7 -10    2.98    0.21
  -1  -7  10    2.76    0.19
   1  -7 -10    3.06    0.18
  -1  -7  10    2.64    0.19
   1  -7 -10    2.80    0.17
  -1  -7  10    3.14    0.20
   1  -7 -10    2.79    0.17
  -1   7  10    3.19    0.20
   1   7 -10    2.87    0.19
   0  -7 -10    0.88    0.11
   0  -7  10    0.65    0.11
   0  -7 -10    0.80    0.10
   0  -7  10    1.05    0.14
   0  -7  10    0.57    0.10
   0  -7 -10    0.95    0.11
   0   7  10    0.91    0.13
   0   7 -10    0.94    0.12
   1  -7  10    0.05    0.06
   1  -7  10    0.12    0.06
   1  -7  10    0.20    0.08
   1   7  10    0.24    0.07
  -1   7 -10    0.06    0.05
   2  -7  10    3.38    0.20
   2  -7  10    3.10    0.18
   2  -7  10    3.24    0.20
   2   7  10    3.14    0.21
  -2   7 -10    3.17    0.19
   3  -7  10    2.36    0.15
   3  -7  10    2.61    0.19
   3  -7  10    2.90    0.19
   3   7  10    2.49    0.19
  10   0 -11    0.04    0.05
 -10   0  11    0.01    0.05
   9   0 -11    0.02    0.04
  -9   0  11    0.00    0.04
  -8   0  11    0.02    0.05
   8   0 -11    0.04    0.04
  -7   0  11    0.06    0.04
   7   0 -11    0.03    0.04
  -6   0  11   -0.03    0.03
   6   0 -11   -0.03    0.03
  -5   0  11    0.02    0.02
  -5   0  11    0.03    0.03
   5   0 -11   -0.03    0.02
   5   0 -11   -0.02    0.02
  -4   0  11   -0.02    0.02
  -4   0  11   -0.02    0.02
   4   0 -11    0.00    0.02
  -4   0  11   -0.03    0.03
   4   0 -11    0.03    0.03
   3   0 -11   -0.02    0.01
  -3   0  11   -0.01    0.02
   3   0 -11    0.08    0.03
   3   0 -11    0.01    0.02
  -3   0  11   -0.01    0.03
  -3   0  11   -0.01    0.02
   2   0 -11    0.04    0.02
   2   0 -11    0.00    0.02
  -2   0  11   -0.02    0.03
  -2   0  11    0.02    0.02
  -2   0  11   -0.01    0.02
  -1   0  11    0.01    0.03
  -1   0  11    0.02    0.01
   1   0 -11    0.02    0.02
   1   0 -11    0.01    0.01
  -1   0  11    0.01    0.02
   0   0  11    0.00    0.03
   0   0  11   -0.01    0.02
   0   0 -11    0.01    0.02
   0   0 -11    0.03    0.02
  -1   0 -11    0.03    0.02
  -1   0 -11   -0.01    0.02
   1   0  11    0.03    0.02
   1   0  11    0.03    0.03
   2   0  11    0.00    0.02
  -2   0 -11    0.01    0.02
  -2   0 -11   -0.01    0.02
   2   0  11    0.02    0.02
  -3   0 -11   -0.02    0.02
  -3   0 -11   -0.01    0.02
   3   0  11    0.00    0.02
   3   0  11   -0.02    0.03
  -3   0 -11    0.01    0.01
   4   0  11    0.01    0.03
   4   0  11    0.01    0.03
  -4   0 -11    0.02    0.03
   4   0  11   -0.02    0.02
   5   0  11    0.01    0.03
   5   0  11   -0.01    0.03
  -5   0 -11    0.02    0.03
   6   0  11    0.01    0.04
   6   0  11   -0.03    0.04
  -6   0 -11    0.01    0.04
  -7   0 -11   -0.01    0.04
   7   0  11   -0.06    0.04
   7   0  11   -0.04    0.04
  -8   0 -11    0.01    0.05
   8   0  11   -0.06    0.04
   8   0  11   -0.04    0.04
   9   0  11   -0.07    0.05
   9   0  11   -0.03    0.04
  -9   0 -11   -0.02    0.04
  10   1 -11   -0.01    0.04
   9  -1 -11    0.99    0.11
  -9  -1  11    0.67    0.10
   9   1 -11    0.77    0.11
  -9   1  11    0.85    0.12
  -8  -1  11    4.82    0.23
   8  -1 -11    4.99    0.21
  -8   1  11    4.54    0.22
   8   1 -11    4.57    0.22
   7  -1 -11    0.02    0.03
  -7  -1  11    0.07    0.05
   7  -1 -11    0.05    0.03
  -7   1  11    0.06    0.05
   7   1 -11    0.08    0.05
   6  -1 -11    3.21    0.15
   6  -1 -11    3.41    0.15
  -6  -1  11    3.39    0.16
  -6   1  11    3.15    0.16
   6   1 -11    3.51    0.17
   5  -1 -11    0.41    0.06
   5  -1 -11    0.48    0.09
  -5  -1  11    0.47    0.06
   5  -1 -11    0.51    0.06
  -5  -1  11    0.46    0.06
  -5  -1  11    0.72    0.11
   5   1 -11    0.40    0.06
  -5   1  11    0.48    0.07
   4  -1 -11    5.10    0.18
  -4  -1  11    5.14    0.22
   4  -1 -11    4.89    0.17
  -4  -1  11    4.62    0.18
  -4  -1  11    5.42    0.19
   4   1 -11    4.84    0.18
  -4   1  11    5.37    0.19
  -4   1  11    5.12    0.18
  -3  -1  11   32.27    0.78
  -3  -1  11   30.36    0.83
  -3  -1  11   28.16    0.79
   3  -1 -11   32.28    0.83
   3  -1 -11   29.66    0.77
   3  -1 -11   32.01    0.78
  -3   1  11   32.13    0.78
  -3   1  11   31.02    0.79
  -3   1  11   32.43    0.83
   3   1 -11   31.24    0.79
  -2  -1  11    2.17    0.09
  -2  -1  11    2.10    0.10
   2  -1 -11    2.13    0.09
  -2  -1  11    2.29    0.12
   2  -1 -11    2.12    0.12
   2  -1 -11    2.09    0.09
   2   1 -11    2.29    0.07
  -2   1  11    2.18    0.10
  -2   1  11    2.16    0.09
   2   1 -11    1.96    0.10
  -2   1  11    2.26    0.12
   1  -1 -11   79.90    1.88
   1  -1 -11   77.36    1.89
  -1  -1  11   81.13    1.88
   1  -1 -11   82.57    1.93
  -1  -1  11   78.57    1.91
  -1  -1  11   78.42    1.91
   1   1 -11   78.86    1.90
  -1   1  11   75.34    1.90
  -1   1  11   80.77    1.93
  -1   1  11   81.47    1.87
   1   1 -11   82.17    1.86
   0  -1 -11    4.46    0.14
   0  -1  11    4.47    0.16
   0  -1  11    4.57    0.13
   0  -1 -11    4.31    0.15
   0  -1  11    4.30    0.16
   0  -1  11    4.47    0.13
   0   1 -11    4.35    0.13
   0   1  11    4.66    0.17
   0   1 -11    4.46    0.15
  -1  -1 -11    4.65    0.15
  -1  -1 -11    4.57    0.15
   1  -1  11    4.56    0.15
   1  -1  11    4.67    0.13
   1  -1  11    4.76    0.14
   1  -1  11    4.55    0.13
   1  -1  11    4.55    0.16
  -1   1 -11    4.42    0.15
   1   1  11    4.43    0.16
   1   1  11    4.30    0.17
  -1   1 -11    4.61    0.14
  -2  -1 -11    7.68    0.23
   2  -1  11    7.72    0.21
   2  -1  11    7.46    0.23
  -2  -1 -11    7.42    0.23
   2  -1  11    7.50    0.21
  -2   1 -11    7.97    0.20
  -2   1 -11    7.61    0.22
   2   1  11    7.67    0.24
  -2   1 -11    7.24    0.23
   2   1  11    7.82    0.26
   3  -1  11   13.39    0.35
   3  -1  11   12.80    0.35
  -3  -1 -11   12.70    0.36
   3  -1  11   12.06    0.34
  -3   1 -11   12.60    0.36
   3   1  11   12.58    0.36
  -3   1 -11   12.30    0.35
   3   1  11   12.78    0.38
  -3   1 -11   12.71    0.33
   3   1  11   12.45    0.36
  -4  -1 -11    0.01    0.03
   4  -1  11    0.00    0.03
   4  -1  11    0.00    0.03
   4  -1  11    0.07    0.02
  -4   1 -11    0.04    0.02
   4   1  11    0.02    0.04
  -4   1 -11    0.02    0.03
   4   1  11    0.00    0.02
   4   1  11    0.01    0.03
  -5  -1 -11    3.01    0.14
   5  -1  11    3.00    0.14
   5  -1  11    3.09    0.15
   5   1  11    3.21    0.15
  -5   1 -11    3.55    0.14
   5   1  11    3.05    0.17
  -5   1 -11    3.07    0.14
   6  -1  11    0.67    0.08
  -6  -1 -11    0.78    0.09
   6  -1  11    0.73    0.09
   6   1  11    0.52    0.09
  -6   1 -11    0.52    0.07
   6   1  11    0.78    0.09
  -7  -1 -11    1.12    0.11
   7  -1  11    1.27    0.13
   7  -1  11    1.39    0.12
   7   1  11    1.10    0.12
  -7   1 -11    1.31    0.11
   7   1  11    0.98    0.13
  -8  -1 -11    2.36    0.15
   8  -1  11    2.55    0.16
   8  -1  11    2.61    0.17
   8   1  11    2.50    0.16
   8   1  11    2.71    0.19
  -8   1 -11    2.18    0.15
   9  -1  11    3.03    0.21
  -9  -1 -11    3.15    0.18
   9  -1  11    3.38    0.19
   9   1  11    3.57    0.23
  -9   1 -11    2.86    0.18
   9   1  11    3.53    0.20
  -9  -2  11    0.50    0.09
  -9   2  11    0.29    0.07
   9   2 -11    0.29    0.07
  -8  -2  11    0.12    0.06
   8  -2 -11    0.05    0.04
   8   2 -11   -0.01    0.04
  -8   2  11    0.05    0.05
   7  -2 -11    1.16    0.10
   7  -2 -11    1.44    0.16
  -7  -2  11    1.17    0.12
  -7   2  11    1.03    0.11
   7   2 -11    1.30    0.13
   6  -2 -11    4.83    0.25
   6  -2 -11    4.58    0.19
  -6  -2  11    4.75    0.21
  -6   2  11    4.87    0.21
   6   2 -11    4.59    0.20
  -5  -2  11    4.07    0.18
  -5  -2  11    4.11    0.22
   5  -2 -11    4.18    0.16
   5  -2 -11    4.16    0.22
   5  -2 -11    3.95    0.17
   5   2 -11    4.12    0.18
   5   2 -11    4.36    0.17
  -5   2  11    3.98    0.17
  -4  -2  11    0.50    0.09
   4  -2 -11    0.42    0.06
   4  -2 -11    0.45    0.08
  -4  -2  11    0.53    0.07
   4  -2 -11    0.50    0.05
   4   2 -11    0.54    0.07
  -4   2  11    0.52    0.06
   4   2 -11    0.55    0.07
  -4   2  11    0.46    0.06
   3  -2 -11    7.53    0.21
  -3  -2  11    7.43    0.27
  -3  -2  11    7.16    0.23
   3  -2 -11    7.43    0.27
   3  -2 -11    7.13    0.23
   3   2 -11    7.07    0.24
   3   2 -11    7.50    0.25
  -3   2  11    7.14    0.23
  -3   2  11    6.94    0.23
   2  -2 -11    0.47    0.07
   2  -2 -11    0.70    0.04
  -2  -2  11    0.54    0.07
   2  -2 -11    0.63    0.06
  -2  -2  11    0.58    0.06
   2   2 -11    0.64    0.07
  -2   2  11    0.55    0.06
  -2   2  11    0.49    0.05
   2   2 -11    0.60    0.06
  -2   2  11    0.67    0.08
   1  -2 -11    0.34    0.03
   1  -2 -11    0.42    0.06
  -1  -2  11    0.35    0.04
  -1  -2  11    0.40    0.05
  -1  -2  11    0.31    0.04
   1  -2 -11    0.33    0.05
  -1   2  11    0.34    0.04
   1   2 -11    0.29    0.04
   1   2 -11    0.34    0.05
  -1   2  11    0.24    0.05
  -1   2  11    0.37    0.06
   0  -2  11   11.91    0.33
   0  -2  11   12.17    0.33
   0  -2 -11   12.82    0.32
   0  -2 -11   11.99    0.34
   0  -2  11   12.04    0.33
   0  -2  11   12.76    0.33
   0  -2 -11   12.75    0.38
   0   2 -11   11.67    0.35
   0   2  11   12.22    0.31
   0   2 -11   11.94    0.34
   0   2 -11   13.01    0.31
   0   2  11   12.04    0.37
   0   2  11   12.22    0.36
  -1  -2 -11   20.67    0.49
   1  -2  11   20.06    0.51
   1  -2  11   19.61    0.51
  -1  -2 -11   19.93    0.53
   1  -2  11   19.79    0.49
   1  -2  11   20.39    0.49
  -1  -2 -11   20.53    0.56
  -1  -2 -11   20.34    0.51
  -1  -2 -11   20.73    0.49
   1   2  11   20.17    0.56
  -1   2 -11   19.46    0.53
  -1   2 -11   19.78    0.52
   1   2  11   19.50    0.54
  -1   2 -11   19.73    0.50
  -2  -2 -11    9.22    0.28
  -2  -2 -11    9.35    0.24
   2   2  11    9.21    0.31
  -2   2 -11    9.21    0.26
  -2   2 -11    9.07    0.27
   2   2  11    9.49    0.27
  -2   2 -11    9.32    0.28
  -2   2 -11    9.04    0.26
   2   2  11    8.96    0.28
   3  -2  11   17.40    0.47
  -3  -2 -11   17.45    0.48
  -3   2 -11   17.79    0.47
   3   2  11   17.35    0.47
   3   2  11   17.27    0.48
  -3   2 -11   18.02    0.46
  -3   2 -11   16.85    0.47
   3   2  11   17.85    0.52
  -4  -2 -11    5.52    0.21
   4  -2  11    5.61    0.20
   4  -2  11    5.64    0.17
   4   2  11    5.97    0.21
   4   2  11    6.14    0.25
  -4   2 -11    5.98    0.19
   4   2  11    5.86    0.20
  -4   2 -11    5.68    0.21
   5  -2  11    4.65    0.19
   5  -2  11    4.68    0.17
  -5  -2 -11    4.32    0.18
  -5   2 -11    4.97    0.17
   5   2  11    4.66    0.19
   5   2  11    4.67    0.23
  -5   2 -11    4.63    0.19
   6  -2  11    0.78    0.09
  -6  -2 -11    0.79    0.09
   6  -2  11    0.68    0.08
   6   2  11    0.89    0.12
  -6   2 -11    0.84    0.09
   6   2  11    0.77    0.09
   7  -2  11    1.98    0.13
   7  -2  11    1.75    0.12
  -7  -2 -11    1.87    0.12
   7   2  11    1.99    0.14
  -7   2 -11    1.97    0.14
   7   2  11    2.10    0.17
   8  -2  11    1.42    0.14
  -8  -2 -11    1.25    0.12
   8  -2  11    1.51    0.12
   8   2  11    1.81    0.23
   8   2  11    1.56    0.15
  -8   2 -11    1.14    0.13
   9  -2  11    1.89    0.14
  -9  -2 -11    1.80    0.14
   9  -2  11    2.17    0.17
  -9   2 -11    2.31    0.16
   9   2  11    2.22    0.16
  -9  -3  11    0.34    0.08
   9  -3 -11    0.30    0.07
   9   3 -11    0.11    0.05
  -9   3  11    0.20    0.07
   8  -3 -11    0.20    0.09
  -8  -3  11    0.07    0.05
   8  -3 -11    0.12    0.05
  -8   3  11    0.20    0.06
   8   3 -11    0.05    0.05
  -7  -3  11    0.04    0.05
   7  -3 -11    0.02    0.04
   7  -3 -11    0.03    0.05
  -7   3  11    0.05    0.05
   7   3 -11    0.08    0.05
  -6  -3  11    3.49    0.18
   6  -3 -11    4.17    0.23
   6  -3 -11    3.73    0.18
  -6   3  11    3.56    0.18
   6   3 -11    3.85    0.19
  -5  -3  11    0.69    0.11
   5  -3 -11    0.68    0.09
  -5  -3  11    0.53    0.08
   5  -3 -11    0.65    0.11
   5   3 -11    0.68    0.08
   5   3 -11    0.56    0.08
  -5   3  11    0.59    0.08
  -4  -3  11    0.62    0.09
   4  -3 -11    0.33    0.08
   4  -3 -11    0.53    0.07
  -4  -3  11    0.59    0.08
  -4   3  11    0.50    0.07
   4   3 -11    0.52    0.07
   4   3 -11    0.53    0.07
  -4   3  11    0.66    0.07
   3  -3 -11   10.25    0.37
  -3  -3  11   10.59    0.32
  -3  -3  11   10.41    0.36
   3  -3 -11   10.35    0.33
   3   3 -11   10.74    0.34
   3   3 -11   10.43    0.32
  -3   3  11   10.50    0.33
  -3   3  11   10.23    0.31
  -2  -3  11    0.03    0.03
  -2  -3  11    0.09    0.03
   2  -3 -11    0.07    0.04
   2  -3 -11   -0.01    0.03
  -2  -3  11    0.02    0.04
  -2   3  11    0.05    0.04
  -2   3  11    0.03    0.03
   2   3 -11    0.02    0.03
   2   3 -11    0.06    0.03
  -1  -3  11    5.17    0.19
  -1  -3  11    4.94    0.18
  -1  -3  11    5.45    0.19
   1  -3 -11    5.33    0.19
   1  -3 -11    5.26    0.22
  -1   3  11    5.21    0.17
  -1   3  11    5.24    0.20
   1   3 -11    5.22    0.20
   1   3 -11    5.38    0.19
   0  -3  11    0.13    0.04
   0  -3 -11    0.17    0.04
   0  -3  11    0.13    0.03
   0  -3  11    0.17    0.04
   0  -3 -11    0.06    0.04
   0   3 -11    0.13    0.04
   0   3  11    0.17    0.05
   0   3 -11    0.17    0.04
   0   3  11    0.27    0.04
  -1  -3 -11    5.38    0.17
  -1  -3 -11    5.67    0.17
  -1  -3 -11    5.64    0.20
   1  -3  11    5.14    0.15
   1  -3  11    5.35    0.19
   1  -3  11    5.22    0.19
   1  -3  11    5.47    0.15
  -1  -3 -11    5.55    0.23
   1   3  11    5.40    0.21
  -1   3 -11    5.56    0.17
   1   3  11    5.35    0.18
  -1   3 -11    5.31    0.19
  -1   3 -11    5.60    0.21
  -2  -3 -11    1.15    0.06
  -2  -3 -11    1.09    0.08
  -2  -3 -11    1.21    0.07
   2   3  11    1.12    0.09
  -2   3 -11    1.21    0.08
  -2   3 -11    1.20    0.09
   2   3  11    1.41    0.14
  -2   3 -11    1.26    0.08
   2   3  11    1.12    0.07
  -2   3 -11    1.13    0.09
  -3  -3 -11    8.87    0.28
  -3   3 -11    8.74    0.27
  -3   3 -11    8.71    0.28
   3   3  11    8.72    0.29
   3   3  11    8.96    0.35
   3   3  11    8.90    0.27
  -3   3 -11    9.13    0.27
  -3   3 -11    8.82    0.27
   4  -3  11    0.28    0.05
  -4  -3 -11    0.30    0.06
   4   3  11    0.24    0.05
  -4   3 -11    0.31    0.05
  -4   3 -11    0.29    0.05
  -4   3 -11    0.31    0.05
   4   3  11    0.23    0.05
   5  -3  11    0.48    0.07
  -5  -3 -11    0.59    0.08
   5  -3  11    0.56    0.05
  -5   3 -11    0.53    0.07
  -5   3 -11    0.70    0.08
   5   3  11    0.49    0.08
   5   3  11    0.52    0.07
  -6  -3 -11    0.28    0.06
   6  -3  11    0.31    0.05
   6  -3  11    0.41    0.07
  -6   3 -11    0.46    0.08
   6   3  11    0.36    0.07
  -6   3 -11    0.38    0.06
   7  -3  11    0.03    0.04
   7  -3  11   -0.01    0.03
  -7  -3 -11   -0.03    0.03
   7   3  11    0.01    0.04
  -7   3 -11   -0.03    0.04
   8  -3  11    0.70    0.10
  -8  -3 -11    0.72    0.10
   8  -3  11    0.79    0.12
  -8   3 -11    0.65    0.10
   8   3  11    0.69    0.10
   9  -3  11    0.37    0.10
  -9   3 -11    0.38    0.10
   9   3  11    0.47    0.09
   8  -4 -11    0.19    0.07
  -8  -4  11    0.23    0.07
   8  -4 -11    0.19    0.06
  -8   4  11    0.15    0.06
   8   4 -11    0.21    0.07
   7  -4 -11    0.46    0.10
  -7  -4  11    0.39    0.08
   7  -4 -11    0.63    0.10
  -7   4  11    0.36    0.08
   7   4 -11    0.49    0.09
   6  -4 -11    3.25    0.18
  -6  -4  11    2.81    0.17
   6  -4 -11    3.08    0.21
  -6   4  11    3.00    0.17
   6   4 -11    2.86    0.16
  -5  -4  11    5.88    0.25
  -5  -4  11    5.71    0.28
   5  -4 -11    6.12    0.25
   5  -4 -11    5.56    0.28
   5   4 -11    5.76    0.23
  -5   4  11    5.82    0.24
   5   4 -11    5.85    0.25
  -4  -4  11    9.80    0.38
   4  -4 -11    9.81    0.34
  -4  -4  11    9.70    0.34
   4  -4 -11   10.94    0.39
  -4   4  11    9.56    0.32
   4   4 -11    9.55    0.34
  -4   4  11    9.92    0.32
   4   4 -11    9.83    0.33
  -3  -4  11    1.65    0.11
   3  -4 -11    1.56    0.14
  -3  -4  11    1.52    0.13
   3  -4 -11    1.56    0.11
  -3   4  11    1.57    0.10
   3   4 -11    1.77    0.11
   3   4 -11    1.64    0.12
  -3   4  11    1.45    0.11
  -2  -4  11    0.59    0.08
  -2  -4  11    0.56    0.07
  -2  -4  11    0.51    0.08
   2  -4 -11    0.64    0.10
   2  -4 -11    0.55    0.07
  -2   4  11    0.47    0.06
   2   4 -11    0.56    0.07
   2   4 -11    0.44    0.07
  -2   4  11    0.43    0.07
  -1  -4  11    0.33    0.06
  -1  -4  11    0.23    0.05
   1  -4 -11    0.31    0.07
   1  -4 -11    0.23    0.05
  -1  -4  11    0.35    0.06
  -1   4  11    0.26    0.06
  -1   4  11    0.26    0.05
   1   4 -11    0.28    0.05
   1   4 -11    0.38    0.07
   0  -4  11    0.03    0.03
   0  -4  11    0.01    0.03
   0  -4 -11    0.05    0.04
   0  -4 -11    0.00    0.03
   0  -4  11   -0.05    0.03
   0   4  11    0.02    0.04
   0   4 -11    0.04    0.04
   0   4  11   -0.06    0.02
   0   4 -11    0.02    0.03
  -1  -4 -11    1.55    0.10
  -1  -4 -11    1.53    0.13
  -1  -4 -11    1.54    0.09
  -1  -4 -11    1.46    0.09
   1  -4  11    1.58    0.08
   1  -4  11    1.63    0.11
   1  -4  11    1.42    0.10
  -1   4 -11    1.63    0.11
  -1   4 -11    1.51    0.09
   1   4  11    1.50    0.11
  -2  -4 -11   12.59    0.39
  -2   4 -11   13.12    0.37
  -2   4 -11   13.09    0.37
  -2   4 -11   13.35    0.40
  -2   4 -11   13.38    0.39
   2   4  11   12.60    0.41
  -3  -4 -11    2.55    0.13
  -3   4 -11    2.32    0.11
  -3   4 -11    2.25    0.12
   3   4  11    2.43    0.14
  -3   4 -11    2.41    0.13
  -3   4 -11    2.46    0.13
  -4  -4 -11    5.66    0.22
  -4   4 -11    6.03    0.22
   4   4  11    5.49    0.23
  -4   4 -11    5.91    0.22
   5  -4  11    0.97    0.06
  -5  -4 -11    1.02    0.10
   5   4  11    1.02    0.11
  -5   4 -11    0.93    0.10
  -5   4 -11    1.04    0.10
   6  -4  11    0.37    0.06
  -6  -4 -11    0.35    0.07
   6   4  11    0.23    0.07
  -6   4 -11    0.29    0.07
  -6   4 -11    0.25    0.05
   7  -4  11    0.07    0.04
   7   4  11    0.16    0.05
  -7   4 -11    0.06    0.05
   8  -4  11    0.20    0.06
   8   4  11    0.05    0.04
  -8   4 -11    0.15    0.06
  -7  -5  11    0.05    0.05
   7  -5 -11    0.05    0.05
   7  -5 -11    0.10    0.06
   7   5 -11    0.08    0.04
  -7   5  11    0.00    0.04
   6  -5 -11    0.09    0.07
  -6  -5  11    0.08    0.06
   6  -5 -11    0.03    0.05
   6   5 -11    0.15    0.05
  -6   5  11    0.09    0.05
   5  -5 -11    0.59    0.11
  -5  -5  11    0.59    0.10
  -5  -5  11    0.45    0.10
   5  -5 -11    0.57    0.09
   5   5 -11    0.52    0.08
   5   5 -11    0.54    0.09
  -5   5  11    0.49    0.08
   4  -5 -11    8.10    0.35
  -4  -5  11    7.84    0.34
   4  -5 -11    7.25    0.29
  -4  -5  11    7.34    0.30
   4   5 -11    7.57    0.30
  -4   5  11    7.58    0.28
  -4   5  11    7.77    0.29
   4   5 -11    7.95    0.28
   3  -5 -11    2.00    0.14
   3  -5 -11    1.74    0.15
  -3  -5  11    1.83    0.13
  -3  -5  11    2.09    0.16
   3   5 -11    2.09    0.15
  -3   5  11    1.90    0.12
   3   5 -11    2.14    0.12
  -3   5  11    1.75    0.13
  -2  -5  11    6.37    0.25
  -2  -5  11    6.50    0.26
  -2  -5  11    6.01    0.26
   2  -5 -11    6.90    0.30
   2  -5 -11    6.22    0.25
  -2   5  11    6.09    0.23
  -2   5  11    6.30    0.26
   2   5 -11    6.39    0.27
  -1  -5  11    0.15    0.05
   1  -5 -11    0.16    0.07
   1  -5 -11    0.11    0.05
  -1  -5  11    0.10    0.05
  -1  -5  11    0.12    0.05
  -1   5  11    0.13    0.05
   1   5 -11    0.17    0.06
  -1   5  11    0.20    0.05
   0  -5 -11    6.93    0.25
   0  -5 -11    6.72    0.26
   0  -5 -11    6.98    0.25
   0  -5  11    6.93    0.27
   0  -5 -11    6.86    0.30
   0  -5  11    7.17    0.25
   0  -5  11    6.69    0.26
   0   5 -11    7.07    0.28
   0   5  11    7.04    0.28
  -1  -5 -11    6.00    0.22
   1  -5  11    5.52    0.23
   1  -5  11    5.31    0.23
  -1  -5 -11    5.99    0.22
  -1  -5 -11    5.55    0.23
   1  -5  11    5.55    0.20
  -1   5 -11    5.97    0.25
   1   5  11    5.69    0.25
  -2  -5 -11    2.51    0.14
   2  -5  11    2.54    0.15
   2  -5  11    2.68    0.15
   2  -5  11    2.68    0.11
  -2   5 -11    2.32    0.15
   2   5  11    2.63    0.16
   3  -5  11    1.02    0.06
  -3  -5 -11    1.22    0.10
  -3   5 -11    1.17    0.10
  -3   5 -11    1.22    0.10
   3   5  11    1.04    0.12
   4  -5  11    1.10    0.09
  -4  -5 -11    1.32    0.10
   4  -5  11    1.05    0.06
   4   5  11    1.10    0.12
  -4   5 -11    0.93    0.10
   5  -5  11    4.21    0.20
   5  -5  11    4.28    0.15
   5   5  11    4.28    0.21
  -5   5 -11    4.35    0.20
   6  -5  11    0.34    0.08
   6  -5  11    0.29    0.05
  -6   5 -11    0.41    0.07
   7  -5  11    0.33    0.08
   7  -5  11    0.20    0.06
  -7   5 -11    0.18    0.06
  -5  -6  11    2.47    0.20
   5  -6 -11    2.05    0.18
  -5  -6  11    2.19    0.17
   5  -6 -11    2.37    0.17
   5   6 -11    2.47    0.17
  -5   6  11    2.48    0.16
   4  -6 -11    0.14    0.07
   4  -6 -11   -0.01    0.04
  -4  -6  11    0.06    0.06
  -4  -6  11   -0.02    0.04
   4   6 -11   -0.03    0.04
  -4   6  11    0.01    0.04
   3  -6 -11    0.02    0.04
  -3  -6  11    0.09    0.06
  -3  -6  11   -0.05    0.05
   3  -6 -11    0.10    0.06
  -3   6  11    0.00    0.04
  -3   6  11    0.06    0.05
   3   6 -11    0.00    0.04
  -2  -6  11    0.74    0.11
  -2  -6  11    0.73    0.11
   2  -6 -11    0.87    0.11
   2  -6 -11    0.77    0.12
  -2  -6  11    1.06    0.12
  -2   6  11    1.02    0.12
  -2   6  11    0.79    0.10
   2   6 -11    0.83    0.11
  -1  -6  11    0.03    0.05
   1  -6 -11    0.10    0.05
   1  -6 -11    0.02    0.04
  -1  -6  11    0.04    0.05
  -1  -6  11   -0.03    0.04
  -1   6  11    0.06    0.03
  -1   6  11   -0.03    0.05
   1   6 -11    0.02    0.05
   0  -6  11    0.61    0.10
   0  -6 -11    1.18    0.15
   0  -6 -11    0.97    0.10
   0  -6  11    0.66    0.10
   0  -6  11    0.96    0.11
   0  -6 -11    0.98    0.11
   0  -6 -11    0.95    0.10
   0   6  11    1.04    0.13
   0   6 -11    0.82    0.11
  -1  -6 -11    2.41    0.15
   1  -6  11    2.55    0.16
   1  -6  11    2.42    0.14
   1  -6  11    2.51    0.16
  -1   6 -11    2.62    0.16
   1   6  11    2.44    0.17
  -2  -6 -11    0.19    0.06
   2  -6  11    0.26    0.07
   2  -6  11    0.09    0.06
   2  -6  11    0.19    0.05
  -2   6 -11    0.11    0.05
   2   6  11    0.16    0.07
  -3  -6 -11    0.30    0.07
  -3   6 -11    0.35    0.07
  -3   6 -11    0.28    0.06
   3   6  11    0.37    0.08
   4  -6  11    0.27    0.05
   4   6  11    0.22    0.07
  -4   6 -11    0.18    0.06
   5  -6  11    0.35    0.06
  -5   6 -11    0.43    0.08
   5   6  11    0.32    0.07
  -3  -7  11    0.16    0.07
  -3  -7  11    0.15    0.07
   3  -7 -11    0.03    0.05
   3  -7 -11    0.20    0.07
  -3   7  11    0.29    0.07
   3   7 -11    0.17    0.07
  -3   7  11    0.25    0.07
   2  -7 -11    1.66    0.19
  -2  -7  11    1.87    0.16
   2  -7 -11    1.58    0.15
  -2  -7  11    1.89    0.17
  -2  -7  11    1.64    0.17
  -2   7  11    1.55    0.14
   2   7 -11    1.79    0.16
  -2   7  11    1.74    0.13
  -1  -7  11    0.89    0.12
  -1  -7  11    0.85    0.12
   1  -7 -11    0.73    0.10
   1  -7 -11    0.87    0.11
  -1  -7  11    0.79    0.12
   1  -7 -11    0.75    0.13
   1  -7 -11    0.80    0.11
   1   7 -11    0.81    0.12
  -1   7  11    0.73    0.11
   0  -7  11    0.74    0.11
   0  -7  11    0.54    0.10
   0  -7 -11    0.84    0.11
   0  -7  11    0.75    0.11
   0   7 -11    0.79    0.12
   0   7  11    0.62    0.10
   1  -7  11    0.38    0.09
   1  -7  11    0.34    0.08
   1  -7  11    0.32    0.08
   1   7  11    0.49    0.10
  -1   7 -11    0.42    0.09
   2  -7  11    0.34    0.07
   2  -7  11    0.19    0.07
   2  -7  11    0.43    0.09
   2   7  11    0.37    0.09
  -2   7 -11    0.39    0.08
   3  -7  11    0.17    0.06
   3  -7  11    0.19    0.07
   3  -7  11    0.12    0.08
   3   7  11    0.30    0.08
   9   0 -12    2.59    0.16
  -9   0  12    2.54    0.17
   8   0 -12    1.82    0.13
  -8   0  12    1.78    0.14
  -7   0  12    1.12    0.11
   7   0 -12    1.08    0.11
  -6   0  12    0.65    0.08
   6   0 -12    0.60    0.08
  -5   0  12    0.03    0.03
   5   0 -12    0.00    0.03
   5   0 -12    0.03    0.03
  -5   0  12    0.05    0.03
   4   0 -12   -0.01    0.02
  -4   0  12    0.03    0.03
  -4   0  12   -0.02    0.03
   4   0 -12    0.01    0.02
  -4   0  12    0.04    0.03
   3   0 -12   19.89    0.51
  -3   0  12   19.65    0.53
   3   0 -12   19.40    0.53
  -3   0  12   21.11    0.58
  -3   0  12   20.29    0.52
   2   0 -12  153.84    3.52
  -2   0  12  148.59    3.58
  -2   0  12  153.82    3.52
  -2   0  12  144.16    3.55
   2   0 -12  152.67    3.54
  -1   0  12   29.83    0.78
  -1   0  12   31.44    0.72
  -1   0  12   29.15    0.76
   1   0 -12   29.82    0.75
   1   0 -12   29.43    0.73
   0   0  12  207.41    4.92
   0   0 -12  210.80    4.90
   0   0  12  208.19    4.92
   0   0 -12  214.18    4.89
   1   0  12    1.81    0.10
  -1   0 -12    1.85    0.08
  -1   0 -12    1.70    0.08
   2   0  12    0.48    0.05
  -2   0 -12    0.35    0.04
  -2   0 -12    0.47    0.05
   2   0  12    0.33    0.05
  -3   0 -12   36.06    0.90
  -3   0 -12   36.13    0.90
   3   0  12   35.47    0.90
   3   0  12   35.52    0.89
   4   0  12    1.07    0.07
   4   0  12    1.05    0.08
   4   0  12    1.06    0.09
  -4   0 -12    1.07    0.08
   5   0  12    1.19    0.11
  -5   0 -12    0.95    0.09
   5   0  12    1.14    0.09
   6   0  12   21.16    0.60
   6   0  12   22.09    0.63
  -6   0 -12   21.17    0.60
   7   0  12   12.44    0.42
  -7   0 -12   12.81    0.41
   7   0  12   13.74    0.45
  -8   0 -12    5.16    0.23
   8   0  12    5.95    0.28
   8   0  12    5.29    0.24
  -9   0 -12    0.04    0.05
   9   0  12    0.00    0.06
   9   0  12   -0.03    0.05
  -9  -1  12    2.41    0.17
   9  -1 -12    2.41    0.15
  -9   1  12    2.28    0.16
   9   1 -12    2.68    0.17
   8  -1 -12    2.63    0.15
  -8  -1  12    2.69    0.17
   8   1 -12    2.76    0.17
  -8   1  12    2.71    0.16
   7  -1 -12    0.03    0.04
  -7  -1  12    0.10    0.05
   7  -1 -12    0.07    0.04
   7   1 -12   -0.02    0.04
  -7   1  12    0.06    0.05
  -6  -1  12    2.90    0.15
   6  -1 -12    3.22    0.14
   6  -1 -12    2.85    0.14
   6   1 -12    2.82    0.15
  -6   1  12    2.91    0.15
  -5  -1  12    0.24    0.05
   5  -1 -12    0.18    0.04
  -5  -1  12    0.21    0.05
   5  -1 -12    0.18    0.04
  -5  -1  12    0.29    0.07
   5   1 -12    0.25    0.06
  -5   1  12    0.19    0.05
  -4  -1  12    0.02    0.05
  -4  -1  12    0.07    0.03
   4  -1 -12    0.04    0.03
  -4  -1  12    0.06    0.03
   4  -1 -12    0.05    0.03
   4  -1 -12    0.01    0.04
  -4   1  12    0.05    0.03
  -4   1  12    0.12    0.08
   4   1 -12    0.04    0.03
  -3  -1  12    3.73    0.15
   3  -1 -12    4.05    0.14
   3  -1 -12    3.87    0.18
   3  -1 -12    3.88    0.14
  -3  -1  12    3.99    0.15
  -3  -1  12    3.96    0.18
   3   1 -12    3.75    0.15
  -3   1  12    3.62    0.18
  -3   1  12    3.87    0.14
  -3   1  12    3.89    0.15
  -2  -1  12   72.41    1.75
  -2  -1  12   69.67    1.73
   2  -1 -12   71.22    1.70
  -2  -1  12   73.52    1.70
   2  -1 -12   75.64    1.76
   2  -1 -12   69.30    1.70
   2   1 -12   71.93    1.68
  -2   1  12   71.47    1.69
   2   1 -12   71.51    1.72
  -2   1  12   69.48    1.72
  -2   1  12   70.66    1.75
  -1  -1  12    5.90    0.21
  -1  -1  12    5.93    0.20
  -1  -1  12    6.01    0.17
   1  -1 -12    6.45    0.22
   1  -1 -12    5.87    0.19
   1  -1 -12    5.86    0.18
   1   1 -12    5.74    0.19
  -1   1  12    5.57    0.20
   1   1 -12    5.98    0.16
  -1   1  12    5.96    0.16
  -1   1  12    5.77    0.22
   0  -1  12   12.69    0.32
   0  -1 -12   12.55    0.34
   0  -1 -12   12.88    0.34
   0  -1  12   12.26    0.35
   0  -1  12   12.54    0.36
   0   1 -12   12.46    0.35
   0   1 -12   12.95    0.33
   0   1  12   12.07    0.37
   0   1  12   12.31    0.36
  -1  -1 -12    4.31    0.15
   1  -1  12    4.40    0.13
   1  -1  12    4.43    0.15
   1  -1  12    4.30    0.16
   1  -1  12    4.50    0.13
   1  -1  12    4.52    0.15
  -1  -1 -12    4.42    0.15
   1   1  12    4.29    0.17
  -1   1 -12    4.17    0.15
  -1   1 -12    4.36    0.14
   1   1  12    4.14    0.16
  -2  -1 -12    0.58    0.06
   2  -1  12    0.66    0.05
   2  -1  12    0.71    0.06
   2  -1  12    0.63    0.05
  -2  -1 -12    0.68    0.06
  -2   1 -12    0.54    0.06
  -2   1 -12    0.68    0.04
   2   1  12    0.60    0.06
   2   1  12    0.63    0.07
  -2   1 -12    0.58    0.05
   3  -1  12    0.98    0.07
   3  -1  12    1.04    0.07
  -3  -1 -12    1.09    0.08
  -3   1 -12    1.13    0.05
   3   1  12    0.95    0.07
   3   1  12    1.11    0.09
   3   1  12    1.03    0.07
  -3   1 -12    1.06    0.07
  -3   1 -12    1.12    0.08
   4  -1  12    1.38    0.09
   4  -1  12    1.31    0.09
   4  -1  12    1.44    0.08
  -4  -1 -12    1.35    0.09
   4   1  12    1.40    0.09
  -4   1 -12    1.28    0.09
   4   1  12    1.56    0.09
   4   1  12    1.51    0.12
   5  -1  12    0.45    0.07
   5  -1  12    0.40    0.06
  -5  -1 -12    0.64    0.07
  -5   1 -12    0.43    0.06
   5   1  12    0.57    0.09
   5   1  12    0.39    0.06
   6  -1  12    7.82    0.28
   6  -1  12    7.88    0.29
  -6  -1 -12    7.73    0.28
   6   1  12    7.93    0.32
   6   1  12    8.07    0.29
  -6   1 -12    7.64    0.28
   7  -1  12    1.67    0.13
  -7  -1 -12    1.44    0.11
   7  -1  12    1.65    0.12
  -7   1 -12    1.45    0.12
   7   1  12    1.41    0.16
   7   1  12    1.53    0.12
  -8  -1 -12    1.67    0.13
   8  -1  12    1.54    0.13
   8  -1  12    1.87    0.15
  -8   1 -12    1.88    0.14
   8   1  12    1.92    0.19
   8   1  12    1.64    0.13
   9  -1  12    2.78    0.20
  -9  -1 -12    2.81    0.17
   9  -1  12    2.68    0.17
   9   1  12    2.67    0.18
   9   1  12    2.84    0.21
  -9   1 -12    2.44    0.17
  -9  -2  12    3.31    0.20
  -9   2  12    3.63    0.21
   9   2 -12    4.05    0.22
   8  -2 -12    0.28    0.06
  -8  -2  12    0.26    0.07
   8   2 -12    0.27    0.07
  -8   2  12    0.24    0.07
  -7  -2  12    0.08    0.05
   7  -2 -12   -0.02    0.03
  -7   2  12    0.04    0.04
   7   2 -12    0.03    0.04
   6  -2 -12    0.76    0.09
  -6  -2  12    0.89    0.10
   6  -2 -12    0.77    0.11
   6   2 -12    0.80    0.10
  -6   2  12    0.72    0.09
  -5  -2  12   10.53    0.33
   5  -2 -12   10.14    0.32
  -5  -2  12   10.58    0.39
  -5  -2  12   10.10    0.33
   5  -2 -12   10.75    0.39
   5   2 -12    9.80    0.33
  -5   2  12   10.32    0.33
   4  -2 -12    0.20    0.06
  -4  -2  12    0.14    0.06
   4  -2 -12    0.11    0.03
  -4  -2  12    0.26    0.05
   4  -2 -12    0.08    0.03
   4   2 -12    0.17    0.05
  -4   2  12    0.04    0.03
  -4   2  12    0.10    0.04
   4   2 -12    0.12    0.04
   3  -2 -12    5.78    0.20
  -3  -2  12    5.60    0.20
   3  -2 -12    5.99    0.18
  -3  -2  12    6.08    0.24
   3  -2 -12    5.59    0.24
  -3   2  12    5.76    0.21
  -3   2  12    6.26    0.20
   3   2 -12    5.70    0.21
   3   2 -12    5.77    0.21
   2  -2 -12   17.63    0.49
  -2  -2  12   18.35    0.48
   2  -2 -12   18.35    0.46
   2  -2 -12   18.13    0.53
  -2  -2  12   18.52    0.52
  -2   2  12   17.65    0.47
   2   2 -12   17.94    0.49
  -2   2  12   17.91    0.50
   2   2 -12   18.29    0.50
  -2   2  12   18.59    0.53
   1  -2 -12    6.68    0.22
   1  -2 -12    7.45    0.21
  -1  -2  12    7.12    0.24
  -1  -2  12    7.19    0.22
  -1  -2  12    7.13    0.22
   1  -2 -12    7.02    0.26
  -1   2  12    7.68    0.26
  -1   2  12    7.13    0.24
  -1   2  12    7.31    0.20
   1   2 -12    7.28    0.23
   1   2 -12    7.27    0.24
   0  -2  12    8.72    0.25
   0  -2  12    9.18    0.26
   0  -2 -12    9.11    0.30
   0  -2 -12    8.71    0.27
   0  -2  12    8.67    0.26
   0  -2  12    8.66    0.25
   0  -2 -12    8.95    0.25
   0   2  12    8.80    0.28
   0   2  12    8.65    0.30
   0   2 -12    9.34    0.24
   0   2 -12    8.86    0.27
   0   2 -12    8.39    0.28
   0   2  12    9.43    0.24
   1  -2  12    1.37    0.07
   1  -2  12    1.33    0.07
   1  -2  12    1.42    0.06
  -1  -2 -12    1.27    0.08
  -1  -2 -12    1.35    0.07
   1  -2  12    1.34    0.06
   1   2  12    1.19    0.10
   1   2  12    1.32    0.09
  -1   2 -12    1.29    0.07
  -1   2 -12    1.39    0.08
  -1   2 -12    1.31    0.08
  -2  -2 -12    5.79    0.20
  -2   2 -12    5.86    0.20
  -2   2 -12    5.80    0.18
   2   2  12    6.27    0.24
   2   2  12    5.93    0.21
   2   2  12    5.97    0.19
  -2   2 -12    5.96    0.20
  -2   2 -12    5.76    0.19
  -3  -2 -12    0.59    0.07
   3  -2  12    0.70    0.04
   3  -2  12    0.61    0.07
   3  -2  12    0.72    0.04
  -3   2 -12    0.59    0.05
   3   2  12    0.64    0.07
   3   2  12    0.58    0.06
  -3   2 -12    0.66    0.07
  -3   2 -12    0.72    0.07
   3   2  12    0.62    0.08
   4  -2  12    8.04    0.24
  -4  -2 -12    8.28    0.27
   4   2  12    8.28    0.27
   4   2  12    8.23    0.27
  -4   2 -12    8.42    0.27
  -4   2 -12    8.33    0.25
  -4   2 -12    8.60    0.27
   4   2  12    8.58    0.32
  -5  -2 -12   -0.02    0.03
   5  -2  12    0.00    0.03
   5  -2  12    0.00    0.03
   5   2  12   -0.02    0.05
  -5   2 -12   -0.01    0.03
   5   2  12   -0.05    0.03
   6  -2  12    1.03    0.09
   6  -2  12    0.96    0.10
  -6  -2 -12    1.08    0.10
  -6   2 -12    0.86    0.10
   6   2  12    1.22    0.14
   6   2  12    0.90    0.10
   7  -2  12    0.75    0.10
  -7  -2 -12    0.77    0.09
   7  -2  12    0.72    0.09
   7   2  12    0.81    0.13
  -7   2 -12    0.77    0.10
   7   2  12    0.48    0.08
   8  -2  12    0.12    0.05
   8  -2  12   -0.03    0.04
  -8  -2 -12    0.01    0.04
   8   2  12    0.01    0.05
  -8   2 -12    0.08    0.05
   8   2  12    0.14    0.06
   9  -2  12    3.16    0.18
  -9  -2 -12    2.73    0.17
   9  -2  12    2.69    0.19
   9   2  12    3.25    0.19
  -9   2 -12    2.87    0.18
  -9  -3  12    0.05    0.06
   9  -3 -12    0.00    0.03
   9   3 -12    0.03    0.06
  -9   3  12    0.08    0.06
   8  -3 -12    2.37    0.15
  -8  -3  12    2.63    0.17
  -8   3  12    2.27    0.16
   8   3 -12    2.10    0.16
   7  -3 -12    1.21    0.12
   7  -3 -12    1.38    0.17
  -7  -3  12    1.14    0.13
   7   3 -12    1.34    0.13
  -7   3  12    1.43    0.14
   6  -3 -12    5.35    0.23
   6  -3 -12    5.30    0.27
  -6  -3  12    5.52    0.24
   6   3 -12    5.61    0.24
  -6   3  12    5.65    0.23
   5  -3 -12    5.73    0.27
   5  -3 -12    5.33    0.22
  -5  -3  12    5.80    0.27
  -5  -3  12    5.50    0.22
  -5   3  12    5.38    0.22
   5   3 -12    5.36    0.22
   5   3 -12    5.31    0.22
   4  -3 -12   16.18    0.47
   4  -3 -12   16.32    0.52
  -4  -3  12   16.04    0.52
  -4  -3  12   15.91    0.47
  -4   3  12   15.91    0.46
  -4   3  12   16.19    0.46
   4   3 -12   16.25    0.47
   4   3 -12   15.64    0.47
  -3  -3  12    4.39    0.18
   3  -3 -12    5.09    0.23
   3  -3 -12    4.55    0.19
  -3  -3  12    4.85    0.22
  -3   3  12    4.55    0.18
   3   3 -12    4.62    0.19
   3   3 -12    4.75    0.19
  -3   3  12    4.87    0.19
   2  -3 -12    1.17    0.09
   2  -3 -12    0.95    0.11
  -2  -3  12    0.99    0.10
  -2  -3  12    1.27    0.08
   2   3 -12    1.22    0.10
   2   3 -12    1.14    0.08
  -2   3  12    1.07    0.07
  -2   3  12    1.13    0.09
  -1  -3  12    1.45    0.09
   1  -3 -12    1.65    0.12
   1  -3 -12    1.45    0.09
  -1  -3  12    1.65    0.09
  -1  -3  12    1.45    0.10
   1   3 -12    1.54    0.11
  -1   3  12    1.44    0.08
   1   3 -12    1.63    0.09
  -1   3  12    1.50    0.10
   0  -3  12   36.51    0.92
   0  -3  12   36.86    0.92
   0  -3  12   36.30    0.91
   0  -3 -12   36.53    0.93
   0  -3 -12   37.34    0.98
   0   3  12   38.07    0.90
   0   3  12   36.29    0.95
   0   3 -12   37.92    0.93
   0   3 -12   35.51    0.95
   1  -3  12   13.03    0.33
  -1  -3 -12   13.34    0.38
  -1  -3 -12   13.37    0.38
   1  -3  12   12.45    0.33
   1  -3  12   13.09    0.37
  -1  -3 -12   12.38    0.37
   1  -3  12   12.86    0.36
  -1   3 -12   12.73    0.38
  -1   3 -12   12.66    0.37
   1   3  12   12.38    0.39
  -1   3 -12   13.18    0.34
  -2  -3 -12    0.12    0.04
  -2   3 -12    0.09    0.03
   2   3  12    0.06    0.04
   2   3  12    0.09    0.03
  -2   3 -12    0.10    0.03
  -2   3 -12    0.07    0.04
  -2   3 -12    0.12    0.03
  -3  -3 -12   33.24    0.87
   3   3  12   34.26    0.89
  -3   3 -12   34.10    0.86
  -3   3 -12   34.16    0.86
   3   3  12   31.50    0.99
  -3   3 -12   35.20    0.86
   3   3  12   33.66    0.85
  -3   3 -12   34.49    0.87
  -4  -3 -12    0.32    0.06
  -4   3 -12    0.39    0.06
  -4   3 -12    0.27    0.05
   4   3  12    0.25    0.06
   4   3  12    0.40    0.06
  -4   3 -12    0.24    0.05
   5  -3  12    5.28    0.17
  -5  -3 -12    4.88    0.21
   5  -3  12    5.12    0.21
  -5   3 -12    5.61    0.20
  -5   3 -12    5.18    0.21
   5   3  12    5.41    0.21
   5   3  12    5.23    0.26
   6  -3  12    1.26    0.09
  -6  -3 -12    1.10    0.11
   6  -3  12    1.25    0.10
   6   3  12    1.12    0.11
  -6   3 -12    1.36    0.11
   7  -3  12    0.77    0.09
  -7  -3 -12    0.76    0.09
   7  -3  12    0.83    0.10
   7   3  12    0.89    0.11
  -7   3 -12    0.73    0.10
   8  -3  12    0.04    0.04
   8  -3  12    0.04    0.05
  -8  -3 -12    0.12    0.05
   8   3  12    0.14    0.06
  -8   3 -12    0.08    0.06
   8  -4 -12    0.35    0.08
  -8  -4  12    0.43    0.09
  -8   4  12    0.32    0.08
   8   4 -12    0.27    0.07
   7  -4 -12    0.58    0.11
  -7  -4  12    0.52    0.09
   7  -4 -12    0.37    0.08
   7   4 -12    0.65    0.10
  -7   4  12    0.45    0.09
  -6  -4  12   -0.03    0.04
   6  -4 -12   -0.04    0.05
   6  -4 -12    0.05    0.04
   6   4 -12    0.06    0.04
  -6   4  12    0.03    0.04
   5  -4 -12    0.12    0.06
  -5  -4  12    0.04    0.05
  -5  -4  12    0.06    0.05
   5  -4 -12    0.05    0.05
   5   4 -12    0.06    0.04
   5   4 -12    0.17    0.06
  -5   4  12    0.05    0.04
  -4  -4  12    3.33    0.20
   4  -4 -12    2.89    0.16
   4  -4 -12    3.43    0.21
  -4  -4  12    3.22    0.17
  -4   4  12    3.08    0.15
  -4   4  12    2.98    0.15
   4   4 -12    3.29    0.18
   4   4 -12    3.24    0.16
   3  -4 -12    9.80    0.38
  -3  -4  12    9.67    0.36
  -3  -4  12   10.19    0.33
   3  -4 -12   10.27    0.34
   3   4 -12   10.11    0.33
  -3   4  12   10.35    0.32
   3   4 -12   10.49    0.35
  -3   4  12   10.30    0.34
   2  -4 -12    2.42    0.16
   2  -4 -12    2.18    0.13
  -2  -4  12    2.38    0.15
  -2  -4  12    2.08    0.12
  -2  -4  12    2.16    0.13
   2   4 -12    2.40    0.14
  -2   4  12    2.18    0.13
   2   4 -12    2.24    0.12
  -2   4  12    2.12    0.11
   1  -4 -12    0.36    0.07
  -1  -4  12    0.53    0.07
   1  -4 -12    0.49    0.07
  -1  -4  12    0.68    0.08
  -1  -4  12    0.54    0.07
   1   4 -12    0.46    0.06
   1   4 -12    0.58    0.08
  -1   4  12    0.51    0.06
  -1   4  12    0.41    0.07
   0  -4  12   15.99    0.45
   0  -4  12   16.25    0.47
   0  -4 -12   16.49    0.52
   0  -4 -12   16.74    0.47
   0  -4  12   16.22    0.47
   0   4  12   16.13    0.44
   0   4 -12   15.99    0.49
   0   4 -12   16.84    0.46
   0   4  12   16.33    0.49
   1  -4  12    0.11    0.03
   1  -4  12    0.06    0.04
   1  -4  12    0.13    0.04
  -1  -4 -12    0.09    0.04
  -1   4 -12    0.09    0.03
   1   4  12    0.07    0.05
  -1   4 -12    0.06    0.05
  -2  -4 -12    0.99    0.10
  -2   4 -12    0.85    0.08
  -2   4 -12    0.97    0.08
  -2   4 -12    0.95    0.10
   2   4  12    0.69    0.09
  -3  -4 -12   17.13    0.50
  -3   4 -12   17.61    0.51
  -3   4 -12   17.77    0.49
  -3   4 -12   17.74    0.49
  -3   4 -12   17.89    0.50
   3   4  12   16.90    0.52
  -4  -4 -12    8.77    0.30
  -4   4 -12    9.21    0.30
  -4   4 -12    9.20    0.30
   4   4  12    9.38    0.33
   5  -4  12    2.28    0.09
  -5  -4 -12    2.30    0.13
  -5   4 -12    2.40    0.13
   5   4  12    2.07    0.14
  -5   4 -12    2.17    0.13
   6  -4  12    0.04    0.03
  -6  -4 -12    0.02    0.04
  -6   4 -12    0.00    0.04
   7  -4  12    0.85    0.09
  -7  -4 -12    1.13    0.14
   7   4  12    0.95    0.11
  -7   4 -12    0.80    0.11
   8  -4  12    0.48    0.08
   8   4  12    0.49    0.08
  -8   4 -12    0.27    0.08
  -7  -5  12    1.45    0.15
   7  -5 -12    1.46    0.15
   7  -5 -12    1.17    0.15
   7   5 -12    1.36    0.11
  -7   5  12    1.47    0.15
  -6  -5  12    0.51    0.10
   6  -5 -12    0.37    0.08
   6  -5 -12    0.54    0.11
   6   5 -12    0.39    0.08
  -6   5  12    0.39    0.08
   5  -5 -12    2.31    0.19
  -5  -5  12    1.92    0.20
  -5  -5  12    1.78    0.14
   5  -5 -12    2.06    0.15
   5   5 -12    1.88    0.15
  -5   5  12    2.02    0.14
   5   5 -12    2.09    0.14
   4  -5 -12    3.30    0.18
   4  -5 -12    3.61    0.22
  -4  -5  12    3.38    0.22
  -4  -5  12    3.49    0.19
   4   5 -12    3.32    0.19
  -4   5  12    3.54    0.18
   4   5 -12    3.47    0.17
  -4   5  12    3.59    0.18
   3  -5 -12    0.09    0.05
  -3  -5  12    0.16    0.07
  -3  -5  12    0.04    0.05
   3  -5 -12    0.12    0.06
  -3   5  12    0.14    0.05
  -3   5  12    0.14    0.05
   3   5 -12    0.10    0.04
   3   5 -12    0.10    0.05
  -2  -5  12    1.72    0.14
   2  -5 -12    1.68    0.12
  -2  -5  12    1.73    0.12
   2  -5 -12    2.15    0.17
  -2  -5  12    1.84    0.13
   2   5 -12    1.57    0.13
  -2   5  12    1.71    0.13
  -2   5  12    1.74    0.11
   2   5 -12    1.79    0.11
  -1  -5  12    1.07    0.11
   1  -5 -12    1.19    0.14
   1  -5 -12    1.30    0.11
  -1  -5  12    1.14    0.11
  -1  -5  12    1.10    0.11
   1   5 -12    1.06    0.12
  -1   5  12    1.16    0.12
  -1   5  12    1.11    0.09
   0  -5  12    1.04    0.11
   0  -5 -12    1.06    0.13
   0  -5 -12    1.17    0.11
   0  -5 -12    1.00    0.08
   0  -5  12    1.07    0.11
   0  -5 -12    1.09    0.10
   0  -5  12    1.08    0.10
   0   5  12    1.07    0.12
   0   5 -12    1.17    0.12
   1  -5  12    4.49    0.20
   1  -5  12    4.84    0.21
   1  -5  12    4.30    0.18
  -1  -5 -12    4.78    0.20
   1   5  12    4.68    0.22
  -1   5 -12    4.82    0.22
   2  -5  12    3.44    0.17
   2  -5  12    3.43    0.17
  -2  -5 -12    3.28    0.16
   2  -5  12    3.20    0.13
   2   5  12    2.97    0.18
  -2   5 -12    3.57    0.18
   3  -5  12    0.62    0.05
  -3  -5 -12    0.66    0.09
  -3   5 -12    0.83    0.10
  -3   5 -12    0.79    0.09
   3   5  12    0.49    0.09
   4  -5  12    3.02    0.11
  -4  -5 -12    3.09    0.16
   4   5  12    3.38    0.19
  -4   5 -12    3.13    0.16
   5  -5  12    0.52    0.08
  -5  -5 -12    0.53    0.08
   5  -5  12    0.71    0.06
  -5   5 -12    0.78    0.10
   5   5  12    0.53    0.09
   6  -5  12    5.50    0.20
   6  -5  12    5.42    0.25
  -6   5 -12    5.64    0.24
   7  -5  12    0.03    0.04
   7  -5  12    0.07    0.06
   5  -6 -12    0.05    0.05
  -5  -6  12    0.01    0.06
   5  -6 -12    0.17    0.07
  -5  -6  12    0.11    0.06
  -5   6  12    0.06    0.04
   5   6 -12    0.01    0.04
   4  -6 -12    0.86    0.13
  -4  -6  12    1.14    0.16
   4  -6 -12    0.92    0.12
  -4  -6  12    1.09    0.13
  -4   6  12    0.96    0.11
   4   6 -12    1.19    0.14
   3  -6 -12    4.52    0.23
  -3  -6  12    4.58    0.23
   3  -6 -12    4.88    0.27
  -3  -6  12    4.47    0.25
  -3   6  12    4.50    0.22
  -3   6  12    4.70    0.21
   3   6 -12    4.30    0.23
  -2  -6  12    0.13    0.05
   2  -6 -12    0.20    0.06
  -2  -6  12    0.25    0.07
   2  -6 -12    0.20    0.07
  -2  -6  12    0.26    0.08
  -2   6  12    0.21    0.06
  -2   6  12    0.14    0.06
   2   6 -12    0.07    0.06
  -1  -6  12    0.07    0.05
  -1  -6  12    0.03    0.05
   1  -6 -12    0.06    0.05
  -1  -6  12    0.08    0.06
   1   6 -12    0.06    0.05
  -1   6  12    0.04    0.04
  -1   6  12    0.11    0.06
   0  -6 -12    0.26    0.07
   0  -6  12    0.28    0.07
   0  -6  12    0.18    0.06
   0  -6  12    0.30    0.07
   0   6 -12    0.20    0.07
   0   6  12    0.17    0.07
   1  -6  12    0.27    0.07
   1  -6  12    0.36    0.07
  -1  -6 -12    0.28    0.07
   1  -6  12    0.51    0.09
  -1   6 -12    0.34    0.08
   1   6  12    0.38    0.09
   2  -6  12    0.00    0.05
  -2  -6 -12    0.06    0.04
   2  -6  12   -0.05    0.03
   2  -6  12    0.07    0.06
  -2   6 -12    0.06    0.04
   2   6  12    0.09    0.06
  -3  -6 -12    0.01    0.03
   3  -6  12    0.05    0.03
   3  -6  12    0.02    0.05
   3  -6  12    0.03    0.05
  -3   6 -12    0.00    0.03
   3   6  12    0.03    0.05
   4  -6  12    0.17    0.04
  -4   6 -12    0.09    0.05
   4   6  12    0.09    0.06
   5  -6  12    1.47    0.09
   5   6  12    1.44    0.13
  -5   6 -12    1.26    0.13
  -3  -7  12    6.37    0.40
   3  -7 -12    5.93    0.31
   3  -7 -12    5.94    0.28
  -3  -7  12    6.65    0.47
  -3   7  12    6.28    0.28
  -3   7  12    6.92    0.28
  -2  -7  12    0.96    0.14
  -2  -7  12    0.95    0.13
  -2  -7  12    1.14    0.14
   2  -7 -12    0.95    0.12
  -2   7  12    1.23    0.14
   2   7 -12    0.90    0.13
  -1  -7  12    1.88    0.16
   1  -7 -12    1.57    0.13
  -1  -7  12    1.58    0.16
  -1  -7  12    1.59    0.17
   1   7 -12    1.44    0.16
  -1   7  12    1.87    0.16
   0  -7 -12    0.13    0.06
   0  -7  12    0.12    0.06
   0  -7  12    0.03    0.05
   0  -7  12    0.07    0.05
   0   7 -12    0.12    0.06
   0   7  12    0.13    0.06
   1  -7  12    0.41    0.09
   1  -7  12    0.51    0.09
  -1  -7 -12    0.51    0.08
   1  -7  12    0.53    0.10
  -1   7 -12    0.50    0.09
   1   7  12    0.51    0.10
   2  -7  12    0.02    0.05
   2  -7  12   -0.02    0.04
   2  -7  12   -0.01    0.05
   2   7  12    0.02    0.05
  -2   7 -12    0.02    0.04
   9   0 -13    0.00    0.04
  -9   0  13    0.00    0.04
  -8   0  13   -0.01    0.04
   8   0 -13    0.03    0.04
   7   0 -13    0.01    0.04
  -7   0  13    0.02    0.04
   6   0 -13    0.02    0.04
  -6   0  13    0.00    0.03
   5   0 -13    0.02    0.03
  -5   0  13    0.02    0.03
  -5   0  13   -0.02    0.03
   4   0 -13   -0.01    0.02
  -4   0  13    0.03    0.04
  -4   0  13    0.04    0.03
   4   0 -13   -0.01    0.02
  -4   0  13   -0.01    0.02
  -3   0  13   -0.01    0.04
   3   0 -13    0.00    0.02
  -3   0  13   -0.02    0.02
   3   0 -13    0.01    0.02
  -3   0  13    0.00    0.02
  -2   0  13    0.02    0.03
  -2   0  13    0.01    0.04
  -2   0  13   -0.01    0.02
   2   0 -13   -0.01    0.02
   2   0 -13   -0.01    0.02
   1   0 -13   -0.05    0.01
   1   0 -13   -0.07    0.02
  -1   0  13    0.00    0.01
  -1   0  13   -0.02    0.03
  -1   0  13    0.01    0.03
  -1   0 -13   -0.01    0.02
  -1   0 -13    0.03    0.02
   1   0  13    0.01    0.02
   1   0  13    0.01    0.03
  -2   0 -13    0.03    0.02
   2   0  13    0.02    0.03
  -2   0 -13   -0.02    0.02
   2   0  13    0.02    0.03
  -3   0 -13    0.01    0.02
   3   0  13    0.03    0.03
   3   0  13   -0.03    0.03
  -3   0 -13    0.02    0.03
   4   0  13    0.00    0.03
   4   0  13    0.02    0.03
   4   0  13   -0.02    0.03
  -4   0 -13    0.00    0.03
   5   0  13   -0.02    0.03
  -5   0 -13    0.03    0.03
   5   0  13   -0.01    0.04
   6   0  13    0.00    0.05
   6   0  13    0.02    0.04
  -6   0 -13    0.04    0.04
  -7   0 -13   -0.05    0.04
   7   0  13    0.07    0.06
   7   0  13    0.05    0.05
   8   0  13    0.15    0.07
  -8   0 -13   -0.05    0.04
   8   0  13   -0.05    0.04
   9   0  13   -0.02    0.04
   9   0  13    0.00    0.05
  -9   0 -13   -0.06    0.04
   9  -1 -13    1.57    0.17
  -9  -1  13    1.43    0.15
   9   1 -13    1.69    0.16
  -9   1  13    1.53    0.15
  -8  -1  13    1.19    0.13
   8  -1 -13    1.39    0.11
   8   1 -13    1.34    0.13
  -8   1  13    1.28    0.13
  -7  -1  13    0.09    0.05
   7  -1 -13    0.00    0.03
   7   1 -13   -0.01    0.03
  -7   1  13    0.02    0.05
  -6  -1  13    5.99    0.24
   6  -1 -13    6.59    0.23
   6  -1 -13    6.50    0.23
   6   1 -13    6.12    0.24
  -6   1  13    6.38    0.24
   5  -1 -13   24.78    0.66
  -5  -1  13   26.03    0.75
  -5  -1  13   25.67    0.67
   5  -1 -13   25.11    0.67
  -5  -1  13   24.95    0.68
  -5   1  13   25.20    0.68
   5   1 -13   24.51    0.68
  -5   1  13   25.69    0.72
   4  -1 -13   10.86    0.32
  -4  -1  13   10.42    0.33
   4  -1 -13   10.75    0.31
  -4  -1  13   10.95    0.38
  -4  -1  13   10.09    0.32
   4   1 -13   10.42    0.33
  -4   1  13   10.96    0.32
  -4   1  13   10.63    0.32
   3  -1 -13   10.13    0.34
  -3  -1  13    9.61    0.28
  -3  -1  13    9.72    0.30
  -3  -1  13    8.91    0.33
   3  -1 -13    9.72    0.28
   3  -1 -13    9.57    0.28
  -3   1  13    9.57    0.30
  -3   1  13    9.43    0.33
  -3   1  13    9.96    0.28
   3   1 -13    9.37    0.30
  -2  -1  13    3.35    0.16
   2  -1 -13    3.64    0.13
   2  -1 -13    3.58    0.16
  -2  -1  13    3.05    0.14
   2  -1 -13    3.51    0.13
  -2  -1  13    3.81    0.13
  -2   1  13    3.52    0.15
  -2   1  13    3.55    0.12
   2   1 -13    3.65    0.14
   2   1 -13    3.69    0.11
  -2   1  13    3.78    0.17
  -1  -1  13  136.07    3.31
   1  -1 -13  132.41    3.28
   1  -1 -13  141.07    3.28
   1  -1 -13  142.86    3.33
  -1  -1  13  144.91    3.27
   1   1 -13  144.54    3.26
   1   1 -13  135.29    3.29
  -1   1  13  140.84    3.25
  -1   1  13  139.01    3.33
   0  -1  13    0.06    0.02
   0  -1 -13    0.01    0.02
   0  -1  13    0.04    0.03
   0  -1  13    0.02    0.03
   0  -1 -13    0.06    0.02
   0   1 -13    0.07    0.02
   0   1  13    0.03    0.03
   0   1  13    0.06    0.03
   0   1 -13    0.05    0.02
   1  -1  13   51.52    1.18
  -1  -1 -13   47.74    1.21
   1  -1  13   51.95    1.18
   1  -1  13   51.84    1.22
   1  -1  13   49.34    1.23
   1  -1  13   49.26    1.21
  -1  -1 -13   48.80    1.21
   1   1  13   47.34    1.24
  -1   1 -13   51.11    1.20
   1   1  13   50.67    1.23
  -1   1 -13   48.47    1.22
   2  -1  13   14.66    0.41
  -2  -1 -13   14.61    0.41
   2  -1  13   14.81    0.39
  -2  -1 -13   15.14    0.40
   2   1  13   14.69    0.43
  -2   1 -13   14.87    0.41
  -2   1 -13   14.91    0.40
   2   1  13   14.47    0.41
   3  -1  13    0.46    0.05
   3  -1  13    0.61    0.06
  -3  -1 -13    0.49    0.06
   3   1  13    0.47    0.06
  -3   1 -13    0.45    0.06
  -3   1 -13    0.53    0.06
   3   1  13    0.45    0.07
   3   1  13    0.51    0.06
  -4  -1 -13    6.43    0.23
   4  -1  13    7.01    0.22
   4  -1  13    6.73    0.23
   4  -1  13    6.75    0.22
  -4   1 -13    6.35    0.23
   4   1  13    7.02    0.23
   4   1  13    6.45    0.26
  -4   1 -13    6.49    0.23
   4   1  13    6.91    0.23
   5  -1  13    0.78    0.09
   5  -1  13    0.73    0.08
  -5  -1 -13    0.70    0.08
  -5   1 -13    0.83    0.09
   5   1  13    0.77    0.10
   5   1  13    0.78    0.09
   6  -1  13   19.40    0.56
  -6  -1 -13   19.34    0.55
   6  -1  13   18.94    0.55
   6   1  13   18.33    0.55
   6   1  13   19.59    0.60
  -6   1 -13   18.01    0.54
  -7  -1 -13    0.10    0.05
   7  -1  13    0.11    0.05
   7  -1  13    0.10    0.06
  -7   1 -13    0.12    0.06
   7   1  13    0.21    0.08
   7   1  13    0.13    0.06
   8  -1  13    1.83    0.15
  -8  -1 -13    1.43    0.12
   8  -1  13    1.65    0.14
   8   1  13    1.72    0.14
  -8   1 -13    1.63    0.13
   8   1  13    1.47    0.17
   9  -1  13    0.39    0.08
  -9  -1 -13    0.44    0.08
   9  -1  13    0.45    0.09
   9   1  13    0.42    0.10
  -9   1 -13    0.36    0.08
   9   1  13    0.39    0.09
  -9  -2  13    1.42    0.15
  -9   2  13    1.37    0.15
   9   2 -13    1.32    0.15
  -8  -2  13    0.20    0.06
   8  -2 -13    0.15    0.05
   8   2 -13    0.11    0.05
  -8   2  13    0.15    0.06
  -7  -2  13    0.00    0.04
   7  -2 -13    0.00    0.03
  -7   2  13   -0.03    0.03
   7   2 -13    0.00    0.04
  -6  -2  13    6.76    0.26
   6  -2 -13    6.87    0.25
   6   2 -13    7.21    0.27
  -6   2  13    7.11    0.26
  -5  -2  13    5.12    0.21
  -5  -2  13    5.45    0.26
   5  -2 -13    5.11    0.20
   5  -2 -13    5.15    0.25
  -5  -2  13    5.38    0.21
   5   2 -13    5.12    0.21
  -5   2  13    5.49    0.21
   4  -2 -13   14.58    0.47
  -4  -2  13   14.11    0.41
   4  -2 -13   14.18    0.41
  -4  -2  13   13.89    0.47
   4  -2 -13   14.92    0.40
   4   2 -13   13.47    0.42
   4   2 -13   14.03    0.42
  -4   2  13   14.56    0.41
  -4   2  13   14.04    0.41
  -3  -2  13    7.18    0.23
   3  -2 -13    7.30    0.24
  -3  -2  13    7.02    0.27
   3  -2 -13    7.16    0.28
   3  -2 -13    7.27    0.22
   3   2 -13    6.84    0.25
   3   2 -13    7.01    0.24
  -3   2  13    7.08    0.22
  -3   2  13    6.71    0.24
  -2  -2  13   16.97    0.50
  -2  -2  13   17.90    0.47
   2  -2 -13   17.09    0.47
   2  -2 -13   18.23    0.45
   2   2 -13   17.26    0.48
  -2   2  13   17.49    0.46
  -2   2  13   17.32    0.49
   2   2 -13   17.54    0.49
   1  -2 -13    0.21    0.04
   1  -2 -13    0.19    0.03
  -1  -2  13    0.22    0.05
  -1  -2  13    0.17    0.03
   1  -2 -13    0.14    0.04
   1   2 -13    0.23    0.04
   1   2 -13    0.25    0.05
  -1   2  13    0.22    0.05
  -1   2  13    0.16    0.03
  -1   2  13    0.13    0.04
   0  -2  13    4.34    0.15
   0  -2  13    4.14    0.15
   0  -2  13    4.47    0.14
   0  -2 -13    4.26    0.16
   0  -2 -13    4.45    0.14
   0   2  13    4.41    0.18
   0   2  13    4.54    0.15
   0   2 -13    3.90    0.17
   0   2 -13    4.05    0.16
   0   2  13    4.33    0.19
   0   2 -13    4.39    0.13
   1  -2  13   18.10    0.47
   1  -2  13   18.14    0.47
  -1  -2 -13   18.78    0.47
  -1  -2 -13   17.91    0.49
   1  -2  13   18.94    0.46
   1  -2  13   18.13    0.46
   1   2  13   18.41    0.53
   1   2  13   16.96    0.50
  -1   2 -13   18.23    0.50
  -1   2 -13   18.51    0.49
  -1   2 -13   18.51    0.47
   2  -2  13    3.43    0.11
   2  -2  13    3.55    0.15
  -2  -2 -13    3.38    0.14
   2  -2  13    3.48    0.11
   2   2  13    3.46    0.17
  -2   2 -13    3.59    0.14
   2   2  13    3.38    0.13
  -2   2 -13    3.45    0.13
   2   2  13    3.26    0.15
  -2   2 -13    3.58    0.12
   3  -2  13    0.09    0.04
   3  -2  13    0.07    0.02
   3  -2  13    0.04    0.02
  -3  -2 -13    0.06    0.03
   3   2  13    0.07    0.03
  -3   2 -13    0.09    0.03
  -3   2 -13    0.07    0.02
  -3   2 -13    0.09    0.03
   3   2  13    0.00    0.04
   3   2  13    0.05    0.04
  -4  -2 -13    7.24    0.25
   4  -2  13    7.29    0.22
   4   2  13    7.57    0.26
  -4   2 -13    7.28    0.25
   4   2  13    7.41    0.25
  -4   2 -13    7.68    0.25
   4   2  13    7.46    0.30
   5  -2  13    9.47    0.31
  -5  -2 -13    8.78    0.30
   5  -2  13    8.99    0.28
  -5   2 -13    8.67    0.30
   5   2  13    9.07    0.35
   5   2  13    9.24    0.30
   6  -2  13    0.56    0.08
   6  -2  13    0.56    0.07
  -6  -2 -13    0.45    0.07
   6   2  13    0.61    0.08
   6   2  13    0.57    0.10
  -6   2 -13    0.54    0.08
  -7  -2 -13    1.48    0.12
   7  -2  13    1.41    0.13
   7  -2  13    1.41    0.12
   7   2  13    1.65    0.13
   7   2  13    1.56    0.17
  -7   2 -13    1.14    0.12
   8  -2  13   -0.02    0.05
   8  -2  13    0.07    0.05
  -8  -2 -13    0.09    0.05
   8   2  13    0.05    0.05
   8   2  13    0.01    0.04
  -8   2 -13    0.01    0.05
   9  -2  13    0.83    0.12
   9  -2  13    0.92    0.12
  -9  -2 -13    0.51    0.09
   9   2  13    0.72    0.11
  -9   2 -13    0.80    0.11
  -8  -3  13    2.61    0.17
   8  -3 -13    2.80    0.17
  -8   3  13    3.07    0.18
   8   3 -13    2.61    0.18
   7  -3 -13    0.47    0.08
  -7  -3  13    0.52    0.09
  -7   3  13    0.47    0.08
   7   3 -13    0.47    0.08
   6  -3 -13    1.81    0.12
   6  -3 -13    1.79    0.16
  -6  -3  13    1.79    0.13
  -6   3  13    1.78    0.12
   6   3 -13    1.82    0.13
   5  -3 -13    0.02    0.04
   5  -3 -13    0.02    0.04
  -5  -3  13    0.09    0.05
  -5  -3  13    0.06    0.06
   5   3 -13    0.04    0.04
   5   3 -13   -0.01    0.03
  -5   3  13   -0.01    0.03
   4  -3 -13    0.04    0.04
  -4  -3  13    0.12    0.06
   4  -3 -13    0.01    0.05
  -4  -3  13    0.08    0.04
  -4   3  13    0.03    0.03
   4   3 -13    0.04    0.04
   4   3 -13    0.00    0.03
  -4   3  13    0.01    0.03
  -3  -3  13   16.77    0.48
   3  -3 -13   17.32    0.49
  -3  -3  13   16.94    0.52
   3  -3 -13   17.97    0.55
  -3   3  13   16.79    0.47
   3   3 -13   16.99    0.49
  -3   3  13   17.40    0.49
   3   3 -13   16.44    0.50
  -2  -3  13    4.51    0.17
   2  -3 -13    4.72    0.22
  -2  -3  13    4.36    0.20
   2  -3 -13    4.42    0.18
   2   3 -13    4.59    0.18
   2   3 -13    4.50    0.19
  -2   3  13    4.61    0.16
  -2   3  13    4.77    0.19
  -1  -3  13    6.72    0.24
   1  -3 -13    7.00    0.24
   1  -3 -13    6.96    0.28
  -1  -3  13    7.16    0.23
  -1  -3  13    6.58    0.23
  -1   3  13    6.87    0.25
   1   3 -13    6.88    0.23
   1   3 -13    7.04    0.25
  -1   3  13    7.23    0.21
   0  -3 -13    1.56    0.16
   0  -3  13    1.29    0.08
   0  -3 -13    1.23    0.09
   0  -3  13    1.16    0.08
   0  -3  13    1.20    0.08
   0   3 -13    1.23    0.10
   0   3 -13    1.32    0.09
   0   3  13    1.19    0.10
   1  -3  13   22.23    0.58
   1  -3  13   23.58    0.61
   1  -3  13   23.74    0.61
  -1  -3 -13   23.31    0.63
  -1   3 -13   23.37    0.64
  -1   3 -13   23.37    0.62
   1   3  13   23.76    0.65
  -1   3 -13   24.51    0.64
  -2  -3 -13    5.53    0.21
  -2   3 -13    5.68    0.19
   2   3  13    5.40    0.22
  -2   3 -13    5.47    0.20
  -2   3 -13    5.60    0.19
   2   3  13    5.83    0.19
  -2   3 -13    5.84    0.21
  -3  -3 -13    0.73    0.08
  -3   3 -13    0.77    0.08
   3   3  13    0.80    0.07
  -3   3 -13    0.94    0.08
  -3   3 -13    0.88    0.07
   3   3  13    0.93    0.10
  -3   3 -13    0.76    0.08
  -4  -3 -13   14.13    0.42
   4   3  13   14.54    0.41
  -4   3 -13   14.23    0.42
  -4   3 -13   13.96    0.41
   4   3  13   13.79    0.43
  -4   3 -13   14.31    0.41
   5  -3  13    0.18    0.04
  -5  -3 -13    0.16    0.05
   5  -3  13    0.23    0.05
  -5   3 -13    0.23    0.05
   5   3  13    0.24    0.05
   6  -3  13    0.40    0.06
   6  -3  13    0.44    0.07
  -6  -3 -13    0.38    0.07
  -6   3 -13    0.46    0.08
   6   3  13    0.58    0.08
   7  -3  13    0.07    0.04
   7  -3  13    0.09    0.05
  -7  -3 -13    0.10    0.04
  -7   3 -13    0.04    0.05
   7   3  13   -0.02    0.04
   8  -3  13   -0.02    0.04
  -8  -3 -13   -0.01    0.04
   8  -3  13    0.02    0.04
  -8   3 -13    0.05    0.05
   8   3  13    0.09    0.05
   8  -4 -13    0.07    0.05
  -8  -4  13    0.03    0.05
   8   4 -13    0.10    0.05
  -8   4  13   -0.01    0.04
  -7  -4  13    0.90    0.12
   7  -4 -13    1.05    0.12
  -7   4  13    0.72    0.10
   7   4 -13    0.82    0.11
   6  -4 -13    2.60    0.16
   6  -4 -13    2.73    0.20
  -6  -4  13    2.55    0.17
   6   4 -13    2.79    0.16
  -6   4  13    2.37    0.15
  -5  -4  13   -0.08    0.03
   5  -4 -13    0.00    0.04
   5  -4 -13    0.00    0.05
  -5  -4  13    0.03    0.05
  -5   4  13   -0.01    0.03
   5   4 -13   -0.03    0.03
   5   4 -13    0.00    0.04
  -4  -4  13    0.71    0.09
   4  -4 -13    0.67    0.11
  -4  -4  13    0.78    0.12
   4  -4 -13    0.66    0.09
   4   4 -13    0.75    0.09
   4   4 -13    0.72    0.09
  -4   4  13    0.64    0.08
  -4   4  13    0.66    0.08
   3  -4 -13    0.23    0.06
   3  -4 -13    0.41    0.09
  -3  -4  13    0.33    0.08
  -3  -4  13    0.29    0.06
   3   4 -13    0.23    0.06
   3   4 -13    0.34    0.06
  -3   4  13    0.37    0.07
  -3   4  13    0.36    0.06
   2  -4 -13    0.01    0.04
   2  -4 -13    0.11    0.06
  -2  -4  13    0.08    0.04
  -2  -4  13    0.05    0.05
  -2  -4  13    0.04    0.04
  -2   4  13    0.12    0.05
   2   4 -13    0.06    0.04
  -2   4  13    0.11    0.04
   2   4 -13    0.13    0.04
  -1  -4  13    2.45    0.13
   1  -4 -13    2.46    0.13
   1  -4 -13    2.31    0.16
  -1  -4  13    2.15    0.13
  -1  -4  13    2.46    0.14
   1   4 -13    2.12    0.14
  -1   4  13    2.30    0.11
  -1   4  13    2.36    0.14
   1   4 -13    2.38    0.12
   0  -4  13    2.19    0.12
   0  -4  13    1.95    0.11
   0  -4  13    1.99    0.12
   0  -4 -13    2.10    0.13
   0   4 -13    2.10    0.11
   0   4  13    2.00    0.13
   0   4 -13    2.03    0.13
   1  -4  13    1.77    0.11
  -1  -4 -13    1.63    0.11
   1  -4  13    1.58    0.08
   1  -4  13    1.70    0.11
  -1   4 -13    1.61    0.10
   1   4  13    1.76    0.13
  -1   4 -13    1.46    0.11
   2  -4  13   15.08    0.44
   2  -4  13   15.28    0.45
  -2  -4 -13   15.06    0.45
  -2   4 -13   15.41    0.46
  -2   4 -13   15.53    0.43
   2   4  13   14.69    0.47
  -3  -4 -13   13.08    0.40
   3   4  13   13.01    0.42
  -3   4 -13   13.52    0.39
  -3   4 -13   12.94    0.39
  -3   4 -13   13.30    0.41
  -3   4 -13   12.78    0.38
  -4  -4 -13    0.02    0.04
  -4   4 -13   -0.02    0.03
  -4   4 -13    0.03    0.03
   4   4  13   -0.04    0.03
  -4   4 -13    0.03    0.03
  -5  -4 -13    0.21    0.05
   5  -4  13    0.15    0.03
   5   4  13    0.16    0.05
  -5   4 -13    0.21    0.05
   6  -4  13    0.69    0.07
  -6  -4 -13    0.40    0.07
  -6   4 -13    0.66    0.09
   7  -4  13    0.54    0.08
  -7  -4 -13    0.65    0.09
  -7   4 -13    0.38    0.08
   8  -4  13    0.21    0.07
   8   4  13    0.26    0.05
  -8   4 -13    0.17    0.07
   7  -5 -13    0.27    0.08
   7  -5 -13    0.17    0.07
  -7  -5  13    0.22    0.07
   7   5 -13    0.07    0.04
  -7   5  13    0.13    0.06
  -6  -5  13    0.38    0.08
   6  -5 -13    0.41    0.08
   6  -5 -13    0.64    0.11
   6   5 -13    0.54    0.09
  -6   5  13    0.54    0.09
   5  -5 -13    0.98    0.12
  -5  -5  13    0.93    0.14
   5  -5 -13    0.94    0.14
  -5  -5  13    0.77    0.11
  -5   5  13    0.82    0.11
   5   5 -13    0.89    0.12
   5   5 -13    1.29    0.13
   4  -5 -13    4.96    0.27
   4  -5 -13    4.83    0.23
  -4  -5  13    4.91    0.26
  -4  -5  13    5.23    0.24
  -4   5  13    5.05    0.22
   4   5 -13    4.84    0.21
  -4   5  13    4.87    0.22
   4   5 -13    5.07    0.24
  -3  -5  13    2.17    0.17
   3  -5 -13    2.09    0.14
  -3  -5  13    2.14    0.14
   3  -5 -13    2.42    0.18
   3   5 -13    2.16    0.15
  -3   5  13    2.10    0.14
  -3   5  13    2.01    0.13
   3   5 -13    2.34    0.13
  -2  -5  13    0.63    0.09
  -2  -5  13    0.46    0.08
   2  -5 -13    0.43    0.10
  -2  -5  13    0.60    0.08
   2  -5 -13    0.55    0.09
   2   5 -13    0.54    0.09
  -2   5  13    0.54    0.07
   2   5 -13    0.52    0.07
  -2   5  13    0.63    0.09
   1  -5 -13    2.86    0.19
  -1  -5  13    2.72    0.16
  -1  -5  13    2.65    0.16
  -1  -5  13    2.65    0.15
   1  -5 -13    2.70    0.15
   1   5 -13    2.69    0.16
  -1   5  13    2.80    0.17
   0  -5  13   -0.01    0.04
   0  -5  13    0.07    0.04
   0  -5 -13    0.08    0.05
   0  -5  13    0.08    0.05
   0   5  13    0.07    0.05
   0   5 -13    0.09    0.05
   1  -5  13    1.48    0.12
   1  -5  13    1.57    0.10
   1  -5  13    1.49    0.11
  -1  -5 -13    1.57    0.11
   1   5  13    1.56    0.13
  -1   5 -13    1.67    0.13
   2  -5  13    6.79    0.26
   2  -5  13    7.03    0.27
  -2  -5 -13    6.72    0.26
   2  -5  13    6.55    0.21
  -2   5 -13    6.89    0.27
   2   5  13    6.77    0.28
  -3  -5 -13    8.25    0.30
  -3   5 -13    8.57    0.31
  -3   5 -13    7.96    0.29
   3   5  13    7.81    0.32
  -4  -5 -13    0.19    0.05
   4   5  13    0.21    0.07
  -4   5 -13    0.36    0.07
   5  -5  13    2.89    0.16
  -5  -5 -13    2.88    0.16
   5   5  13    2.97    0.18
  -5   5 -13    2.87    0.16
   6  -5  13    0.40    0.06
   6  -5  13    0.54    0.09
   7  -5  13    1.67    0.14
   7  -5  13    1.63    0.11
   5  -6 -13    0.30    0.08
  -5  -6  13    0.35    0.08
  -5  -6  13    0.17    0.07
   5  -6 -13    0.30    0.08
   5   6 -13    0.36    0.09
  -5   6  13    0.34    0.07
   4  -6 -13    0.94    0.14
  -4  -6  13    0.87    0.12
   4  -6 -13    0.94    0.12
  -4  -6  13    0.74    0.13
  -4   6  13    0.75    0.10
   4   6 -13    0.78    0.12
   3  -6 -13    2.70    0.20
  -3  -6  13    3.01    0.18
  -3  -6  13    2.87    0.20
   3  -6 -13    2.59    0.17
  -3   6  13    2.86    0.18
  -3   6  13    2.58    0.16
   3   6 -13    2.79    0.19
  -2  -6  13    0.22    0.07
   2  -6 -13    0.19    0.06
   2  -6 -13    0.25    0.08
  -2  -6  13    0.35    0.08
  -2  -6  13    0.24    0.07
   2   6 -13    0.17    0.06
  -2   6  13    0.25    0.07
  -1  -6  13    0.01    0.05
   1  -6 -13    0.03    0.05
  -1  -6  13    0.08    0.06
  -1  -6  13   -0.03    0.04
   1   6 -13    0.05    0.05
  -1   6  13    0.03    0.05
   0  -6 -13    0.03    0.04
   0  -6  13   -0.01    0.04
   0  -6  13    0.01    0.04
   0  -6  13    0.00    0.04
   0   6 -13   -0.03    0.04
   0   6  13    0.01    0.05
   1  -6  13    0.28    0.07
  -1  -6 -13    0.22    0.06
   1  -6  13    0.21    0.07
   1  -6  13    0.36    0.07
   1   6  13    0.38    0.09
  -1   6 -13    0.35    0.08
   2  -6  13    1.20    0.13
   2  -6  13    1.18    0.13
   2  -6  13    0.91    0.09
  -2  -6 -13    1.11    0.12
  -2   6 -13    1.12    0.13
   2   6  13    1.23    0.14
   3  -6  13    0.48    0.09
  -3  -6 -13    0.52    0.08
   3  -6  13    0.44    0.06
   3  -6  13    0.64    0.10
   3   6  13    0.51    0.10
  -3   6 -13    0.46    0.08
   4  -6  13    0.41    0.05
   4   6  13    0.41    0.09
  -4   6 -13    0.44    0.07
   5  -6  13    0.02    0.02
  -5   6 -13    0.06    0.03
   5   6  13    0.07    0.05
  -2  -7  13    2.02    0.16
  -2  -7  13    1.73    0.18
  -2  -7  13    1.83    0.22
   2  -7 -13    1.86    0.15
   2   7 -13    1.59    0.20
  -2   7  13    1.89    0.15
  -1  -7  13    2.05    0.16
  -1  -7  13    2.27    0.17
  -1  -7  13    2.01    0.16
   1  -7 -13    2.42    0.16
  -1   7  13    2.03    0.17
   1   7 -13    1.87    0.16
   0  -7  13   -0.05    0.04
   0  -7  13    0.01    0.05
   0  -7 -13    0.05    0.04
   0  -7  13    0.00    0.05
   0   7  13    0.01    0.04
   0   7 -13   -0.03    0.04
  -1  -7 -13   -0.03    0.04
   1  -7  13   -0.05    0.04
   1  -7  13    0.06    0.06
   1  -7  13   -0.03    0.04
  -1   7 -13    0.01    0.04
   1   7  13    0.08    0.05
   2  -7  13    0.02    0.04
   2  -7  13   -0.07    0.04
   2  -7  13    0.10    0.06
   2   7  13    0.01    0.06
  -2   7 -13    0.06    0.04
   9   0 -14    3.19    0.18
  -9   0  14    2.81    0.18
   8   0 -14    2.03    0.14
  -8   0  14    2.15    0.15
  -7   0  14    5.75    0.24
   7   0 -14    5.54    0.23
   6   0 -14    0.37    0.07
  -6   0  14    0.20    0.05
  -5   0  14    0.23    0.05
  -5   0  14    0.17    0.05
   5   0 -14    0.19    0.05
  -4   0  14    0.09    0.04
   4   0 -14    0.13    0.03
  -4   0  14    0.08    0.05
  -4   0  14    0.09    0.04
   4   0 -14    0.05    0.03
  -3   0  14    6.64    0.23
  -3   0  14    6.85    0.21
   3   0 -14    6.77    0.22
   3   0 -14    6.62    0.20
   2   0 -14  219.06    5.05
   2   0 -14  212.42    5.07
  -2   0  14  223.90    5.05
  -2   0  14  211.98    5.09
   1   0 -14   59.87    1.46
  -1   0  14   58.92    1.49
   1   0 -14   59.49    1.44
  -1   0  14   62.61    1.42
   0   0 -14   15.93    0.43
   0   0 -14   16.13    0.42
   0   0  14   16.18    0.45
   0   0  14   16.14    0.45
   1   0  14    3.99    0.16
  -1   0 -14    4.16    0.15
  -1   0 -14    4.17    0.14
   1   0  14    3.89    0.16
  -2   0 -14    0.50    0.06
   2   0  14    0.60    0.07
   2   0  14    0.57    0.06
  -2   0 -14    0.50    0.05
  -3   0 -14    5.74    0.20
   3   0  14    5.78    0.21
  -3   0 -14    6.14    0.21
   3   0  14    5.63    0.20
  -4   0 -14   49.42    1.22
   4   0  14   50.08    1.21
   4   0  14   48.61    1.22
   4   0  14   47.66    1.23
   5   0  14   35.97    0.95
  -5   0 -14   35.77    0.93
   5   0  14   35.54    0.93
   6   0  14   30.25    0.83
  -6   0 -14   30.98    0.82
   6   0  14   30.89    0.85
   7   0  14    2.72    0.18
  -7   0 -14    2.36    0.15
   7   0  14    2.56    0.16
   8   0  14    0.01    0.05
   8   0  14    0.04    0.06
  -8   0 -14    0.02    0.05
  -9   0 -14    0.02    0.05
   9   0  14    0.07    0.06
   9   0  14    0.05    0.06
  -9  -1  14    0.15    0.06
  -9   1  14    0.01    0.04
   9   1 -14    0.12    0.06
   8  -1 -14    6.03    0.25
  -8  -1  14    5.97    0.26
   8   1 -14    5.82    0.26
  -8   1  14    6.47    0.27
  -7  -1  14    1.94    0.13
   7  -1 -14    2.27    0.13
   7   1 -14    2.14    0.14
  -7   1  14    2.18    0.14
   6  -1 -14    2.55    0.12
   6  -1 -14    2.25    0.13
  -6  -1  14    2.09    0.13
   6   1 -14    2.24    0.14
  -6   1  14    2.51    0.14
   5  -1 -14    0.09    0.04
  -5  -1  14    0.16    0.04
   5  -1 -14    0.11    0.04
  -5  -1  14    0.06    0.04
  -5  -1  14    0.12    0.07
   5   1 -14    0.09    0.04
  -5   1  14    0.11    0.04
  -5   1  14    0.11    0.04
  -4  -1  14    0.51    0.07
   4  -1 -14    0.61    0.06
  -4  -1  14    0.64    0.07
   4  -1 -14    0.58    0.07
  -4  -1  14    0.62    0.09
  -4   1  14    0.58    0.07
  -4   1  14    0.59    0.07
   4   1 -14    0.49    0.07
  -3  -1  14   14.28    0.46
  -3  -1  14   14.58    0.43
  -3  -1  14   15.20    0.41
   3  -1 -14   14.56    0.40
   3  -1 -14   15.22    0.41
  -3   1  14   14.88    0.46
  -3   1  14   15.13    0.40
  -3   1  14   14.53    0.42
   3   1 -14   14.12    0.42
   2  -1 -14    4.47    0.16
  -2  -1  14    4.43    0.18
  -2  -1  14    4.75    0.16
  -2  -1  14    4.76    0.20
   2  -1 -14    4.46    0.16
   2   1 -14    4.81    0.18
  -2   1  14    4.67    0.20
  -2   1  14    4.58    0.15
  -2   1  14    4.71    0.18
   1  -1 -14   28.38    0.70
  -1  -1  14   26.85    0.72
   1  -1 -14   27.27    0.70
  -1  -1  14   28.97    0.68
  -1  -1  14   26.65    0.73
  -1   1  14   27.69    0.72
  -1   1  14   28.61    0.67
   1   1 -14   27.38    0.68
  -1   1  14   27.75    0.75
   0  -1 -14    0.09    0.03
   0  -1 -14    0.16    0.03
   0  -1  14    0.12    0.02
   0  -1  14    0.09    0.04
   0  -1  14    0.10    0.04
   0   1 -14    0.13    0.02
   0   1  14    0.07    0.04
   0   1  14    0.11    0.04
   0   1 -14    0.12    0.03
  -1  -1 -14    0.11    0.03
   1  -1  14    0.15    0.04
   1  -1  14    0.16    0.04
  -1  -1 -14    0.12    0.03
  -1   1 -14    0.15    0.03
  -1   1 -14    0.12    0.03
   1   1  14    0.11    0.04
   1   1  14    0.12    0.05
  -2  -1 -14   10.27    0.30
   2  -1  14   10.27    0.30
  -2  -1 -14   10.30    0.30
   2  -1  14   10.31    0.31
  -2   1 -14   10.63    0.31
  -2   1 -14   10.39    0.30
   2   1  14    9.80    0.31
   2   1  14   10.25    0.33
  -3  -1 -14   16.75    0.46
   3  -1  14   17.07    0.46
   3  -1  14   16.28    0.45
   3   1  14   16.91    0.49
  -3   1 -14   16.67    0.45
   3   1  14   16.62    0.46
  -3   1 -14   15.73    0.46
   3   1  14   16.35    0.46
   4  -1  14    9.23    0.29
  -4  -1 -14    9.31    0.30
   4  -1  14    9.55    0.29
  -4   1 -14   10.10    0.30
   4   1  14    9.41    0.33
  -4   1 -14    9.44    0.30
   4   1  14    9.84    0.30
   4   1  14    9.58    0.30
   5  -1  14   17.45    0.50
  -5  -1 -14   17.76    0.51
   5  -1  14   17.83    0.51
   5   1  14   18.81    0.55
   5   1  14   17.29    0.51
  -5   1 -14   17.10    0.50
   6  -1  14    0.02    0.04
   6  -1  14    0.01    0.04
  -6  -1 -14    0.05    0.04
   6   1  14    0.04    0.05
  -6   1 -14    0.09    0.05
   6   1  14    0.02    0.04
  -7  -1 -14    7.10    0.28
   7  -1  14    7.46    0.30
   7  -1  14    7.12    0.28
   7   1  14    7.49    0.32
  -7   1 -14    7.56    0.29
   7   1  14    7.72    0.29
   8  -1  14    0.28    0.07
   8  -1  14    0.48    0.10
  -8  -1 -14    0.35    0.07
   8   1  14    0.38    0.08
  -8   1 -14    0.44    0.08
   8   1  14    0.32    0.09
   9  -1  14   -0.03    0.05
   9  -1  14    0.08    0.05
  -9  -1 -14    0.05    0.05
  -9   1 -14    0.08    0.05
   9   1  14    0.02    0.05
   9   1  14    0.00    0.05
  -9  -2  14    2.24    0.17
   9   2 -14    2.59    0.17
  -9   2  14    2.19    0.16
  -8  -2  14   -0.01    0.04
   8   2 -14    0.05    0.05
  -8   2  14   -0.01    0.04
  -7  -2  14    3.66    0.19
   7  -2 -14    3.40    0.17
  -7   2  14    3.82    0.19
   7   2 -14    3.65    0.20
   6  -2 -14    1.96    0.12
  -6  -2  14    1.89    0.13
   6   2 -14    1.81    0.13
  -6   2  14    1.77    0.12
  -5  -2  14    0.18    0.05
  -5  -2  14    0.12    0.06
  -5  -2  14    0.17    0.05
   5  -2 -14    0.13    0.04
  -5   2  14    0.20    0.05
   5   2 -14    0.10    0.05
   4  -2 -14    6.26    0.22
  -4  -2  14    6.54    0.28
  -4  -2  14    6.37    0.23
  -4  -2  14    6.59    0.24
  -4   2  14    6.45    0.23
   4   2 -14    6.20    0.24
  -4   2  14    5.96    0.22
   3  -2 -14   35.07    1.14
  -3  -2  14   40.34    1.00
   3  -2 -14   41.15    0.98
  -3  -2  14   39.80    1.05
   3  -2 -14   40.67    1.00
  -3  -2  14   40.84    1.02
   3   2 -14   39.26    1.02
  -3   2  14   38.70    1.01
  -3   2  14   41.17    0.99
   3   2 -14   39.34    1.01
  -2  -2  14    0.23    0.04
   2  -2 -14    0.09    0.05
  -2  -2  14    0.13    0.05
   2  -2 -14    0.16    0.04
   2  -2 -14    0.15    0.03
  -2   2  14    0.22    0.05
   2   2 -14    0.16    0.04
  -2   2  14    0.18    0.03
   2   2 -14    0.14    0.05
   1  -2 -14    5.40    0.17
   1  -2 -14    4.79    0.18
  -1  -2  14    5.24    0.17
  -1  -2  14    4.93    0.19
  -1   2  14    5.27    0.20
   1   2 -14    5.22    0.20
  -1   2  14    5.23    0.16
  -1   2  14    5.16    0.22
   0  -2  14    0.55    0.05
   0  -2 -14    0.50    0.05
   0  -2  14    0.53    0.04
   0  -2 -14    0.54    0.06
   0  -2  14    0.51    0.06
   0   2 -14    0.50    0.04
   0   2  14    0.67    0.09
   0   2  14    0.55    0.07
   0   2 -14    0.57    0.07
   0   2 -14    0.59    0.07
   1  -2  14   13.40    0.40
  -1  -2 -14   13.42    0.38
  -1  -2 -14   13.71    0.36
   1  -2  14   13.61    0.36
   1  -2  14   12.81    0.36
   1  -2  14   13.39    0.36
  -1   2 -14   13.24    0.36
   1   2  14   13.02    0.40
  -1   2 -14   13.78    0.38
   1   2  14   13.89    0.42
   2  -2  14   11.05    0.30
   2  -2  14   10.74    0.34
  -2  -2 -14   10.99    0.34
  -2   2 -14   11.67    0.32
   2   2  14   11.28    0.38
   2   2  14   11.11    0.32
  -2   2 -14   11.86    0.32
   2   2  14   11.23    0.35
  -2   2 -14   11.59    0.34
  -3  -2 -14    0.21    0.05
   3  -2  14    0.21    0.05
   3  -2  14    0.17    0.03
   3   2  14    0.24    0.05
   3   2  14    0.23    0.05
  -3   2 -14    0.27    0.05
   3   2  14    0.12    0.06
  -3   2 -14    0.17    0.04
  -4  -2 -14    4.21    0.18
   4  -2  14    4.14    0.15
   4   2  14    4.22    0.18
   4   2  14    4.00    0.21
   4   2  14    4.18    0.17
  -4   2 -14    4.16    0.17
  -4   2 -14    4.20    0.17
   5  -2  14    0.09    0.05
   5  -2  14    0.02    0.03
  -5  -2 -14    0.00    0.03
  -5   2 -14    0.05    0.04
   5   2  14    0.02    0.03
   5   2  14    0.08    0.05
   6  -2  14    0.55    0.08
   6  -2  14    0.39    0.07
  -6  -2 -14    0.47    0.07
   6   2  14    0.51    0.08
  -6   2 -14    0.46    0.07
   6   2  14    0.67    0.11
   7  -2  14    3.72    0.19
  -7  -2 -14    3.96    0.19
   7  -2  14    3.72    0.19
  -7   2 -14    3.88    0.20
   7   2  14    3.63    0.23
   7   2  14    3.91    0.19
   8  -2  14    2.75    0.17
   8  -2  14    2.82    0.17
  -8  -2 -14    2.67    0.17
  -8   2 -14    2.73    0.17
   8   2  14    2.94    0.20
   8   2  14    2.81    0.18
   9  -2  14    0.27    0.07
   9  -2  14    0.37    0.08
  -9  -2 -14    0.36    0.08
   9   2  14    0.35    0.08
  -9   2 -14    0.38    0.09
  -8  -3  14    0.00    0.04
   8  -3 -14    0.04    0.04
  -8   3  14    0.13    0.06
   8   3 -14    0.11    0.05
  -7  -3  14    0.34    0.08
   7  -3 -14    0.27    0.06
   7   3 -14    0.24    0.07
  -7   3  14    0.22    0.06
  -6  -3  14    1.21    0.12
   6  -3 -14    1.28    0.12
   6   3 -14    1.47    0.14
  -6   3  14    1.31    0.13
  -5  -3  14    8.84    0.36
   5  -3 -14    8.31    0.30
  -5  -3  14    9.07    0.31
   5   3 -14    8.26    0.30
   5   3 -14    8.28    0.30
  -5   3  14    8.90    0.30
  -4  -3  14    1.79    0.15
   4  -3 -14    2.03    0.12
  -4  -3  14    1.96    0.12
   4  -3 -14    1.75    0.14
  -4   3  14    1.97    0.12
  -4   3  14    1.99    0.11
   4   3 -14    1.93    0.13
   4   3 -14    1.93    0.12
   3  -3 -14    0.09    0.05
  -3  -3  14    0.02    0.03
   3  -3 -14    0.03    0.04
  -3  -3  14    0.02    0.05
   3   3 -14    0.05    0.04
  -3   3  14    0.06    0.04
   3   3 -14    0.03    0.04
  -3   3  14    0.09    0.04
   2  -3 -14    3.42    0.18
  -2  -3  14    2.77    0.16
  -2  -3  14    3.24    0.14
   2  -3 -14    3.43    0.15
   2   3 -14    3.34    0.15
  -2   3  14    2.89    0.15
   2   3 -14    3.60    0.17
  -2   3  14    3.30    0.13
   1  -3 -14    7.60    0.26
  -1  -3  14    7.30    0.24
  -1  -3  14    7.09    0.26
  -1  -3  14    7.67    0.25
  -1   3  14    7.90    0.27
   1   3 -14    7.57    0.25
   1   3 -14    7.61    0.27
   0  -3  14   23.13    0.60
   0  -3 -14   23.57    0.62
   0  -3  14   22.87    0.60
   0  -3  14   22.23    0.59
   0   3 -14   22.86    0.61
   0   3 -14   22.22    0.63
   0   3  14   22.17    0.63
   1  -3  14    2.60    0.10
   1  -3  14    2.65    0.12
   1  -3  14    2.57    0.12
  -1  -3 -14    2.48    0.13
  -1   3 -14    2.62    0.13
   1   3  14    2.88    0.15
  -1   3 -14    2.50    0.14
   2  -3  14   43.78    1.07
   2  -3  14   42.80    1.07
  -2  -3 -14   42.52    1.09
  -2   3 -14   43.39    1.07
  -2   3 -14   43.47    1.10
  -2   3 -14   43.34    1.09
   2   3  14   43.61    1.07
   2   3  14   43.68    1.11
  -3  -3 -14   13.23    0.40
  -3   3 -14   13.37    0.39
  -3   3 -14   13.46    0.40
   3   3  14   12.72    0.41
   3   3  14   13.34    0.38
  -3   3 -14   13.94    0.39
  -3   3 -14   13.92    0.39
  -4  -3 -14    3.07    0.16
   4   3  14    3.48    0.17
  -4   3 -14    3.50    0.16
  -4   3 -14    3.61    0.16
   4   3  14    3.42    0.15
  -5  -3 -14    4.62    0.20
   5  -3  14    4.58    0.20
   5  -3  14    4.57    0.16
   5   3  14    5.11    0.20
  -5   3 -14    4.87    0.20
   6  -3  14    0.56    0.08
   6  -3  14    0.41    0.06
  -6  -3 -14    0.47    0.08
   6   3  14    0.39    0.07
  -6   3 -14    0.43    0.07
  -7  -3 -14    0.90    0.11
   7  -3  14    0.89    0.10
   7  -3  14    0.81    0.09
  -7   3 -14    0.96    0.11
   7   3  14    0.90    0.11
  -8  -3 -14    0.06    0.05
   8  -3  14   -0.03    0.04
   8  -3  14   -0.04    0.04
   8   3  14   -0.02    0.04
  -8   3 -14    0.10    0.05
  -8  -4  14    0.88    0.18
   8  -4 -14    0.73    0.10
  -8   4  14    1.02    0.13
   8   4 -14    0.63    0.12
   7  -4 -14    0.46    0.09
  -7  -4  14    0.28    0.08
  -7   4  14    0.33    0.07
   7   4 -14    0.37    0.07
  -6  -4  14    0.72    0.10
   6  -4 -14    0.64    0.10
  -6   4  14    0.77    0.10
   6   4 -14    0.78    0.11
  -5  -4  14    0.73    0.13
   5  -4 -14    0.60    0.09
  -5  -4  14    0.54    0.09
   5  -4 -14    0.61    0.12
   5   4 -14    0.62    0.09
   5   4 -14    0.59    0.09
  -5   4  14    0.51    0.08
   4  -4 -14    3.33    0.18
   4  -4 -14    3.77    0.22
  -4  -4  14    3.63    0.18
  -4  -4  14    3.40    0.21
  -4   4  14    3.34    0.16
  -4   4  14    3.53    0.17
   4   4 -14    3.63    0.17
   4   4 -14    3.28    0.18
  -3  -4  14    2.75    0.18
   3  -4 -14    3.12    0.19
  -3  -4  14    2.62    0.15
   3  -4 -14    2.75    0.15
   3   4 -14    2.72    0.14
   3   4 -14    2.49    0.16
  -3   4  14    2.43    0.15
  -3   4  14    2.74    0.14
  -2  -4  14    0.68    0.08
   2  -4 -14    0.78    0.09
  -2  -4  14    0.84    0.10
   2  -4 -14    0.93    0.12
   2   4 -14    0.87    0.09
  -2   4  14    0.86    0.10
  -2   4  14    0.93    0.08
   2   4 -14    1.00    0.11
   1  -4 -14    5.57    0.22
  -1  -4  14    5.63    0.21
  -1  -4  14    5.56    0.21
  -1  -4  14    5.68    0.22
  -1   4  14    5.62    0.23
   1   4 -14    4.94    0.23
   1   4 -14    5.94    0.22
   0  -4 -14    0.38    0.07
   0  -4  14    0.42    0.06
   0  -4  14    0.34    0.06
   0  -4  14    0.39    0.06
   0   4  14    0.40    0.07
   0   4 -14    0.32    0.05
   0   4 -14    0.33    0.07
  -1  -4 -14   34.96    0.95
   1  -4  14   36.26    0.90
   1  -4  14   36.74    0.94
   1  -4  14   36.75    0.94
  -1   4 -14   36.70    0.97
  -1   4 -14   38.09    0.94
   1   4  14   36.58    0.98
  -2  -4 -14    4.09    0.18
   2  -4  14    3.90    0.17
   2  -4  14    4.02    0.17
  -2   4 -14    3.89    0.19
  -2   4 -14    3.92    0.17
   2   4  14    4.00    0.20
  -3  -4 -14    5.83    0.23
  -3   4 -14    6.04    0.24
  -3   4 -14    6.29    0.22
   3   4  14    5.82    0.25
  -3   4 -14    6.18    0.29
  -3   4 -14    6.09    0.22
  -4  -4 -14    0.75    0.09
  -4   4 -14    0.86    0.09
  -4   4 -14    0.84    0.09
   4   4  14    0.80    0.10
  -5  -4 -14    1.96    0.13
   5  -4  14    1.79    0.08
   5   4  14    1.90    0.13
  -5   4 -14    1.80    0.12
   6  -4  14    2.64    0.12
  -6  -4 -14    2.68    0.16
  -6   4 -14    2.69    0.16
  -7  -4 -14    0.83    0.10
   7  -4  14    0.87    0.09
  -7   4 -14    0.75    0.11
  -6  -5  14    1.90    0.15
   6  -5 -14    2.01    0.16
   6   5 -14    2.14    0.15
  -6   5  14    2.35    0.15
   5  -5 -14    0.70    0.13
  -5  -5  14    0.95    0.14
   5  -5 -14    0.59    0.10
  -5  -5  14    0.84    0.11
  -5   5  14    0.82    0.11
   5   5 -14    1.00    0.12
   5   5 -14    0.86    0.10
   4  -5 -14    0.71    0.10
  -4  -5  14    0.61    0.09
   4  -5 -14    0.73    0.12
  -4  -5  14    0.70    0.12
  -4   5  14    0.74    0.09
   4   5 -14    0.59    0.10
   4   5 -14    0.64    0.09
  -4   5  14    0.69    0.10
  -3  -5  14    0.27    0.07
   3  -5 -14    0.23    0.07
  -3  -5  14    0.30    0.08
   3  -5 -14    0.32    0.07
   3   5 -14    0.30    0.06
   3   5 -14    0.26    0.08
  -3   5  14    0.39    0.07
  -3   5  14    0.37    0.07
  -2  -5  14    0.25    0.06
  -2  -5  14    0.18    0.06
  -2  -5  14    0.27    0.06
   2  -5 -14    0.21    0.06
   2   5 -14    0.29    0.06
  -2   5  14    0.23    0.06
   2   5 -14    0.17    0.06
   1  -5 -14    0.27    0.07
  -1  -5  14    0.32    0.07
  -1  -5  14    0.49    0.08
  -1  -5  14    0.43    0.08
   1   5 -14    0.44    0.07
  -1   5  14    0.32    0.07
   1   5 -14    0.36    0.08
   0  -5  14    2.71    0.15
   0  -5 -14    2.64    0.15
   0  -5  14    2.94    0.16
   0  -5  14    2.57    0.14
   0   5  14    2.67    0.17
   0   5 -14    2.80    0.17
  -1  -5 -14    0.19    0.06
   1  -5  14    0.13    0.05
   1  -5  14    0.13    0.04
   1  -5  14    0.13    0.05
   1   5  14    0.10    0.06
  -1   5 -14    0.12    0.06
   2  -5  14    1.52    0.12
  -2  -5 -14    1.62    0.12
   2  -5  14    1.46    0.08
   2  -5  14    1.55    0.12
  -2   5 -14    1.54    0.13
   2   5  14    1.50    0.13
   3  -5  14    2.13    0.14
   3  -5  14    2.27    0.14
  -3  -5 -14    2.05    0.14
  -3   5 -14    2.12    0.13
  -3   5 -14    2.17    0.14
   3   5  14    2.11    0.15
  -4  -5 -14    5.27    0.23
   4   5  14    5.27    0.25
  -4   5 -14    5.39    0.22
  -5  -5 -14    1.59    0.12
   5   5  14    1.83    0.14
   6  -5  14    0.06    0.05
   6  -5  14    0.06    0.03
  -5  -6  14    0.59    0.11
   5  -6 -14    0.62    0.12
  -5  -6  14    0.39    0.09
  -5   6  14    0.42    0.08
   5   6 -14    0.60    0.10
   4  -6 -14    3.03    0.19
  -4  -6  14    3.80    0.21
  -4  -6  14    3.30    0.23
   4   6 -14    3.11    0.20
  -4   6  14    3.20    0.18
   3  -6 -14   -0.07    0.03
  -3  -6  14    0.03    0.05
  -3  -6  14   -0.05    0.05
   3   6 -14    0.07    0.05
  -3   6  14    0.09    0.05
  -2  -6  14    0.20    0.07
  -2  -6  14    0.24    0.07
  -2  -6  14    0.17    0.07
   2  -6 -14    0.12    0.06
   2   6 -14    0.14    0.06
  -2   6  14    0.16    0.07
   1  -6 -14    0.20    0.07
  -1  -6  14    0.24    0.07
  -1  -6  14    0.14    0.06
  -1  -6  14    0.14    0.05
   1   6 -14    0.27    0.08
  -1   6  14    0.15    0.06
   0  -6 -14    0.84    0.10
   0  -6  14    0.74    0.10
   0  -6  14    0.95    0.11
   0  -6  14    0.56    0.09
   0   6  14    0.85    0.12
   0   6 -14    0.77    0.11
  -1  -6 -14    0.37    0.07
   1  -6  14    0.25    0.06
   1  -6  14    0.27    0.07
   1  -6  14    0.35    0.08
   1   6  14    0.30    0.08
  -1   6 -14    0.37    0.08
   2  -6  14   -0.04    0.03
  -2  -6 -14    0.02    0.04
   2  -6  14   -0.01    0.04
   2  -6  14    0.04    0.04
  -2   6 -14    0.00    0.04
   2   6  14    0.04    0.05
   3  -6  14   -0.01    0.03
   3  -6  14    0.16    0.06
   3  -6  14    0.06    0.05
  -3  -6 -14    0.01    0.04
  -3   6 -14    0.02    0.03
   3   6  14    0.05    0.05
   4  -6  14    0.22    0.03
   4   6  14    0.18    0.07
  -4   6 -14    0.21    0.05
   5   6  14    0.04    0.05
  -1  -7  14    0.17    0.07
   1  -7 -14    0.12    0.06
  -1  -7  14    0.20    0.10
  -1  -7  14    0.13    0.06
  -1   7  14    0.32    0.08
   1   7 -14    0.17    0.08
   0  -7  14    0.30    0.09
   0  -7  14    0.34    0.08
   0  -7  14    0.23    0.08
   0  -7 -14    0.30    0.07
   0   7 -14    0.26    0.08
   0   7  14    0.18    0.07
  -1  -7 -14    0.80    0.11
   1  -7  14    0.84    0.12
   1  -7  14    1.08    0.13
   1  -7  14    0.89    0.11
  -1   7 -14    0.88    0.12
   1   7  14    1.13    0.19
  -9   0  15    0.03    0.04
   9   0 -15    0.04    0.04
   8   0 -15   -0.03    0.03
  -8   0  15    0.01    0.04
  -7   0  15    0.07    0.04
   7   0 -15    0.00    0.04
  -6   0  15    0.02    0.04
   6   0 -15    0.05    0.04
  -5   0  15   -0.01    0.03
   5   0 -15   -0.02    0.03
  -5   0  15    0.00    0.03
  -4   0  15    0.03    0.03
   4   0 -15   -0.01    0.03
  -4   0  15    0.02    0.05
  -4   0  15    0.03    0.03
  -3   0  15    0.00    0.03
  -3   0  15    0.01    0.02
  -3   0  15    0.00    0.04
   3   0 -15   -0.02    0.02
   3   0 -15    0.01    0.02
  -2   0  15   -0.01    0.03
   2   0 -15   -0.02    0.02
  -2   0  15   -0.01    0.02
  -2   0  15   -0.01    0.03
   2   0 -15   -0.02    0.03
  -1   0  15    0.07    0.04
  -1   0  15    0.06    0.03
  -1   0  15    0.04    0.02
   1   0 -15   -0.02    0.02
   1   0 -15   -0.01    0.02
   0   0 -15    0.06    0.02
   0   0  15    0.09    0.04
   0   0  15    0.00    0.03
   0   0 -15    0.01    0.02
   1   0  15   -0.02    0.03
   1   0  15    0.00    0.03
  -1   0 -15    0.09    0.03
  -1   0 -15    0.02    0.02
  -2   0 -15    0.01    0.02
  -2   0 -15   -0.02    0.02
   2   0  15    0.01    0.03
   2   0  15   -0.02    0.03
  -3   0 -15    0.06    0.03
   3   0  15    0.00    0.04
   3   0  15   -0.05    0.03
  -3   0 -15    0.04    0.03
  -4   0 -15    0.02    0.04
   4   0  15    0.02    0.04
   4   0  15   -0.01    0.05
   4   0  15   -0.01    0.03
   5   0  15   -0.01    0.05
  -5   0 -15    0.02    0.04
   5   0  15   -0.04    0.03
   6   0  15    0.01    0.04
   6   0  15   -0.03    0.05
  -6   0 -15    0.05    0.04
  -7   0 -15    0.02    0.04
   7   0  15    0.03    0.06
   7   0  15    0.00    0.04
  -8   0 -15   -0.01    0.04
   8   0  15   -0.06    0.04
   8   0  15    0.06    0.06
  -9   0 -15    0.00    0.05
   9   0  15    0.00    0.04
   9   0  15    0.09    0.06
  -9  -1  15    1.04    0.13
  -9   1  15    0.88    0.12
   9   1 -15    0.98    0.12
  -8  -1  15    1.33    0.14
   8  -1 -15    1.32    0.11
  -8   1  15    1.11    0.12
   8   1 -15    1.29    0.14
   7  -1 -15    0.94    0.10
  -7  -1  15    0.82    0.10
   7   1 -15    0.90    0.11
  -7   1  15    0.79    0.10
  -6  -1  15    0.07    0.04
   6  -1 -15    0.07    0.04
   6   1 -15    0.06    0.04
  -6   1  15    0.17    0.05
  -5  -1  15    0.96    0.13
  -5  -1  15    0.79    0.09
  -5  -1  15    0.84    0.09
   5  -1 -15    0.80    0.08
   5  -1 -15    0.75    0.08
   5   1 -15    0.62    0.08
  -5   1  15    0.87    0.09
  -5   1  15    0.88    0.09
  -4  -1  15   12.17    0.36
  -4  -1  15   12.34    0.38
  -4  -1  15   12.15    0.42
   4  -1 -15   12.57    0.35
   4  -1 -15   12.26    0.36
   4   1 -15   11.61    0.37
  -4   1  15   12.10    0.37
  -4   1  15   11.69    0.35
  -3  -1  15    2.26    0.15
   3  -1 -15    2.28    0.11
   3  -1 -15    2.46    0.11
  -3  -1  15    2.52    0.11
  -3  -1  15    2.23    0.13
  -3   1  15    2.47    0.11
  -3   1  15    2.45    0.13
   3   1 -15    2.35    0.12
  -3   1  15    2.25    0.15
   2  -1 -15   34.24    0.84
  -2  -1  15   34.05    0.83
  -2  -1  15   34.28    0.87
  -2  -1  15   32.90    0.89
   2  -1 -15   33.33    0.84
  -2   1  15   33.89    0.90
  -2   1  15   33.43    0.87
  -2   1  15   34.01    0.82
   2   1 -15   32.98    0.86
   1  -1 -15   12.57    0.36
   1  -1 -15   12.36    0.36
  -1  -1  15   13.43    0.34
  -1  -1  15   12.88    0.39
  -1  -1  15   13.07    0.39
  -1   1  15   12.63    0.38
   1   1 -15   12.97    0.33
   1   1 -15   12.82    0.37
  -1   1  15   12.80    0.40
   0  -1  15    1.75    0.10
   0  -1 -15    1.75    0.09
   0  -1 -15    1.52    0.09
   0  -1  15    1.71    0.10
   0   1  15    1.44    0.11
   0   1 -15    1.76    0.08
   0   1  15    1.53    0.10
  -1  -1 -15    0.28    0.05
   1  -1  15    0.16    0.04
  -1  -1 -15    0.24    0.04
   1  -1  15    0.26    0.05
   1   1  15    0.25    0.05
  -1   1 -15    0.22    0.04
  -1   1 -15    0.24    0.04
   1   1  15    0.31    0.06
   2  -1  15   15.80    0.44
   2  -1  15   16.82    0.46
  -2  -1 -15   16.45    0.45
  -2  -1 -15   16.80    0.45
  -2   1 -15   15.86    0.44
   2   1  15   15.91    0.48
   2   1  15   17.06    0.47
  -2   1 -15   16.16    0.45
  -3  -1 -15    0.79    0.08
   3  -1  15    0.70    0.07
  -3  -1 -15    0.77    0.08
   3  -1  15    0.75    0.08
  -3   1 -15    0.79    0.08
   3   1  15    0.81    0.10
  -3   1 -15    0.73    0.08
   3   1  15    0.70    0.08
   4  -1  15    6.61    0.22
   4  -1  15    6.36    0.23
  -4  -1 -15    6.39    0.23
  -4   1 -15    6.55    0.24
   4   1  15    6.42    0.23
   4   1  15    6.91    0.23
  -4   1 -15    6.59    0.23
   4   1  15    6.35    0.26
  -5  -1 -15    2.97    0.16
   5  -1  15    3.40    0.16
   5  -1  15    3.49    0.17
  -5   1 -15    3.20    0.16
   5   1  15    3.25    0.16
   5   1  15    3.39    0.19
  -6  -1 -15    0.66    0.09
   6  -1  15    0.91    0.11
   6  -1  15    0.92    0.11
   6   1  15    0.81    0.11
   6   1  15    0.97    0.11
  -6   1 -15    0.80    0.10
   7  -1  15    0.85    0.11
  -7  -1 -15    0.98    0.11
   7  -1  15    1.04    0.12
   7   1  15    1.17    0.15
  -7   1 -15    0.95    0.11
   7   1  15    1.13    0.12
  -8  -1 -15    6.55    0.27
   8  -1  15    6.54    0.29
   8  -1  15    6.31    0.28
   8   1  15    6.42    0.28
  -8   1 -15    5.65    0.26
   8   1  15    6.88    0.32
   9  -1  15    0.64    0.11
  -9  -1 -15    0.60    0.10
   9  -1  15    0.73    0.11
   9   1  15    0.70    0.12
  -9   1 -15    0.52    0.09
   9   1  15    0.59    0.10
  -9  -2  15    0.36    0.08
  -9   2  15    0.34    0.08
   9   2 -15    0.24    0.07
  -8  -2  15    1.35    0.14
   8   2 -15    1.53    0.15
  -8   2  15    1.07    0.12
   7  -2 -15    0.48    0.07
  -7  -2  15    0.40    0.08
  -7   2  15    0.37    0.08
   7   2 -15    0.56    0.09
  -6  -2  15    0.02    0.04
   6  -2 -15   -0.03    0.03
  -6   2  15    0.00    0.03
   6   2 -15   -0.04    0.04
  -5  -2  15    6.45    0.25
  -5  -2  15    6.80    0.25
  -5  -2  15    6.39    0.30
   5  -2 -15    6.56    0.24
  -5   2  15    6.53    0.24
   5   2 -15    6.54    0.25
   4  -2 -15    8.44    0.28
  -4  -2  15    9.21    0.35
  -4  -2  15    8.70    0.30
  -4  -2  15    9.03    0.29
  -4   2  15    8.69    0.29
  -4   2  15    8.26    0.27
   4   2 -15    8.52    0.30
  -3  -2  15   18.27    0.55
   3  -2 -15   18.35    0.50
   3  -2 -15   18.27    0.48
  -3  -2  15   18.04    0.49
  -3  -2  15   17.76    0.52
  -3   2  15   17.69    0.48
   3   2 -15   17.76    0.51
  -3   2  15   17.87    0.51
   2  -2 -15   20.93    0.52
  -2  -2  15   19.98    0.57
  -2  -2  15   19.12    0.57
  -2  -2  15   20.44    0.53
   2  -2 -15   20.70    0.55
   2   2 -15   19.12    0.55
  -2   2  15   20.19    0.52
  -2   2  15   20.12    0.56
  -1  -2  15    1.53    0.11
  -1  -2  15    1.57    0.11
  -1  -2  15    1.58    0.08
   1  -2 -15    1.77    0.08
   1  -2 -15    1.74    0.10
  -1   2  15    1.59    0.12
  -1   2  15    1.72    0.11
   1   2 -15    1.48    0.10
   0  -2 -15    0.51    0.06
   0  -2  15    0.41    0.06
   0  -2  15    0.55    0.05
   0  -2  15    0.52    0.06
   0  -2 -15    0.42    0.05
   0  -2  15    0.55    0.05
   0   2 -15    0.54    0.07
   0   2  15    0.60    0.08
   0   2  15    0.50    0.08
  -1  -2 -15   35.95    0.88
  -1  -2 -15   35.22    0.90
   1  -2  15   35.56    0.92
   1  -2  15   35.65    0.88
   1   2  15   33.78    0.91
  -1   2 -15   36.44    0.87
  -1   2 -15   35.67    0.90
   1   2  15   34.79    0.94
   2  -2  15    5.86    0.19
  -2  -2 -15    5.77    0.21
   2  -2  15    5.83    0.22
  -2  -2 -15    5.91    0.20
   2   2  15    6.49    0.26
  -2   2 -15    6.18    0.20
  -2   2 -15    6.08    0.21
   2   2  15    5.96    0.23
   3  -2  15    2.79    0.11
   3  -2  15    2.99    0.14
  -3  -2 -15    2.90    0.14
   3   2  15    3.29    0.18
   3   2  15    3.06    0.14
  -3   2 -15    2.90    0.13
  -3   2 -15    2.93    0.14
   3   2  15    3.08    0.15
  -4  -2 -15   25.24    0.69
   4  -2  15   25.44    0.65
   4   2  15   25.88    0.69
  -4   2 -15   25.64    0.69
   4   2  15   25.43    0.68
   4   2  15   25.54    0.74
  -4   2 -15   25.64    0.68
   5  -2  15    0.43    0.07
  -5  -2 -15    0.46    0.07
   5  -2  15    0.52    0.07
   5   2  15    0.71    0.11
   5   2  15    0.43    0.07
  -5   2 -15    0.55    0.08
   6  -2  15    1.11    0.10
  -6  -2 -15    0.93    0.11
   6  -2  15    1.18    0.12
   6   2  15    1.18    0.12
   6   2  15    1.42    0.16
  -6   2 -15    1.14    0.12
   7  -2  15    2.71    0.16
   7  -2  15    3.12    0.18
  -7  -2 -15    2.95    0.17
   7   2  15    3.17    0.18
   7   2  15    2.86    0.20
  -7   2 -15    3.22    0.18
  -8  -2 -15    0.41    0.08
   8  -2  15    0.43    0.08
   8  -2  15    0.41    0.08
   8   2  15    0.49    0.10
   8   2  15    0.53    0.09
  -8   2 -15    0.48    0.09
   8  -3 -15    0.08    0.04
  -8  -3  15    0.05    0.05
  -8   3  15    0.04    0.05
   8   3 -15    0.09    0.05
   7  -3 -15    0.25    0.06
  -7  -3  15    0.18    0.06
  -7   3  15    0.23    0.07
   7   3 -15    0.23    0.07
  -6  -3  15    0.03    0.05
   6  -3 -15    0.06    0.05
   6   3 -15    0.05    0.05
  -6   3  15    0.05    0.04
   5  -3 -15    2.19    0.14
  -5  -3  15    2.33    0.18
  -5  -3  15    2.25    0.14
   5   3 -15    2.40    0.15
   5   3 -15    2.44    0.15
  -5   3  15    2.31    0.13
  -4  -3  15    1.39    0.15
   4  -3 -15    1.74    0.12
  -4  -3  15    1.58    0.11
   4   3 -15    1.64    0.12
  -4   3  15    1.73    0.11
  -4   3  15    1.52    0.10
   4   3 -15    1.49    0.11
  -3  -3  15    1.16    0.13
  -3  -3  15    1.03    0.08
   3  -3 -15    1.23    0.10
   3   3 -15    1.20    0.11
  -3   3  15    1.05    0.08
   3   3 -15    1.20    0.09
  -3   3  15    1.14    0.10
   2  -3 -15    0.14    0.05
  -2  -3  15    0.15    0.06
  -2  -3  15    0.15    0.04
   2   3 -15    0.17    0.05
   2   3 -15    0.14    0.05
  -2   3  15    0.16    0.05
  -1  -3  15   23.38    0.65
  -1  -3  15   24.44    0.64
  -1  -3  15   24.24    0.64
   1  -3 -15   23.85    0.65
   1   3 -15   24.16    0.67
   1   3 -15   24.87    0.65
  -1   3  15   24.60    0.67
   0  -3 -15    1.03    0.10
   0  -3  15    0.85    0.07
   0  -3  15    0.84    0.07
   0  -3  15    0.87    0.08
   0   3 -15    1.02    0.08
   0   3 -15    0.94    0.10
   0   3  15    0.87    0.10
  -1  -3 -15    8.09    0.28
   1  -3  15    8.35    0.26
   1  -3  15    8.59    0.26
   1  -3  15    8.87    0.25
   1   3  15    8.46    0.30
  -1   3 -15    8.08    0.29
  -1   3 -15    8.60    0.28
  -2  -3 -15   -0.01    0.03
   2  -3  15   -0.02    0.02
  -2   3 -15    0.03    0.03
   2   3  15    0.12    0.05
   2   3  15    0.01    0.03
  -2   3 -15   -0.04    0.02
  -2   3 -15   -0.03    0.03
   3  -3  15    3.04    0.15
  -3  -3 -15    3.07    0.15
  -3   3 -15    3.19    0.14
  -3   3 -15    3.24    0.15
   3   3  15    3.25    0.14
   3   3  15    3.30    0.17
   4  -3  15    0.19    0.03
  -4  -3 -15    0.21    0.06
   4   3  15    0.19    0.06
   4   3  15    0.21    0.05
  -4   3 -15    0.20    0.05
  -4   3 -15    0.19    0.05
   5  -3  15    3.02    0.16
   5  -3  15    3.06    0.12
  -5  -3 -15    3.43    0.17
  -5   3 -15    3.05    0.16
   5   3  15    3.09    0.15
  -6  -3 -15    0.12    0.05
   6  -3  15    0.06    0.04
   6  -3  15    0.11    0.05
   6   3  15    0.09    0.04
  -6   3 -15    0.06    0.04
   7  -3  15    0.69    0.09
   7  -3  15    0.91    0.11
  -7  -3 -15    0.82    0.10
   7   3  15    0.70    0.10
  -7   3 -15    0.80    0.10
   8  -3  15    0.79    0.10
   8  -3  15    0.92    0.11
  -8  -3 -15    0.88    0.11
   8   3  15    0.88    0.11
  -8   3 -15    0.75    0.11
  -7  -4  15    0.93    0.12
   7  -4 -15    1.12    0.13
  -7   4  15    1.17    0.13
   7   4 -15    0.96    0.12
  -6  -4  15    0.01    0.04
   6  -4 -15    0.05    0.05
  -6   4  15    0.03    0.04
   6   4 -15    0.03    0.04
  -5  -4  15    0.02    0.04
   5  -4 -15    0.00    0.04
  -5  -4  15   -0.03    0.05
   5   4 -15   -0.01    0.04
   5   4 -15    0.03    0.04
  -5   4  15    0.03    0.04
  -4  -4  15    0.36    0.07
   4  -4 -15    0.38    0.07
  -4  -4  15    0.37    0.09
   4   4 -15    0.40    0.08
  -4   4  15    0.33    0.07
  -4   4  15    0.35    0.06
   4   4 -15    0.34    0.06
  -3  -4  15    0.03    0.04
   3  -4 -15    0.01    0.04
  -3  -4  15    0.01    0.05
   3   4 -15    0.02    0.03
  -3   4  15   -0.02    0.04
  -3   4  15    0.02    0.03
   3   4 -15   -0.01    0.04
   2  -4 -15    0.06    0.04
  -2  -4  15   -0.01    0.04
  -2  -4  15    0.03    0.03
   2   4 -15    0.06    0.05
   2   4 -15    0.03    0.03
  -2   4  15   -0.06    0.03
  -1  -4  15    4.53    0.19
   1  -4 -15    4.79    0.20
  -1  -4  15    4.30    0.19
  -1  -4  15    4.26    0.19
   1   4 -15    4.34    0.19
  -1   4  15    4.46    0.21
   1   4 -15    4.97    0.22
   0  -4  15   16.07    0.46
   0  -4 -15   15.40    0.47
   0  -4  15   15.25    0.45
   0  -4  15   16.30    0.46
   0   4 -15   15.78    0.49
   0   4 -15   16.03    0.46
   0   4  15   16.03    0.49
   1  -4  15    3.64    0.16
   1  -4  15    3.54    0.14
   1  -4  15    3.76    0.16
  -1  -4 -15    3.61    0.17
  -1   4 -15    3.69    0.19
   1   4  15    3.85    0.19
  -1   4 -15    3.62    0.16
  -2  -4 -15    0.17    0.05
   2  -4  15    0.13    0.03
   2  -4  15    0.17    0.04
   2  -4  15    0.08    0.04
   2   4  15    0.06    0.05
  -2   4 -15    0.15    0.05
  -2   4 -15    0.19    0.05
  -3  -4 -15    0.25    0.06
  -3   4 -15    0.17    0.05
   3   4  15    0.13    0.06
  -3   4 -15    0.16    0.05
  -4  -4 -15    2.58    0.15
  -4   4 -15    3.15    0.15
  -4   4 -15    2.85    0.15
   4   4  15    2.80    0.16
  -5  -4 -15    0.04    0.04
   5   4  15   -0.01    0.04
  -5   4 -15   -0.04    0.03
   6  -4  15    0.34    0.05
  -6  -4 -15    0.34    0.07
  -6   4 -15    0.29    0.07
  -7  -4 -15    0.32    0.07
   7  -4  15    0.15    0.05
  -7   4 -15    0.15    0.06
   6  -5 -15    1.18    0.14
  -6  -5  15    1.12    0.13
  -6   5  15    1.02    0.12
   6   5 -15    0.93    0.11
  -5  -5  15    1.53    0.18
   5  -5 -15    1.44    0.14
  -5  -5  15    1.60    0.13
  -5   5  15    1.47    0.12
   5   5 -15    1.49    0.16
   5   5 -15    1.40    0.12
  -4  -5  15    2.08    0.18
  -4  -5  15    2.03    0.15
   4  -5 -15    2.01    0.15
  -4   5  15    2.06    0.14
  -4   5  15    1.96    0.13
[truncated: 149,875 more chars]
